# Supplementary material for: The pig pangenome provides insights into the roles of coding structural variations in genetic diversity and adaptation
Source: HighWire-hosted journal article supplement (doi:10.1101/gr.277638.122), 2023-10-01
Supplement: Supplemental_Tables.xlsx [file Supplemental_Tables.xlsx]

## Sheet: Supplemental_Table_S1
Supplemental Table S1. Sequencing data of 64 pigs generated in this study
Individual	Abbreviation	Full name	Location	Size(Gb)	Tissues collected for RNA-seq
HZ01	GDS4	Guangdong Small-ear Spotted	Zhanjiang, Guangdong	120.45	spleen, longissimus dorsi muscle, subcutaneous adipose, kidney, liver
HZ02	GDS5	Guangdong Small-ear Spotted	Zhanjiang, Guangdong	121.27	spleen, longissimus dorsi muscle, subcutaneous adipose, kidney, liver
LT01	LTA4	Lantang	Heyuan, Guangdong	121.15	spleen, longissimus dorsi muscle, subcutaneous adipose, kidney, liver
LT02	LTA5	Lantang	Heyuan, Guangdong	120.29	spleen, longissimus dorsi muscle, subcutaneous adipose, kidney, liver
S01	SB4	Saba	Chuxiong, Yunnan	121.22	spleen, longissimus dorsi muscle, subcutaneous adipose, kidney, liver
S02	SB5	Saba	Chuxiong, Yunnan	121.01	spleen, longissimus dorsi muscle, subcutaneous adipose, kidney, liver
C01	MZ7	Minzhu	Northeast_China	120.28	spleen, longissimus dorsi muscle, subcutaneous adipose, kidney, liver
C02	MZ8	Minzhu	Northeast_China	123.03	spleen, longissimus dorsi muscle, subcutaneous adipose, kidney, liver
WZ01	WZS7	Wuzhishan	Hainan	128.3	spleen, longissimus dorsi muscle, subcutaneous adipose, kidney, liver
WZ02	WZS8	Wuzhishan	Hainan	120.81	spleen, longissimus dorsi muscle, subcutaneous adipose, kidney, liver
DABAI01	YS35	Yorkshire	Europe	121	spleen, longissimus dorsi muscle, subcutaneous adipose, kidney, liver
DABAI02	YS36	Yorkshire	Europe	121	spleen, longissimus dorsi muscle, subcutaneous adipose, kidney, liver
CHANGBAI01	LR19	Landrace	Europe	123	spleen, longissimus dorsi muscle, subcutaneous adipose, kidney, liver
CHANGBAI02	LR20	landrace	Europe	122	spleen, longissimus dorsi muscle, subcutaneous adipose, kidney, liver
D01	DR8	duroc	Europe	121	spleen, longissimus dorsi muscle, subcutaneous adipose, kidney, liver
D02	DR9	duroc	Europe	120	spleen, longissimus dorsi muscle, subcutaneous adipose, kidney, liver
BSHM1	BS1	Baoshan	Baoshan, Yunnan	118.91
s09-2820	BS2	Baoshan	Baoshan, Yunnan	107.55
s1401	BS3	Baoshan	Baoshan, Yunnan	120.52
DB24	DB1	Debao	Debao, Guangxi	107.45
DB5005	DB2	Debao	Debao, Guangxi	88.51
DB8016	DB3	Debao	Debao, Guangxi	102.23
DNF52	DNS1	Diannan Small-ear	Xishuangbanna, Yunnan	97.03
DNF58	DNS2	Diannan Small-ear	Xishuangbanna, Yunnan	107.86
DNM73	DNS3	Diannan Small-ear	Xishuangbanna, Yunnan	106.75
GLHF22	GLGS1	Gaoligongshan	Nujiang, Yunnan	105.9
GLHM1	GLGS2	Gaoligongshan	Nujiang, Yunnan	104.45
GLM12	GLGS3	Gaoligongshan	Nujiang, Yunnan	105.92
s121	GDS1	Guangdong Small-ear Spotted	Zhanjiang, Guangdong	96.38
s191	GDS2	Guangdong Small-ear Spotted	Zhanjiang, Guangdong	101.08
s75	GDS3	Guangdong Small-ear Spotted	Zhanjiang, Guangdong	101.45
GGZM02	GZ1	Guanzhuang Spotted	Longyan, Fujian	94.21
GZ08F	GZ2	Guanzhuang Spotted	Longyan, Fujian	112.91
GZHF10	GZ3	Guanzhuang Spotted	Longyan, Fujian	110.95
GF38	GZS1	Guizhong Spotted	Baise, Guangxi	108.92
GF99	GZS2	Guizhong Spotted	Baise, Guangxi	99.8
GM12	GZS3	Guizhong Spotted	Baise, Guangxi	114.73
HF15	HUAI1	Huai	Longyan, Fujian	127.47
HM19	HUAI2	Huai	Longyan, Fujian	99.08
HM31	HUAI3	Huai	Longyan, Fujian	109.5
B14202	LTA1	Lantang	Heyuan, Guangdong	87.21
B27702	LTA2	Lantang	Heyuan, Guangdong	88.41
MB1205	LTA3	Lantang	Heyuan, Guangdong	99.53
A14002	LBW1	Large Black-white	Huizhou, Guangdong	105.62
A8802	LBW2	Large Black-white	Huizhou, Guangdong	114.94
MA2606	LBW3	Large Black-white	Huizhou, Guangdong	95.45
LL0012	LONGL1	Longlin	Longlin, Guangxi	128.94
LL7105	LONGL2	Longlin	Longlin, Guangxi	107.74
LL7839	LONGL3	Longlin	Longlin, Guangxi	98.71
MBH16F	MBS1	Minbei Spotted	Shunchang, Fujian	116.43
MBH18M	MBS2	Minbei Spotted	Shunchang, Fujian	109.02
MBH3M	MBS3	Minbei Spotted	Shunchang, Fujian	109.95
PTHF7	PT1	Putian	Putian, Fujian	96.37
PTHM16	PT2	Putian	Putian, Fujian	107.7
s6280	PT3	Putian	Putian, Fujian	102.18
SBF55	SB1	Saba	Chuxiong, Yunnan	104.49
SBF60	SB2	Saba	Chuxiong, Yunnan	113.2
SBM01	SB3	Saba	Chuxiong, Yunnan	121.09
s2007	TCH1	Tunchang	Tunchang, Hainan	127.82
s6062	TCH2	Tunchang	Tunchang, Hainan	104.94
s7082	YDB4	Tunchang	Tunchang, Hainan	125.54
D310	YDB1	Yuedong Black	Meizhou, Guangdong	97.27
JLBM1	YDB3	Yuedong Black	Meizhou, Guangdong	93.7
F320	YDB2	Yuedong Black	Meizhou, Guangdong	94.01

## Sheet: Supplemental_Table_S2
Supplemental Table S2. Sequencing data of Chinese pigs downloaded from NCBI
Abbreviation	Full name	Size(Gb)	lndividual	Location	Sequence Read Archive (SRA)
WZS1	Wuzhishan	67.1	BGI_WZS_WZS149	Hainan	SRR949625,SRR949626
WZS2	Wuzhishan	68.1	BGI_WZS_WZS809	Hainan	SRR949627,SRR949628
WZS3	Wuzhishan	66.5	BGI_WZS_WZS889	Hainan	SRR949629, SRR949630
WZS4	Wuzhishan	66.3	BGI_WZS_WZS947	Hainan	SRR949631,SRR949632
WZS5	Wuzhishan	67.8	BGI_WZS_WZS955	Hainan	SRR949633,SRR949634
WZS6	Wuzhishan	69.6	BGI_WZS_WZS973	Hainan	SRR949635,SRR949636
LC1	luchuan	64.2	BGI_LUC_LUC2016	Guangxi Luchuan	SRR949668,SRR949667
LC2	luchuan	72.8	BGI_LUC_LUC206	Guangxi Luchuan	SRR949666,SRR949665
LC3	luchuan	68.3	BGI_LUC_LUC202	Guangxi Luchuan	SRR949664,SRR949663
LC4	luchuan	69.9	BGI_LUC_LUC208	Guangxi Luchuan	SRR949662,SRR949661
LC5	luchuan	69.8	BGI_LUC_LUC207	Guangxi Luchuan	SRR949660,SRR949659
LC6	luchuan	61	BGI_LUC_LUC201	Guangxi Luchuan	SRR949658,SRR949657
BMX1	bamaxiang	69.6	BGI_BMX_BMX0015	Guangxi Bama	SRR949752,SRR949751
BMX2	bamaxiang	69.6	BGI_BMX_BMX0014	Guangxi Bama	SRR949750,SRR949749
BMX3	bamaxiang	70.5	BGI_BMX_BMX0013	Guangxi Bama	SRR949748,SRR949747
BMX4	bamaxiang	54.3	BGI_BMX_BMX0012	Guangxi Bama	SRR949746,SRR949745
BMX5	bamaxiang	72.9	BGI_BMX_BMX0005	Guangxi Bama	SRR949744,SRR949743
BMX6	bamaxiang	68.5	BGI_BMX_BMX0001	Guangxi Bama	SRR949741,SRR949742
HTDE1	Hetaodaer	66.8	BGI_HTDE_HTDE12	Inner Mongolia	SRR949715,SRR949716
HTDE2	Hetaodaer	63.9	BGI_HTDE_HTDE70	Inner Mongolia	SRR949717,SRR949718
HTDE3	Hetaodaer	54.4	BGI_HTDE_HTDE125	Inner Mongolia	SRR949719,SRR949720,SRR949721,SRR949722
HTDE4	Hetaodaer	51.9	BGI_HTDE_HTDE201	Inner Mongolia	SRR949723,SRR949724
HTDE5	Hetaodaer	54.4	BGI_HTDE_HTDE314	Inner Mongolia	SRR949725,SRR949726
HTDE6	Hetaodaer	64.1	BGI_HTDE_HTDE328	Inner Mongolia	SRR949727,SRR949728
MZ1	Minzhu	36.8	BGI_MIN_MZ-304-07	Northeast_China	SRR949729,SRR949730
MZ2	Minzhu	65.8	BGI_MIN_MZ-307-00	Northeast_China	SRR949731,SRR949732
MZ3	Minzhu	67.9	BGI_MIN_MZhu3134	Northeast_China	SRR949733,SRR949734
MZ4	Minzhu	60.3	BGI_MIN_MZhu3252	Northeast_China	SRR949735,SRR949736
MZ6	Minzhu	68.3	BGI_MIN_MZhu3126	Northeast China	SRR949740,SRR949739
MZ5	Minzhu	69.4	BGI_MIN_MZhu3312	Northeast_China	SRR949737, SRR949738
LW1	Laiwu Black	65.6	BGI_LWH_LWH0F	Laiwu Shandong	SRR949753,SRR949754
LW2	Laiwu Black	61.6	BGI_LWH_LWH0M	Laiwu Shandong	SRR949755,SRR949756
LW3	Laiwu Black	71	BGI_LWH_LWH13	Laiwu Shandong	SRR949757,SRR949758
LW4	Laiwu Black	68.7	BGI_LWH_LWH181	Laiwu Shandong	SRR949759,SRR949760
LW5	Laiwu Black	69.8	BGI_LWH_LWH879	Laiwu Shandong	SRR949761,SRR949762
LW6	Laiwu Black	69.4	BGI_LWH_LWH1183	Laiwu Shandong	SRR949763,SRR949764
EHL4	Erhualian	71.6	BGI_EHL_ER_CS0234	Hainan	SRR949637,SRR949638
EHL5	Erhualian	68.7	BGI_EHL_ER_CS3544	Hainan	SRR949639,SRR949640
EHL6	Erhualian	64.4	Erhualian_b16	Jiangsu	SRR7772141
EHL7	Erhualian	65.4	Erhualian_b15	Jiangsu	SRR7772142
EHL8	Erhualian	66.2	Erhualian_b17	Jiangsu	SRR7772144
EHL9	Erhualian	61.3	Erhualian_b12	Jiangsu	SRR7772145
EHL10	Erhualian	63.8	Erhualian_b11	Jiangsu	SRR7772146
EHL11	Erhualian	63.5	Erhualian_b14	Jiangsu	SRR7772147
EHL12	Erhualian	64.3	Erhualian_b13	Jiangsu	SRR7772148
EHL13	Erhualian	63.4	Erhualian_b8	Jiangsu	SRR7772149
EHL14	Erhualian	64.4	Erhualian_b7	Jiangsu	SRR7772150
EHL15	Erhualian	65	Erhualian_b6	Jiangsu	SRR7772151
EHL16	Erhualian	64.3	Erhualian_b5	Jiangsu	SRR7772152
EHL17	Erhualian	91.9	Erhualian_b4	Jiangsu	SRR7772153
EHL18	Erhualian	89.1	Erhualian_b3	Jiangsu	SRR7772154
EHL19	Erhualian	92.4	Erhualian_b2	Jiangsu	SRR7772155
EHL20	Erhualian	91.7	Erhualian_b1	Jiangsu	SRR7772156
EHL21	Erhualian	64.6	Erhualian_b10	Jiangsu	SRR7772157
EHL22	Erhualian	64.6	Erhualian_b9	Jiangsu	SRR7772158
TBSC1	Tibetan pig	70.9	CB10-1	Sichuan	SRR9599711
TBSC2	Tibetan pig	63.7	CB23-3	Sichuan	SRR9599715
TBSC3	Tibetan pig	70.5	CB23-4	Sichuan	SRR9599716
TBSC4	Tibetan pig	64.3	CB23-1	Sichuan	SRR9599721
TBSC5	Tibetan pig	72.2	CB23-2	Sichuan	SRR9599722
TBSC6	Tibetan pig	62.5	CB23-5	Sichuan	SRR9599743
TBYN1	Tibetan pig	72.9	CB22-2	Yunnan	SRR9599714
TBYN2	Tibetan pig	64	CB22-1	Yunnan	SRR9599717
TBYN3	Tibetan pig	62.4	CB22-5	Yunnan	SRR9599718
TBYN4	Tibetan pig	65.6	CB22-3	Yunnan	SRR9599735
TBYN5	Tibetan pig	63.1	CB22-6	Yunnan	SRR9599736
TBYN6	Tibetan pig	63.8	CB22-4	Yunnan	SRR9599738
TBGS1	Tibetan pig	67.2	CB24-5	Gansu	SRR9599719
TBGS2	Tibetan pig	66.4	CB24-6	Gansu	SRR9599720
TBGS3	Tibetan pig	74.7	CB24-2	Gansu	SRR9599724
TBGS4	Tibetan pig	64.5	CB24-3	Gansu	SRR9599725
TBGS5	Tibetan pig	62.4	CB24-4_1	Gansu	SRR9599726
TBGS6	Tibetan pig	72.6	CB24-1	Gansu	SRR9599739
TBTB1	Tibetan pig	65.8	CB21-4	Tibet	SRR9599712
TBTB2	Tibetan pig	65.4	CB23-6	Tibet	SRR9599713
TBTB3	Tibetan pig	68.2	CB21-3	Tibet	SRR9599740
TBTB4	Tibetan pig	66.2	CB21-6	Tibet	SRR9599741
TBTB5	Tibetan pig	74.2	CB21-2	Tibet	SRR9599746
TBTB6	Tibetan pig	61.1	CB21-1	Tibet	SRR9599747
TBTB7	Tibetan pig	78.2	CB21-5	Tibet	SRR9599764
TTGB1	Tibetan pig	70.4	BGI_TT_B12	Tibet Gongbujiangda	SRR949669,SRR949670
TTGB3	Tibetan pig	71.7	BGI_TT_B26	Tibet Gongbujiangda	SRR949681,SRR949682
TTGB2	Tibetan pig	65.6	BGI_TT_B40	Tibet Gongbujiangda	SRR949671,SRR949672
TTML1	Tibetan pig	57.3	BGI_TT_MLZ7	Tibet Milin	SRR949673,SRR949674,SRR949675
TTML2	Tibetan pig	54.7	BGI_TT_MLZ14	Tibet Milin	SRR949676,SRR949677,SRR949678
TTML3	Tibetan pig	58.9	BGI_TT_MLZ30	Tibet Milin	SRR949679,SRR949680
GSZ1	Tibetan pig	65.7	BGI_GST_R05	Gansu	SRR949714,SRR949713
GSZ2	Tibetan pig	65.9	BGI_GST_R02	Gansu	SRR949712,SRR949711
GSZ4	Tibetan pig	62.8	BGI_GST_R11	Gansu	SRR949710,SRR949709
GSZ3	Tibetan pig	70.4	BGI_GST_R06	Gansu	SRR949708,SRR949707
LTZ1	Tibetan pig	71.6	BGI_SCT_LTZ2016	Sichuan Litang	SRR949706,SRR949705
LTZ2	Tibetan pig	73.2	BGI_SCT_LTZ2011	Sichuan Litang	SRR949704,SRR949703
LTZ3	Tibetan pig	68	BGI_SCT_LTZ206	Sichuan Litang	SRR949700,SRR949699
LTZ4	Tibetan pig	68	BGI_SCT_LTZ203	Sichuan Litang	SRR949698,SRR949697
DQZ2	Tibetan pig	69.6	BGI_SCT_LTZ208	Sichuan Litang	SRR949701,SRR949702
LTZ5	Tibetan pig	69	BGI_SCT_LTZ201	Sichuan Litang	SRR949696,SRR949695
DQZ3	Tibetan pig	69	BGI_YNT_DQZ25	Yunan Diqing	SRR949694,SRR949693
DQZ4	Tibetan pig	72.6	BGI_YNT_DQZ19	Yunan Diqing	SRR949690,SRR949689
DQZ5	Tibetan pig	71.9	BGI_YNT_DQZ4	Yunan Diqing	SRR949688,SRR949687
DQZ6	Tibetan pig	60.7	BGI_YNT_DQZ26	Yunan Diqing	SRR949686,SRR949685
DQZ1	Tibetan pig	70.1	BGI_YNT_DQZ24	Yunan Diqing	SRR949691, SRR949692
DQZ7	Tibetan pig	73.3	BGI_YNT_DQZ12	Yunan Diqing	SRR949684,SRR949683

## Sheet: Supplemental_Table_S3
Supplemental Table S3. Sequencing data of European pigs downloaded from NCBI
Abbreviation	Full name	Size(Gb)	Individual	Location	Sequence Read Archive (SRA)
DR1	Duroc	96.1	G305f	Europe	SRR11568207
DR2	Duroc	98.3	G303f	Europe	SRR11568209
DR3	Duroc	67.6	G308f	Europe	SRR11568205
DR4	Duroc	103.1	G306f	Europe	SRR11568206
DR5	Duroc	102	G304f	Europe	SRR11568208
DLY1	Duroc x (Landrace x Yorkshire)	99	DLY6	Europe	SRR8362157
DLY2	Duroc x (Landrace x Yorkshire)	97.5	DLY3	Europe	SRR8362158
DLY3	Duroc x (Landrace x Yorkshire)	94.5	DLY5	Europe	SRR8327267
DLY4	Duroc x (Landrace x Yorkshire)	98.6	DLY2	Europe	SRR8327268
DLY5	Duroc x (Landrace x Yorkshire)	102.1	DLY1	Europe	SRR8284617
DLY6	Duroc x (Landrace x Yorkshire)	94.8	DLY4	Europe	SRR8284618
DLY7	Duroc x (Landrace x Yorkshire)	90.7	Blood-LY	Europe	SRR8270379
YS1	Landrace	90.4	Blood-Y	Europe	SRR8270380
LR1	Landrace	43.9	5624	Europe	SRR11475299
LR2	Landrace	37.8	5732	Europe	SRR11475294
LR3	Landrace	42.3	6368	Europe	SRR11475260
LR4	Landrace	36.7	115	Europe	SRR11475259
LR5	Landrace	38.4	114	Europe	SRR11475227
LRYS1	Landrace x Yorkshire	59.3	756	Europe	SRR9651210
LRYS2	Landrace x Yorkshire	59.2	750	Europe	SRR9651211
LRYS3	Landrace x Yorkshire	57.5	735	Europe	SRR9651223
LRYS4	Landrace x Yorkshire	54.1	693	Europe	SRR9651224
LRYS5	Landrace x Yorkshire	53.3	662	Europe	SRR9651226
LRYS6	Landrace x Yorkshire	56	690	Europe	SRR9651227
LRYS7	Landrace x Yorkshire	58.1	771	Europe	SRR9651229
LR6	Landrace	113.7	L401	Europe	SRR7686614
LR7	landrace	112	199790081	Europe	SRR4341337,SRR6252605
LR8	Landrace	70.5	199692650	Europe	SRR6252604,SRR4341334
LR9	Landrace	68.6	199691212	Europe	SRR4341323,SRR6252603
LR10	Landrace	121.6	199690232	Europe	SRR4341312,SRR6252602
LR11	Landrace	92.7	199690016	Europe	SRR4341301,SRR6252601
LR12	Landrace	73.6	199590673	Europe	SRR4341290,SRR6252600
LR13	Landrace	63.7	199590201	Europe	SRR4341279,SRR6252321
LR14	Landrace	90.1	199790341	Europe	SRR6252608,SRR4341270
LR15	Landrace	89.3	199590090	Europe	SRR6251675,SRR4341267
LR16	Landrace	83.8	199590172	Europe	SRR6252253,SRR4341268
LR17	Landrace	71.4	199790201	Europe	SRR4341269,SRR6252607
PTR1	Pietrain	64.2	17123	Europe	SRR9651202
PTR2	Pietrain	55.1	P115	Europe	SRR9651203
PTR3	Pietrain	56.4	P102	Europe	SRR9651204
PTR4	Pietrain	65.2	P107	Europe	SRR9651205
PTR5	Pietrain	65.7	17165	Europe	SRR9651206
PTR6	Pietrain	63.7	10345	Europe	SRR9651207
PTR7	Pietrain	63	17161	Europe	SRR9651208
PTR8	Pietrain	64.1	17118	Europe	SRR9651209
LR18	Landrace	130.8	LR18	Europe	SRX1544500,SRX1544499,SRX1544498,SRX1544487
PTR9	Pietrain	139.6	PTR9	Europe	SRX1544504,SRX1544503,SRX1544502,SRX1544501
HSH1	Hampshire	137.5	HSH1	Europe	SRX1544475,SRX1544462,SRX1544461,SRX1544460
BSH1	Berkshire	150.3	BSH1	Europe	SRX1544459,SRX1544458,SRX1544457,SRX1544434
YS2	Yorkshire	134.7	YS2	Europe	SRX1544508,SRX1544507,SRX1544506,SRX1544505
DR6	Duroc	93.4	Duroc_2	Europe	SRR7772140
DR7	Duroc	90.1	Duroc_1	Europe	SRR7772143
YS3	Yorkshire	61.1	PN71303001	Europe	SRR9599723
YS4	Yorkshire	54.7	13-164706	Europe	SRR9599727
YS5	Yorkshire	51.7	13-174808	Europe	SRR9599728
YS6	Yorkshire	55.9	13-137302	Europe	SRR9599729
YS7	Yorkshire	51.5	13-138206	Europe	SRR9599730
YS8	Yorkshire	53.7	13-119000	Europe	SRR9599731
YS9	Yorkshire	53.3	13-129500	Europe	SRR9599732
YS10	Yorkshire	42.8	12-496310	Europe	SRR9599733
YS11	Yorkshire	59.5	13-115204	Europe	SRR9599734
YS12	Yorkshire	53.7	PN71302850	Europe	SRR9599737
YS13	Yorkshire	60.3	HJ31302545	Europe	SRR9599742
YS14	Yorkshire	50.7	C311303434	Europe	SRR9599744
YS15	Yorkshire	70.1	C311303551	Europe	SRR9599745
YS16	Yorkshire	48.2	PN71302683	Europe	SRR9599748
YS17	Yorkshire	50.2	HJ31303029	Europe	SRR9599749
YS18	Yorkshire	60	PN71302730	Europe	SRR9599750
YS19	Yorkshire	65.4	PN71302725	Europe	SRR9599751
YS20	Yorkshire	53.4	C311304564	Europe	SRR9599752
YS21	Yorkshire	61.8	C311303637	Europe	SRR9599753
YS22	Yorkshire	54.1	12-406202	Europe	SRR9599754
YS23	Yorkshire	54	12-292402	Europe	SRR9599755
YS24	Yorkshire	51.3	12-287202	Europe	SRR9599756
YS25	Yorkshire	53.2	12-272206	Europe	SRR9599757
YS26	Yorkshire	60.5	12-271800	Europe	SRR9599758
YS27	Yorkshire	51.8	12-260300	Europe	SRR9599759
YS28	Yorkshire	54.5	12-248902	Europe	SRR9599760
YS29	Yorkshire	51.6	12-214404	Europe	SRR9599761
YS30	Yorkshire	49.5	12-205708	Europe	SRR9599762
YS31	Yorkshire	53.8	12-202700	Europe	SRR9599763
YS32	Yorkshire	58.3	12-189704	Europe	SRR9599765
YS33	Yorkshire	52.2	12-189604	Europe	SRR9599766
YS34	Yorkshire	49.7	HJ31303009	Europe	SRR9599767

## Sheet: Supplemental_Table_S4
Supplemental Table S4. Statistics of assemblies
Abbreviation	Individual	Full name	Assembled size(bp)	Mapping coverage	Region	Contig length (>= 0 bp)	Contig length (>= 1000 bp)	Contig length (>= 5000 bp)	Contig length (>= 10000 bp)	Contig length (>= 25000 bp)	Contig length (>= 50000 bp)	Total length (>= 0 bp)	Total length (>= 1000 bp)	Total length (>= 5000 bp)	Total length (>= 10000 bp)	Total length (>= 25000 bp)	Total length (>= 50000 bp)	Contig numbers	Largest contig	Total length	GC (%)	Contig N50	Contig N75	Contig L50	Contig L75	N's per 100 kbp
YDB3	JLBM1	Yuedonghei	2502847717	0.94633	Chinese	265893	197979	124678	80850	26534	5359	2502847717	2461770372	2271558582	1953229999	1087787343	368354946	244370	250231	2494280412	41.96	21703	11250	33382	73076	15.23
YDB2	F320	Yuedonghei	2508886833	0.94493	Chinese	205847	148381	101819	74412	32043	9129	2508886833	2474455725	2358092633	2156934374	1465858941	669150416	186975	370254	2501632505	41.98	30326	16016	24236	52472	20.94
YDB1	D310	Yuedonghei	2512207568	0.94393	Chinese	213337	152803	104053	75558	31916	8745	2512207568	2475783519	2354730804	2145957058	1435593690	632390697	194092	343319	2504980673	41.96	29385	15529	25160	54318	16.4
YDB4	s70	Yuedonghei	2514524591	0.9431	Chinese	244369	177817	116144	79562	29108	6798	2514524591	2474055964	2317463963	2050277015	1239431620	473815837	224951	282163	2506999879	41.94	24711	12901	29674	64631	17.53
YS1	SBlood_Y	Yorkshire	2400800308	0.93592	European	88618	71230	56810	47968	30859	15836	2400800308	2392287870	2355698562	2290506324	2004629342	1465260444	78142	562873	2397211431	41.82	64124	34265	11122	23842	169.24
YS35	DB_1	Yorkshire	2485099442	0.94512	European	119701	85421	62262	51480	31512	15420	2485099442	2465881857	2413463646	2334025361	2000651201	1425142422	106188	642838	2481247617	41.93	59795	30808	12050	26488	27.5
YS36	DB_2	Yorkshire	2487543875	0.94551	European	115848	76907	53813	45494	29463	16081	2487543875	2466266523	2416750864	2355814672	2086950561	1606106189	98796	737113	2482264682	41.97	71902	36427	9999	22051	26.14
YS10	YS10	Yorkshire	2270869103	0.93423	European	314819	276457	145020	73395	13066	1159	2270869103	2246901664	1891378008	1378773200	460767417	71945453	301837	147559	2266390442	41.58	12804	6788	51671	112260	677.89
YS11	YS11	Yorkshire	2383922111	0.93483	European	162916	144307	102555	72615	29636	8367	2383922111	2373371865	2259367321	2040564968	1345249896	609082881	154900	370713	2381178191	41.77	28942	15259	23883	52146	263.98
YS12	YS12	Yorkshire	2354857410	0.93628	European	225228	200766	128009	79313	22773	3879	2354857410	2340525103	2140378710	1787445253	895033001	257859022	215209	202195	2351468740	41.75	19408	10332	35540	76968	357.15
YS13	YS13	Yorkshire	2379897313	0.93525	European	184933	165252	114752	77831	27601	6051	2379897313	2368499402	2229130226	1959225263	1152453654	416488354	176871	248731	2377114932	41.81	24181	13026	29070	62420	256.83
YS14	YS14	Yorkshire	2340584370	0.93374	European	251728	222491	134772	78842	20049	2924	2340584370	2323184661	2082231702	1678148955	759573553	187701478	240391	168665	2336709387	41.75	17132	9067	39929	86656	446.02
YS15	YS15	Yorkshire	2391509339	0.93606	European	177816	155930	110194	76379	28873	6895	2391509339	2379218195	2254247035	2006573398	1239920286	484612555	168076	267782	2388222784	41.81	26006	13999	27076	58277	214.26
YS16	YS16	Yorkshire	2303380201	0.93459	European	289518	254860	138057	74702	16780	2131	2303380201	2281531881	1966923321	1511974215	620203568	134915336	278357	182887	2299512980	41.51	14706	7611	44803	99039	491.97
YS17	YS17	Yorkshire	2323933118	0.93481	European	282647	251881	142620	77782	16324	1797	2323933118	2304587571	2006826106	1539994831	591694201	112651115	272698	175312	2320512787	41.71	14674	7820	46415	100413	424.81
YS18	YS18	Yorkshire	2389920117	0.93568	European	142027	125435	92833	68775	31399	10068	2389920117	2380745456	2291987204	2115694520	1504459843	760816827	134400	290215	2387300416	41.79	33744	17896	20683	44892	240.51
YS19	YS19	Yorkshire	2389044728	0.93754	European	162737	143157	103028	73534	30296	8164	2389044728	2378347735	2269052653	2053267822	1351664051	587087932	153395	255464	2385917721	41.8	28880	15451	24390	52526	246.84
YS20	YS20	Yorkshire	2347752457	0.93438	European	251448	225200	137681	80447	19565	2498	2347752457	2331705694	2090868519	1676411707	726486874	159258214	242155	159802	2344564191	41.8	16701	9035	41548	89069	362.35
YS21	YS21	Yorkshire	2394914186	0.93555	European	170782	148928	105817	74853	29807	7632	2394914186	2382660111	2265796729	2039373396	1309518024	544100965	161127	301482	2391607047	41.83	27660	14857	25482	54841	235.74
YS22	YS22	Yorkshire	2373691231	0.93512	European	177398	157343	110501	76363	28436	6619	2373691231	2362542684	2233974732	1984210976	1211637512	462590385	168111	229077	2370573145	41.85	25610	13768	27395	58871	349.68
YS23	YS23	Yorkshire	2363512118	0.93435	European	201314	180724	120832	78688	25488	5013	2363512118	2351405964	2185789539	1878997669	1030508238	336244893	193105	206486	2360714868	41.79	21859	11695	31907	68667	343.32
YS24	YS24	Yorkshire	2355176653	0.93597	European	200977	178772	117873	76572	25584	5468	2355176653	2342381561	2175332622	1875151794	1063006177	376670890	191399	231063	2351932385	41.7	22500	11794	30350	66344	382.7
YS25	YS25	Yorkshire	2364319065	0.93441	European	205945	182602	120386	77973	25220	5111	2364319065	2350722072	2179666082	1871211088	1032139763	349138502	196454	210675	2361073097	41.78	21815	11557	31585	68637	360.52
YS26	YS26	Yorkshire	2386899963	0.93504	European	166800	145541	104315	74209	30025	7987	2386899963	2375209249	2262955176	2042642323	1327922972	566423576	156891	268165	2383552601	41.8	28277	15103	24903	53630	251.3
YS27	YS27	Yorkshire	2356856812	0.93455	European	196881	176860	117724	76651	25640	5623	2356856812	2345220489	2182145645	1883128450	1069737093	386023937	188532	221825	2354019439	41.72	22655	11893	30149	65866	388.65
YS28	YS28	Yorkshire	2372408218	0.93602	European	184205	163562	112567	76683	27702	6420	2372408218	2360663094	2221061761	1958921353	1172149727	444759804	175283	290855	2369415281	41.78	24686	13212	28208	60917	312.03
YS29	YS29	Yorkshire	2352167831	0.93717	European	209018	186756	121480	77708	24519	4897	2352167831	2339387532	2160161102	1842053323	997247205	331055197	199334	265013	2348942453	41.72	21213	11233	32224	70135	405.62
YS3	YS3	Yorkshire	2388058340	0.93713	European	157420	139067	100083	71733	30221	8754	2388058340	2377746878	2272071902	2064783791	1390381321	645543509	149364	277465	2385300933	41.78	30198	15942	23017	50131	241.09
YS30	YS30	Yorkshire	2312823404	0.93613	European	274742	244165	138163	76254	17521	2288	2312823404	2293794954	2005151790	1560038202	651827404	145919050	264151	180242	2309168655	41.59	15337	8033	43476	95412	483.41
YS31	YS31	Yorkshire	2373541596	0.93679	European	172680	153081	107095	74119	28758	7482	2373541596	2362628977	2236726562	1995866020	1264054801	530894813	163665	303698	2370511863	41.76	26884	14230	25719	55948	330.88
YS32	YS32	Yorkshire	2374584301	0.93578	European	190366	169691	116541	78222	27137	5559	2374584301	2362667144	2216425014	1936854513	1117446054	380798408	181763	244444	2371636361	41.8	23527	12633	29958	64175	290.48
YS33	YS33	Yorkshire	2360827481	0.9351	European	203993	183110	121167	78270	25190	4908	2360827481	2348477764	2177682622	1865944250	1021924721	333457022	195768	218751	2358008195	41.76	21677	11477	31940	69177	361.27
YS34	YS34	Yorkshire	2209178771	0.93469	European	472138	404063	153036	52280	3195	82	2209178771	2163866767	1504235917	796659852	100455159	4727947	453960	89216	2202826814	42.13	7541	4168	87468	185407	541.89
YS4	YS4	Yorkshire	2371666094	0.93551	European	191718	169046	115531	77715	26946	5906	2371666094	2358810573	2212394156	1936549390	1122618384	403607902	181785	243518	2368317217	41.8	23641	12699	29477	63518	323.45
YS5	YS5	Yorkshire	2357444624	0.93598	European	203644	182304	120086	77612	25200	5175	2357444624	2344868313	2173616721	1864994723	1033358635	352885156	195200	259766	2354573697	41.74	21847	11516	31361	68388	386.33
YS6	YS6	Yorkshire	2368810059	0.93303	European	183781	163030	111859	75331	27548	6620	2368810059	2356980676	2216651275	1949870638	1182849405	464740614	174705	214378	2365714406	41.74	24998	13149	27549	60081	354.88
YS7	YS7	Yorkshire	2351239948	0.93458	European	213433	191372	123084	77752	24089	4635	2351239948	2337894082	2150634022	1821632189	972616400	312222295	205430	217241	2348477777	41.7	20656	10903	32977	71978	372.39
YS8	YS8	Yorkshire	2360594338	0.93543	European	210504	189016	124591	79629	24392	4326	2360594338	2347855319	2169788181	1842782930	965000042	287250432	202036	196497	2357696938	41.79	20649	11102	33810	72559	352.63
YS9	YS9	Yorkshire	2374787975	0.93631	European	178928	158534	110534	76042	28238	6754	2374787975	2363385773	2232100538	1980009108	1210943210	472494700	169687	268929	2371708351	41.79	25568	13657	27246	58911	315.76
WZS2	BGI_WZS_WZS809	Wuzhishan	2376049122	0.93353	Chinese	134675	110085	77416	58051	30037	12444	2376049122	2363242173	2277609520	2136430253	1677495207	1056774909	121642	415513	2371595937	41.54	43972	21688	15200	34380	250.95
WZS6	BGI_WZS_WZS973	Wuzhishan	2381574726	0.93241	Chinese	119274	97403	70954	54988	30411	13485	2381574726	2370157397	2300915744	2184427539	1780862369	1181067691	108025	532289	2377797785	41.59	49580	24887	13643	30511	244.98
WZS3	BGI_WZS_WZS889	Wuzhishan	2381747242	0.93395	Chinese	126866	103907	75373	57714	30877	12929	2381747242	2369605783	2294660544	2165635844	1725872056	1090786400	115626	466004	2377957363	41.6	45437	23045	14990	33277	236.57
WZS1	BGI_WZS_WZS149	Wuzhishan	2385202409	0.93258	Chinese	121343	100095	74893	58117	30942	13067	2385202409	2374433289	2307639837	2184644033	1738290859	1104587958	109505	468911	2381172821	41.67	46015	23418	14860	32909	245.33
WZS4	BGI_WZS_WZS947	Wuzhishan	2390124090	0.93707	Chinese	137339	111506	79986	59965	30419	12352	2390124090	2376893099	2293688012	2147391830	1664531981	1026065284	122958	391809	2385165166	41.66	42582	21041	15957	35833	245.54
WZS5	BGI_WZS_WZS955	Wuzhishan	2391914396	0.93699	Chinese	135264	110350	79942	60431	30776	12327	2391914396	2379168150	2298403262	2155805617	1670470897	1020639938	121486	391822	2387181878	41.67	42198	21185	16100	35981	249.59
WZS7	WZ_1	Wuzhishan	2485930111	0.94903	Chinese	131208	96476	70992	57349	32615	14418	2485930111	2465936448	2405635499	2305392310	1893399829	1246160345	118316	460848	2481848340	41.94	50240	26101	14314	31363	29.93
WZS8	WZ_2	Wuzhishan	2486117171	0.949	Chinese	130088	94870	69896	56500	32429	14563	2486117171	2466204971	2407413631	2308697865	1908258328	1271711456	116586	522063	2481967602	41.94	51467	26758	13958	30622	24.02
TCH2	s68	Tunchang	2502610743	0.94135	Chinese	261774	193845	124241	81541	26870	5388	2502610743	2461712964	2280843713	1970018273	1098718908	367402055	240483	289490	2494215232	41.93	21903	11532	33216	72293	11.65
TCH1	s2007	Tunchang	2510546756	0.9467	Chinese	187463	137082	95026	70628	32430	10563	2510546756	2479853278	2375500193	2196462927	1572388362	808589863	172897	365674	2505052908	41.98	33862	17594	21431	47003	8.38
DQZ6	BGI_YNT_DQZ26	Tibetan	2300956259	0.93991	Chinese	225064	193116	116680	73293	23845	4977	2300956259	2283418691	2079117028	1765198647	982038821	338631568	209342	231402	2295703292	41.34	21184	10688	31053	69092	706.47
TTML2	BGI_TT_MLZ14	Tibetan	2324968901	0.93543	Chinese	176888	150023	96515	65860	27694	8825	2324968901	2310237206	2167702072	1945418445	1332354026	673980053	163817	359919	2320483570	41.38	30285	14616	21444	48964	611.17
TTML3	BGI_TT_MLZ30	Tibetan	2328011898	0.93196	Chinese	170432	147017	97798	67671	28238	8649	2328011898	2315309921	2183181678	1964249190	1328928418	648893629	158844	343051	2324086700	41.41	29746	14897	22117	49619	574.43
TTML1	BGI_TT_MLZ7	Tibetan	2337647033	0.93366	Chinese	172991	147291	95640	65853	28278	9080	2337647033	2323556232	2186691792	1970378330	1366367594	697252337	160662	345616	2333426965	41.4	31018	15073	21106	47975	486.18
GSZ4	BGI_GST_R11	Tibetan	2344942901	0.92907	Chinese	171766	145669	96281	67815	29235	8895	2344942901	2330274305	2201090233	1993976009	1369085732	660668364	159868	342800	2340869719	41.39	30674	15463	22058	48818	330.52
GSZ2	BGI_GST_R02	Tibetan	2348248325	0.93173	Chinese	176777	145928	92789	64516	28657	9658	2348248325	2331144190	2193301713	1988354276	1411294203	748192536	162034	331495	2343175271	41.35	32495	15593	20231	46134	355.43
GSZ1	BGI_GST_R05	Tibetan	2352859083	0.92926	Chinese	170763	144602	96746	68425	29376	8884	2352859083	2338245735	2212319122	2006048346	1373069809	658366607	158525	313669	2348647656	41.45	30663	15565	22196	49001	306.3
GSZ3	BGI_GST_R06	Tibetan	2367570480	0.93246	Chinese	135129	112697	77303	58151	30321	12452	2367570480	2355394480	2264413491	2124696979	1669032366	1036945326	124063	547419	2363840651	41.5	43508	21509	15562	34793	236.68
LTZ4	BGI_SCT_LTZ203	Tibetan	2376517681	0.9351	Chinese	151707	128016	92422	68451	31374	9983	2376517681	2364280749	2268590762	2093041525	1486737444	741528234	138592	288135	2372036488	41.64	33410	17700	20955	45229	246.23
LTZ5	BGI_SCT_LTZ201	Tibetan	2383372583	0.93322	Chinese	114247	94888	70212	55006	30800	13735	2383372583	2373433430	2308589593	2197138862	1796936964	1191540051	103640	465929	2379770505	41.65	50091	25421	13702	30320	202.18
DQZ2	BGI_SCT_LTZ208	Tibetan	2383478255	0.93899	Chinese	149462	125084	88991	65451	30874	10779	2383478255	2370648382	2274509904	2102445820	1538679465	833706207	136871	299102	2379165198	41.65	35879	18317	19221	42341	245.83
TTGB2	BGI_TT_B40	Tibetan	2384873363	0.93638	Chinese	127856	104736	74238	56323	30059	13046	2384873363	2372800426	2293529420	2162954119	1733346439	1130364404	115601	488330	2380684529	41.6	47012	23112	14284	32229	243.42
TTGB1	BGI_TT_B12	Tibetan	2385088679	0.93384	Chinese	117218	98734	74739	58242	31458	13218	2385088679	2375592854	2311949973	2190629521	1749105752	1104130321	107216	481424	2381709937	41.68	46010	23742	15026	32985	234.51
LTZ3	BGI_SCT_LTZ206	Tibetan	2386430749	0.93834	Chinese	138779	114441	81915	61160	30701	12085	2386430749	2373816192	2287791263	2136272255	1638871470	983056259	125688	370974	2381964464	41.64	40910	20404	16685	37234	243.61
DQZ7	BGI_YNT_DQZ12	Tibetan	2387478547	0.93921	Chinese	152707	127053	89048	64923	30413	10773	2387478547	2373942692	2272799438	2096974557	1535500967	847829111	139501	357347	2382946438	41.64	35898	18100	18919	42218	220.49
LTZ1	BGI_SCT_LTZ2016	Tibetan	2387481775	0.93633	Chinese	124009	101206	71588	54778	29963	13522	2387481775	2375639310	2299201281	2176673474	1769514284	1186529900	111608	536800	2383255431	41.6	49728	24288	13625	30691	212.92
LTZ2	BGI_SCT_LTZ2011	Tibetan	2390354910	0.93834	Chinese	155018	130233	93037	68018	30893	10076	2390354910	2377409576	2277386241	2094298717	1489985406	762635303	141913	414962	2385874081	41.7	33592	17402	20639	45212	210.09
DQZ1	BGI_YNT_DQZ24	Tibetan	2396393437	0.94088	Chinese	122590	99241	72973	56578	30877	13369	2396393437	2384478575	2316132625	2195815308	1773248404	1154627699	109977	443701	2392099420	41.73	47943	24285	14215	31723	256.23
DQZ3	BGI_YNT_DQZ25	Tibetan	2397309944	0.93955	Chinese	126282	102398	74903	57651	30818	13175	2397309944	2385043238	2313517368	2187186773	1747047715	1124027287	113445	420303	2392925460	41.72	46427	23335	14678	32791	240.92
TTGB3	BGI_TT_B26	Tibetan	2398566979	0.9387	Chinese	123894	102680	76318	59346	31351	13057	2398566979	2387663787	2317968774	2193313076	1732799589	1085788360	112463	520113	2394649425	41.75	45018	22997	15410	33988	212.39
DQZ4	BGI_YNT_DQZ19	Tibetan	2400120303	0.93923	Chinese	127642	103065	76158	58790	31183	13067	2400120303	2387543522	2317226397	2189778078	1736491667	1096035223	114247	370005	2395496509	41.75	45209	22972	15206	33693	220.06
DQZ5	BGI_YNT_DQZ4	Tibetan	2402605904	0.93796	Chinese	128962	103353	76092	58638	31160	13066	2402605904	2389592273	2318304387	2190245698	1739158065	1099621628	114716	406459	2397708724	41.75	45358	23088	15148	33620	214.21
TBGS1	TBGS1	Tibetan	2413678302	0.94446	Chinese	453323	374345	164619	68039	6984	288	2413678302	2362875744	1806207176	1121614072	226803692	17034749	431849	104079	2405181527	41.94	9309	5014	76434	164156	50.46
TBGS2	TBGS2	Tibetan	2412264049	0.94147	Chinese	383230	322691	162327	76150	10049	541	2412264049	2373495860	1940801161	1324394313	335176520	32370083	366681	113525	2405805516	41.92	11136	6054	64635	137571	69.13
TBGS3	TBGS3	Tibetan	2421526197	0.94382	Chinese	370695	311949	159183	77446	11606	763	2421526197	2384031892	1973054240	1387502166	395252814	46008043	354586	147926	2415306163	41.92	11767	6326	60867	130517	66
TBGS4	TBGS4	Tibetan	2401294613	0.94245	Chinese	473001	389733	163861	64867	6087	216	2401294613	2347523428	1752557189	1052463835	195488701	12708606	450627	120931	2392402206	41.89	8814	4741	80179	172437	54.72
TBGS5	TBGS5	Tibetan	2384050990	0.93858	Chinese	516578	424291	164491	57951	3831	100	2384050990	2324218945	1640979316	891298263	120179991	5872504	492187	93886	2374274521	41.96	7749	4246	91638	194802	54.06
TBGS6	TBGS6	Tibetan	2417032550	0.94538	Chinese	333966	284925	154114	80138	14117	1204	2417032550	2385409936	2032516988	1501199791	494182339	73834158	320886	146805	2411939758	41.94	13160	7052	54399	116649	85.53
TBSC2	TBSC2	Tibetan	2405338328	0.9437	Chinese	362638	309043	157938	76807	11772	823	2405338328	2370926712	1963618098	1383206554	402169813	50338656	347828	167435	2399596519	41.94	11839	6350	59941	128923	87.99
TBSC3	TBSC3	Tibetan	2416179719	0.94668	Chinese	410064	343463	163093	72975	8943	465	2416179719	2373161755	1890982754	1248861698	297353445	28017730	392657	137706	2409349383	41.96	10408	5611	68645	147257	66.09
TBSC4	TBSC4	Tibetan	2408104098	0.94328	Chinese	429849	359485	163104	70143	7822	376	2408104098	2362674874	1839488791	1178751329	257791163	22920456	411036	250446	2400625714	41.89	9810	5266	72320	155502	59.24
TBSC5	TBSC5	Tibetan	2422604384	0.94594	Chinese	414093	345513	163677	73031	8738	496	2422604384	2378682489	1892653217	1246901707	290985307	29855899	395433	182752	2415348227	41.96	10363	5573	69178	148319	60.36
TBSC6	TBSC6	Tibetan	2409425793	0.94442	Chinese	441419	366250	163681	69290	7305	358	2409425793	2361052515	1823678392	1153193443	240538290	21214707	421055	126599	2401405250	41.94	9594	5151	74142	159223	62.15
TBTB1	TBTB1	Tibetan	2398275739	0.94506	Chinese	542588	436313	162389	56261	3987	144	2398275739	2329686381	1617588769	872822678	127839716	8620524	513966	122021	2386799567	42.05	7539	4082	93290	200517	60.65
TBTB2	TBTB2	Tibetan	2394786234	0.94298	Chinese	387729	331210	160383	73550	9852	597	2394786234	2357925063	1899392056	1280277736	331520726	35776932	373303	124326	2389146523	41.9	10791	5808	65300	140443	80.06
TBTB3	TBTB3	Tibetan	2404654937	0.94573	Chinese	461902	382302	164280	66150	6378	295	2404654937	2353084958	1775737207	1081358405	208239957	17727233	441159	127660	2396419561	41.97	9022	4862	78461	168658	66.71
TBTB4	TBTB4	Tibetan	2399483688	0.93965	Chinese	420226	352895	164665	71125	7708	288	2399483688	2356096552	1852685226	1187488476	250999343	17024783	402268	92287	2392402267	41.88	9927	5400	72000	153429	73.5
TBTB5	TBTB5	Tibetan	2415359275	0.94581	Chinese	460810	381203	164378	66480	6780	363	2415359275	2363623267	1789349922	1096373869	224193979	22262311	440382	162745	2407257433	42.03	9087	4900	77735	167630	64.07
TBTB6	TBTB6	Tibetan	2398856390	0.94461	Chinese	491743	402144	163912	62752	5273	182	2398856390	2340967372	1714749243	1000623968	169180580	11027539	467793	112448	2389255978	41.96	8419	4549	83905	180094	71.75
TBTB7	TBTB7	Tibetan	2425857610	0.94433	Chinese	382215	321210	160780	76341	10947	666	2425857610	2386825295	1956402470	1352878258	370679174	40453624	365773	153025	2419534754	41.92	11369	6121	62919	135203	54.87
TBYN1	TBYN1	Tibetan	2421571742	0.94619	Chinese	385240	324355	161059	75780	10476	706	2421571742	2382365503	1944180301	1334394305	355852974	42583217	369105	186483	2415301106	41.96	11197	6041	63804	136952	72.61
TBYN2	TBYN2	Tibetan	2413197713	0.94581	Chinese	423398	352155	163052	71182	8482	437	2413197713	2367282256	1862320516	1208377069	280371519	26644115	404247	120983	2405639562	41.96	10052	5413	70628	151887	71.06
TBYN3	TBYN3	Tibetan	2405574005	0.94606	Chinese	403489	335254	159141	72860	10177	618	2405574005	2361712171	1894511936	1279451313	343141504	37136254	385081	136065	2398388396	41.82	10752	5723	65121	141261	76.47
TBYN4	TBYN4	Tibetan	2418638519	0.94598	Chinese	426563	352559	163155	71567	8452	395	2418638519	2371257925	1866812705	1215009458	279374835	23647088	406448	122964	2410744326	41.88	10088	5417	70608	151865	54.98
TBYN5	TBYN5	Tibetan	2394162116	0.9444	Chinese	439232	366941	162787	68122	7258	362	2394162116	2347016550	1805687362	1133384811	240146541	22178693	420960	133970	2386891805	42.01	9486	5104	74290	159715	93.75
TBYN6	TBYN6	Tibetan	2403862699	0.94521	Chinese	471119	387145	164261	65510	6128	212	2403862699	2349660253	1761803477	1062811215	197371009	12687708	448622	117470	2394919390	41.93	8891	4787	79803	171288	70.19
SB2	SBF60	Saba	2499011377	0.94316	Chinese	234475	172283	114626	78472	29330	6972	2499011377	2461831765	2312368702	2048868500	1258748551	491048563	214082	323639	2491026368	41.95	25309	13158	28804	62787	10.81
SB1	SBF55	Saba	2510538018	0.94262	Chinese	245836	178806	118534	80958	28854	6231	2510538018	2470869019	2315217898	2040693252	1202718188	428609211	222636	252319	2501512190	41.96	23985	12733	30816	66395	12.72
SB3	s85	Saba	2524178157	0.94777	Chinese	221621	154911	103712	74942	31447	9113	2524178157	2484002379	2358072937	2148005225	1441133729	665991361	200727	321663	2516173644	41.95	29634	15336	24719	54090	10.67
SB4	S_1	Saba	2480126515	0.94909	Chinese	121922	88655	65510	53731	31943	15032	2480126515	2460954970	2407424148	2320492638	1957319143	1353112112	109720	711883	2476407557	41.92	55764	29009	12856	28236	29.24
SB5	S_2	Saba	2484658156	0.9488	Chinese	127387	91420	66628	54387	32180	14869	2484658156	2463860476	2406655748	2316717674	1946887742	1329371678	114317	493132	2480636817	41.93	54365	28294	13161	28934	24.6
PT1	PTHF7	Putian	2499567623	0.94132	Chinese	260474	190464	122349	80611	27079	5740	2499567623	2457690518	2280887689	1976815353	1123744184	397373649	237665	286448	2490601363	41.95	22449	11661	32215	70537	10.84
PT3	s6280	Putian	2502712805	0.94302	Chinese	186528	134502	94756	71190	32977	10558	2502712805	2471521787	2373479522	2200507550	1574602649	790067616	169792	371488	2496429056	41.97	33854	17860	21755	47026	15.75
PT2	s52	Putian	2507186502	0.94504	Chinese	210733	155736	105956	75397	31058	8612	2507186502	2473759580	2347720406	2124181528	1406096706	629670020	194432	331099	2500973179	41.94	28794	14984	25260	55217	11.34
PTR2	SP115	Pietrain	2397041677	0.9405	European	92624	76621	60176	50078	30862	15374	2397041677	2390777710	2348828791	2274546770	1953612383	1398874712	82262	634648	2394839171	41.82	60089	31875	11702	25298	134.58
PTR3	SP102	Pietrain	2401148953	0.94021	European	82784	68553	54081	45935	30017	15987	2401148953	2395517111	2359174428	2299139031	2032038109	1527689940	73604	570897	2399138081	41.84	68761	36313	10383	22346	92.8
PTR1	S17123	Pietrain	2402626169	0.94338	European	100741	81825	59471	47508	29061	15007	2402626169	2394845307	2337694494	2250532274	1945582635	1443684584	88896	548172	2399968328	41.77	64197	31838	10704	23916	160.92
PTR7	S17161	Pietrain	2404527742	0.94396	European	94459	75769	55917	45406	28646	15349	2404527742	2396907261	2346393583	2269756867	1992931439	1516549223	82610	730324	2401841119	41.78	69340	34724	9996	22168	159.61
PTR8	S17118	Pietrain	2405649985	0.94426	European	93329	74965	55389	44915	28368	15467	2405649985	2398359740	2348569738	2272057391	1999011562	1535381538	81490	723053	2403055104	41.81	70869	35529	9864	21786	135.03
PTR4	SP107	Pietrain	2405925697	0.94207	European	86299	69723	54605	46187	30143	16026	2405925697	2399534680	2361935958	2299954669	2030776513	1523187899	75281	567880	2403489510	41.82	67943	36018	10518	22601	105.89
PTR6	S10345	Pietrain	2407302997	0.94346	European	102346	84213	62329	49909	30022	15124	2407302997	2399612665	2343442050	2253017354	1924277452	1391868739	91272	456166	2404702305	41.82	60224	30416	11676	25652	119.19
PTR5	S17165	Pietrain	2410326433	0.94488	European	108904	89406	66502	52679	30779	14712	2410326433	2401916899	2342831053	2241829259	1880519385	1306277244	97130	424084	2407515091	41.84	55174	28132	12761	27955	94.25
PTR9	Pietrain	Pietrain	#N/A	#N/A	European	88436	14251	4221	3664	3121	2718	2438316299	2407642639	2391295401	2387410346	2378453042	2363672078	36585	9963048	2422850555	41.83	1667343	839005	422	926	961.23
MBS1	MBH16F	Minbeihua	2488279161	0.9437	Chinese	165531	120314	85918	65875	32634	11917	2488279161	2460496880	2375788443	2228687000	1682205908	952765121	153410	489565	2483791955	41.95	38704	20059	18507	40685	8.02
MBS2	s59	Minbeihua	2504267970	0.94574	Chinese	234342	172171	114999	78548	29065	7082	2504267970	2466959879	2318795373	2052254177	1255919372	502181171	214687	282706	2496503416	41.95	25168	13155	28760	62911	10.89
MBS3	MBH3M	Minbeihua	2510409031	0.94633	Chinese	188227	136729	96097	71860	33016	10427	2510409031	2479432382	2379148305	2201263785	1564428300	774249676	172058	302152	2504481860	41.95	33364	17615	22216	47959	11.48
MZ3	BGI_MIN_MZhu3134	Min	2366403987	0.93296	Chinese	165047	138662	90624	64109	29241	10349	2366403987	2351580389	2226954947	2034184091	1470478734	809132859	153154	438400	2362318463	41.48	34335	16675	19353	43956	232.43
MZ1	BGI_MIN_MZ_304_07	Min	2366526812	0.93154	Chinese	149119	125186	87127	64047	30553	10866	2366526812	2353740922	2253828111	2085541868	1539725226	848172430	136809	396696	2362317911	41.5	36612	18444	18678	41335	285.19
MZ4	BGI_MIN_MZhu3252	Min	2367713106	0.93205	Chinese	139889	120734	84627	62827	30910	11444	2367713106	2357264294	2261973823	2103038496	1581575786	896349114	130552	403104	2364575941	41.56	38247	19368	17992	39612	266.72
MZ2	BGI_MIN_MZ_307_00	Min	2376738997	0.93438	Chinese	143740	119241	81555	60145	29987	11870	2376738997	2363340392	2265523365	2109540567	1617692445	980366522	132110	460320	2372757364	41.53	40615	19903	16445	37230	235.07
MZ5	BGI_MIN_MZhu3312	Min	2383230349	0.93511	Chinese	146813	123827	87240	64270	30851	11021	2383230349	2371065342	2274118994	2106461828	1561483985	865789150	134973	404618	2379212174	41.63	36866	18711	18589	41129	217.57
MZ6	BGI_MIN_MZhu3126	Min	2395760722	0.93762	Chinese	113523	92717	68767	53801	29963	13772	2395760722	2384969699	2322790718	2213284362	1820838092	1246890298	102622	521651	2392016101	41.72	52715	25988	12781	28911	251.7
MZ7	C1	Min	2480227074	0.94581	Chinese	119356	84727	61199	50897	31217	15582	2480227074	2460659388	2407866967	2331916874	2002824794	1444041680	105831	635507	2476105803	41.94	60706	31227	11846	26011	30.44
MZ8	C2	Min	2484530881	0.94576	Chinese	129089	93427	68627	55878	32726	14768	2484530881	2464091790	2407102525	2313702311	1928657744	1288761156	115763	459718	2480398511	41.95	52252	27469	13818	30118	29.49
LC6	BGI_LUC_LUC201	Luchuan	2333929723	0.92695	Chinese	155234	129526	84063	60526	29103	11003	2333929723	2319645660	2202243086	2031384935	1521901861	885380562	143069	359165	2329768680	41.21	37661	18097	17462	39692	324.55
LC5	BGI_LUC_LUC207	Luchuan	2366581282	0.93129	Chinese	134835	111476	76372	57220	30048	12665	2366581282	2354161354	2263547307	2124212842	1679323748	1066150546	122484	435496	2362358108	41.49	44379	21818	15108	34001	221.51
LC1	BGI_LUC_LUC2016	Luchuan	2368743009	0.93413	Chinese	139333	117006	79493	58168	29219	12021	2368743009	2356733637	2258221628	2103333866	1633107402	1026724598	128221	458277	2364937521	41.55	42568	20311	15408	35447	297.22
LC4	BGI_LUC_LUC208	Luchuan	2381567245	0.93359	Chinese	113877	94552	69757	54346	30130	13651	2381567245	2371854044	2306502928	2193583281	1795373873	1211452447	102723	445073	2377799327	41.65	51162	25457	13206	29654	229.87
LC2	BGI_LUC_LUC206	Luchuan	2382823904	0.9344	Chinese	126290	106030	76580	57852	30180	12581	2382823904	2372349310	2294372391	2157303083	1705173656	1082976799	115314	513546	2379074063	41.68	45005	22350	14828	33525	244.8
LC3	BGI_LUC_LUC202	Luchuan	2388880343	0.9344	Chinese	129998	110790	82466	62813	31563	11963	2388880343	2378804581	2303044711	2158607499	1644848744	955344295	120135	375381	2385511357	41.72	40022	20808	17277	37880	216.57
LONGL3	LL7839	Longlin	2503802528	0.94394	Chinese	249107	181859	118584	80070	28264	6271	2503802528	2463366894	2300669406	2020030689	1188214381	435406590	227418	249810	2495330361	41.95	23714	12468	30707	66791	13.24
LONGL2	LL7105	Longlin	2513554609	0.94451	Chinese	224160	162649	109169	77010	30781	8134	2513554609	2476239909	2341430657	2105852027	1357489250	576501369	205657	370276	2506384684	41.99	27441	14340	26800	58241	12.42
LONGL1	LL0012	Longlin	2521148511	0.94645	Chinese	227585	166119	110851	77850	30529	7853	2521148511	2484119593	2344364826	2103420127	1338570543	556900744	208548	260141	2513866516	41.97	26906	14034	27382	59527	13.2
YS2	Large_White	Large_White	#N/A	#N/A	European	102342	15398	3112	2665	2222	1938	2457907103	2421604851	2401428760	2398264399	2391031457	2380733216	42250	11394010	2439941470	41.85	2446755	1252466	305	655	1108.53
LTA1	B14202	Lantang	2482901419	0.94246	Chinese	245845	184022	120728	80300	27412	5874	2482901419	2446080804	2279882244	1984853372	1139162893	405208598	225030	263358	2474790045	41.93	22942	12043	31516	68584	13.6
LTA2	B27702	Lantang	2485336308	0.94195	Chinese	250916	188641	122265	80447	26862	5710	2485336308	2448005516	2273180069	1968467881	1114719115	393816860	230242	318837	2477185432	41.93	22375	11697	32101	70235	14.59
LTA3	MB1205	Lantang	2494053410	0.94457	Chinese	233915	175210	115523	78707	28689	6875	2494053410	2458971657	2304082927	2035554761	1230487628	483575490	214150	272905	2486351377	41.96	24715	12980	29200	63745	14.89
LTA4	LT_1	Lantang	2479049450	0.94626	Chinese	124362	89283	66213	54281	32397	15138	2479049450	2458867029	2405873829	2318012855	1953009142	1337585479	111504	477717	2475066717	41.94	54787	28702	13227	28792	22.9
LTA5	LT_2	Lantang	2483170028	0.94658	Chinese	139834	101235	73975	59445	33275	13983	2483170028	2460631838	2396902484	2289930144	1855082354	1171176050	126297	420576	2478918640	41.94	47088	24874	15391	33440	29.29
LRYS5	S662	Landrace x Yorkshire	2391835494	0.94025	European	91239	77118	60720	50557	31335	15312	2391835494	2385455683	2343685931	2268715794	1947134633	1373761353	83006	548014	2389688058	41.81	59026	31486	12019	25824	178.18
LRYS4	S693	Landrace x Yorkshire	2395155030	0.94158	European	87122	72738	57540	48396	30728	15563	2395155030	2388842467	2350094725	2282811737	1986274454	1442093836	78541	479663	2392989480	41.82	63077	33619	11184	24148	158.39
LRYS7	S771	Landrace x Yorkshire	2397973175	0.9402	European	88153	72688	57312	48088	30603	15665	2397973175	2391471941	2352482135	2284423683	1991762846	1455610809	78613	528707	2395679102	41.8	64177	33919	11108	23933	154.32
LRYS6	S690	Landrace x Yorkshire	2398268733	0.94087	European	84731	69747	55160	46675	30249	15762	2398268733	2391901611	2355141185	2292639682	2016735891	1496150033	75517	603438	2396006293	41.81	66981	35366	10611	22891	167.15
LRYS2	S750	Landrace x Yorkshire	2399160890	0.94166	European	93770	78525	61342	50972	31365	15317	2399160890	2392277708	2348711671	2272298733	1944305154	1369827302	84930	521423	2396850792	41.82	58500	31064	12150	26115	129.71
LRYS3	S735	Landrace x Yorkshire	2399434967	0.94154	European	94353	78909	61791	51244	31530	15132	2399434967	2392513076	2349274460	2271467700	1941339473	1352845529	85328	524904	2397094736	41.82	57564	30948	12254	26380	132.13
LRYS1	S756	Landrace x Yorkshire	2400982123	0.94196	European	88195	71656	56581	47727	30666	15776	2400982123	2394166659	2356147783	2290913175	2004549368	1469907295	77716	683966	2398485464	41.84	64598	34397	11008	23681	132.28
LR4	S115	Landrace	2371425209	0.94438	European	311371	233881	120256	72476	21794	4634	2371425209	2324728273	2046318542	1701970766	905601004	322509118	283197	221653	2360515091	42	18791	9006	34499	79682	89.5
LR5	S114	Landrace	2376332154	0.94475	European	308388	228970	116989	70928	22569	5170	2376332154	2328442751	2054317394	1722619860	962482460	369446691	279738	292788	2365199493	42.02	19734	9219	32511	76265	68.63
LR2	S5732	Landrace	2399618732	0.94117	European	300829	251355	139679	77806	18899	2681	2399618732	2369629791	2071129755	1626764783	714162650	174109115	282913	197313	2392736783	41.87	15755	8064	43468	96469	55.17
LR1	S5624	Landrace	2414303320	0.94516	European	269150	208436	112979	73034	25568	6064	2414303320	2377299763	2142155346	1853868566	1098761025	429975868	247900	302419	2406072663	41.91	22481	10824	29968	68297	46.61
LR3	S6368	Landrace	2415660825	0.94263	European	230257	192681	121514	77496	25275	5481	2415660825	2393323632	2203224687	1883963778	1056111885	381103114	215901	240559	2410197194	41.89	21723	11155	31674	70273	43.65
LR6	SL401	Landrace	2428471302	0.93938	European	165277	137773	95883	69038	30633	10006	2428471302	2413323660	2303354872	2106983890	1485145567	767718115	152535	331012	2424176576	41.72	32737	16695	21095	46912	141.74
LR8	S199692650	Landrace	2435551556	0.94652	European	270426	203787	123312	77528	24915	5173	2435551556	2400501862	2187816349	1856140048	1023738207	352092448	235686	265361	2423113079	41.8	20896	10587	33138	73756	164.53
LR14	S199790341	Landrace	2436034527	0.94875	European	160330	113113	82195	63113	32335	12230	2436034527	2414247267	2335065127	2195115877	1689473405	979563596	131902	353985	2427391569	41.82	40780	21109	17425	38040	148.29
LR13	S199590201	Landrace	2437405211	0.94146	European	170753	125800	86585	64483	32011	11714	2437405211	2419023914	2317915339	2157387806	1626774699	911080497	141588	414042	2430364327	41.81	38105	19354	18700	40916	244.72
LR9	S199691212	Landrace	2439881422	0.94111	European	185208	138962	95616	68962	31046	10012	2439881422	2417756764	2304152926	2109788507	1493724686	758782283	158406	367624	2431468461	41.82	32918	16757	21360	47129	304.61
LR18	Landrace	Landrace	#N/A	#N/A	European	94659	15521	4458	3936	3380	2985	2440981886	2407953361	2389700393	2385952568	2376790139	2362790703	39987	13569045	2424638385	41.85	1418959	741995	493	1081	843.29
LR16	S199590172	Landrace	2442588877	0.94651	European	184761	130009	91235	67401	31761	10804	2442588877	2417584391	2316852014	2142239188	1560924102	827251594	150423	313043	2431930039	41.82	35139	18060	20113	44090	167.12
LR15	S199590090	Landrace	2445147377	0.94769	European	188797	130292	91915	68164	31707	10657	2445147377	2417966564	2318465773	2144770271	1549393699	812094969	152616	373645	2433511875	41.83	34670	17918	20398	44707	176.8
LR17	S199790201	Landrace	2448713182	0.9422	European	229875	181019	117404	77834	27532	6323	2448713182	2425389878	2255793666	1968443636	1162374960	433924461	202835	231656	2441024222	41.84	23698	12340	29922	65457	258.57
LR12	S199590673	Landrace	2449195145	0.94243	European	172213	120058	83108	62501	31811	12398	2449195145	2427677382	2333643068	2183537872	1680441115	996537695	138002	371692	2440401102	41.83	40597	20520	17370	38423	202.91
LR11	S199690016	Landrace	2449679999	0.9482	European	187927	128251	91438	68139	32071	10770	2449679999	2422517924	2326906410	2156405468	1564917509	819264060	149666	324700	2437473621	41.83	35060	18296	20362	44340	148.27
LR10	S199690232	Landrace	2465325597	0.94378	European	227943	150425	101027	72059	30501	9002	2465325597	2426165002	2299556626	2087897936	1414349515	668822994	184328	368684	2449433268	41.89	29923	15347	23565	51981	171.44
LR7	S199790081	Landrace	2467735925	0.94402	European	216563	142367	98275	71030	31093	9744	2467735925	2432042923	2317848137	2118423933	1468753669	725147270	172438	321900	2452807707	41.88	31646	16292	22461	49419	160.64
LR19	CB_1	Landrace	2474675084	0.9456	European	111430	82740	62163	51576	31529	15581	2474675084	2458202434	2410854618	2332790455	1997582981	1427359887	100744	736733	2471610794	41.95	59477	31059	12072	26374	22.14
LR20	CB_2	Landrace	2481553932	0.94475	European	109177	78036	56579	47363	30348	16090	2481553932	2464016383	2416351856	2348573581	2062985350	1552740519	96923	562141	2477977744	41.94	67580	34584	10699	23425	31.25
LW5	BGI_LWH_LWH879	Laiwuhei	2381971793	0.93461	Chinese	146967	122515	85016	62025	30100	11403	2381971793	2369050753	2270222734	2102449744	1582554817	926285157	134348	372510	2377667595	41.63	38557	19043	17396	39273	256.44
LW4	BGI_LWH_LWH181	Laiwuhei	2382620044	0.9373	Chinese	134519	114251	81881	61176	30599	12021	2382620044	2371862791	2286077221	2134766824	1636208094	983817343	124281	510954	2379143128	41.65	40791	20423	16584	37148	256.64
LW2	BGI_LWH_LWH0M	Laiwuhei	2382960575	0.93843	Chinese	125199	106909	78610	59836	30895	12752	2382960575	2373302441	2297827198	2160535108	1687110353	1047472716	115803	442951	2379767652	41.69	43424	21848	15812	35073	239.11
LW1	BGI_LWH_LWH0F	Laiwuhei	2387429947	0.93866	Chinese	119487	99505	73065	56372	30528	13327	2387429947	2377152042	2307418760	2185643278	1761421432	1152551360	108467	468185	2383660718	41.67	48139	24110	14128	31601	233.82
LW3	BGI_LWH_LWH13	Laiwuhei	2388900992	0.93557	Chinese	121117	104716	76845	58943	30876	12786	2388900992	2380254891	2305836608	2174684917	1714500018	1075122336	112708	507970	2386061044	41.68	44599	22514	15286	34039	223.25
LW6	BGI_LWH_LWH1183	Laiwuhei	2391541413	0.93606	Chinese	127179	103599	74106	56540	30003	13062	2391541413	2379319014	2302237216	2174054647	1739797024	1139998168	114581	555617	2387245892	41.65	47222	23145	14167	32108	233.48
HUAI3	HM31	Huai	2511230965	0.94601	Chinese	220128	162219	109052	76601	30260	8135	2511230965	2475916693	2339878903	2102408610	1352917083	589212486	203339	263325	2504668874	41.95	27388	14268	26418	57956	8.61
HUAI2	s54	Huai	2512255727	0.94527	Chinese	271056	198224	126544	82212	26379	5217	2512255727	2468628775	2281616984	1958631758	1070703206	352025042	247186	226868	2502761895	41.92	21349	11189	34211	74511	13.09
HUAI1	s56	Huai	2519620553	0.94403	Chinese	251293	181184	119524	80943	28702	6245	2519620553	2477713825	2318843432	2037152784	1199585752	429116054	229033	247658	2510872374	41.95	23808	12500	30991	67193	7.56
HTDE3	BGI_HTDE_HTDE125	Hetaodaer	2338418626	0.93499	Chinese	189884	162759	105611	71370	27827	7232	2338418626	2323406111	2170833396	1922095185	1221748773	511031768	176860	253296	2333946280	41.44	26401	13417	25696	56601	376.2
HTDE6	BGI_HTDE_HTDE328	Hetaodaer	2348627017	0.92922	Chinese	153886	128356	85612	62570	30101	10859	2348627017	2334502003	2223464666	2056106830	1526905065	850401157	141759	325860	2344459583	41.34	36752	18298	18390	40904	283.86
HTDE2	BGI_HTDE_HTDE70	Hetaodaer	2363654313	0.93219	Chinese	173158	147141	100266	70854	29472	8367	2363654313	2349239848	2225122021	2010481131	1340544311	607456179	160958	269890	2359452359	41.56	29300	15162	23525	51446	266.96
HTDE1	BGI_HTDE_HTDE12	Hetaodaer	2369370125	0.93107	Chinese	144162	120538	83674	62077	30616	11437	2369370125	2356532311	2260247892	2102624588	1588820049	913294995	132604	356352	2365406547	41.55	38760	19499	17575	38991	257.66
HTDE5	BGI_HTDE_HTDE314	Hetaodaer	2372278784	0.93233	Chinese	154837	127554	87904	64484	30456	10591	2372278784	2357647505	2253997395	2083058961	1527330551	830062021	141139	349471	2367546920	41.55	35854	18219	18970	42059	265.71
HTDE4	BGI_HTDE_HTDE201	Hetaodaer	2374729696	0.93622	Chinese	152149	126022	86179	62747	29900	11185	2374729696	2360712641	2255991437	2085473460	1550764269	893785651	139113	498342	2370268300	41.55	37434	18457	17943	40464	276.32
HSH1	Hampshire	Hampshire	#N/A	#N/A	European	82206	13043	4344	3831	3245	2855	2437109612	2408930839	2394459117	2390850375	2381184872	2367152586	32639	9165455	2422312081	41.85	1558168	786651	435	975	790.13
GZS2	GF99	Guizhonghua	2489353883	0.94301	Chinese	213986	157876	108041	76471	30380	8137	2489353883	2455767460	2326992241	2096246018	1350115065	582527148	195632	298843	2482162746	41.97	27604	14515	26228	57113	12.35
GZS3	GM12	Guizhonghua	2496885122	0.94587	Chinese	232522	175027	115271	78354	28602	6989	2496885122	2462031546	2306209047	2037156125	1238750764	498285176	214997	272125	2489899852	41.95	24843	12918	28851	63456	7.99
GZS1	GF38	Guizhonghua	2496975928	0.94291	Chinese	245545	181392	118350	79553	28157	6346	2496975928	2458074556	2294297752	2011670381	1186974999	440580815	225997	244866	2489191670	41.95	23739	12413	30523	66571	8.36
GZ3	GZHF10	Guanzhuanghua	2490982653	0.94173	Chinese	184507	134659	94711	70241	32040	10525	2490982653	2460365332	2359345221	2180297629	1557228302	806122609	170805	441547	2485650916	41.95	33844	17471	21215	46712	8.81
GZ2	GZ08F	Guanzhuanghua	2493609174	0.9423	Chinese	164035	120464	88146	67831	33551	11673	2493609174	2467388245	2385866270	2236628864	1672276489	904710791	150356	423297	2488493853	41.97	37457	19841	19551	42245	8.48
GZ1	GGZM02	Guanzhuanghua	2515302501	0.94416	Chinese	289551	211327	131292	82823	24841	4553	2515302501	2469461598	2259748024	1907521830	991092920	305823349	261172	232670	2504105378	41.95	19873	10414	36574	79938	11.93
GDS1	s121	GDxiaoerhua	2493899641	0.94501	Chinese	187276	139028	97271	71633	32164	9994	2493899641	2464889139	2358818678	2171228493	1527721160	754080943	171986	372397	2488074020	41.97	32623	17017	22222	48543	11.29
GDS3	s75	GDxiaoerhua	2498866724	0.94619	Chinese	179366	132389	93379	69764	32391	10900	2498866724	2470460512	2372479591	2199508887	1588187109	835690902	164665	432811	2493228709	41.96	34746	18030	20805	45646	11
GDS2	s74	GDxiaoerhua	2511143410	0.94403	Chinese	234134	166728	109948	76565	29937	7893	2511143410	2470958591	2326981212	2083511064	1331906241	571360925	211497	267513	2502266047	41.96	26903	13867	26823	59058	6.73
GDS4	HZ_1	GDxiaoerhua	2469875527	0.94466	Chinese	114920	83320	62541	51911	31801	15454	2469875527	2451738992	2403873819	2325571463	1989065226	1404676398	103275	580730	2466373611	41.94	58644	30732	12291	26788	26.02
GDS5	HZ_2	GDxiaoerhua	2470741265	0.94509	Chinese	116921	85043	63503	52541	31956	15425	2470741265	2452887837	2403095750	2322225661	1978986023	1389307703	104500	584472	2467134866	41.94	57654	30108	12523	27282	24.87
GLGS2	GLHM1	Gaoligongshan	2504859113	0.94671	Chinese	243491	181812	118707	79977	28387	6304	2504859113	2467436236	2303921128	2021601754	1193332263	440722952	224263	271213	2497248437	41.96	23805	12452	30655	66688	13.9
GLGS1	GLHF22	Gaoligongshan	2509576983	0.94459	Chinese	200409	144203	99141	72936	32424	9803	2509576983	2475199588	2363684255	2171624108	1510213819	723908267	183973	376635	2503258684	41.97	31583	16589	23221	50383	11.7
GLGS3	s88	Gaoligongshan	2524237602	0.9464	Chinese	249379	173029	112890	78069	29781	7381	2524237602	2478958118	2327779773	2073410480	1294834090	524241711	223123	342368	2513980947	41.97	25886	13429	28294	61897	10.97
EHL4	BGI_EHL_ER_CS0234	Erhualian	2383449088	0.93283	Chinese	125111	105111	76734	58971	31057	12824	2383449088	2372936826	2298378306	2168194763	1710309423	1066097582	114747	370605	2379916413	41.64	44385	22559	15455	34197	213.83
EHL5	BGI_EHL_ER_CS3544	Erhualian	2384549424	0.93209	Chinese	122373	103422	77070	59838	31685	12707	2384549424	2374719557	2304919703	2178670844	1714350706	1042873236	112399	364220	2381174772	41.69	43762	22736	15867	34682	190.38
EHL10	EHL10	Erhualian	2395113384	0.93738	Chinese	153103	130721	93984	68634	30738	10032	2395113384	2383158357	2285082869	2099552269	1482190246	760555164	141910	371350	2391331908	41.75	33217	17257	20794	45686	233.62
EHL11	EHL11	Erhualian	2380923424	0.93557	Chinese	217776	190891	123837	79000	24535	4800	2380923424	2365412123	2181843922	1855933915	992095967	323409920	206668	207933	2377155904	41.76	20889	11085	33139	72060	245.37
EHL12	EHL12	Erhualian	2392544241	0.93615	Chinese	169802	146068	103061	72792	29477	8259	2392544241	2379554204	2262549573	2041233272	1340188407	606229498	158506	270571	2388705992	41.76	28735	15115	24037	52635	236.16
EHL13	EHL13	Erhualian	2400894235	0.93613	Chinese	151449	127283	91588	67294	30598	10481	2400894235	2387948180	2293165506	2114887620	1515620915	812498605	139585	446250	2396872989	41.75	34559	17839	19815	43929	210.48
EHL14	EHL14	Erhualian	2383848333	0.935	Chinese	207264	180935	120602	78699	25676	5224	2383848333	2368916064	2203800374	1898654090	1051385777	356546829	195750	246779	2379925736	41.76	22133	11793	31572	68235	244.67
EHL15	EHL15	Erhualian	2396541031	0.93635	Chinese	163040	140311	99784	71383	30025	8947	2396541031	2383992067	2275007830	2067177788	1395165135	663878554	152658	321416	2393022278	41.77	30312	15929	22807	50001	210.57
EHL16	EHL16	Erhualian	2396993110	0.93578	Chinese	158631	135186	96181	69543	30479	9542	2396993110	2384267897	2279904462	2085171524	1450742971	723339656	147409	327792	2393187745	41.76	32018	16610	21486	47310	220.27
EHL17	EHL17	Erhualian	2406730378	0.94228	Chinese	338161	287475	151657	77471	14551	1407	2406730378	2374834191	2008844303	1477167488	517188671	87535275	322853	145397	2400833244	41.79	13088	6896	53263	116332	51.35
EHL18	EHL18	Erhualian	2395353374	0.94093	Chinese	317179	275109	148621	77969	15536	1708	2395353374	2368566892	2025733968	1518409018	562987789	107702458	305044	179412	2390703977	41.77	13746	7234	50405	110159	58.87
EHL19	EHL19	Erhualian	2395485563	0.9421	Chinese	337596	291121	152742	77028	13784	1293	2395485563	2365789876	1991901297	1449037137	487976684	80316778	324431	172077	2390405085	41.78	12726	6771	54529	118671	50.5
EHL20	EHL20	Erhualian	2396566762	0.9417	Chinese	332121	286636	151850	77331	14314	1345	2396566762	2367523891	2003424681	1468858115	509676639	83920497	319198	132092	2391621063	41.79	13026	6906	53379	116323	53.19
EHL21	EHL21	Erhualian	2394940557	0.93571	Chinese	160243	136590	96600	69312	30129	9427	2394940557	2382130694	2274769363	2075488028	1439267455	715939702	148806	315472	2391063231	41.72	32006	16432	21509	47563	231.82
EHL22	EHL22	Erhualian	2395157277	0.93786	Chinese	153695	131666	94239	68136	30178	9845	2395157277	2383173894	2282580121	2091461262	1473415550	763039566	143249	396972	2391616128	41.73	33190	17099	20540	45649	219.6
EHL6	EHL6	Erhualian	2387759489	0.9353	Chinese	205928	179562	120034	78633	26008	5380	2387759489	2372847044	2210205673	1908212967	1070166989	366612676	194318	224363	2383797782	41.79	22353	11887	31159	67605	232.14
EHL7	EHL7	Erhualian	2392515043	0.93624	Chinese	176997	152276	105998	73568	28946	7778	2392515043	2378932679	2253777966	2016781516	1296164201	564789923	165344	316493	2388575431	41.76	27482	14453	25054	54927	232.82
EHL8	EHL8	Erhualian	2399183597	0.93629	Chinese	171602	146007	102832	73085	29793	8365	2399183597	2385221130	2269645325	2051841532	1350588626	609256997	159498	358100	2395102598	41.77	28908	15264	24102	52580	207.42
EHL9	EHL9	Erhualian	2374718380	0.93468	Chinese	219721	192303	123760	78166	24360	4715	2374718380	2359152332	2171536264	1839971721	987549162	320043922	207498	253864	2370578042	41.74	20795	10913	33040	72227	293.4
TBSC1	TBSC1	Erhualian	2382874945	0.93285	Chinese	125462	105361	76935	59057	30977	12740	2382874945	2372394035	2297451693	2166589651	1704705431	1061607614	114983	371777	2379351072	41.64	44116	22410	15470	34346	212.72
DLY7	SBlood_LY	Duroc x (Landrace x Yorkshire)	2396607672	0.93655	European	96944	79266	63054	52123	31360	14915	2396607672	2388121836	2345305667	2264699588	1918356501	1330531032	85677	474230	2392753288	41.84	56576	29992	12394	26844	189.64
DLY1	SDLY6	Duroc x (Landrace x Yorkshire)	2407847677	0.93777	European	90364	70927	55626	47035	30522	16002	2407847677	2397971307	2360707458	2297417366	2020237808	1498441384	79972	535173	2404316479	41.84	65974	35191	10845	23244	105.71
DLY3	SDLY5	Duroc x (Landrace x Yorkshire)	2408231115	0.93742	European	80511	60922	47830	41058	28182	16302	2408231115	2398572950	2366894432	2317296041	2100893587	1672273984	69169	654893	2404357430	41.84	80374	42308	8909	19153	120.26
DLY6	SDLY4	Duroc x (Landrace x Yorkshire)	2409854909	0.93788	European	75521	56101	43683	37991	26825	16230	2409854909	2400283163	2371015016	2329179554	2141085353	1756709397	64377	647904	2406076995	41.83	89453	47042	7973	17216	116.39
DLY2	SDLY3	Duroc x (Landrace x Yorkshire)	2412832456	0.94082	European	92593	72715	56299	46965	29823	15696	2412832456	2402899921	2362233909	2293687391	2008254827	1501556755	81298	626566	2408967606	41.85	67048	34641	10568	23011	118.9
DLY5	SDLY1	Duroc x (Landrace x Yorkshire)	2414931696	0.94112	European	95255	74338	57251	47462	30060	15580	2414931696	2404616269	2362038632	2290120835	1999128819	1479348667	83047	601886	2410789958	41.85	65266	34055	10784	23525	116.36
DLY4	SDLY2	Duroc x (Landrace x Yorkshire)	2415489430	0.94113	European	85519	64688	49582	42033	27996	16061	2415489430	2405062092	2368755452	2313340872	2078453017	1646648042	73842	643606	2411513827	41.84	78507	40729	9030	19648	111.53
DR3	SG308f	Duroc	2412338345	0.9442	European	122918	105921	77873	60137	31755	13020	2412338345	2403774690	2330416986	2200815119	1734521988	1069791854	114409	431235	2409994755	41.83	44334	22643	15894	34822	69.5
DR5	SG304f	Duroc	2423306676	0.94511	European	120947	97485	73027	57957	32065	13716	2423306676	2413090265	2350703113	2240068651	1810614242	1160848880	107507	470281	2420426663	41.86	47734	24854	14727	32254	36.96
DR1	SG305f	Duroc	2423364745	0.94525	European	127141	102269	76386	59862	32163	13192	2423364745	2412385579	2345836123	2224416838	1767280534	1097016817	112980	508073	2420185229	41.86	45007	23473	15576	34139	34.6
DR4	SG306f	Duroc	2424442936	0.94586	European	119621	94482	71000	56663	32001	14144	2424442936	2413952334	2355021730	2249679999	1840034553	1207992265	104580	488702	2421323837	41.86	49878	25881	14198	31057	33.75
DR2	SG303f	Duroc	2426210313	0.94604	European	124410	99941	74532	58733	32219	13378	2426210313	2415056662	2351001264	2234770848	1796071957	1128332739	111039	514681	2423169249	41.87	46296	24288	15111	33084	31.62
DR8	D1	Duroc	2470375090	0.94638	European	98881	71737	52252	44277	29192	16070	2470375090	2455199799	2413015742	2354272986	2101631813	1629657275	88257	679372	2467605807	41.93	74469	38069	9581	21131	27.1
DR9	D2	Duroc	2471966836	0.94462	European	101286	73588	54318	45816	29701	16096	2471966836	2456926676	2414158034	2351690755	2081515862	1592690560	89545	799059	2468856725	41.93	70866	36444	10083	22157	32.56
DR6	DR6	Duroc	2406474906	0.94345	European	313964	269842	147235	78379	16445	1954	2406474906	2378427852	2047837216	1553184124	602432817	123911284	301164	213919	2401532382	41.78	14206	7448	48769	107059	97.1
DR7	DR7	Duroc	2400461492	0.9451	European	306144	266570	147535	79271	16409	1825	2400461492	2375123333	2052070463	1561736256	595977605	114874284	295018	168328	2396207060	41.81	14309	7542	48816	106318	57.59
DNS1	DNF52	Diannanxiaoer	2499505218	0.94387	Chinese	188774	136174	95896	71399	32623	10353	2499505218	2467835358	2367121871	2187562008	1553892865	776013053	172216	318858	2493180743	41.96	33262	17428	21971	47718	13.45
DNS2	DNF58	Diannanxiaoer	2504978585	0.94417	Chinese	256924	190144	122911	81349	27333	5694	2504978585	2464990721	2289868188	1986739298	1123248829	386933482	234885	233179	2496252864	41.96	22437	11773	32609	70786	8.92
DNS3	DNM73	Diannanxiaoer	2513722726	0.94677	Chinese	192595	141602	97758	72438	32637	10080	2513722726	2482692456	2373979152	2188536804	1539311706	754060495	177426	302794	2508100050	41.96	32483	16973	22618	49182	10.94
DB2	DB5005	Debao	2474631912	0.93916	Chinese	186395	139200	98048	71695	31533	9740	2474631912	2446029429	2340360475	2147814051	1493754594	734878369	172103	388763	2469079227	41.95	31977	16617	22365	49035	11.12
DB3	DB8016	Debao	2506004026	0.94298	Chinese	226992	166397	110896	77458	30130	7654	2506004026	2469247223	2327609374	2083434514	1318239355	544969857	208594	300646	2498779835	41.97	26585	13905	27460	59784	14.8
DB1	DB24	Debao	2509083907	0.94672	Chinese	196465	144187	99165	72656	32013	9829	2509083907	2477261387	2364572679	2170773643	1508617708	737703501	181142	352616	2503333520	41.98	31607	16513	22877	50098	12.22
LBW3	MA2606	Dahuabai	2492853637	0.94476	Chinese	214331	159451	107347	74997	29781	8339	2492853637	2460025984	2325224624	2089162212	1360275024	617289348	196067	389655	2485698274	41.96	27991	14339	25346	56315	10.78
LBW1	A14002	Dahuabai	2509612577	0.94254	Chinese	281263	210653	133424	84834	24572	3973	2509612577	2468456056	2264942055	1910620244	952117235	259943512	254689	205208	2499359812	41.94	19595	10488	38049	81309	17.14
LBW2	A8802	Dahuabai	2514868149	0.94265	Chinese	219723	154847	105819	76097	31464	8633	2514868149	2476659416	2353203628	2135563948	1411270522	622020326	196753	299298	2505961300	41.96	28741	15129	25563	55418	12.92
BSH1	Berkshire	Berkshire	#N/A	#N/A	European	94468	14819	4125	3654	3087	2701	2434706773	2401788251	2384115848	2380746201	2371517062	2357638785	38789	8406765	2418127229	41.84	1668665	826602	417	928	827.97
BS1	BSHM1	Baoshan	2502591909	0.94842	Chinese	155495	102280	71049	57322	33051	14517	2502591909	2471237446	2400983857	2300311047	1896068184	1237582483	137384	514414	2496180229	41.99	49507	25816	14729	32110	14.64
BS2	s09_2820	Baoshan	2516097418	0.94473	Chinese	219237	157854	105998	75710	31158	8634	2516097418	2478736540	2349204879	2127841728	1404163320	624922664	200846	301534	2508973283	41.97	28537	14967	25552	55753	16.15
BS3	s1401	Baoshan	2536184091	0.94745	Chinese	307273	223602	135385	83799	24074	3978	2536184091	2485768406	2257735177	1882797371	941537878	264354709	280256	295416	2525234132	41.96	18935	9864	38878	84920	6.67
BMX4	BGI_BMX_BMX0012	Bamaxiang	2372578214	0.9368	Chinese	200129	175386	120481	80268	26245	4926	2372578214	2358945953	2208181697	1914188449	1050382155	327006936	188522	209018	2368601524	41.77	22279	12136	31925	67790	212.6
BMX6	BGI_BMX_BMX0001	Bamaxiang	2382222370	0.93413	Chinese	141525	118123	85577	64191	31263	11316	2382222370	2370036332	2283445926	2127053739	1588267718	889252186	129148	369928	2377970884	41.65	37732	19461	18244	40097	206.56
BMX3	BGI_BMX_BMX0013	Bamaxiang	2385573436	0.93573	Chinese	132602	109195	80400	61503	31484	12217	2385573436	2373651298	2297400346	2159122602	1668126999	988941926	119597	403490	2381138211	41.66	41538	21336	16652	36579	234.78
BMX2	BGI_BMX_BMX0014	Bamaxiang	2386086639	0.93546	Chinese	127737	107234	79982	61583	31714	12286	2386086639	2375538535	2303319789	2168198600	1676975675	989840751	116586	378817	2382283096	41.7	41717	21697	16708	36419	215.79
BMX5	BGI_BMX_BMX0005	Bamaxiang	2386692608	0.93473	Chinese	128630	107391	79925	61326	31655	12344	2386692608	2375747788	2302490077	2165761640	1677841012	995180538	117128	446710	2382757756	41.69	41819	21645	16643	36347	204.78
BMX1	BGI_BMX_BMX0015	Bamaxiang	2386756530	0.93553	Chinese	126370	105967	79274	61081	31778	12512	2386756530	2376263526	2305083385	2171689465	1689935071	1010577191	115332	384058	2383008252	41.69	42267	21977	16454	35927	203.68

## Sheet: Supplemental_Table_S5
Supplemental Table S5. Summary of removing potential contaminatations
Sample	Total length of sequences aligned to Sus scrofa	Total length of sequences aligned to other Artiodactyla	Total length of sequences aligned to Microorganism	Total length of sequences aligned to other organism	Total length of sequences not aligned in NT database	Total length of unmapped sequences	Total length of non-reference sequences used for clustering
SYWB2	3911048	55876	5970	102450	9233106	13308450	13200030
TCH2	9109953	43816	453346	1711778	14856733	26175626	24010502
TCH3	9309344	55963	527138	2902950	16581563	29376958	25946870
TTGB2	4620117	37167	4327	186592	9019557	13867760	13676841
TTML1	3678377	52934	79378	87542	7837525	11735756	11568836
TTML2	3163390	40578	1285	77127	8145416	11427796	11349384
BMX1	4287156	39016	7445	145540	8684336	13163493	13010508
TTGB1	4163882	57657	3431	153365	8049858	12428193	12271397
TTGB3	4862162	51050	12012	236579	9331089	14492892	14244301
BMX2	4342456	50573	615	145818	8684580	13224042	13077609
BMX3	4315570	38842	621	190807	8771533	13317373	13125945
BMX4	4005817	51895	1215	174162	8902899	13135988	12960611
BMX5	4522112	44888	2733	173587	8777550	13520870	13344550
BS1	9099330	106554	15428	2828221	15862843	27912376	25068727
BMX6	4519928	40941	3088	169076	8866145	13599178	13427014
BS2	8737405	36467	23334	2807358	14084300	25688864	22858172
BS3	10526791	125154	18626	2113505	15922494	28706570	26574439
BSH1	3292873	70785	11867	138293	5700198	9214016	9063856
DB1	9651793	70766	28565	2373549	16000296	28124969	25722855
DB2	7375911	54389	2896	2447624	12176423	22057243	19606723
DB3	9158013	77155	8687	2592543	14555957	26392355	23791125
DLY1	3286995	71911	16753	278230	7523124	11177013	10882030
DLY2	4044041	40283	7168	242004	7733971	12067467	11818295
DLY3	3306292	63816	15497	341266	7237377	10964248	10607485
DLY4	4100388	36483	16810	336603	7978962	12469246	12115833
DLY5	4184588	75455	8401	285943	7888642	12443029	12148685
DLY6	3164829	54336	16805	283844	7481101	11000915	10700266
DNS1	8870253	91561	12016	2359688	14105997	25439515	23067811
DLY7	3070544	52741	4179	114917	6414257	9656638	9537542
DNS2	8983169	73231	2102	1434892	13120209	23613603	22176609
DQZ3	4883702	38107	763	209485	9458486	14590543	14380295
DQZ1	4899170	72091	617	237341	9586759	14795978	14558020
DNS3	9528139	44783	19642	2527782	17644624	29764970	27217546
DQZ2	4645400	55159	3452	218331	9379637	14301979	14080196
DQZ4	4927984	41670	5373	347135	10021265	15343427	14990919
DQZ5	4838883	44502	984794	274475	11410685	17553339	16294070
DQZ6	3153914	34390	653	110629	8033232	11332818	11221536
DQZ7	4696138	59284	2343	256802	9475464	14490031	14230886
DR1	4331202	36655	168720	377671	8005021	12919269	12372878
DR2	4456480	55876	66388	356945	7896321	12832010	12408677
DR3	3677371	61557	27920	256299	7041226	11064373	10780154
GDS1	9045999	63179	11654	2062281	13773272	24956385	22882450
DR4	4333464	57501	139862	298752	7739704	12569283	12130669
DR5	4413254	38371	56053	358099	7304352	12170129	11755977
GDS3	8945691	58648	6878	2314060	14586209	25911486	23590548
GDS2	9161927	49045	22523	6809891	16455591	32498977	25666563
GLGS1	8830512	65819	7500	2267071	15745430	26916332	24641761
GLGS2	9604149	106432	10320	2223141	15333655	27277697	25044236
GLGS3	9828822	108419	270818	7063285	18625645	35896989	28562886
GSZ2	4262457	52962	198656	72250	9022452	13608777	13337871
GSZ1	3732555	31654	61143	85125	8219459	12129936	11983668
GSZ3	4323594	31126	9784	175974	8028945	12569423	12383665
GSZ4	3548482	46500	57999	135931	8105156	11894068	11700138
GZ1	9239844	82761	16493	3660452	16034866	29034416	25357471
GZ2	7861223	110875	8700	2299444	14095491	24375733	22067589
GZ3	7905124	77100	17141	2142845	15293399	25435609	23275623
GZS1	8492415	68176	9117	2273327	14470186	25313221	23030777
GZS2	8303389	38081	8217	2306245	13302144	23958076	21643614
GZS3	8882957	68602	14340	1743624	13341523	24051046	22293082
HSH1	3289503	53004	11804	131366	5237287	8722964	8579794
HTDE2	3560872	43459	2741	107576	8292571	12007219	11896902
HTDE1	3904072	39172	302699	164044	8843944	13253931	12787188
HTDE3	3936092	38305	8314	171929	8135883	12290523	12110280
HTDE4	4128134	62572	6717	109951	8585556	12892930	12776262
HTDE6	3623588	48104	310597	147434	7549153	11678876	11220845
HTDE5	3755764	30890	501864	167300	9069284	13525102	12855938
HUAI1	9573936	74127	475537	2374688	15314406	27812694	24962469
HUAI2	9314480	93595	364540	2882302	16639330	29294247	26047405
LBW3	8849329	72908	5179	3097010	12903391	24927817	21825628
LBW1	7903822	43239	26584	3695356	14660039	26329040	22607100
HUAI3	9181712	101316	13734	1461541	16589217	27347520	25872245
LC1	4428432	31613	6197	160165	8091005	12717412	12551050
LBW2	8699494	114610	13917	6160438	13984466	28972925	22798570
LC3	4431402	33350	2570690	192629	8992294	16220365	13457046
LC2	4384881	61654	6547	215095	8412474	13080651	12859009
LC5	4393128	24604	2440	104255	8417233	12941660	12834965
LC4	4517224	63235	2530	247261	8206773	13037023	12787232
LC6	4026539	33433	3603	129966	7666902	11860443	11726874
LONGL3	8322586	93749	14959	1794051	15688178	25913523	24104513
LLR7	6083776	94432	9142	667839	10114907	16970096	16293115
LONGL1	10229622	123764	144145	2167021	17567454	30232006	27920840
LONGL2	9047352	42611	6153	2093890	13701574	24891580	22791537
LR10	5995452	48917	18714	880978	10153432	17097493	16197801
LR11	5215043	59302	13738	320382	8163776	13772241	13438121
LR13	4882633	39931	12088	353846	7883573	13172071	12806137
LR15	5051100	64619	18227	484974	8342408	13961328	13458127
LR12	5217166	37057	12165	442743	8569781	14278912	13824004
LR14	5042942	81838	12172	390941	8260763	13788656	13385543
LR16	5018951	50425	23254	357481	8301227	13751338	13370603
LR17	4977525	29720	21067	729099	9850635	15608046	14857880
LR18	3512511	75551	5415	53150	5646074	9292701	9234136
LR1	4447685	29540	13750	977557	9968286	15436818	14445511
LR3	3635387	79371	16669	589309	8770638	13091374	12485396
LR2	3459070	25966	9611	651453	7668867	11814967	11153903
LR4	3837996	45964	7905	601805	7402933	11896603	11286893
LR5	4034232	43195	10997	600915	7257750	11947089	11335177
LR6	4603992	51417	128967	889361	11784271	17458008	16439680
LR8	4669219	62082	11097	405079	8304659	13452136	13035960
LR9	5031808	32490	8130	628864	9413442	15114734	14477740
LRYS1	3314012	36404	8714	287620	6987750	10634500	10338166
LRYS2	3245882	71647	6705	251854	6640914	10217002	9958443
LRYS3	3119039	66411	11085	272856	7253306	10722697	10438756
LRYS4	3109717	54331	10088	195502	6619423	9989061	9783471
LRYS5	2965265	69368	7360	227592	6471323	9740908	9505956
LRYS6	3068815	53279	15253	217891	6919595	10274833	10041689
LRYS7	3093745	67042	10135	160992	6585640	9917554	9746427
LTA1	7803592	38300	9388	1595909	14210070	23657259	22051962
LTA2	7669581	62854	4853	1710578	14300273	23748139	22032708
LTA3	8644042	115900	22015	1511674	13296659	23590290	22056601
LTZ1	5023379	45617	878	180522	9135649	14386045	14204645
LTZ2	4931560	48485	3493	160214	9303277	14447029	14283322
LTZ3	4789952	40262	52764	181431	9107269	14171678	13937483
LTZ4	3882563	72325	1957	163333	8668302	12788480	12623190
LTZ5	4493633	50370	3108	188142	7908115	12643368	12452118
LW1	4511207	49571	45333	74597	8699610	13380318	13260388
LW2	4494448	46003	3628	76951	8526877	13147907	13067328
LW3	4582897	42374	15711	112495	8173397	12926874	12798668
LW4	4446275	72194	46290	153217	8903843	13621819	13422312
LW6	4858335	41984	346172	199084	10037073	15482648	14937392
LW5	4797003	38461	1391728	122855	8681292	15031339	13516756
MBS1	7590605	105376	12475	2231857	16287720	26228033	23983701
MBS2	8738210	74849	443816	2455336	13690666	25402877	22503725
MBS3	9210472	95116	13112	2249951	16944082	28512733	26249670
MZ1	3502559	39166	47831	191977	8163408	11944941	11705133
MZ2	4473278	65105	24247	121099	8429728	13113457	12968111
MZ3	4407532	40355	80558	178150	8574770	13281365	13022657
MZ4	4218007	41515	16635	101226	8133907	12511290	12393429
MZ5	4274178	40240	125405	156676	8585627	13182126	12900045
MZ6	4352600	56351	41197	222647	9010378	13683173	13419329
NCWB1	4727571	58054	23933	191720	9290824	14292102	14076449
NCWB2	5156391	57926	96745	308559	11724142	17343763	16938459
PT1	8110510	258862	72770	2149503	16095774	26687419	24465146
PT2	8957947	87232	36102	2242642	16977281	28301204	26022460
PT3	8290427	111289	20208	2470013	13684290	24576227	22086006
PTR1	3687988	62603	11512	214358	7114499	11090960	10865090
PTR2	3104474	44681	70571	234158	6538548	9992432	9687703
PTR3	3232162	50355	6263	259616	6377056	9925452	9659573
PTR4	3283311	61785	12004	330426	7067150	10754676	10412246
PTR5	4118253	32056	10155	250338	7320552	11731354	11470861
PTR6	3895301	45545	7631	263991	7305489	11517957	11246335
PTR7	3762464	82576	8599	262851	7651601	11768091	11496641
PTR9	3503522	66978	4540	97672	5337336	9010048	8907836
PTR8	3865257	61619	6968	233290	7001633	11168767	10928509
SB1	8953297	290800	26741	2172933	14596776	26040547	23840873
SB2	8614493	78355	92152	2293185	13058890	24137075	21751738
SB3	9725478	73128	17628	8211226	18744222	36771682	28542828
SYWB1	4298318	51289	35581	232229	8907366	13524783	13256973
TCH1	9890049	70512	15254	2299746	15018923	27294484	24979484
TTML3	2881934	48477	3923	67270	7514593	10516197	10445004
WZS2	4591861	45498	1118	160193	8410482	13209152	13047841
WZS1	4298892	52694	21840	171391	8497886	13042703	12849472
WZS4	4814850	60262	3896	183770	9828783	14891561	14703895
WZS3	4461492	45142	4320	201910	8860929	13573793	13367563
WZS5	4949960	54188	31279	146934	9388393	14570754	14392541
WZS6	4445901	42158	580	184483	8434882	13108004	12922941
WZS7	4158498	43452	81981	277707	8483314	13044952	12685264
WZS8	4113777	63426	19268	122918	7986798	12306187	12164001
YDB1	9134814	65285	23166	2453649	16423253	28100167	25623352
YDB2	8413325	31683	22802	1526555	13857991	23852356	22302999
YDB3	8255261	36770	8392	2343441	14825978	25469842	23118009
YS1	3224222	74603	11252	199345	6972615	10482037	10271440
YS2	3567080	39984	15073	159533	6189456	9971126	9796520
ZJWB1	3867612	37594	16493	124371	7934333	11980403	11839539
ZJWB2	3887582	31098	210498	177049	8783588	13089815	12702268
C1	6953258	49043	9045	2445783	15769421	25226550	22771722
CB-1	6007368	105628	13536	2409997	14201709	22738238	20314705
C2	7039819	51593	6109	2869859	15248514	25215894	22339926
CB-2	6316543	53104	10177	2648754	16823297	25851875	23192944
D1	6090636	55472	17576	2249986	13970911	22384581	20117019
D2	5398873	65587	43083	2246592	13840048	21594183	19304508
DB-2	5901472	48817	5168222	2169923	24533756	37822190	30484045
DB-1	6400724	60099	38172	2341669	16683973	25524637	23144796
DR6	3770167	44010	337424	349036	11719934	16220571	15534111
DR7	3953623	36055	19745	256552	8155029	12421004	12144707
EHL10	3889472	40348	4517	481873	10457656	14873866	14387476
EHL12	3746088	54834	22168	468658	10498172	14789920	14299094
EHL11	3660596	36047	17683	381026	11065000	15160352	14761643
EHL13	4120038	54781	14786	392822	10959758	15542185	15134577
EHL14	3660621	44758	21850	303705	10756804	14787738	14462183
EHL15	3866643	39458	11063	579351	11145448	15641963	15051549
EHL18	4476364	36422	21797	301131	9671993	14507707	14184779
EHL16	3885071	30818	197241	475740	10943577	15532447	14859466
EHL17	4704241	46629	4099174	294849	13751756	22896649	18502626
EHL19	4425126	45173	19937	358534	10166926	15015696	14637225
EHL20	4821145	48628	13971	350509	9847518	15081771	14717291
EHL21	3855711	40508	32984	638188	10291020	14858411	14187239
EHL22	3908292	36666	2248	391494	9802088	14140788	13747046
EHL7	3985415	41910	653	303473	10948982	15280433	14976307
EHL6	3737282	36847	8013	417544	10899364	15099050	14673493
EHL8	4117715	55236	4734	420902	11718025	16316612	15890976
EHL9	3557927	29112	663258	528608	10771755	15550660	14358794
HZ-1	7553435	44186	7190	1447687	14452920	23505418	22050541
HZ-2	7350847	62378	10599	1805841	15464647	24694312	22877872
LT-1	7534626	71094	10300	2531964	15340714	25488698	22946434
LT-2	7748834	59203	9011	2883277	17241931	27942256	25049968
S-1	8140026	68798	7887	2078121	16715182	27010014	24924006
S-2	8525530	81278	10073	2407364	17440190	28464435	26046998
TBGS1	5811878	43769	258121	745924	15140604	22000296	20996251
TBGS2	5137256	53666	60611	659048	12320878	18231459	17511800
TBGS3	5823395	56610	389343	715122	13584949	20569419	19464954
TBGS4	5222147	50551	400851	632884	13372060	19678493	18644758
TBGS5	4649620	41837	10184	343364	11859348	16904353	16550805
TBGS6	5537805	67925	344019	820258	13400101	20170108	19005831
TBSC1	3775236	44488	85540	298146	8221619	12425029	12041343
TBSC2	5395569	42907	17933	747661	12262513	18466583	17700989
TBSC3	5875319	44517	9946	737521	13910505	20577808	19830341
TBSC5	5977173	39959	24880	1008992	14108126	21159130	20125258
TBSC4	5420779	64815	8376	638906	12023541	18156417	17509135
TBSC6	5390430	53156	8385	843309	13414443	19709723	18858029
TBTB1	5570528	58130	67761	692331	14850898	21239648	20479556
TBTB2	5391254	30947	1565	510336	12159772	18093874	17581973
TBTB3	5300906	48162	18660	860327	14485980	20714035	19835048
TBTB4	4695584	28602	15602	620944	11624642	16985374	16348828
TBTB5	5840709	49600	3368	647435	13514030	20055142	19404339
TBTB7	5919469	48490	9420	806998	13364335	20148712	19332294
TBTB6	4889678	43922	19814	611106	12609991	18174511	17543591
TBYN1	5932387	43152	5807	967374	13686271	20634991	19661810
TBYN2	5598010	37800	5706	969109	14393289	21003914	20029099
TBYN3	5035497	49814	11343	757382	13868021	19722057	18953332
TBYN4	5661704	46970	4008	875736	13620504	20208922	19329178
TBYN5	5223300	44402	132134	1068852	13379318	19848006	18647020
TBYN6	5314563	31987	607	971602	13715060	20033819	19061610
WZ-1	8744287	44556	12857	1743744	15874861	26420305	24663704
WZ-2	8452696	47645	10971	2257261	15483644	26252217	23983985
YS10	1848272	27672	1628	287740	7231581	9396893	9107525
YS12	2444024	46187	8181	372532	8811659	11682583	11301870
YS11	2659775	31393	13684	533185	8462080	11700117	11153248
YS13	2618152	39575	15966	498050	8863493	12035236	11521220
YS14	2396701	27907	10546	346448	7899068	10680670	10323676
YS15	2711916	57897	19222	386196	9032973	12208204	11802786
YS16	2210963	34410	8757	340666	7873446	10468242	10118819
YS17	2206660	26109	6756	366453	8373639	10979617	10606408
YS18	2761866	43734	9402	410047	8523834	11748883	11329434
YS19	2676656	50302	5630	560333	9021680	12314601	11748638
YS20	2338756	26229	34692	253672	8501682	11155031	10866667
YS21	2722968	39844	1176664	527120	13683006	18149602	16445818
YS22	2674653	33031	140362	810255	8384250	12042551	11091934
YS23	2363029	40565	18492	257625	8483135	11162846	10886729
YS24	2412130	27775	12266	429744	8553475	11435390	10993380
YS25	2491143	39384	13762	327348	8767099	11638736	11297626
YS26	2699888	35436	46389	610918	9165765	12558396	11901089
YS27	2469977	36204	16354	285690	7719607	10527832	10225788
YS28	2599927	36038	79462	384951	8842843	11943221	11478808
YS29	2458879	29367	17088	396496	8315367	11217197	10803613
YS30	2094615	37422	2924	299495	7325290	9759746	9457327
YS31	2509874	40477	8895	388449	8555053	11502748	11105404
YS32	2414649	48830	16398	559379	8958771	11998027	11422250
YS33	2564962	38965	14634	316097	8164059	11098717	10767986
YS34	1920452	23999	17330	366062	6736975	9064818	8681426
YS3	2809433	26864	16784	420096	8432614	11705791	11268911
YS4	2598961	48122	6840	577289	8811838	12043050	11458921
YS5	2490354	34402	23495	428211	8188455	11164917	10713211
YS6	2453807	34417	59627	298817	8438944	11285612	10927168
YS7	2460947	45646	28064	368964	8198044	11101665	10704637
YS8	2422588	47462	12126	346305	8360348	11188829	10830398
YS9	2634493	35637	22846	583622	8886210	12162808	11556340

## Sheet: Supplemental_Table_S6
Supplemental Table S6. RNA-seq data of multiple pig tissues used for gene model training
Sequence Read Archive (SRA)	Breed	Size	Individual	Tissues	Description
SRR066366	Danish Landrace x Yorkshire cross pig	928.6Mb	GSM595679	Embryonic fetal fibroblast cells	RNA-Seq transcriptome profiling of in vitro cultures of migrating porcine primordial germ cells and porcine fetal fibroblasts of mini pig embryos between days 17-24 of gestation
SRR066365	Danish Landrace x Yorkshire cross pig	1G	GSM595678	Embryonic fetal fibroblast cells	RNA-Seq transcriptome profiling of in vitro cultures of migrating porcine primordial germ cells and porcine fetal fibroblasts of mini pig embryos between days 17-24 of gestation
SRR5190477	Tibetan	4.4G	GSM2464093	liver	Comparative transcriptomic analysis provides insights into high-altitude adaptation
SRR5190396	Rongchang	4G	GSM2464012	muscle	Comparative transcriptomic analysis provides insights into high-altitude adaptation
SRR5190397	Rongchang	4.9G	GSM2464013	heart	Comparative transcriptomic analysis provides insights into high-altitude adaptation
SRR5190398	Rongchang	4.4G	GSM2464014	lung	Comparative transcriptomic analysis provides insights into high-altitude adaptation
SRR5190469	Rongchang	5.6G	GSM2464085	liver	Comparative transcriptomic analysis provides insights into high-altitude adaptation
SRR5190470	Rongchang	5G	GSM2464086	spleen	Comparative transcriptomic analysis provides insights into high-altitude adaptation
SRR5190449	Rongchang	4.7G	GSM2464065	kidney	Comparative transcriptomic analysis provides insights into high-altitude adaptation
SRR9673264	Erhualian	5.9G	Deoxynivalenol treatment group 2	Ovary	Transcriptional analysis of deoxynivalenol‐induced apoptosis of sow ovarian granulosa cell
SRR2564766	Guizhou mininature pig	8G	GSM1902352	adipose	Comprehensive Profiles of mRNAs and miRNAs Reveal Molecular Characteristics of Multiple Organ Physiologies and Development in Pigs
SRR2564762	Guizhou mininature pig	8.4G	GSM1902350	testis	Comprehensive Profiles of mRNAs and miRNAs Reveal Molecular Characteristics of Multiple Organ Physiologies and Development in Pigs
SRR5577194	Wei	14.1G	GSM2632190	Skeletal muscle	Identification of differentially expressed genes in longissimus dorsi muscle between Wei and Yorkshire pigs using RNA-sequencing
SRR5577193	Wei	9.9G	GSM2632189	Skeletal muscle	Identification of differentially expressed genes in longissimus dorsi muscle between Wei and Yorkshire pigs using RNA-sequencing
SRR8631866	Yorkshire	8.9G	BG3	liver	Transcriptomic Comparison of Liver Tissue Between Anqing Six-End-White Pigs and Yorkshire Pigs Based on RNA Sequencing
SRR5577191	Yorkshire	15.8G	GSM2632187	Skeletal muscle	Identification of differentially expressed genes in longissimus dorsi muscle between Wei and Yorkshire pigs using RNA-sequencing
SRR5577189	Yorkshire	15.7G	GSM2632185	Skeletal muscle	Identification of differentially expressed genes in longissimus dorsi muscle between Wei and Yorkshire pigs using RNA-sequencing
SRR6853384	Duroc	16.5G	High_RFI2	skeletal muscle	Transcriptome Analysis of Skeletal Muscle in Pigs With Divergent Residual Feed Intake Phenotypes
SRR6853389	Duroc	12.1G	Low_RFI2	skeletal muscle	Transcriptome Analysis of Skeletal Muscle in Pigs With Divergent Residual Feed Intake Phenotypes
SRR9114677	Jiangquhai	15.8G	SRS4811051	lung	RNA-seq transcriptome profiling of porcine lung from two pig breeds in response to Mycoplasma hyopneumoniae infection
SRR7039081	Landrace × Pietrain	3.5G	GSM3104352	The complete male embryos (including embryonic disc and trophectoderm cells)	Differential transcriptome dynamics during the onset of conceptus elongation and between female and male porcine embryos
SRR7039076	Landrace × Pietrain	2.4G	GSM3104347	The complete female embryos (including embryonic disc and trophectoderm cells)	Differential transcriptome dynamics during the onset of conceptus elongation and between female and male porcine embryos
SRR4299272	Yanan	5.1G	YN164_M	longissimus dorsi muscle	Comparison of microRNA s in adipose and muscle tissue from seven indigenous Chinese breeds and Yorkshire pigs
SRR4299271	Yanan	5G	YN164_A	subcutaneous adipose tissues of back	Comparison of microRNA s in adipose and muscle tissue from seven indigenous Chinese breeds and Yorkshire pigs
SRR4299266	Yacha	5.2G	YC119_M	longissimus dorsi muscle	Comparison of microRNA s in adipose and muscle tissue from seven indigenous Chinese breeds and Yorkshire pigs
SRR4299265	Yacha	5.1G	YC119_A	subcutaneous adipose tissues of back	Comparison of microRNA s in adipose and muscle tissue from seven indigenous Chinese breeds and Yorkshire pigs
SRR4299259	Wujin	5.1G	WJ48_M	subcutaneous adipose tissues of back	Comparison of microRNA s in adipose and muscle tissue from seven indigenous Chinese breeds and Yorkshire pigs
SRR4299258	Wujin	5.1G	WJ35_M	longissimus dorsi muscle	Comparison of microRNA s in adipose and muscle tissue from seven indigenous Chinese breeds and Yorkshire pigs
SRR4299254	Tibetan	5G	TP279_M	longissimus dorsi muscle	Comparison of microRNA s in adipose and muscle tissue from seven indigenous Chinese breeds and Yorkshire pigs
SRR4299248	Qingyu	5G	QY25_M	longissimus dorsi muscle	Comparison of microRNA s in adipose and muscle tissue from seven indigenous Chinese breeds and Yorkshire pigs
SRR4299247	Qingyu	5.2G	QY25_A	subcutaneous adipose tissues of back	Comparison of microRNA s in adipose and muscle tissue from seven indigenous Chinese breeds and Yorkshire pigs
SRR4299135	Neijiang	5.2G	NJ88_M	longissimus dorsi muscle	Comparison of microRNA s in adipose and muscle tissue from seven indigenous Chinese breeds and Yorkshire pigs
SRR4299131	Neijiang	5.2G	NJ78_A	subcutaneous adipose tissues of back	Comparison of microRNA s in adipose and muscle tissue from seven indigenous Chinese breeds and Yorkshire pigs
SRR4299128	Chenghua	5.1G	CH195_M	longissimus dorsi muscle	Comparison of microRNA s in adipose and muscle tissue from seven indigenous Chinese breeds and Yorkshire pigs
SRR4299124	Chenghua	5G	CH172_A	subcutaneous adipose tissues of back	Comparison of microRNA s in adipose and muscle tissue from seven indigenous Chinese breeds and Yorkshire pigs
SRR8379829	Jinhua	528.8M	GSM3535218	liver	Integrated mRNA and miRNA profiles expression of liver between Jinhua and Landrace pigs
SRR8379830	Jinhua	676.7M	GSM3535219	liver	Integrated mRNA and miRNA profiles expression of liver between Jinhua and Landrace pigs
SRR8379831	Jinhua	720.9M	GSM3535220	liver	Integrated mRNA and miRNA profiles expression of liver between Jinhua and Landrace pigs

## Sheet: Supplemental_Table_S7
Supplemental Table S7. The number of SNPs and Indels called and their positions relative to genes in the population
Total SNPs:	63268534
UTR’5 Prime：	210185
Splice_Site_Donor：	1557
Downstream：	1580932
Intergenic：	35174767
Splice_Site_Acceptor：	1419
UTR’3 Prime：	542191
Splice_Site_Region：	52880
Exon：	1377782
Upstream：	1523958
Intron：	26954282
In non-reference genome:	3107619
Total InDels:	9680576
UTR’5 Prime：	20733
Splice_Site_Acceptor：	1490
Downstream：	240146
Splice_Site_Donor：	513
Intergenic：	5522809
UTR’3 Prime：	77906
Splice_Site_Region：	8221
Exon：	95709
Upstream：	229596
Intron：	4104245
In non-reference genome:	636812

## Sheet: Supplemental_Table_S8
Supplemental Table S8. List of enriched GO terms of non-reference genes
ID	Description	GeneRatio	BgRatio	P value	Adjust P value	Qvalue	GeneID	Count
GO:0032501	multicellular organismal process	218/539	218/18682	0	0	0	PANSSCG00000563/PANSSCG00000880/PANSSCG00001179/PANSSCG00001197/PANSSCG00001248/PANSSCG00001549/PANSSCG00001617/PANSSCG00001628/PANSSCG00001632/PANSSCG00001637/PANSSCG00001641/PANSSCG00001642/PANSSCG00001645/PANSSCG00001654/PANSSCG00001670/PANSSCG00001672/PANSSCG00001674/PANSSCG00001675/PANSSCG00001678/PANSSCG00001679/PANSSCG00001684/PANSSCG00001694/PANSSCG00001706/PANSSCG00001714/PANSSCG00001731…	218
GO:0044237	cellular metabolic process	289/539	300/18682	0	0	0	PANSSCG00000563/PANSSCG00000613/PANSSCG00000880/PANSSCG00000950/PANSSCG00000970/PANSSCG00000985/PANSSCG00000999/PANSSCG00001007/PANSSCG00001023/PANSSCG00001179/PANSSCG00001217/PANSSCG00001247/PANSSCG00001248/PANSSCG00001425/PANSSCG00001549/PANSSCG00001578/PANSSCG00001622/PANSSCG00001625/PANSSCG00001629/PANSSCG00001631/PANSSCG00001639/PANSSCG00001641/PANSSCG00001645/PANSSCG00001649/PANSSCG00001650…	289
GO:0044446	obsolete intracellular organelle part	312/539	312/18682	0	0	0	PANSSCG00000613/PANSSCG00000871/PANSSCG00000915/PANSSCG00000950/PANSSCG00000985/PANSSCG00000999/PANSSCG00001007/PANSSCG00001179/PANSSCG00001217/PANSSCG00001247/PANSSCG00001248/PANSSCG00001425/PANSSCG00001502/PANSSCG00001549/PANSSCG00001578/PANSSCG00001619/PANSSCG00001622/PANSSCG00001625/PANSSCG00001628/PANSSCG00001629/PANSSCG00001632/PANSSCG00001634/PANSSCG00001637/PANSSCG00001641/PANSSCG00001645…	312
GO:0050896	response to stimulus	277/539	451/18682	0	0	0	PANSSCG00000142/PANSSCG00000143/PANSSCG00000144/PANSSCG00000145/PANSSCG00000880/PANSSCG00001007/PANSSCG00001023/PANSSCG00001179/PANSSCG00001197/PANSSCG00001248/PANSSCG00001549/PANSSCG00001617/PANSSCG00001629/PANSSCG00001631/PANSSCG00001632/PANSSCG00001637/PANSSCG00001645/PANSSCG00001649/PANSSCG00001650/PANSSCG00001654/PANSSCG00001663/PANSSCG00001674/PANSSCG00001675/PANSSCG00001678/PANSSCG00001679…	277
GO:0051716	cellular response to stimulus	216/539	216/18682	0	0	0	PANSSCG00000142/PANSSCG00000143/PANSSCG00000144/PANSSCG00000145/PANSSCG00000880/PANSSCG00001007/PANSSCG00001023/PANSSCG00001248/PANSSCG00001549/PANSSCG00001617/PANSSCG00001632/PANSSCG00001637/PANSSCG00001649/PANSSCG00001654/PANSSCG00001663/PANSSCG00001674/PANSSCG00001675/PANSSCG00001678/PANSSCG00001679/PANSSCG00001684/PANSSCG00001694/PANSSCG00001706/PANSSCG00001714/PANSSCG00001741/PANSSCG00001750…	216
GO:0071704	organic substance metabolic process	300/539	305/18682	0	0	0	PANSSCG00000563/PANSSCG00000613/PANSSCG00000871/PANSSCG00000880/PANSSCG00000915/PANSSCG00000950/PANSSCG00000970/PANSSCG00000985/PANSSCG00000999/PANSSCG00001007/PANSSCG00001023/PANSSCG00001179/PANSSCG00001217/PANSSCG00001247/PANSSCG00001248/PANSSCG00001425/PANSSCG00001549/PANSSCG00001578/PANSSCG00001622/PANSSCG00001625/PANSSCG00001629/PANSSCG00001631/PANSSCG00001639/PANSSCG00001641/PANSSCG00001642…	300
GO:0071840	cellular component organization or biogenesis	214/539	214/18682	0	0	0	PANSSCG00000950/PANSSCG00000999/PANSSCG00001023/PANSSCG00001179/PANSSCG00001248/PANSSCG00001425/PANSSCG00001484/PANSSCG00001485/PANSSCG00001550/PANSSCG00001582/PANSSCG00001583/PANSSCG00001617/PANSSCG00001619/PANSSCG00001625/PANSSCG00001632/PANSSCG00001634/PANSSCG00001637/PANSSCG00001645/PANSSCG00001649/PANSSCG00001654/PANSSCG00001655/PANSSCG00001657/PANSSCG00001659/PANSSCG00001670/PANSSCG00001675…	214
GO:0043170	macromolecule metabolic process	192/539	192/18682	7.20272967182102e-313	7.49564067847511e-311	2.43123717343579e-311	PANSSCG00000563/PANSSCG00000613/PANSSCG00000950/PANSSCG00000970/PANSSCG00000985/PANSSCG00000999/PANSSCG00001023/PANSSCG00001217/PANSSCG00001248/PANSSCG00001425/PANSSCG00001549/PANSSCG00001578/PANSSCG00001622/PANSSCG00001625/PANSSCG00001629/PANSSCG00001639/PANSSCG00001641/PANSSCG00001642/PANSSCG00001649/PANSSCG00001650/PANSSCG00001654/PANSSCG00001655/PANSSCG00001657/PANSSCG00001659/PANSSCG00001663…	192
GO:0060255	regulation of macromolecule metabolic process	190/539	190/18682	2.02785420616822e-309	1.97843e-307	6.41709e-308	PANSSCG00000563/PANSSCG00000740/PANSSCG00000880/PANSSCG00000950/PANSSCG00000970/PANSSCG00000999/PANSSCG00001023/PANSSCG00001217/PANSSCG00001248/PANSSCG00001425/PANSSCG00001502/PANSSCG00001549/PANSSCG00001578/PANSSCG00001622/PANSSCG00001625/PANSSCG00001629/PANSSCG00001634/PANSSCG00001636/PANSSCG00001637/PANSSCG00001641/PANSSCG00001649/PANSSCG00001650/PANSSCG00001654/PANSSCG00001655/PANSSCG00001663…	190
GO:0042221	response to chemical	188/539	188/18682	5.64547e-306	5.18387e-304	1.68141e-304	PANSSCG00000142/PANSSCG00000143/PANSSCG00000144/PANSSCG00000145/PANSSCG00000880/PANSSCG00001007/PANSSCG00001023/PANSSCG00001179/PANSSCG00001197/PANSSCG00001549/PANSSCG00001617/PANSSCG00001631/PANSSCG00001637/PANSSCG00001645/PANSSCG00001654/PANSSCG00001663/PANSSCG00001674/PANSSCG00001675/PANSSCG00001678/PANSSCG00001679/PANSSCG00001694/PANSSCG00001706/PANSSCG00001714/PANSSCG00001741/PANSSCG00001796…	188
GO:0070013	intracellular organelle lumen	179/539	179/18682	1.55986e-290	1.21747e-288	3.94892e-289	PANSSCG00000950/PANSSCG00000985/PANSSCG00000999/PANSSCG00001217/PANSSCG00001248/PANSSCG00001425/PANSSCG00001502/PANSSCG00001622/PANSSCG00001625/PANSSCG00001629/PANSSCG00001634/PANSSCG00001641/PANSSCG00001645/PANSSCG00001649/PANSSCG00001650/PANSSCG00001654/PANSSCG00001655/PANSSCG00001657/PANSSCG00001659/PANSSCG00001663/PANSSCG00001670/PANSSCG00001678/PANSSCG00001679/PANSSCG00001730/PANSSCG00001800…	179
GO:0031323	regulation of cellular metabolic process	174/539	178/18682	2.0066e-274	1.49157e-272	4.83797e-273	PANSSCG00000563/PANSSCG00000740/PANSSCG00000880/PANSSCG00001023/PANSSCG00001179/PANSSCG00001217/PANSSCG00001248/PANSSCG00001502/PANSSCG00001549/PANSSCG00001622/PANSSCG00001634/PANSSCG00001654/PANSSCG00001663/PANSSCG00001670/PANSSCG00001675/PANSSCG00001678/PANSSCG00001679/PANSSCG00001714/PANSSCG00001737/PANSSCG00001741/PANSSCG00001796/PANSSCG00001800/PANSSCG00001805/PANSSCG00001818/PANSSCG00001833…	174
GO:0034641	cellular nitrogen compound metabolic process	165/539	165/18682	1.0561e-266	7.66776e-265	2.48706e-265	PANSSCG00000563/PANSSCG00000950/PANSSCG00000970/PANSSCG00000985/PANSSCG00000999/PANSSCG00001023/PANSSCG00001179/PANSSCG00001217/PANSSCG00001247/PANSSCG00001248/PANSSCG00001425/PANSSCG00001549/PANSSCG00001578/PANSSCG00001625/PANSSCG00001629/PANSSCG00001641/PANSSCG00001645/PANSSCG00001649/PANSSCG00001650/PANSSCG00001654/PANSSCG00001655/PANSSCG00001657/PANSSCG00001659/PANSSCG00001663/PANSSCG00001670…	165
GO:0051171	regulation of nitrogen compound metabolic process	165/539	166/18682	1.71793e-264	1.19186e-262	3.86583e-263	PANSSCG00000563/PANSSCG00000740/PANSSCG00000880/PANSSCG00001023/PANSSCG00001217/PANSSCG00001248/PANSSCG00001502/PANSSCG00001549/PANSSCG00001622/PANSSCG00001634/PANSSCG00001636/PANSSCG00001654/PANSSCG00001663/PANSSCG00001670/PANSSCG00001675/PANSSCG00001678/PANSSCG00001679/PANSSCG00001737/PANSSCG00001741/PANSSCG00001800/PANSSCG00001805/PANSSCG00001833/PANSSCG00001849/PANSSCG00001884/PANSSCG00001885…	165
GO:0044260	cellular macromolecule metabolic process	160/539	160/18682	3.02146e-258	2.00702e-256	6.50985e-257	PANSSCG00000563/PANSSCG00000613/PANSSCG00000950/PANSSCG00000970/PANSSCG00000985/PANSSCG00000999/PANSSCG00001023/PANSSCG00001217/PANSSCG00001248/PANSSCG00001425/PANSSCG00001549/PANSSCG00001578/PANSSCG00001622/PANSSCG00001625/PANSSCG00001629/PANSSCG00001639/PANSSCG00001641/PANSSCG00001649/PANSSCG00001650/PANSSCG00001654/PANSSCG00001655/PANSSCG00001657/PANSSCG00001659/PANSSCG00001670/PANSSCG00001677…	160
GO:0006725	cellular aromatic compound metabolic process	147/539	149/18682	2.29562e-232	1.35225e-230	4.38608e-231	PANSSCG00000563/PANSSCG00000950/PANSSCG00000970/PANSSCG00000985/PANSSCG00000999/PANSSCG00001023/PANSSCG00001179/PANSSCG00001217/PANSSCG00001247/PANSSCG00001248/PANSSCG00001425/PANSSCG00001549/PANSSCG00001578/PANSSCG00001625/PANSSCG00001629/PANSSCG00001631/PANSSCG00001641/PANSSCG00001645/PANSSCG00001649/PANSSCG00001650/PANSSCG00001654/PANSSCG00001655/PANSSCG00001663/PANSSCG00001670/PANSSCG00001677…	147
GO:0097159	organic cyclic compound binding	147/539	149/18682	2.29562e-232	1.35225e-230	4.38608e-231	PANSSCG00000563/PANSSCG00001007/PANSSCG00001023/PANSSCG00001197/PANSSCG00001217/PANSSCG00001484/PANSSCG00001485/PANSSCG00001549/PANSSCG00001617/PANSSCG00001629/PANSSCG00001637/PANSSCG00001641/PANSSCG00001642/PANSSCG00001650/PANSSCG00001654/PANSSCG00001658/PANSSCG00001659/PANSSCG00001663/PANSSCG00001670/PANSSCG00001677/PANSSCG00001679/PANSSCG00001694/PANSSCG00001747/PANSSCG00001800/PANSSCG00001810…	147
GO:1901576	organic substance biosynthetic process	144/539	144/18682	2.26233e-231	1.30796e-229	4.24242e-230	PANSSCG00000563/PANSSCG00000613/PANSSCG00000871/PANSSCG00000915/PANSSCG00000950/PANSSCG00000970/PANSSCG00000985/PANSSCG00000999/PANSSCG00001023/PANSSCG00001179/PANSSCG00001217/PANSSCG00001247/PANSSCG00001248/PANSSCG00001425/PANSSCG00001578/PANSSCG00001625/PANSSCG00001629/PANSSCG00001631/PANSSCG00001645/PANSSCG00001649/PANSSCG00001650/PANSSCG00001654/PANSSCG00001655/PANSSCG00001659/PANSSCG00001670…	144
GO:1901363	heterocyclic compound binding	143/539	144/18682	1.49279e-227	8.17628e-226	2.65201e-226	PANSSCG00000563/PANSSCG00001007/PANSSCG00001023/PANSSCG00001197/PANSSCG00001217/PANSSCG00001484/PANSSCG00001485/PANSSCG00001549/PANSSCG00001617/PANSSCG00001629/PANSSCG00001637/PANSSCG00001641/PANSSCG00001642/PANSSCG00001650/PANSSCG00001654/PANSSCG00001658/PANSSCG00001659/PANSSCG00001663/PANSSCG00001670/PANSSCG00001677/PANSSCG00001679/PANSSCG00001694/PANSSCG00001747/PANSSCG00001800/PANSSCG00001810…	143
GO:0019538	protein metabolic process	145/539	151/18682	6.31454e-223	3.28567e-221	1.06572e-221	PANSSCG00000613/PANSSCG00000950/PANSSCG00000970/PANSSCG00000999/PANSSCG00001023/PANSSCG00001217/PANSSCG00001248/PANSSCG00001425/PANSSCG00001578/PANSSCG00001622/PANSSCG00001625/PANSSCG00001629/PANSSCG00001639/PANSSCG00001641/PANSSCG00001649/PANSSCG00001650/PANSSCG00001654/PANSSCG00001655/PANSSCG00001657/PANSSCG00001659/PANSSCG00001674/PANSSCG00001677/PANSSCG00001694/PANSSCG00001731/PANSSCG00001741…	145
GO:0046483	heterocycle metabolic process	141/539	144/18682	1.05264e-220	5.38744e-219	1.74743e-219	PANSSCG00000563/PANSSCG00000950/PANSSCG00000970/PANSSCG00000985/PANSSCG00000999/PANSSCG00001023/PANSSCG00001179/PANSSCG00001217/PANSSCG00001247/PANSSCG00001248/PANSSCG00001425/PANSSCG00001549/PANSSCG00001578/PANSSCG00001625/PANSSCG00001629/PANSSCG00001641/PANSSCG00001645/PANSSCG00001649/PANSSCG00001650/PANSSCG00001654/PANSSCG00001655/PANSSCG00001663/PANSSCG00001670/PANSSCG00001677/PANSSCG00001679…	141
GO:0006950	response to stress	137/539	137/18682	1.05896e-219	5.33238e-218	1.72958e-218	PANSSCG00000143/PANSSCG00000144/PANSSCG00000880/PANSSCG00001023/PANSSCG00001197/PANSSCG00001549/PANSSCG00001629/PANSSCG00001631/PANSSCG00001645/PANSSCG00001649/PANSSCG00001650/PANSSCG00001654/PANSSCG00001663/PANSSCG00001675/PANSSCG00001694/PANSSCG00001714/PANSSCG00001741/PANSSCG00001796/PANSSCG00001818/PANSSCG00001885/PANSSCG00001945/PANSSCG00001963/PANSSCG00001965/PANSSCG00001971/PANSSCG00001999…	137
GO:0070887	cellular response to chemical stimulus	133/539	133/18682	4.68116e-213	2.28353e-211	7.40671e-212	PANSSCG00000142/PANSSCG00000143/PANSSCG00000144/PANSSCG00000145/PANSSCG00000880/PANSSCG00001007/PANSSCG00001023/PANSSCG00001549/PANSSCG00001617/PANSSCG00001637/PANSSCG00001654/PANSSCG00001663/PANSSCG00001674/PANSSCG00001675/PANSSCG00001678/PANSSCG00001679/PANSSCG00001694/PANSSCG00001706/PANSSCG00001714/PANSSCG00001741/PANSSCG00001796/PANSSCG00001810/PANSSCG00001885/PANSSCG00001886/PANSSCG00001945…	133
GO:0007154	cell communication	151/539	182/18682	2.08058e-208	9.84179e-207	3.19222e-207	PANSSCG00000142/PANSSCG00000143/PANSSCG00000144/PANSSCG00000145/PANSSCG00000880/PANSSCG00001179/PANSSCG00001248/PANSSCG00001549/PANSSCG00001617/PANSSCG00001632/PANSSCG00001649/PANSSCG00001654/PANSSCG00001663/PANSSCG00001674/PANSSCG00001675/PANSSCG00001678/PANSSCG00001679/PANSSCG00001684/PANSSCG00001694/PANSSCG00001706/PANSSCG00001714/PANSSCG00001741/PANSSCG00001750/PANSSCG00001796/PANSSCG00001885…	151
GO:0010033	response to organic substance	147/539	170/18682	2.16606e-208	1.00932e-206	3.27376e-207	PANSSCG00000142/PANSSCG00000143/PANSSCG00000144/PANSSCG00000145/PANSSCG00000880/PANSSCG00001007/PANSSCG00001023/PANSSCG00001179/PANSSCG00001197/PANSSCG00001549/PANSSCG00001617/PANSSCG00001631/PANSSCG00001637/PANSSCG00001645/PANSSCG00001654/PANSSCG00001663/PANSSCG00001674/PANSSCG00001675/PANSSCG00001678/PANSSCG00001679/PANSSCG00001694/PANSSCG00001714/PANSSCG00001741/PANSSCG00001796/PANSSCG00001810…	147
GO:0044249	cellular biosynthetic process	133/539	137/18682	6.02118e-206	2.72437e-204	8.83658e-205	PANSSCG00000563/PANSSCG00000613/PANSSCG00000950/PANSSCG00000970/PANSSCG00000985/PANSSCG00000999/PANSSCG00001023/PANSSCG00001179/PANSSCG00001217/PANSSCG00001247/PANSSCG00001248/PANSSCG00001425/PANSSCG00001578/PANSSCG00001625/PANSSCG00001629/PANSSCG00001645/PANSSCG00001649/PANSSCG00001650/PANSSCG00001654/PANSSCG00001655/PANSSCG00001659/PANSSCG00001670/PANSSCG00001677/PANSSCG00001694/PANSSCG00001768…	133
GO:0048583	regulation of response to stimulus	125/539	125/18682	8.15285e-200	3.63617e-198	1.1794e-198	PANSSCG00000142/PANSSCG00000143/PANSSCG00000144/PANSSCG00000145/PANSSCG00000740/PANSSCG00000880/PANSSCG00001248/PANSSCG00001549/PANSSCG00001550/PANSSCG00001636/PANSSCG00001654/PANSSCG00001675/PANSSCG00001678/PANSSCG00001684/PANSSCG00001694/PANSSCG00001706/PANSSCG00001737/PANSSCG00001741/PANSSCG00001818/PANSSCG00001884/PANSSCG00001913/PANSSCG00001917/PANSSCG00001936/PANSSCG00001963/PANSSCG00001965…	125
GO:0044085	cellular component biogenesis	123/539	123/18682	1.6265e-196	7.15201e-195	2.31978e-195	PANSSCG00000950/PANSSCG00000999/PANSSCG00001023/PANSSCG00001179/PANSSCG00001248/PANSSCG00001425/PANSSCG00001484/PANSSCG00001485/PANSSCG00001625/PANSSCG00001637/PANSSCG00001645/PANSSCG00001649/PANSSCG00001654/PANSSCG00001655/PANSSCG00001675/PANSSCG00001677/PANSSCG00001679/PANSSCG00001694/PANSSCG00001730/PANSSCG00001731/PANSSCG00001800/PANSSCG00001810/PANSSCG00001867/PANSSCG00001884/PANSSCG00001886…	123
GO:0009058	biosynthetic process	145/539	181/18682	2.71421e-195	1.17691e-193	3.81735e-194	PANSSCG00000563/PANSSCG00000613/PANSSCG00000871/PANSSCG00000915/PANSSCG00000950/PANSSCG00000970/PANSSCG00000985/PANSSCG00000999/PANSSCG00001023/PANSSCG00001179/PANSSCG00001217/PANSSCG00001247/PANSSCG00001248/PANSSCG00001425/PANSSCG00001578/PANSSCG00001625/PANSSCG00001629/PANSSCG00001631/PANSSCG00001645/PANSSCG00001649/PANSSCG00001650/PANSSCG00001654/PANSSCG00001655/PANSSCG00001659/PANSSCG00001670…	145
GO:0065009	regulation of molecular function	120/539	120/18682	1.42407e-191	6.09034e-190	1.97542e-190	PANSSCG00000142/PANSSCG00000143/PANSSCG00000144/PANSSCG00000145/PANSSCG00000880/PANSSCG00001248/PANSSCG00001549/PANSSCG00001550/PANSSCG00001632/PANSSCG00001654/PANSSCG00001678/PANSSCG00001679/PANSSCG00001706/PANSSCG00001707/PANSSCG00001714/PANSSCG00001737/PANSSCG00001741/PANSSCG00001747/PANSSCG00001750/PANSSCG00001796/PANSSCG00001800/PANSSCG00001867/PANSSCG00001885/PANSSCG00001887/PANSSCG00001936…	120
GO:0007275	multicellular organism development	157/539	253/18682	2.10583e-182	8.76589e-181	2.84325e-181	PANSSCG00000563/PANSSCG00001197/PANSSCG00001248/PANSSCG00001549/PANSSCG00001617/PANSSCG00001632/PANSSCG00001637/PANSSCG00001642/PANSSCG00001645/PANSSCG00001654/PANSSCG00001672/PANSSCG00001674/PANSSCG00001675/PANSSCG00001678/PANSSCG00001679/PANSSCG00001731/PANSSCG00001741/PANSSCG00001800/PANSSCG00001811/PANSSCG00001867/PANSSCG00001885/PANSSCG00001887/PANSSCG00001942/PANSSCG00001963/PANSSCG00001971…	157
GO:0006996	organelle organization	120/539	127/18682	1.08597e-180	4.4031e-179	1.42816e-179	PANSSCG00001484/PANSSCG00001485/PANSSCG00001550/PANSSCG00001619/PANSSCG00001625/PANSSCG00001634/PANSSCG00001637/PANSSCG00001649/PANSSCG00001654/PANSSCG00001655/PANSSCG00001657/PANSSCG00001670/PANSSCG00001677/PANSSCG00001679/PANSSCG00001694/PANSSCG00001731/PANSSCG00001800/PANSSCG00001884/PANSSCG00001936/PANSSCG00001963/PANSSCG00001965/PANSSCG00001977/PANSSCG00001983/PANSSCG00002105/PANSSCG00002108…	120
GO:0044267	cellular protein metabolic process	120/539	127/18682	1.08597e-180	4.4031e-179	1.42816e-179	PANSSCG00000613/PANSSCG00000950/PANSSCG00000970/PANSSCG00000999/PANSSCG00001023/PANSSCG00001217/PANSSCG00001248/PANSSCG00001425/PANSSCG00001578/PANSSCG00001622/PANSSCG00001625/PANSSCG00001629/PANSSCG00001639/PANSSCG00001641/PANSSCG00001649/PANSSCG00001650/PANSSCG00001655/PANSSCG00001657/PANSSCG00001659/PANSSCG00001677/PANSSCG00001694/PANSSCG00001731/PANSSCG00001741/PANSSCG00001768/PANSSCG00001886…	120
GO:0044281	small molecule metabolic process	113/539	113/18682	4.46901e-180	1.78875e-178	5.80187e-179	PANSSCG00000871/PANSSCG00000880/PANSSCG00000915/PANSSCG00001007/PANSSCG00001023/PANSSCG00001179/PANSSCG00001247/PANSSCG00001631/PANSSCG00001645/PANSSCG00001677/PANSSCG00001679/PANSSCG00001694/PANSSCG00001731/PANSSCG00001867/PANSSCG00001885/PANSSCG00001963/PANSSCG00001974/PANSSCG00001999/PANSSCG00002034/PANSSCG00002043/PANSSCG00002044/PANSSCG00002053/PANSSCG00002214/PANSSCG00002242/PANSSCG00002272…	113
GO:0022607	cellular component assembly	111/539	112/18682	9.22933e-175	3.64734e-173	1.18303e-173	PANSSCG00001023/PANSSCG00001179/PANSSCG00001248/PANSSCG00001484/PANSSCG00001485/PANSSCG00001625/PANSSCG00001637/PANSSCG00001645/PANSSCG00001649/PANSSCG00001654/PANSSCG00001655/PANSSCG00001675/PANSSCG00001677/PANSSCG00001694/PANSSCG00001730/PANSSCG00001731/PANSSCG00001800/PANSSCG00001810/PANSSCG00001867/PANSSCG00001884/PANSSCG00001936/PANSSCG00001945/PANSSCG00001947/PANSSCG00001963/PANSSCG00001965…	111
GO:0009892	negative regulation of metabolic process	109/539	109/18682	1.57689e-173	6.15382e-172	1.99601e-172	PANSSCG00000563/PANSSCG00000740/PANSSCG00000950/PANSSCG00000970/PANSSCG00000999/PANSSCG00001023/PANSSCG00001217/PANSSCG00001425/PANSSCG00001502/PANSSCG00001578/PANSSCG00001625/PANSSCG00001629/PANSSCG00001634/PANSSCG00001641/PANSSCG00001649/PANSSCG00001650/PANSSCG00001654/PANSSCG00001655/PANSSCG00001663/PANSSCG00001679/PANSSCG00001741/PANSSCG00001884/PANSSCG00001885/PANSSCG00001913/PANSSCG00001977…	109
GO:1901700	response to oxygen-containing compound	106/539	106/18682	1.25354e-168	4.77264e-167	1.54802e-167	PANSSCG00000880/PANSSCG00001007/PANSSCG00001023/PANSSCG00001197/PANSSCG00001549/PANSSCG00001617/PANSSCG00001654/PANSSCG00001674/PANSSCG00001675/PANSSCG00001694/PANSSCG00001714/PANSSCG00001741/PANSSCG00001796/PANSSCG00001810/PANSSCG00001849/PANSSCG00001885/PANSSCG00001886/PANSSCG00001945/PANSSCG00001963/PANSSCG00001971/PANSSCG00001974/PANSSCG00001999/PANSSCG00002044/PANSSCG00002056/PANSSCG00002092…	106
GO:0006139	nucleobase-containing compound metabolic process	124/539	153/18682	2.8645e-167	1.07747e-165	3.4948e-166	PANSSCG00000563/PANSSCG00000950/PANSSCG00000970/PANSSCG00000985/PANSSCG00000999/PANSSCG00001023/PANSSCG00001179/PANSSCG00001217/PANSSCG00001247/PANSSCG00001248/PANSSCG00001425/PANSSCG00001549/PANSSCG00001578/PANSSCG00001625/PANSSCG00001629/PANSSCG00001641/PANSSCG00001645/PANSSCG00001649/PANSSCG00001650/PANSSCG00001654/PANSSCG00001655/PANSSCG00001663/PANSSCG00001670/PANSSCG00001677/PANSSCG00001679…	124
GO:0010646	regulation of cell communication	104/539	104/18682	2.29158e-165	8.51703e-164	2.76253e-164	PANSSCG00000142/PANSSCG00000143/PANSSCG00000144/PANSSCG00000145/PANSSCG00000880/PANSSCG00001248/PANSSCG00001549/PANSSCG00001550/PANSSCG00001654/PANSSCG00001678/PANSSCG00001694/PANSSCG00001706/PANSSCG00001737/PANSSCG00001741/PANSSCG00001800/PANSSCG00001818/PANSSCG00001884/PANSSCG00001885/PANSSCG00001913/PANSSCG00001936/PANSSCG00001963/PANSSCG00001965/PANSSCG00001983/PANSSCG00002056/PANSSCG00002062…	104
GO:0032879	regulation of localization	102/539	102/18682	4.15179e-162	1.52493e-160	4.94615e-161	PANSSCG00000143/PANSSCG00000880/PANSSCG00001179/PANSSCG00001549/PANSSCG00001550/PANSSCG00001582/PANSSCG00001583/PANSSCG00001654/PANSSCG00001674/PANSSCG00001694/PANSSCG00001706/PANSSCG00001707/PANSSCG00001741/PANSSCG00001800/PANSSCG00001818/PANSSCG00001849/PANSSCG00001867/PANSSCG00001885/PANSSCG00001887/PANSSCG00001913/PANSSCG00001917/PANSSCG00001947/PANSSCG00001965/PANSSCG00001983/PANSSCG00002092…	102
GO:0048869	cellular developmental process	103/539	105/18682	5.08671e-160	1.84659e-158	5.98949e-159	PANSSCG00000563/PANSSCG00001197/PANSSCG00001248/PANSSCG00001582/PANSSCG00001583/PANSSCG00001625/PANSSCG00001632/PANSSCG00001637/PANSSCG00001645/PANSSCG00001654/PANSSCG00001655/PANSSCG00001674/PANSSCG00001678/PANSSCG00001679/PANSSCG00001731/PANSSCG00001800/PANSSCG00001811/PANSSCG00001867/PANSSCG00001885/PANSSCG00001887/PANSSCG00001936/PANSSCG00001942/PANSSCG00001972/PANSSCG00001983/PANSSCG00002092…	103
GO:0023051	regulation of signaling	105/539	110/18682	5.84156e-159	2.09625e-157	6.79925e-158	PANSSCG00000142/PANSSCG00000143/PANSSCG00000144/PANSSCG00000145/PANSSCG00000880/PANSSCG00001248/PANSSCG00001549/PANSSCG00001550/PANSSCG00001654/PANSSCG00001678/PANSSCG00001694/PANSSCG00001706/PANSSCG00001737/PANSSCG00001741/PANSSCG00001800/PANSSCG00001818/PANSSCG00001884/PANSSCG00001885/PANSSCG00001913/PANSSCG00001936/PANSSCG00001963/PANSSCG00001965/PANSSCG00001983/PANSSCG00002056/PANSSCG00002062…	105
GO:0009893	positive regulation of metabolic process	99/539	99/18682	3.14863e-157	1.09222e-155	3.54266e-156	PANSSCG00000563/PANSSCG00000880/PANSSCG00001179/PANSSCG00001248/PANSSCG00001549/PANSSCG00001637/PANSSCG00001654/PANSSCG00001663/PANSSCG00001670/PANSSCG00001675/PANSSCG00001678/PANSSCG00001679/PANSSCG00001737/PANSSCG00001741/PANSSCG00001800/PANSSCG00001818/PANSSCG00001885/PANSSCG00001887/PANSSCG00001913/PANSSCG00001965/PANSSCG00002056/PANSSCG00002108/PANSSCG00002111/PANSSCG00002407/PANSSCG00002470…	99
GO:0010605	negative regulation of macromolecule metabolic process	99/539	99/18682	3.14863e-157	1.09222e-155	3.54266e-156	PANSSCG00000563/PANSSCG00000740/PANSSCG00000950/PANSSCG00000970/PANSSCG00000999/PANSSCG00001023/PANSSCG00001217/PANSSCG00001425/PANSSCG00001502/PANSSCG00001578/PANSSCG00001625/PANSSCG00001629/PANSSCG00001634/PANSSCG00001641/PANSSCG00001649/PANSSCG00001650/PANSSCG00001654/PANSSCG00001655/PANSSCG00001663/PANSSCG00001679/PANSSCG00001741/PANSSCG00001884/PANSSCG00001885/PANSSCG00001913/PANSSCG00001977…	99
GO:0051239	regulation of multicellular organismal process	99/539	99/18682	3.14863e-157	1.09222e-155	3.54266e-156	PANSSCG00000143/PANSSCG00000144/PANSSCG00000145/PANSSCG00000880/PANSSCG00001179/PANSSCG00001248/PANSSCG00001549/PANSSCG00001582/PANSSCG00001583/PANSSCG00001617/PANSSCG00001654/PANSSCG00001674/PANSSCG00001675/PANSSCG00001694/PANSSCG00001706/PANSSCG00001741/PANSSCG00001885/PANSSCG00001977/PANSSCG00001983/PANSSCG00002092/PANSSCG00002111/PANSSCG00002132/PANSSCG00002296/PANSSCG00002470/PANSSCG00002540…	99
GO:0009056	catabolic process	100/539	101/18682	7.3536e-157	2.52285e-155	8.18295e-156	PANSSCG00000950/PANSSCG00000970/PANSSCG00000999/PANSSCG00001007/PANSSCG00001217/PANSSCG00001248/PANSSCG00001425/PANSSCG00001578/PANSSCG00001625/PANSSCG00001629/PANSSCG00001631/PANSSCG00001645/PANSSCG00001649/PANSSCG00001650/PANSSCG00001654/PANSSCG00001655/PANSSCG00001672/PANSSCG00001878/PANSSCG00001892/PANSSCG00001945/PANSSCG00001963/PANSSCG00001974/PANSSCG00002043/PANSSCG00002044/PANSSCG00002214…	100
GO:0044248	cellular catabolic process	98/539	98/18682	1.32685e-155	4.50263e-154	1.46045e-154	PANSSCG00000950/PANSSCG00000970/PANSSCG00000999/PANSSCG00001007/PANSSCG00001217/PANSSCG00001248/PANSSCG00001425/PANSSCG00001578/PANSSCG00001625/PANSSCG00001629/PANSSCG00001631/PANSSCG00001645/PANSSCG00001649/PANSSCG00001650/PANSSCG00001654/PANSSCG00001655/PANSSCG00001672/PANSSCG00001892/PANSSCG00001945/PANSSCG00001963/PANSSCG00001974/PANSSCG00002043/PANSSCG00002044/PANSSCG00002214/PANSSCG00002272…	98
GO:0051641	cellular localization	99/539	100/18682	3.07482e-155	1.03221e-153	3.34802e-154	PANSSCG00000950/PANSSCG00000970/PANSSCG00000999/PANSSCG00001217/PANSSCG00001247/PANSSCG00001425/PANSSCG00001549/PANSSCG00001578/PANSSCG00001619/PANSSCG00001625/PANSSCG00001629/PANSSCG00001642/PANSSCG00001649/PANSSCG00001650/PANSSCG00001655/PANSSCG00001657/PANSSCG00001663/PANSSCG00001679/PANSSCG00001694/PANSSCG00001706/PANSSCG00001730/PANSSCG00001818/PANSSCG00001840/PANSSCG00001906/PANSSCG00001926…	99
GO:0048513	animal organ development	104/539	111/18682	6.60394e-155	2.19335e-153	7.11421e-154	PANSSCG00001197/PANSSCG00001248/PANSSCG00001549/PANSSCG00001617/PANSSCG00001637/PANSSCG00001645/PANSSCG00001654/PANSSCG00001672/PANSSCG00001674/PANSSCG00001678/PANSSCG00001679/PANSSCG00001731/PANSSCG00001800/PANSSCG00001811/PANSSCG00001867/PANSSCG00001885/PANSSCG00001963/PANSSCG00001972/PANSSCG00001983/PANSSCG00001999/PANSSCG00002111/PANSSCG00002132/PANSSCG00002139/PANSSCG00002296/PANSSCG00002394…	104
GO:0009889	regulation of biosynthetic process	97/539	97/18682	5.57907e-154	1.83346e-152	5.94689e-153	PANSSCG00000563/PANSSCG00001023/PANSSCG00001179/PANSSCG00001502/PANSSCG00001549/PANSSCG00001622/PANSSCG00001634/PANSSCG00001654/PANSSCG00001663/PANSSCG00001679/PANSSCG00001741/PANSSCG00001800/PANSSCG00001805/PANSSCG00001833/PANSSCG00001849/PANSSCG00001884/PANSSCG00001885/PANSSCG00001963/PANSSCG00001965/PANSSCG00002105/PANSSCG00002108/PANSSCG00002111/PANSSCG00002407/PANSSCG00002470/PANSSCG00002536…	97
GO:0031325	positive regulation of cellular metabolic process	96/539	96/18682	2.34069e-152	7.61212e-151	2.46902e-151	PANSSCG00000563/PANSSCG00000880/PANSSCG00001179/PANSSCG00001248/PANSSCG00001549/PANSSCG00001654/PANSSCG00001663/PANSSCG00001670/PANSSCG00001675/PANSSCG00001678/PANSSCG00001679/PANSSCG00001737/PANSSCG00001741/PANSSCG00001800/PANSSCG00001818/PANSSCG00001885/PANSSCG00001887/PANSSCG00001913/PANSSCG00001965/PANSSCG00002056/PANSSCG00002108/PANSSCG00002111/PANSSCG00002407/PANSSCG00002470/PANSSCG00002548…	96
GO:0031090	organelle membrane	103/539	111/18682	3.57199e-152	1.14967e-150	3.72898e-151	PANSSCG00000871/PANSSCG00000915/PANSSCG00000950/PANSSCG00000999/PANSSCG00001007/PANSSCG00001179/PANSSCG00001217/PANSSCG00001247/PANSSCG00001425/PANSSCG00001549/PANSSCG00001619/PANSSCG00001625/PANSSCG00001632/PANSSCG00001654/PANSSCG00001655/PANSSCG00001659/PANSSCG00001678/PANSSCG00001747/PANSSCG00001768/PANSSCG00001800/PANSSCG00001818/PANSSCG00001849/PANSSCG00001867/PANSSCG00001885/PANSSCG00001963…	103
GO:0002376	immune system process	105/539	117/18682	3.10477e-151	9.89093e-150	3.20816e-150	PANSSCG00000143/PANSSCG00000144/PANSSCG00000880/PANSSCG00001023/PANSSCG00001179/PANSSCG00001197/PANSSCG00001248/PANSSCG00001629/PANSSCG00001645/PANSSCG00001650/PANSSCG00001654/PANSSCG00001675/PANSSCG00001678/PANSSCG00001684/PANSSCG00001706/PANSSCG00001741/PANSSCG00001800/PANSSCG00001818/PANSSCG00001840/PANSSCG00001867/PANSSCG00001917/PANSSCG00001963/PANSSCG00002044/PANSSCG00002048/PANSSCG00002056…	105
GO:0044271	cellular nitrogen compound biosynthetic process	95/539	95/18682	9.79874e-151	3.09007e-149	1.00227e-149	PANSSCG00000563/PANSSCG00000950/PANSSCG00000970/PANSSCG00000985/PANSSCG00000999/PANSSCG00001023/PANSSCG00001217/PANSSCG00001247/PANSSCG00001248/PANSSCG00001425/PANSSCG00001578/PANSSCG00001625/PANSSCG00001629/PANSSCG00001645/PANSSCG00001649/PANSSCG00001650/PANSSCG00001654/PANSSCG00001655/PANSSCG00001659/PANSSCG00001670/PANSSCG00001677/PANSSCG00001885/PANSSCG00001886/PANSSCG00001906/PANSSCG00001926…	95
GO:0009605	response to external stimulus	94/539	94/18682	4.09301e-149	1.27784e-147	4.14471e-148	PANSSCG00000143/PANSSCG00000880/PANSSCG00001629/PANSSCG00001637/PANSSCG00001649/PANSSCG00001650/PANSSCG00001663/PANSSCG00001674/PANSSCG00001675/PANSSCG00001694/PANSSCG00001706/PANSSCG00001714/PANSSCG00001741/PANSSCG00001796/PANSSCG00001810/PANSSCG00001885/PANSSCG00001887/PANSSCG00001963/PANSSCG00001983/PANSSCG00002044/PANSSCG00002056/PANSSCG00002092/PANSSCG00002105/PANSSCG00002111/PANSSCG00002272…	94
GO:0031326	regulation of cellular biosynthetic process	93/539	93/18682	1.70594e-147	5.27322e-146	1.71039e-146	PANSSCG00000563/PANSSCG00001023/PANSSCG00001179/PANSSCG00001502/PANSSCG00001549/PANSSCG00001622/PANSSCG00001634/PANSSCG00001654/PANSSCG00001663/PANSSCG00001679/PANSSCG00001741/PANSSCG00001800/PANSSCG00001805/PANSSCG00001833/PANSSCG00001849/PANSSCG00001884/PANSSCG00001885/PANSSCG00001963/PANSSCG00001965/PANSSCG00002105/PANSSCG00002108/PANSSCG00002111/PANSSCG00002407/PANSSCG00002470/PANSSCG00002536…	93
GO:0051246	regulation of protein metabolic process	100/539	108/18682	2.17161e-147	6.64684e-146	2.15593e-146	PANSSCG00000740/PANSSCG00000880/PANSSCG00001023/PANSSCG00001248/PANSSCG00001549/PANSSCG00001634/PANSSCG00001636/PANSSCG00001654/PANSSCG00001675/PANSSCG00001678/PANSSCG00001737/PANSSCG00001741/PANSSCG00001884/PANSSCG00001885/PANSSCG00001887/PANSSCG00001913/PANSSCG00001917/PANSSCG00001977/PANSSCG00002056/PANSSCG00002108/PANSSCG00002111/PANSSCG00002171/PANSSCG00002273/PANSSCG00002360/PANSSCG00002383…	100
GO:0033036	macromolecule localization	94/539	95/18682	3.79625e-147	1.15067e-145	3.73224e-146	PANSSCG00000880/PANSSCG00000950/PANSSCG00000970/PANSSCG00000999/PANSSCG00001023/PANSSCG00001179/PANSSCG00001217/PANSSCG00001425/PANSSCG00001549/PANSSCG00001578/PANSSCG00001619/PANSSCG00001625/PANSSCG00001629/PANSSCG00001642/PANSSCG00001649/PANSSCG00001650/PANSSCG00001654/PANSSCG00001655/PANSSCG00001657/PANSSCG00001658/PANSSCG00001663/PANSSCG00001678/PANSSCG00001679/PANSSCG00001694/PANSSCG00001706…	94
GO:0044459	obsolete plasma membrane part	91/539	91/18682	2.94416e-144	8.83813e-143	2.86668e-143	PANSSCG00000871/PANSSCG00000915/PANSSCG00001549/PANSSCG00001617/PANSSCG00001632/PANSSCG00001654/PANSSCG00001694/PANSSCG00001706/PANSSCG00001714/PANSSCG00001750/PANSSCG00001796/PANSSCG00001800/PANSSCG00001818/PANSSCG00001849/PANSSCG00001867/PANSSCG00001916/PANSSCG00001942/PANSSCG00001947/PANSSCG00001971/PANSSCG00001983/PANSSCG00002003/PANSSCG00002025/PANSSCG00002056/PANSSCG00002092/PANSSCG00002111…	91
GO:0071702	organic substance transport	93/539	95/18682	7.2597e-144	2.15855e-142	7.00133e-143	PANSSCG00000871/PANSSCG00000880/PANSSCG00000915/PANSSCG00000950/PANSSCG00000970/PANSSCG00000999/PANSSCG00001023/PANSSCG00001179/PANSSCG00001217/PANSSCG00001425/PANSSCG00001549/PANSSCG00001578/PANSSCG00001619/PANSSCG00001625/PANSSCG00001629/PANSSCG00001632/PANSSCG00001642/PANSSCG00001649/PANSSCG00001650/PANSSCG00001654/PANSSCG00001655/PANSSCG00001657/PANSSCG00001658/PANSSCG00001663/PANSSCG00001678…	93
GO:0010604	positive regulation of macromolecule metabolic process	90/539	90/18682	1.2191e-142	3.55705e-141	1.15374e-141	PANSSCG00000563/PANSSCG00000880/PANSSCG00001248/PANSSCG00001549/PANSSCG00001637/PANSSCG00001654/PANSSCG00001663/PANSSCG00001670/PANSSCG00001675/PANSSCG00001678/PANSSCG00001679/PANSSCG00001737/PANSSCG00001741/PANSSCG00001800/PANSSCG00001885/PANSSCG00001887/PANSSCG00001913/PANSSCG00001965/PANSSCG00002056/PANSSCG00002108/PANSSCG00002111/PANSSCG00002407/PANSSCG00002470/PANSSCG00002548/PANSSCG00002552…	90
GO:0120025	plasma membrane bounded cell projection	90/539	90/18682	1.2191e-142	3.55705e-141	1.15374e-141	PANSSCG00001549/PANSSCG00001550/PANSSCG00001582/PANSSCG00001583/PANSSCG00001617/PANSSCG00001632/PANSSCG00001637/PANSSCG00001645/PANSSCG00001654/PANSSCG00001679/PANSSCG00001750/PANSSCG00001800/PANSSCG00001867/PANSSCG00001947/PANSSCG00001965/PANSSCG00001983/PANSSCG00001999/PANSSCG00002003/PANSSCG00002092/PANSSCG00002111/PANSSCG00002272/PANSSCG00002540/PANSSCG00002548/PANSSCG00002555/PANSSCG00002633…	90
GO:0009719	response to endogenous stimulus	89/539	89/18682	5.03706e-141	1.44273e-139	4.67953e-140	PANSSCG00000880/PANSSCG00001007/PANSSCG00001023/PANSSCG00001179/PANSSCG00001197/PANSSCG00001549/PANSSCG00001617/PANSSCG00001631/PANSSCG00001637/PANSSCG00001663/PANSSCG00001674/PANSSCG00001675/PANSSCG00001679/PANSSCG00001694/PANSSCG00001714/PANSSCG00001796/PANSSCG00001849/PANSSCG00001885/PANSSCG00001886/PANSSCG00001963/PANSSCG00001974/PANSSCG00001983/PANSSCG00001999/PANSSCG00002105/PANSSCG00002111…	89
GO:0019219	regulation of nucleobase-containing compound metabolic process	89/539	89/18682	5.03706e-141	1.44273e-139	4.67953e-140	PANSSCG00000563/PANSSCG00001217/PANSSCG00001502/PANSSCG00001549/PANSSCG00001622/PANSSCG00001634/PANSSCG00001654/PANSSCG00001663/PANSSCG00001670/PANSSCG00001679/PANSSCG00001741/PANSSCG00001800/PANSSCG00001805/PANSSCG00001833/PANSSCG00001849/PANSSCG00001884/PANSSCG00001885/PANSSCG00001963/PANSSCG00001965/PANSSCG00002105/PANSSCG00002108/PANSSCG00002111/PANSSCG00002407/PANSSCG00002536/PANSSCG00002548…	89
GO:0071310	cellular response to organic substance	102/539	122/18682	1.09376e-139	3.10429e-138	1.00689e-138	PANSSCG00000142/PANSSCG00000143/PANSSCG00000144/PANSSCG00000145/PANSSCG00000880/PANSSCG00001023/PANSSCG00001549/PANSSCG00001617/PANSSCG00001637/PANSSCG00001654/PANSSCG00001663/PANSSCG00001674/PANSSCG00001675/PANSSCG00001678/PANSSCG00001679/PANSSCG00001694/PANSSCG00001714/PANSSCG00001741/PANSSCG00001796/PANSSCG00001810/PANSSCG00001885/PANSSCG00001886/PANSSCG00001963/PANSSCG00001983/PANSSCG00001999…	102
GO:0043933	protein-containing complex subunit organization	89/539	90/18682	4.42486e-139	1.24454e-137	4.03671e-138	PANSSCG00001023/PANSSCG00001179/PANSSCG00001248/PANSSCG00001484/PANSSCG00001485/PANSSCG00001625/PANSSCG00001634/PANSSCG00001645/PANSSCG00001649/PANSSCG00001654/PANSSCG00001655/PANSSCG00001659/PANSSCG00001675/PANSSCG00001677/PANSSCG00001694/PANSSCG00001730/PANSSCG00001810/PANSSCG00001867/PANSSCG00001945/PANSSCG00001963/PANSSCG00001971/PANSSCG00002044/PANSSCG00002242/PANSSCG00002296/PANSSCG00002386…	89
GO:0032268	regulation of cellular protein metabolic process	91/539	96/18682	1.59508e-136	4.44628e-135	1.44217e-135	PANSSCG00000740/PANSSCG00000880/PANSSCG00001023/PANSSCG00001248/PANSSCG00001549/PANSSCG00001634/PANSSCG00001654/PANSSCG00001675/PANSSCG00001678/PANSSCG00001737/PANSSCG00001741/PANSSCG00001884/PANSSCG00001885/PANSSCG00001887/PANSSCG00001913/PANSSCG00001977/PANSSCG00002056/PANSSCG00002108/PANSSCG00002111/PANSSCG00002171/PANSSCG00002273/PANSSCG00002383/PANSSCG00002470/PANSSCG00002548/PANSSCG00002552…	91
GO:0010556	regulation of macromolecule biosynthetic process	86/539	86/18682	3.50714e-136	9.68963e-135	3.14287e-135	PANSSCG00000563/PANSSCG00001023/PANSSCG00001502/PANSSCG00001549/PANSSCG00001622/PANSSCG00001634/PANSSCG00001654/PANSSCG00001663/PANSSCG00001679/PANSSCG00001741/PANSSCG00001800/PANSSCG00001805/PANSSCG00001833/PANSSCG00001849/PANSSCG00001884/PANSSCG00001885/PANSSCG00001963/PANSSCG00001965/PANSSCG00002105/PANSSCG00002108/PANSSCG00002111/PANSSCG00002407/PANSSCG00002536/PANSSCG00002548/PANSSCG00002552…	86
GO:0051173	positive regulation of nitrogen compound metabolic process	88/539	90/18682	7.92302e-136	2.1698e-134	7.03781e-135	PANSSCG00000563/PANSSCG00000880/PANSSCG00001248/PANSSCG00001549/PANSSCG00001654/PANSSCG00001663/PANSSCG00001670/PANSSCG00001675/PANSSCG00001678/PANSSCG00001679/PANSSCG00001737/PANSSCG00001741/PANSSCG00001800/PANSSCG00001885/PANSSCG00001887/PANSSCG00001913/PANSSCG00001965/PANSSCG00002056/PANSSCG00002108/PANSSCG00002111/PANSSCG00002407/PANSSCG00002470/PANSSCG00002548/PANSSCG00002552/PANSSCG00002561…	88
GO:1901575	organic substance catabolic process	85/539	85/18682	1.43661e-134	3.90009e-133	1.26501e-133	PANSSCG00000950/PANSSCG00000970/PANSSCG00000999/PANSSCG00001217/PANSSCG00001248/PANSSCG00001425/PANSSCG00001578/PANSSCG00001625/PANSSCG00001629/PANSSCG00001631/PANSSCG00001645/PANSSCG00001649/PANSSCG00001650/PANSSCG00001654/PANSSCG00001655/PANSSCG00001672/PANSSCG00001878/PANSSCG00001892/PANSSCG00001974/PANSSCG00002043/PANSSCG00002214/PANSSCG00002272/PANSSCG00002273/PANSSCG00002354/PANSSCG00002394…	85
GO:0051704	multi-organism process	84/539	84/18682	5.87212e-133	1.58041e-131	5.12611e-132	PANSSCG00000143/PANSSCG00000880/PANSSCG00001248/PANSSCG00001549/PANSSCG00001629/PANSSCG00001641/PANSSCG00001650/PANSSCG00001654/PANSSCG00001670/PANSSCG00001674/PANSSCG00001675/PANSSCG00001679/PANSSCG00001694/PANSSCG00001741/PANSSCG00001810/PANSSCG00001916/PANSSCG00001983/PANSSCG00001999/PANSSCG00002044/PANSSCG00002056/PANSSCG00002092/PANSSCG00002105/PANSSCG00002108/PANSSCG00002111/PANSSCG00002273…	84
GO:0090304	nucleic acid metabolic process	83/539	83/18682	2.39508e-131	6.39097e-130	2.07293e-130	PANSSCG00000563/PANSSCG00000950/PANSSCG00000970/PANSSCG00000985/PANSSCG00000999/PANSSCG00001023/PANSSCG00001217/PANSSCG00001248/PANSSCG00001425/PANSSCG00001549/PANSSCG00001578/PANSSCG00001625/PANSSCG00001629/PANSSCG00001641/PANSSCG00001649/PANSSCG00001650/PANSSCG00001654/PANSSCG00001655/PANSSCG00001663/PANSSCG00001670/PANSSCG00001677/PANSSCG00001679/PANSSCG00001730/PANSSCG00001810/PANSSCG00001885…	83
GO:0051049	regulation of transport	84/539	85/18682	4.87063e-131	1.28865e-129	4.17979e-130	PANSSCG00000143/PANSSCG00000880/PANSSCG00001179/PANSSCG00001549/PANSSCG00001582/PANSSCG00001583/PANSSCG00001654/PANSSCG00001694/PANSSCG00001706/PANSSCG00001707/PANSSCG00001741/PANSSCG00001800/PANSSCG00001818/PANSSCG00001849/PANSSCG00001867/PANSSCG00001885/PANSSCG00001887/PANSSCG00001913/PANSSCG00001917/PANSSCG00001965/PANSSCG00001983/PANSSCG00002092/PANSSCG00002111/PANSSCG00002325/PANSSCG00002470…	84
GO:0097708	intracellular vesicle	89/539	96/18682	5.0672e-131	1.3294e-129	4.31194e-130	PANSSCG00001179/PANSSCG00001549/PANSSCG00001582/PANSSCG00001583/PANSSCG00001632/PANSSCG00001645/PANSSCG00001654/PANSSCG00001674/PANSSCG00001675/PANSSCG00001678/PANSSCG00001679/PANSSCG00001694/PANSSCG00001714/PANSSCG00001796/PANSSCG00001800/PANSSCG00001818/PANSSCG00001840/PANSSCG00001849/PANSSCG00001867/PANSSCG00001878/PANSSCG00001963/PANSSCG00001965/PANSSCG00001977/PANSSCG00002044/PANSSCG00002116…	89
GO:0044421	obsolete extracellular region part	82/539	82/18682	9.74802e-130	2.51515e-128	8.15798e-129	PANSSCG00000142/PANSSCG00000143/PANSSCG00000144/PANSSCG00000145/PANSSCG00000880/PANSSCG00001625/PANSSCG00001629/PANSSCG00001636/PANSSCG00001650/PANSSCG00001655/PANSSCG00001674/PANSSCG00001675/PANSSCG00001678/PANSSCG00001741/PANSSCG00001887/PANSSCG00001892/PANSSCG00001917/PANSSCG00001936/PANSSCG00001945/PANSSCG00001963/PANSSCG00002044/PANSSCG00002273/PANSSCG00002360/PANSSCG00002470/PANSSCG00002759…	82
GO:1901566	organonitrogen compound biosynthetic process	82/539	82/18682	9.74802e-130	2.51515e-128	8.15798e-129	PANSSCG00000613/PANSSCG00000950/PANSSCG00000970/PANSSCG00000999/PANSSCG00001023/PANSSCG00001217/PANSSCG00001247/PANSSCG00001425/PANSSCG00001578/PANSSCG00001625/PANSSCG00001629/PANSSCG00001645/PANSSCG00001649/PANSSCG00001650/PANSSCG00001655/PANSSCG00001659/PANSSCG00001677/PANSSCG00001694/PANSSCG00001768/PANSSCG00001886/PANSSCG00001974/PANSSCG00001999/PANSSCG00002053/PANSSCG00002394/PANSSCG00002419…	82
GO:0031324	negative regulation of cellular metabolic process	83/539	84/18682	1.96313e-129	5.02367e-128	1.62945e-128	PANSSCG00000563/PANSSCG00000740/PANSSCG00001023/PANSSCG00001217/PANSSCG00001502/PANSSCG00001634/PANSSCG00001654/PANSSCG00001663/PANSSCG00001884/PANSSCG00001885/PANSSCG00001913/PANSSCG00001977/PANSSCG00002056/PANSSCG00002105/PANSSCG00002108/PANSSCG00002111/PANSSCG00002171/PANSSCG00002273/PANSSCG00002354/PANSSCG00002383/PANSSCG00002552/PANSSCG00002559/PANSSCG00002744/PANSSCG00002919/PANSSCG00002954…	83
GO:0031224	intrinsic component of membrane	88/539	96/18682	2.2676e-128	5.75564e-127	1.86686e-127	PANSSCG00000613/PANSSCG00000871/PANSSCG00000915/PANSSCG00001179/PANSSCG00001549/PANSSCG00001617/PANSSCG00001619/PANSSCG00001632/PANSSCG00001694/PANSSCG00001706/PANSSCG00001707/PANSSCG00001714/PANSSCG00001750/PANSSCG00001768/PANSSCG00001796/PANSSCG00001849/PANSSCG00001867/PANSSCG00001916/PANSSCG00001961/PANSSCG00001971/PANSSCG00002025/PANSSCG00002034/PANSSCG00002056/PANSSCG00002092/PANSSCG00002132…	88
GO:2000112	regulation of cellular macromolecule biosynthetic process	81/539	81/18682	3.95901e-128	9.96778e-127	3.23308e-127	PANSSCG00000563/PANSSCG00001023/PANSSCG00001502/PANSSCG00001549/PANSSCG00001622/PANSSCG00001634/PANSSCG00001654/PANSSCG00001663/PANSSCG00001679/PANSSCG00001741/PANSSCG00001805/PANSSCG00001833/PANSSCG00001849/PANSSCG00001884/PANSSCG00001885/PANSSCG00001963/PANSSCG00002105/PANSSCG00002108/PANSSCG00002111/PANSSCG00002407/PANSSCG00002536/PANSSCG00002548/PANSSCG00002552/PANSSCG00002744/PANSSCG00003068…	81
GO:0051252	regulation of RNA metabolic process	82/539	84/18682	3.23518e-126	8.0802e-125	2.62084e-125	PANSSCG00000563/PANSSCG00001217/PANSSCG00001502/PANSSCG00001549/PANSSCG00001634/PANSSCG00001663/PANSSCG00001670/PANSSCG00001679/PANSSCG00001741/PANSSCG00001800/PANSSCG00001805/PANSSCG00001833/PANSSCG00001849/PANSSCG00001884/PANSSCG00001885/PANSSCG00001963/PANSSCG00001965/PANSSCG00002105/PANSSCG00002108/PANSSCG00002111/PANSSCG00002407/PANSSCG00002536/PANSSCG00002548/PANSSCG00002552/PANSSCG00002578…	82
GO:0043412	macromolecule modification	79/539	79/18682	6.48872e-125	1.60776e-123	5.21483e-124	PANSSCG00000613/PANSSCG00001248/PANSSCG00001549/PANSSCG00001622/PANSSCG00001639/PANSSCG00001641/PANSSCG00001677/PANSSCG00001694/PANSSCG00001731/PANSSCG00001741/PANSSCG00001768/PANSSCG00001936/PANSSCG00002048/PANSSCG00002105/PANSSCG00002108/PANSSCG00002111/PANSSCG00002296/PANSSCG00002407/PANSSCG00002470/PANSSCG00002515/PANSSCG00002536/PANSSCG00002552/PANSSCG00002579/PANSSCG00002697/PANSSCG00002771…	79
GO:0009059	macromolecule biosynthetic process	78/539	78/18682	2.61857e-123	6.43715e-122	2.08791e-122	PANSSCG00000563/PANSSCG00000613/PANSSCG00000950/PANSSCG00000970/PANSSCG00000985/PANSSCG00000999/PANSSCG00001023/PANSSCG00001217/PANSSCG00001248/PANSSCG00001425/PANSSCG00001578/PANSSCG00001625/PANSSCG00001629/PANSSCG00001649/PANSSCG00001650/PANSSCG00001654/PANSSCG00001655/PANSSCG00001659/PANSSCG00001670/PANSSCG00001677/PANSSCG00001694/PANSSCG00001768/PANSSCG00001885/PANSSCG00001886/PANSSCG00001906…	78
GO:0051649	establishment of localization in cell	82/539	87/18682	3.1854e-122	7.76938e-121	2.52003e-121	PANSSCG00000950/PANSSCG00000970/PANSSCG00000999/PANSSCG00001217/PANSSCG00001247/PANSSCG00001425/PANSSCG00001549/PANSSCG00001578/PANSSCG00001619/PANSSCG00001625/PANSSCG00001629/PANSSCG00001642/PANSSCG00001649/PANSSCG00001650/PANSSCG00001655/PANSSCG00001657/PANSSCG00001663/PANSSCG00001679/PANSSCG00001694/PANSSCG00001706/PANSSCG00001730/PANSSCG00001906/PANSSCG00001926/PANSSCG00001963/PANSSCG00001965…	82
GO:0043168	anion binding	77/539	77/18682	1.05451e-121	2.53246e-120	8.21411e-121	PANSSCG00001179/PANSSCG00001549/PANSSCG00001550/PANSSCG00001617/PANSSCG00001631/PANSSCG00001637/PANSSCG00001654/PANSSCG00001658/PANSSCG00001674/PANSSCG00001677/PANSSCG00001678/PANSSCG00001679/PANSSCG00001694/PANSSCG00001849/PANSSCG00001977/PANSSCG00002003/PANSSCG00002044/PANSSCG00002111/PANSSCG00002354/PANSSCG00002394/PANSSCG00002407/PANSSCG00002436/PANSSCG00002517/PANSSCG00002540/PANSSCG00002771…	77
GO:0051172	negative regulation of nitrogen compound metabolic process	77/539	77/18682	1.05451e-121	2.53246e-120	8.21411e-121	PANSSCG00000563/PANSSCG00000740/PANSSCG00001023/PANSSCG00001217/PANSSCG00001502/PANSSCG00001634/PANSSCG00001654/PANSSCG00001663/PANSSCG00001884/PANSSCG00001885/PANSSCG00001977/PANSSCG00002056/PANSSCG00002105/PANSSCG00002108/PANSSCG00002111/PANSSCG00002171/PANSSCG00002273/PANSSCG00002383/PANSSCG00002552/PANSSCG00002559/PANSSCG00002744/PANSSCG00002919/PANSSCG00002954/PANSSCG00003025/PANSSCG00003119…	77
GO:0010468	regulation of gene expression	131/539	311/18682	7.09573e-121	1.69106e-119	5.48501e-120	PANSSCG00000563/PANSSCG00000740/PANSSCG00000950/PANSSCG00000970/PANSSCG00000999/PANSSCG00001023/PANSSCG00001217/PANSSCG00001425/PANSSCG00001502/PANSSCG00001549/PANSSCG00001578/PANSSCG00001625/PANSSCG00001629/PANSSCG00001634/PANSSCG00001636/PANSSCG00001637/PANSSCG00001641/PANSSCG00001649/PANSSCG00001650/PANSSCG00001655/PANSSCG00001663/PANSSCG00001670/PANSSCG00001679/PANSSCG00001741/PANSSCG00001805…	131
GO:0043436	oxoacid metabolic process	76/539	76/18682	4.23764e-120	1.00227e-118	3.25089e-119	PANSSCG00000880/PANSSCG00001007/PANSSCG00001023/PANSSCG00001631/PANSSCG00001645/PANSSCG00001677/PANSSCG00001974/PANSSCG00001999/PANSSCG00002043/PANSSCG00002044/PANSSCG00002053/PANSSCG00002214/PANSSCG00002272/PANSSCG00002325/PANSSCG00002354/PANSSCG00002394/PANSSCG00002407/PANSSCG00002419/PANSSCG00002517/PANSSCG00002561/PANSSCG00002697/PANSSCG00002771/PANSSCG00002833/PANSSCG00002888/PANSSCG00002908…	76
GO:0048584	positive regulation of response to stimulus	75/539	75/18682	1.69935e-118	3.989e-117	1.29385e-117	PANSSCG00000880/PANSSCG00001248/PANSSCG00001549/PANSSCG00001654/PANSSCG00001675/PANSSCG00001678/PANSSCG00001684/PANSSCG00001706/PANSSCG00001737/PANSSCG00001741/PANSSCG00001818/PANSSCG00001913/PANSSCG00001917/PANSSCG00001963/PANSSCG00001965/PANSSCG00001983/PANSSCG00002056/PANSSCG00002092/PANSSCG00002111/PANSSCG00002470/PANSSCG00002513/PANSSCG00002548/PANSSCG00002552/PANSSCG00002744/PANSSCG00002907…	75
GO:0009966	regulation of signal transduction	93/539	126/18682	1.82219e-117	4.24544e-116	1.37702e-116	PANSSCG00000142/PANSSCG00000143/PANSSCG00000144/PANSSCG00000145/PANSSCG00000880/PANSSCG00001248/PANSSCG00001549/PANSSCG00001550/PANSSCG00001654/PANSSCG00001678/PANSSCG00001694/PANSSCG00001706/PANSSCG00001737/PANSSCG00001741/PANSSCG00001818/PANSSCG00001884/PANSSCG00001913/PANSSCG00001936/PANSSCG00001963/PANSSCG00001965/PANSSCG00001983/PANSSCG00002056/PANSSCG00002062/PANSSCG00002111/PANSSCG00002273…	93
GO:0050793	regulation of developmental process	78/539	82/18682	4.14797e-117	9.59257e-116	3.11138e-116	PANSSCG00000145/PANSSCG00000880/PANSSCG00001248/PANSSCG00001549/PANSSCG00001550/PANSSCG00001654/PANSSCG00001674/PANSSCG00001675/PANSSCG00001694/PANSSCG00001741/PANSSCG00001965/PANSSCG00001983/PANSSCG00002092/PANSSCG00002111/PANSSCG00002132/PANSSCG00002470/PANSSCG00002540/PANSSCG00002571/PANSSCG00002971/PANSSCG00003001/PANSSCG00003119/PANSSCG00003324/PANSSCG00003441/PANSSCG00003463/PANSSCG00003567…	78
GO:0034645	cellular macromolecule biosynthetic process	77/539	80/18682	8.0422e-117	1.84616e-115	5.98808e-116	PANSSCG00000563/PANSSCG00000613/PANSSCG00000950/PANSSCG00000970/PANSSCG00000985/PANSSCG00000999/PANSSCG00001023/PANSSCG00001217/PANSSCG00001248/PANSSCG00001425/PANSSCG00001578/PANSSCG00001625/PANSSCG00001629/PANSSCG00001649/PANSSCG00001650/PANSSCG00001654/PANSSCG00001655/PANSSCG00001659/PANSSCG00001670/PANSSCG00001677/PANSSCG00001694/PANSSCG00001768/PANSSCG00001885/PANSSCG00001886/PANSSCG00001906…	77
GO:0003008	system process	73/539	73/18682	2.7156e-115	6.09937e-114	1.97835e-114	PANSSCG00000880/PANSSCG00001197/PANSSCG00001549/PANSSCG00001628/PANSSCG00001637/PANSSCG00001684/PANSSCG00001706/PANSSCG00001714/PANSSCG00001731/PANSSCG00001796/PANSSCG00001867/PANSSCG00001887/PANSSCG00001894/PANSSCG00001948/PANSSCG00001983/PANSSCG00001999/PANSSCG00002111/PANSSCG00002354/PANSSCG00002559/PANSSCG00002833/PANSSCG00002837/PANSSCG00002883/PANSSCG00002954/PANSSCG00003029/PANSSCG00003031…	73
GO:0006793	phosphorus metabolic process	73/539	73/18682	2.7156e-115	6.09937e-114	1.97835e-114	PANSSCG00000613/PANSSCG00001179/PANSSCG00001247/PANSSCG00001622/PANSSCG00001645/PANSSCG00001656/PANSSCG00001672/PANSSCG00001679/PANSSCG00001731/PANSSCG00001741/PANSSCG00001867/PANSSCG00001936/PANSSCG00001942/PANSSCG00001974/PANSSCG00002048/PANSSCG00002053/PANSSCG00002108/PANSSCG00002111/PANSSCG00002242/PANSSCG00002325/PANSSCG00002394/PANSSCG00002407/PANSSCG00002419/PANSSCG00002436/PANSSCG00002552…	73
GO:1901698	response to nitrogen compound	73/539	73/18682	2.7156e-115	6.09937e-114	1.97835e-114	PANSSCG00000880/PANSSCG00001007/PANSSCG00001023/PANSSCG00001549/PANSSCG00001617/PANSSCG00001637/PANSSCG00001645/PANSSCG00001654/PANSSCG00001675/PANSSCG00001694/PANSSCG00001714/PANSSCG00001796/PANSSCG00001885/PANSSCG00001886/PANSSCG00001963/PANSSCG00001974/PANSSCG00001999/PANSSCG00002105/PANSSCG00002111/PANSSCG00002394/PANSSCG00002407/PANSSCG00002548/PANSSCG00002701/PANSSCG00002883/PANSSCG00003088…	73
GO:0042995	cell projection	93/539	131/18682	9.57894e-115	2.1361e-113	6.92853e-114	PANSSCG00001549/PANSSCG00001550/PANSSCG00001582/PANSSCG00001583/PANSSCG00001617/PANSSCG00001632/PANSSCG00001637/PANSSCG00001645/PANSSCG00001654/PANSSCG00001679/PANSSCG00001750/PANSSCG00001800/PANSSCG00001867/PANSSCG00001947/PANSSCG00001965/PANSSCG00001977/PANSSCG00001983/PANSSCG00001999/PANSSCG00002003/PANSSCG00002062/PANSSCG00002092/PANSSCG00002111/PANSSCG00002272/PANSSCG00002540/PANSSCG00002548…	93
GO:0097458	obsolete neuron part	72/539	72/18682	1.08217e-113	2.39613e-112	7.77192e-113	PANSSCG00001549/PANSSCG00001617/PANSSCG00001625/PANSSCG00001632/PANSSCG00001645/PANSSCG00001654/PANSSCG00001655/PANSSCG00001800/PANSSCG00001867/PANSSCG00001965/PANSSCG00001971/PANSSCG00001983/PANSSCG00001999/PANSSCG00002003/PANSSCG00002092/PANSSCG00002108/PANSSCG00002111/PANSSCG00002272/PANSSCG00002540/PANSSCG00002623/PANSSCG00002633/PANSSCG00003031/PANSSCG00003088/PANSSCG00003119/PANSSCG00003132…	72
GO:0036211	protein modification process	73/539	74/18682	1.95991e-113	4.30903e-112	1.39765e-112	PANSSCG00000613/PANSSCG00001248/PANSSCG00001622/PANSSCG00001639/PANSSCG00001641/PANSSCG00001694/PANSSCG00001731/PANSSCG00001741/PANSSCG00001768/PANSSCG00001936/PANSSCG00002048/PANSSCG00002108/PANSSCG00002111/PANSSCG00002296/PANSSCG00002407/PANSSCG00002470/PANSSCG00002515/PANSSCG00002536/PANSSCG00002552/PANSSCG00002579/PANSSCG00002697/PANSSCG00002771/PANSSCG00002926/PANSSCG00002971/PANSSCG00003025…	73
GO:0006082	organic acid metabolic process	76/539	81/18682	9.58794e-113	2.09325e-111	6.78954e-112	PANSSCG00000880/PANSSCG00001007/PANSSCG00001023/PANSSCG00001631/PANSSCG00001645/PANSSCG00001677/PANSSCG00001974/PANSSCG00001999/PANSSCG00002043/PANSSCG00002044/PANSSCG00002053/PANSSCG00002214/PANSSCG00002272/PANSSCG00002325/PANSSCG00002354/PANSSCG00002394/PANSSCG00002407/PANSSCG00002419/PANSSCG00002517/PANSSCG00002561/PANSSCG00002697/PANSSCG00002771/PANSSCG00002833/PANSSCG00002888/PANSSCG00002908…	76
GO:0098588	bounding membrane of organelle	71/539	71/18682	4.30348e-112	9.33019e-111	3.02628e-111	PANSSCG00000950/PANSSCG00000999/PANSSCG00001179/PANSSCG00001217/PANSSCG00001425/PANSSCG00001549/PANSSCG00001619/PANSSCG00001625/PANSSCG00001632/PANSSCG00001654/PANSSCG00001655/PANSSCG00001678/PANSSCG00001747/PANSSCG00001768/PANSSCG00001800/PANSSCG00001818/PANSSCG00001849/PANSSCG00001867/PANSSCG00001885/PANSSCG00001963/PANSSCG00001977/PANSSCG00002296/PANSSCG00002386/PANSSCG00002394/PANSSCG00002513…	71
GO:0071705	nitrogen compound transport	73/539	75/18682	7.16808e-112	1.54336e-110	5.00595e-111	PANSSCG00000880/PANSSCG00000950/PANSSCG00000970/PANSSCG00000999/PANSSCG00001179/PANSSCG00001217/PANSSCG00001425/PANSSCG00001549/PANSSCG00001578/PANSSCG00001619/PANSSCG00001625/PANSSCG00001629/PANSSCG00001632/PANSSCG00001642/PANSSCG00001649/PANSSCG00001650/PANSSCG00001654/PANSSCG00001655/PANSSCG00001657/PANSSCG00001658/PANSSCG00001663/PANSSCG00001678/PANSSCG00001679/PANSSCG00001694/PANSSCG00001707…	73
GO:0014070	response to organic cyclic compound	73/539	78/18682	5.0589e-108	1.08177e-106	3.50877e-107	PANSSCG00000880/PANSSCG00001007/PANSSCG00001549/PANSSCG00001617/PANSSCG00001631/PANSSCG00001637/PANSSCG00001645/PANSSCG00001654/PANSSCG00001674/PANSSCG00001675/PANSSCG00001679/PANSSCG00001849/PANSSCG00001885/PANSSCG00001963/PANSSCG00001999/PANSSCG00002105/PANSSCG00002111/PANSSCG00002214/PANSSCG00002272/PANSSCG00002394/PANSSCG00002407/PANSSCG00002470/PANSSCG00002517/PANSSCG00002548/PANSSCG00002833…	73
GO:0006796	phosphate-containing compound metabolic process	73/539	79/18682	6.4963e-107	1.37969e-105	4.47507e-106	PANSSCG00000613/PANSSCG00001179/PANSSCG00001247/PANSSCG00001622/PANSSCG00001645/PANSSCG00001656/PANSSCG00001672/PANSSCG00001679/PANSSCG00001731/PANSSCG00001741/PANSSCG00001867/PANSSCG00001936/PANSSCG00001942/PANSSCG00001974/PANSSCG00002048/PANSSCG00002053/PANSSCG00002108/PANSSCG00002111/PANSSCG00002242/PANSSCG00002325/PANSSCG00002394/PANSSCG00002407/PANSSCG00002419/PANSSCG00002436/PANSSCG00002552…	73
GO:0009725	response to hormone	76/539	87/18682	9.02681e-107	1.90417e-105	6.17624e-106	PANSSCG00000880/PANSSCG00001007/PANSSCG00001023/PANSSCG00001179/PANSSCG00001197/PANSSCG00001549/PANSSCG00001617/PANSSCG00001631/PANSSCG00001637/PANSSCG00001674/PANSSCG00001675/PANSSCG00001679/PANSSCG00001714/PANSSCG00001796/PANSSCG00001849/PANSSCG00001885/PANSSCG00001963/PANSSCG00001974/PANSSCG00001999/PANSSCG00002105/PANSSCG00002272/PANSSCG00002394/PANSSCG00002407/PANSSCG00002470/PANSSCG00002517…	76
GO:0030154	cell differentiation	103/539	197/18682	9.89799e-107	2.07393e-105	6.72686e-106	PANSSCG00000563/PANSSCG00001197/PANSSCG00001248/PANSSCG00001582/PANSSCG00001583/PANSSCG00001625/PANSSCG00001632/PANSSCG00001637/PANSSCG00001645/PANSSCG00001654/PANSSCG00001655/PANSSCG00001674/PANSSCG00001678/PANSSCG00001679/PANSSCG00001731/PANSSCG00001800/PANSSCG00001811/PANSSCG00001867/PANSSCG00001885/PANSSCG00001887/PANSSCG00001936/PANSSCG00001942/PANSSCG00001972/PANSSCG00001983/PANSSCG00002092…	103
GO:0010243	response to organonitrogen compound	68/539	69/18682	1.79829e-105	3.71805e-104	1.20596e-104	PANSSCG00000880/PANSSCG00001007/PANSSCG00001023/PANSSCG00001549/PANSSCG00001617/PANSSCG00001637/PANSSCG00001645/PANSSCG00001654/PANSSCG00001675/PANSSCG00001694/PANSSCG00001714/PANSSCG00001796/PANSSCG00001885/PANSSCG00001886/PANSSCG00001963/PANSSCG00001974/PANSSCG00001999/PANSSCG00002105/PANSSCG00002111/PANSSCG00002394/PANSSCG00002407/PANSSCG00002548/PANSSCG00002701/PANSSCG00002883/PANSSCG00003088…	68
GO:1903506	regulation of nucleic acid-templated transcription	68/539	69/18682	1.79829e-105	3.71805e-104	1.20596e-104	PANSSCG00000563/PANSSCG00001502/PANSSCG00001549/PANSSCG00001634/PANSSCG00001679/PANSSCG00001741/PANSSCG00001800/PANSSCG00001805/PANSSCG00001833/PANSSCG00001849/PANSSCG00001884/PANSSCG00001885/PANSSCG00001963/PANSSCG00001965/PANSSCG00002105/PANSSCG00002108/PANSSCG00002111/PANSSCG00002407/PANSSCG00002536/PANSSCG00002548/PANSSCG00002552/PANSSCG00002744/PANSSCG00003068/PANSSCG00003181/PANSSCG00003298…	68
GO:0051128	regulation of cellular component organization	69/539	72/18682	3.73986e-104	7.68147e-103	2.49151e-103	PANSSCG00000145/PANSSCG00001550/PANSSCG00001634/PANSSCG00001663/PANSSCG00001674/PANSSCG00001694/PANSSCG00001818/PANSSCG00001884/PANSSCG00001885/PANSSCG00001887/PANSSCG00001913/PANSSCG00001917/PANSSCG00001965/PANSSCG00001977/PANSSCG00001983/PANSSCG00002062/PANSSCG00002108/PANSSCG00002111/PANSSCG00002132/PANSSCG00002470/PANSSCG00002540/PANSSCG00002571/PANSSCG00003025/PANSSCG00003119/PANSSCG00003132…	69
GO:0043603	cellular amide metabolic process	66/539	66/18682	4.14881e-104	8.30294e-103	2.69309e-103	PANSSCG00000950/PANSSCG00000970/PANSSCG00000999/PANSSCG00001023/PANSSCG00001179/PANSSCG00001217/PANSSCG00001425/PANSSCG00001578/PANSSCG00001625/PANSSCG00001629/PANSSCG00001649/PANSSCG00001650/PANSSCG00001654/PANSSCG00001655/PANSSCG00001657/PANSSCG00001659/PANSSCG00001677/PANSSCG00001886/PANSSCG00001945/PANSSCG00002419/PANSSCG00002552/PANSSCG00002617/PANSSCG00002618/PANSSCG00002685/PANSSCG00002771…	66
GO:0044463	obsolete cell projection part	66/539	66/18682	4.14881e-104	8.30294e-103	2.69309e-103	PANSSCG00001549/PANSSCG00001617/PANSSCG00001632/PANSSCG00001654/PANSSCG00001800/PANSSCG00001867/PANSSCG00001947/PANSSCG00001983/PANSSCG00001999/PANSSCG00002111/PANSSCG00002272/PANSSCG00002540/PANSSCG00002548/PANSSCG00002555/PANSSCG00002633/PANSSCG00003031/PANSSCG00003068/PANSSCG00003088/PANSSCG00003119/PANSSCG00003132/PANSSCG00003181/PANSSCG00003324/PANSSCG00003553/PANSSCG00003585/PANSSCG00003593…	66
GO:0098772	molecular function regulator	66/539	66/18682	4.14881e-104	8.30294e-103	2.69309e-103	PANSSCG00000142/PANSSCG00000143/PANSSCG00000144/PANSSCG00000145/PANSSCG00000880/PANSSCG00001248/PANSSCG00001550/PANSSCG00001632/PANSSCG00001654/PANSSCG00001678/PANSSCG00001707/PANSSCG00001714/PANSSCG00001737/PANSSCG00001741/PANSSCG00001747/PANSSCG00001796/PANSSCG00001867/PANSSCG00001885/PANSSCG00001936/PANSSCG00001947/PANSSCG00002062/PANSSCG00002171/PANSSCG00002273/PANSSCG00002354/PANSSCG00002383…	66
GO:0120038	obsolete plasma membrane bounded cell projection part	66/539	66/18682	4.14881e-104	8.30294e-103	2.69309e-103	PANSSCG00001549/PANSSCG00001617/PANSSCG00001632/PANSSCG00001654/PANSSCG00001800/PANSSCG00001867/PANSSCG00001947/PANSSCG00001983/PANSSCG00001999/PANSSCG00002111/PANSSCG00002272/PANSSCG00002540/PANSSCG00002548/PANSSCG00002555/PANSSCG00002633/PANSSCG00003031/PANSSCG00003068/PANSSCG00003088/PANSSCG00003119/PANSSCG00003132/PANSSCG00003181/PANSSCG00003324/PANSSCG00003553/PANSSCG00003585/PANSSCG00003593…	66
GO:0046907	intracellular transport	73/539	82/18682	6.35365e-104	1.26345e-102	4.09803e-103	PANSSCG00000950/PANSSCG00000970/PANSSCG00000999/PANSSCG00001217/PANSSCG00001247/PANSSCG00001425/PANSSCG00001549/PANSSCG00001578/PANSSCG00001619/PANSSCG00001625/PANSSCG00001629/PANSSCG00001642/PANSSCG00001649/PANSSCG00001650/PANSSCG00001655/PANSSCG00001657/PANSSCG00001663/PANSSCG00001679/PANSSCG00001694/PANSSCG00001730/PANSSCG00001906/PANSSCG00001926/PANSSCG00001963/PANSSCG00001965/PANSSCG00001977…	73
GO:0010467	gene expression	87/539	131/18682	4.42433e-103	8.74225e-102	2.83558e-102	PANSSCG00000563/PANSSCG00000950/PANSSCG00000970/PANSSCG00000985/PANSSCG00000999/PANSSCG00001023/PANSSCG00001217/PANSSCG00001248/PANSSCG00001425/PANSSCG00001578/PANSSCG00001625/PANSSCG00001629/PANSSCG00001642/PANSSCG00001649/PANSSCG00001650/PANSSCG00001655/PANSSCG00001657/PANSSCG00001659/PANSSCG00001663/PANSSCG00001670/PANSSCG00001677/PANSSCG00001730/PANSSCG00001810/PANSSCG00001885/PANSSCG00001886…	87
GO:0044433	obsolete cytoplasmic vesicle part	65/539	65/18682	1.6295e-102	3.19956e-101	1.03779e-101	PANSSCG00001179/PANSSCG00001632/PANSSCG00001645/PANSSCG00001654/PANSSCG00001678/PANSSCG00001800/PANSSCG00001818/PANSSCG00001840/PANSSCG00001849/PANSSCG00001867/PANSSCG00001963/PANSSCG00001965/PANSSCG00001977/PANSSCG00002044/PANSSCG00002296/PANSSCG00002383/PANSSCG00002470/PANSSCG00002536/PANSSCG00002540/PANSSCG00002552/PANSSCG00002578/PANSSCG00002623/PANSSCG00002633/PANSSCG00003001/PANSSCG00003119…	65
GO:2001141	regulation of RNA biosynthetic process	69/539	74/18682	9.60467e-102	1.87411e-100	6.07875e-101	PANSSCG00000563/PANSSCG00001502/PANSSCG00001549/PANSSCG00001634/PANSSCG00001679/PANSSCG00001741/PANSSCG00001800/PANSSCG00001805/PANSSCG00001833/PANSSCG00001849/PANSSCG00001884/PANSSCG00001885/PANSSCG00001963/PANSSCG00001965/PANSSCG00002105/PANSSCG00002108/PANSSCG00002111/PANSSCG00002407/PANSSCG00002536/PANSSCG00002548/PANSSCG00002552/PANSSCG00002744/PANSSCG00003068/PANSSCG00003181/PANSSCG00003298…	69
GO:0044432	obsolete endoplasmic reticulum part	64/539	64/18682	6.38696e-101	1.22332e-99	3.96788e-100	PANSSCG00000613/PANSSCG00000950/PANSSCG00000999/PANSSCG00001007/PANSSCG00001179/PANSSCG00001217/PANSSCG00001425/PANSSCG00001625/PANSSCG00001655/PANSSCG00001656/PANSSCG00001672/PANSSCG00001694/PANSSCG00001864/PANSSCG00001885/PANSSCG00001969/PANSSCG00002034/PANSSCG00002151/PANSSCG00002162/PANSSCG00002214/PANSSCG00002354/PANSSCG00002394/PANSSCG00002419/PANSSCG00002470/PANSSCG00002548/PANSSCG00002552…	64
GO:0070727	cellular macromolecule localization	64/539	64/18682	6.38696e-101	1.22332e-99	3.96788e-100	PANSSCG00000950/PANSSCG00000970/PANSSCG00000999/PANSSCG00001217/PANSSCG00001425/PANSSCG00001578/PANSSCG00001619/PANSSCG00001625/PANSSCG00001629/PANSSCG00001642/PANSSCG00001649/PANSSCG00001650/PANSSCG00001655/PANSSCG00001657/PANSSCG00001679/PANSSCG00001706/PANSSCG00001818/PANSSCG00001906/PANSSCG00001926/PANSSCG00001936/PANSSCG00001963/PANSSCG00001983/PANSSCG00002151/PANSSCG00002171/PANSSCG00002296…	64
GO:0098805	whole membrane	64/539	64/18682	6.38696e-101	1.22332e-99	3.96788e-100	PANSSCG00001179/PANSSCG00001549/PANSSCG00001619/PANSSCG00001632/PANSSCG00001654/PANSSCG00001678/PANSSCG00001694/PANSSCG00001747/PANSSCG00001800/PANSSCG00001818/PANSSCG00001849/PANSSCG00001867/PANSSCG00001963/PANSSCG00001977/PANSSCG00002296/PANSSCG00002386/PANSSCG00002513/PANSSCG00002540/PANSSCG00002552/PANSSCG00002623/PANSSCG00002633/PANSSCG00003031/PANSSCG00003074/PANSSCG00003223/PANSSCG00003229…	64
GO:0042886	amide transport	63/539	63/18682	2.4983e-99	4.7559e-98	1.54259e-98	PANSSCG00000880/PANSSCG00000950/PANSSCG00000970/PANSSCG00000999/PANSSCG00001179/PANSSCG00001217/PANSSCG00001425/PANSSCG00001549/PANSSCG00001578/PANSSCG00001619/PANSSCG00001625/PANSSCG00001629/PANSSCG00001642/PANSSCG00001649/PANSSCG00001650/PANSSCG00001654/PANSSCG00001655/PANSSCG00001657/PANSSCG00001658/PANSSCG00001678/PANSSCG00001679/PANSSCG00001694/PANSSCG00001707/PANSSCG00001887/PANSSCG00001906…	63
GO:0019752	carboxylic acid metabolic process	74/539	92/18682	2.54778e-98	4.82071e-97	1.56361e-97	PANSSCG00000880/PANSSCG00001007/PANSSCG00001023/PANSSCG00001631/PANSSCG00001645/PANSSCG00001677/PANSSCG00001974/PANSSCG00001999/PANSSCG00002043/PANSSCG00002053/PANSSCG00002214/PANSSCG00002272/PANSSCG00002325/PANSSCG00002354/PANSSCG00002394/PANSSCG00002407/PANSSCG00002419/PANSSCG00002517/PANSSCG00002561/PANSSCG00002697/PANSSCG00002771/PANSSCG00002833/PANSSCG00002888/PANSSCG00002908/PANSSCG00003068…	74
GO:0042592	homeostatic process	66/539	70/18682	3.43722e-98	6.46445e-97	2.09677e-97	PANSSCG00000880/PANSSCG00001179/PANSSCG00001197/PANSSCG00001549/PANSSCG00001617/PANSSCG00001654/PANSSCG00001694/PANSSCG00001706/PANSSCG00001714/PANSSCG00001796/PANSSCG00001840/PANSSCG00001849/PANSSCG00001916/PANSSCG00002034/PANSSCG00002111/PANSSCG00002407/PANSSCG00002548/PANSSCG00002559/PANSSCG00002759/PANSSCG00002833/PANSSCG00002883/PANSSCG00002954/PANSSCG00003031/PANSSCG00003068/PANSSCG00003223…	66
GO:0031982	vesicle	92/539	167/18682	5.66331e-98	1.05873e-96	3.43404e-97	PANSSCG00000880/PANSSCG00001179/PANSSCG00001549/PANSSCG00001582/PANSSCG00001583/PANSSCG00001632/PANSSCG00001645/PANSSCG00001654/PANSSCG00001674/PANSSCG00001675/PANSSCG00001678/PANSSCG00001679/PANSSCG00001694/PANSSCG00001714/PANSSCG00001796/PANSSCG00001800/PANSSCG00001818/PANSSCG00001840/PANSSCG00001849/PANSSCG00001867/PANSSCG00001878/PANSSCG00001963/PANSSCG00001965/PANSSCG00001977/PANSSCG00002044…	92
GO:0031399	regulation of protein modification process	62/539	62/18682	9.75226e-98	1.80157e-96	5.84346e-97	PANSSCG00000880/PANSSCG00001549/PANSSCG00001634/PANSSCG00001654/PANSSCG00001675/PANSSCG00001678/PANSSCG00001737/PANSSCG00001741/PANSSCG00001884/PANSSCG00001885/PANSSCG00001887/PANSSCG00001913/PANSSCG00002056/PANSSCG00002108/PANSSCG00002111/PANSSCG00002171/PANSSCG00002273/PANSSCG00002470/PANSSCG00002548/PANSSCG00002552/PANSSCG00002559/PANSSCG00002954/PANSSCG00002971/PANSSCG00003001/PANSSCG00003025…	62
GO:0033554	cellular response to stress	62/539	62/18682	9.75226e-98	1.80157e-96	5.84346e-97	PANSSCG00001649/PANSSCG00001663/PANSSCG00001741/PANSSCG00001885/PANSSCG00001945/PANSSCG00001963/PANSSCG00001971/PANSSCG00002044/PANSSCG00002056/PANSSCG00002105/PANSSCG00002111/PANSSCG00002386/PANSSCG00002407/PANSSCG00002513/PANSSCG00002515/PANSSCG00002536/PANSSCG00002548/PANSSCG00002552/PANSSCG00002697/PANSSCG00002883/PANSSCG00002926/PANSSCG00002971/PANSSCG00003074/PANSSCG00003181/PANSSCG00003320…	62
GO:0046903	secretion	64/539	67/18682	2.83483e-96	5.20608e-95	1.68861e-95	PANSSCG00000880/PANSSCG00001179/PANSSCG00001549/PANSSCG00001645/PANSSCG00001654/PANSSCG00001678/PANSSCG00001694/PANSSCG00001714/PANSSCG00001796/PANSSCG00001800/PANSSCG00001818/PANSSCG00001840/PANSSCG00001867/PANSSCG00001963/PANSSCG00001965/PANSSCG00002044/PANSSCG00002048/PANSSCG00002383/PANSSCG00002470/PANSSCG00002536/PANSSCG00002578/PANSSCG00003001/PANSSCG00003031/PANSSCG00003119/PANSSCG00003537…	64
GO:0019220	regulation of phosphate metabolic process	61/539	61/18682	3.7991e-96	6.85594e-95	2.22375e-95	PANSSCG00000880/PANSSCG00001549/PANSSCG00001654/PANSSCG00001675/PANSSCG00001678/PANSSCG00001737/PANSSCG00001741/PANSSCG00001887/PANSSCG00001913/PANSSCG00002056/PANSSCG00002111/PANSSCG00002171/PANSSCG00002273/PANSSCG00002470/PANSSCG00002548/PANSSCG00002552/PANSSCG00002559/PANSSCG00002561/PANSSCG00002954/PANSSCG00002971/PANSSCG00003001/PANSSCG00003181/PANSSCG00003223/PANSSCG00003249/PANSSCG00003567…	61
GO:0051174	regulation of phosphorus metabolic process	61/539	61/18682	3.7991e-96	6.85594e-95	2.22375e-95	PANSSCG00000880/PANSSCG00001549/PANSSCG00001654/PANSSCG00001675/PANSSCG00001678/PANSSCG00001737/PANSSCG00001741/PANSSCG00001887/PANSSCG00001913/PANSSCG00002056/PANSSCG00002111/PANSSCG00002171/PANSSCG00002273/PANSSCG00002470/PANSSCG00002548/PANSSCG00002552/PANSSCG00002559/PANSSCG00002561/PANSSCG00002954/PANSSCG00002971/PANSSCG00003001/PANSSCG00003181/PANSSCG00003223/PANSSCG00003249/PANSSCG00003567…	61
GO:1901362	organic cyclic compound biosynthetic process	61/539	61/18682	3.7991e-96	6.85594e-95	2.22375e-95	PANSSCG00000563/PANSSCG00000985/PANSSCG00001247/PANSSCG00001248/PANSSCG00001645/PANSSCG00001654/PANSSCG00001670/PANSSCG00001885/PANSSCG00001906/PANSSCG00001926/PANSSCG00001974/PANSSCG00001999/PANSSCG00002053/PANSSCG00002095/PANSSCG00002394/PANSSCG00002419/PANSSCG00002436/PANSSCG00002552/PANSSCG00002561/PANSSCG00002926/PANSSCG00003068/PANSSCG00003088/PANSSCG00003156/PANSSCG00003339/PANSSCG00003380…	61
GO:0033993	response to lipid	63/539	66/18682	1.05906e-94	1.90022e-93	6.16343e-94	PANSSCG00000880/PANSSCG00001549/PANSSCG00001617/PANSSCG00001631/PANSSCG00001637/PANSSCG00001674/PANSSCG00001675/PANSSCG00001679/PANSSCG00001694/PANSSCG00001741/PANSSCG00001810/PANSSCG00001849/PANSSCG00001885/PANSSCG00001963/PANSSCG00001999/PANSSCG00002056/PANSSCG00002092/PANSSCG00002105/PANSSCG00002111/PANSSCG00002132/PANSSCG00002394/PANSSCG00002407/PANSSCG00002470/PANSSCG00002517/PANSSCG00002833…	63
GO:0010647	positive regulation of cell communication	60/539	60/18682	1.47697e-94	2.60514e-93	8.44986e-94	PANSSCG00000880/PANSSCG00001248/PANSSCG00001549/PANSSCG00001654/PANSSCG00001678/PANSSCG00001706/PANSSCG00001737/PANSSCG00001741/PANSSCG00001913/PANSSCG00001963/PANSSCG00001965/PANSSCG00001983/PANSSCG00002056/PANSSCG00002111/PANSSCG00002325/PANSSCG00002470/PANSSCG00002513/PANSSCG00002548/PANSSCG00002552/PANSSCG00002561/PANSSCG00002971/PANSSCG00003025/PANSSCG00003068/PANSSCG00003181/PANSSCG00003223…	60
GO:0023056	positive regulation of signaling	60/539	60/18682	1.47697e-94	2.60514e-93	8.44986e-94	PANSSCG00000880/PANSSCG00001248/PANSSCG00001549/PANSSCG00001654/PANSSCG00001678/PANSSCG00001706/PANSSCG00001737/PANSSCG00001741/PANSSCG00001913/PANSSCG00001963/PANSSCG00001965/PANSSCG00001983/PANSSCG00002056/PANSSCG00002111/PANSSCG00002325/PANSSCG00002470/PANSSCG00002513/PANSSCG00002548/PANSSCG00002552/PANSSCG00002561/PANSSCG00002971/PANSSCG00003025/PANSSCG00003068/PANSSCG00003181/PANSSCG00003223…	60
GO:0140096	catalytic activity, acting on a protein	60/539	60/18682	1.47697e-94	2.60514e-93	8.44986e-94	PANSSCG00001622/PANSSCG00001639/PANSSCG00001641/PANSSCG00001657/PANSSCG00001674/PANSSCG00001731/PANSSCG00001768/PANSSCG00001878/PANSSCG00001892/PANSSCG00001917/PANSSCG00001936/PANSSCG00002048/PANSSCG00002111/PANSSCG00002470/PANSSCG00002536/PANSSCG00002579/PANSSCG00002697/PANSSCG00002907/PANSSCG00002926/PANSSCG00002971/PANSSCG00003025/PANSSCG00003119/PANSSCG00003132/PANSSCG00003233/PANSSCG00003972…	60
GO:1902531	regulation of intracellular signal transduction	63/539	67/18682	1.72928e-93	3.03304e-92	9.83776e-93	PANSSCG00000880/PANSSCG00001549/PANSSCG00001550/PANSSCG00001654/PANSSCG00001678/PANSSCG00001694/PANSSCG00001737/PANSSCG00001741/PANSSCG00001884/PANSSCG00001913/PANSSCG00001936/PANSSCG00001963/PANSSCG00001965/PANSSCG00002056/PANSSCG00002062/PANSSCG00002111/PANSSCG00002273/PANSSCG00002470/PANSSCG00002513/PANSSCG00002548/PANSSCG00002552/PANSSCG00002559/PANSSCG00002697/PANSSCG00002744/PANSSCG00002954…	63
GO:0036094	small molecule binding	74/539	100/18682	2.48481e-93	4.33384e-92	1.4057e-92	PANSSCG00001179/PANSSCG00001197/PANSSCG00001549/PANSSCG00001617/PANSSCG00001631/PANSSCG00001637/PANSSCG00001654/PANSSCG00001658/PANSSCG00001677/PANSSCG00001678/PANSSCG00001679/PANSSCG00001694/PANSSCG00001741/PANSSCG00001849/PANSSCG00001963/PANSSCG00001965/PANSSCG00002003/PANSSCG00002108/PANSSCG00002111/PANSSCG00002214/PANSSCG00002354/PANSSCG00002394/PANSSCG00002407/PANSSCG00002436/PANSSCG00002517…	74
GO:0050790	regulation of catalytic activity	81/539	129/18682	8.38153e-93	1.45373e-91	4.71522e-92	PANSSCG00000880/PANSSCG00001248/PANSSCG00001549/PANSSCG00001550/PANSSCG00001654/PANSSCG00001678/PANSSCG00001741/PANSSCG00001747/PANSSCG00001750/PANSSCG00001800/PANSSCG00001885/PANSSCG00001887/PANSSCG00001983/PANSSCG00002056/PANSSCG00002062/PANSSCG00002111/PANSSCG00002171/PANSSCG00002273/PANSSCG00002354/PANSSCG00002383/PANSSCG00002394/PANSSCG00002548/PANSSCG00002552/PANSSCG00002561/PANSSCG00002919…	81
GO:0044093	positive regulation of molecular function	60/539	61/18682	8.78156e-93	1.5147e-91	4.91297e-92	PANSSCG00000880/PANSSCG00001248/PANSSCG00001549/PANSSCG00001550/PANSSCG00001654/PANSSCG00001678/PANSSCG00001679/PANSSCG00001706/PANSSCG00001741/PANSSCG00001747/PANSSCG00001885/PANSSCG00001887/PANSSCG00001963/PANSSCG00001965/PANSSCG00002048/PANSSCG00002056/PANSSCG00002062/PANSSCG00002111/PANSSCG00002394/PANSSCG00002548/PANSSCG00002552/PANSSCG00002561/PANSSCG00002971/PANSSCG00003025/PANSSCG00003181…	60
GO:0065003	protein-containing complex assembly	79/539	121/18682	1.47788e-92	2.53513e-91	8.22278e-92	PANSSCG00001023/PANSSCG00001179/PANSSCG00001248/PANSSCG00001484/PANSSCG00001485/PANSSCG00001625/PANSSCG00001645/PANSSCG00001649/PANSSCG00001654/PANSSCG00001655/PANSSCG00001675/PANSSCG00001677/PANSSCG00001694/PANSSCG00001730/PANSSCG00001810/PANSSCG00001867/PANSSCG00001945/PANSSCG00001963/PANSSCG00001971/PANSSCG00002242/PANSSCG00002394/PANSSCG00002436/PANSSCG00002548/PANSSCG00002552/PANSSCG00002697…	79
GO:1901701	cellular response to oxygen-containing compound	58/539	58/18682	2.21875e-91	3.7852e-90	1.22774e-90	PANSSCG00000880/PANSSCG00001023/PANSSCG00001549/PANSSCG00001617/PANSSCG00001674/PANSSCG00001675/PANSSCG00001694/PANSSCG00001714/PANSSCG00001796/PANSSCG00001810/PANSSCG00001885/PANSSCG00001886/PANSSCG00001971/PANSSCG00001999/PANSSCG00002044/PANSSCG00002105/PANSSCG00002111/PANSSCG00002132/PANSSCG00002394/PANSSCG00002407/PANSSCG00002548/PANSSCG00003088/PANSSCG00003181/PANSSCG00003309/PANSSCG00003576…	58
GO:0010941	regulation of cell death	63/539	69/18682	2.57015e-91	4.36087e-90	1.41446e-90	PANSSCG00000880/PANSSCG00001619/PANSSCG00001654/PANSSCG00001675/PANSSCG00001678/PANSSCG00001741/PANSSCG00001800/PANSSCG00001840/PANSSCG00001884/PANSSCG00001936/PANSSCG00001963/PANSSCG00001965/PANSSCG00001971/PANSSCG00002044/PANSSCG00002056/PANSSCG00002092/PANSSCG00002105/PANSSCG00002111/PANSSCG00002552/PANSSCG00002697/PANSSCG00002744/PANSSCG00002971/PANSSCG00003025/PANSSCG00003119/PANSSCG00003181…	63
GO:0016070	RNA metabolic process	64/539	72/18682	6.23657e-91	1.05246e-89	3.4137e-90	PANSSCG00000563/PANSSCG00000950/PANSSCG00000970/PANSSCG00000985/PANSSCG00000999/PANSSCG00001023/PANSSCG00001217/PANSSCG00001248/PANSSCG00001425/PANSSCG00001578/PANSSCG00001625/PANSSCG00001629/PANSSCG00001641/PANSSCG00001649/PANSSCG00001650/PANSSCG00001655/PANSSCG00001663/PANSSCG00001670/PANSSCG00001677/PANSSCG00001679/PANSSCG00001730/PANSSCG00001810/PANSSCG00001885/PANSSCG00001886/PANSSCG00001906…	64
GO:0015833	peptide transport	61/539	65/18682	2.32196e-90	3.89739e-89	1.26413e-89	PANSSCG00000880/PANSSCG00000950/PANSSCG00000970/PANSSCG00000999/PANSSCG00001179/PANSSCG00001217/PANSSCG00001425/PANSSCG00001549/PANSSCG00001578/PANSSCG00001619/PANSSCG00001625/PANSSCG00001629/PANSSCG00001642/PANSSCG00001649/PANSSCG00001650/PANSSCG00001654/PANSSCG00001655/PANSSCG00001657/PANSSCG00001658/PANSSCG00001679/PANSSCG00001694/PANSSCG00001707/PANSSCG00001887/PANSSCG00001906/PANSSCG00001926…	61
GO:0019438	aromatic compound biosynthetic process	57/539	57/18682	8.57347e-90	1.43136e-88	4.64266e-89	PANSSCG00000563/PANSSCG00000985/PANSSCG00001247/PANSSCG00001248/PANSSCG00001645/PANSSCG00001654/PANSSCG00001670/PANSSCG00001885/PANSSCG00001906/PANSSCG00001926/PANSSCG00001974/PANSSCG00001999/PANSSCG00002053/PANSSCG00002095/PANSSCG00002394/PANSSCG00002419/PANSSCG00002436/PANSSCG00002552/PANSSCG00002561/PANSSCG00002926/PANSSCG00003068/PANSSCG00003088/PANSSCG00003156/PANSSCG00003339/PANSSCG00003380…	57
GO:0002252	immune effector process	56/539	56/18682	3.3062e-88	5.46135e-87	1.77141e-87	PANSSCG00001179/PANSSCG00001645/PANSSCG00001654/PANSSCG00001678/PANSSCG00001684/PANSSCG00001818/PANSSCG00001840/PANSSCG00001867/PANSSCG00001917/PANSSCG00001963/PANSSCG00002044/PANSSCG00002048/PANSSCG00002111/PANSSCG00002470/PANSSCG00002536/PANSSCG00002578/PANSSCG00002907/PANSSCG00003001/PANSSCG00003029/PANSSCG00003119/PANSSCG00003132/PANSSCG00003497/PANSSCG00003537/PANSSCG00003553/PANSSCG00003585…	56
GO:2000026	regulation of multicellular organismal development	56/539	56/18682	3.3062e-88	5.46135e-87	1.77141e-87	PANSSCG00000880/PANSSCG00001248/PANSSCG00001549/PANSSCG00001674/PANSSCG00001675/PANSSCG00001741/PANSSCG00001983/PANSSCG00002092/PANSSCG00002111/PANSSCG00002132/PANSSCG00002470/PANSSCG00002540/PANSSCG00002571/PANSSCG00002971/PANSSCG00003001/PANSSCG00003119/PANSSCG00003441/PANSSCG00003463/PANSSCG00003753/PANSSCG00003882/PANSSCG00003895/PANSSCG00003980/PANSSCG00004294/PANSSCG00004333/PANSSCG00004372…	56
GO:0031984	organelle subcompartment	55/539	55/18682	1.27241e-86	2.09077e-85	6.78148e-86	PANSSCG00000613/PANSSCG00000950/PANSSCG00000999/PANSSCG00001007/PANSSCG00001179/PANSSCG00001217/PANSSCG00001425/PANSSCG00001549/PANSSCG00001625/PANSSCG00001655/PANSSCG00001656/PANSSCG00001672/PANSSCG00001694/PANSSCG00001768/PANSSCG00001864/PANSSCG00001885/PANSSCG00001969/PANSSCG00002034/PANSSCG00002116/PANSSCG00002151/PANSSCG00002214/PANSSCG00002354/PANSSCG00002394/PANSSCG00002419/PANSSCG00002548…	55
GO:0008104	protein localization	78/539	133/18682	6.92314e-86	1.13163e-84	3.67047e-85	PANSSCG00000880/PANSSCG00000950/PANSSCG00000970/PANSSCG00000999/PANSSCG00001179/PANSSCG00001217/PANSSCG00001425/PANSSCG00001549/PANSSCG00001578/PANSSCG00001619/PANSSCG00001625/PANSSCG00001629/PANSSCG00001642/PANSSCG00001649/PANSSCG00001650/PANSSCG00001654/PANSSCG00001655/PANSSCG00001657/PANSSCG00001658/PANSSCG00001679/PANSSCG00001694/PANSSCG00001706/PANSSCG00001741/PANSSCG00001818/PANSSCG00001887…	78
GO:0006464	cellular protein modification process	73/539	111/18682	7.90845e-86	1.28595e-84	4.17101e-85	PANSSCG00000613/PANSSCG00001248/PANSSCG00001622/PANSSCG00001639/PANSSCG00001641/PANSSCG00001694/PANSSCG00001731/PANSSCG00001741/PANSSCG00001768/PANSSCG00001936/PANSSCG00002048/PANSSCG00002108/PANSSCG00002111/PANSSCG00002296/PANSSCG00002407/PANSSCG00002470/PANSSCG00002515/PANSSCG00002536/PANSSCG00002552/PANSSCG00002579/PANSSCG00002697/PANSSCG00002771/PANSSCG00002926/PANSSCG00002971/PANSSCG00003025…	73
GO:0051240	positive regulation of multicellular organismal process	54/539	54/18682	4.8871e-85	7.8647e-84	2.55094e-84	PANSSCG00000144/PANSSCG00000145/PANSSCG00001549/PANSSCG00001582/PANSSCG00001583/PANSSCG00001674/PANSSCG00001706/PANSSCG00001741/PANSSCG00001983/PANSSCG00002111/PANSSCG00002132/PANSSCG00002470/PANSSCG00002571/PANSSCG00002883/PANSSCG00003001/PANSSCG00003025/PANSSCG00003181/PANSSCG00003497/PANSSCG00003638/PANSSCG00003753/PANSSCG00003882/PANSSCG00003895/PANSSCG00004006/PANSSCG00004264/PANSSCG00004333…	54
GO:0071495	cellular response to endogenous stimulus	54/539	54/18682	4.8871e-85	7.8647e-84	2.55094e-84	PANSSCG00000880/PANSSCG00001023/PANSSCG00001549/PANSSCG00001617/PANSSCG00001637/PANSSCG00001663/PANSSCG00001674/PANSSCG00001675/PANSSCG00001679/PANSSCG00001714/PANSSCG00001796/PANSSCG00001885/PANSSCG00001886/PANSSCG00001983/PANSSCG00001999/PANSSCG00002105/PANSSCG00002111/PANSSCG00002394/PANSSCG00002407/PANSSCG00002548/PANSSCG00002552/PANSSCG00002918/PANSSCG00003088/PANSSCG00003309/PANSSCG00003324…	54
GO:0018130	heterocycle biosynthetic process	53/539	53/18682	1.87329e-83	2.98388e-82	9.67832e-83	PANSSCG00000563/PANSSCG00000985/PANSSCG00001247/PANSSCG00001248/PANSSCG00001645/PANSSCG00001654/PANSSCG00001670/PANSSCG00001885/PANSSCG00001906/PANSSCG00001926/PANSSCG00001974/PANSSCG00002053/PANSSCG00002095/PANSSCG00002394/PANSSCG00002419/PANSSCG00002436/PANSSCG00002552/PANSSCG00002561/PANSSCG00002926/PANSSCG00003068/PANSSCG00003156/PANSSCG00003339/PANSSCG00003380/PANSSCG00003567/PANSSCG00003633…	53
GO:0051050	positive regulation of transport	53/539	53/18682	1.87329e-83	2.98388e-82	9.67832e-83	PANSSCG00001549/PANSSCG00001654/PANSSCG00001694/PANSSCG00001706/PANSSCG00001741/PANSSCG00001818/PANSSCG00001917/PANSSCG00001965/PANSSCG00002111/PANSSCG00002325/PANSSCG00002470/PANSSCG00002548/PANSSCG00002559/PANSSCG00002561/PANSSCG00002833/PANSSCG00002954/PANSSCG00003001/PANSSCG00003031/PANSSCG00003068/PANSSCG00003132/PANSSCG00003415/PANSSCG00003497/PANSSCG00003553/PANSSCG00003638/PANSSCG00003753…	53
GO:0099503	secretory vesicle	55/539	57/18682	1.92844e-83	3.05613e-82	9.91266e-83	PANSSCG00001179/PANSSCG00001645/PANSSCG00001654/PANSSCG00001675/PANSSCG00001678/PANSSCG00001800/PANSSCG00001818/PANSSCG00001840/PANSSCG00001867/PANSSCG00001963/PANSSCG00001965/PANSSCG00002044/PANSSCG00002296/PANSSCG00002383/PANSSCG00002470/PANSSCG00002536/PANSSCG00002578/PANSSCG00002623/PANSSCG00003001/PANSSCG00003119/PANSSCG00003537/PANSSCG00003585/PANSSCG00003638/PANSSCG00003807/PANSSCG00003912…	55
GO:0009653	anatomical structure morphogenesis	61/539	74/18682	2.85091e-82	4.49522e-81	1.45804e-81	PANSSCG00001549/PANSSCG00001582/PANSSCG00001583/PANSSCG00001637/PANSSCG00001654/PANSSCG00001672/PANSSCG00001674/PANSSCG00001731/PANSSCG00001800/PANSSCG00001936/PANSSCG00001942/PANSSCG00002062/PANSSCG00002111/PANSSCG00002132/PANSSCG00002139/PANSSCG00002548/PANSSCG00002971/PANSSCG00003031/PANSSCG00003076/PANSSCG00003119/PANSSCG00003309/PANSSCG00003363/PANSSCG00003441/PANSSCG00003463/PANSSCG00003585…	61
GO:0048585	negative regulation of response to stimulus	52/539	52/18682	7.16619e-82	1.11864e-80	3.62836e-81	PANSSCG00000143/PANSSCG00000740/PANSSCG00000880/PANSSCG00001550/PANSSCG00001675/PANSSCG00001678/PANSSCG00001706/PANSSCG00001741/PANSSCG00001884/PANSSCG00001983/PANSSCG00002056/PANSSCG00002062/PANSSCG00002111/PANSSCG00002273/PANSSCG00002548/PANSSCG00002552/PANSSCG00002559/PANSSCG00002744/PANSSCG00002954/PANSSCG00002971/PANSSCG00003181/PANSSCG00003553/PANSSCG00003753/PANSSCG00003851/PANSSCG00003882…	52
GO:0051336	regulation of hydrolase activity	52/539	52/18682	7.16619e-82	1.11864e-80	3.62836e-81	PANSSCG00001248/PANSSCG00001549/PANSSCG00001550/PANSSCG00001654/PANSSCG00001741/PANSSCG00001800/PANSSCG00001983/PANSSCG00002056/PANSSCG00002062/PANSSCG00002111/PANSSCG00002171/PANSSCG00002273/PANSSCG00002383/PANSSCG00002394/PANSSCG00002919/PANSSCG00003025/PANSSCG00003181/PANSSCG00003223/PANSSCG00003249/PANSSCG00003298/PANSSCG00003441/PANSSCG00003528/PANSSCG00003537/PANSSCG00003633/PANSSCG00003841…	52
GO:0002682	regulation of immune system process	54/539	57/18682	1.32308e-80	2.05505e-79	6.66563e-80	PANSSCG00000740/PANSSCG00001248/PANSSCG00001549/PANSSCG00001634/PANSSCG00001636/PANSSCG00001654/PANSSCG00001675/PANSSCG00001684/PANSSCG00001706/PANSSCG00001741/PANSSCG00001818/PANSSCG00001917/PANSSCG00002048/PANSSCG00002092/PANSSCG00002111/PANSSCG00002273/PANSSCG00002360/PANSSCG00002470/PANSSCG00002552/PANSSCG00002744/PANSSCG00002907/PANSSCG00003025/PANSSCG00003029/PANSSCG00003132/PANSSCG00003181…	54
GO:0009628	response to abiotic stimulus	51/539	51/18682	2.73593e-80	4.18704e-79	1.35808e-79	PANSSCG00001197/PANSSCG00001637/PANSSCG00001645/PANSSCG00001654/PANSSCG00001706/PANSSCG00001884/PANSSCG00001887/PANSSCG00001963/PANSSCG00001965/PANSSCG00001983/PANSSCG00001999/PANSSCG00002056/PANSSCG00002105/PANSSCG00002272/PANSSCG00002407/PANSSCG00002548/PANSSCG00002552/PANSSCG00002697/PANSSCG00003031/PANSSCG00003088/PANSSCG00003223/PANSSCG00003320/PANSSCG00003553/PANSSCG00003576/PANSSCG00003895…	51
GO:0009891	positive regulation of biosynthetic process	51/539	51/18682	2.73593e-80	4.18704e-79	1.35808e-79	PANSSCG00000563/PANSSCG00001179/PANSSCG00001654/PANSSCG00001663/PANSSCG00001679/PANSSCG00001800/PANSSCG00001885/PANSSCG00001965/PANSSCG00002407/PANSSCG00002548/PANSSCG00002552/PANSSCG00002561/PANSSCG00003068/PANSSCG00003298/PANSSCG00003324/PANSSCG00003567/PANSSCG00003753/PANSSCG00003882/PANSSCG00004041/PANSSCG00004143/PANSSCG00004205/PANSSCG00004489/PANSSCG00004538/PANSSCG00004596/PANSSCG00004644…	51
GO:0051186	obsolete cofactor metabolic process	51/539	51/18682	2.73593e-80	4.18704e-79	1.35808e-79	PANSSCG00001179/PANSSCG00001631/PANSSCG00001645/PANSSCG00001867/PANSSCG00001945/PANSSCG00001963/PANSSCG00001974/PANSSCG00001999/PANSSCG00002044/PANSSCG00002214/PANSSCG00002273/PANSSCG00002325/PANSSCG00002354/PANSSCG00002394/PANSSCG00002419/PANSSCG00002559/PANSSCG00002561/PANSSCG00002578/PANSSCG00002771/PANSSCG00002954/PANSSCG00003068/PANSSCG00003088/PANSSCG00003277/PANSSCG00003376/PANSSCG00003681…	51
GO:0019637	organophosphate metabolic process	52/539	53/18682	3.70067e-80	5.63585e-79	1.82801e-79	PANSSCG00000613/PANSSCG00001179/PANSSCG00001247/PANSSCG00001645/PANSSCG00001656/PANSSCG00001672/PANSSCG00001679/PANSSCG00001731/PANSSCG00001867/PANSSCG00001942/PANSSCG00001974/PANSSCG00002053/PANSSCG00002242/PANSSCG00002325/PANSSCG00002394/PANSSCG00002407/PANSSCG00002419/PANSSCG00002559/PANSSCG00002561/PANSSCG00002578/PANSSCG00002954/PANSSCG00003031/PANSSCG00003068/PANSSCG00003092/PANSSCG00003156…	52
GO:0097367	carbohydrate derivative binding	53/539	56/18682	4.80398e-79	7.28059e-78	2.36149e-78	PANSSCG00001549/PANSSCG00001617/PANSSCG00001637/PANSSCG00001654/PANSSCG00001658/PANSSCG00001674/PANSSCG00001675/PANSSCG00001678/PANSSCG00001679/PANSSCG00001694/PANSSCG00001741/PANSSCG00001849/PANSSCG00001965/PANSSCG00002003/PANSSCG00002044/PANSSCG00002111/PANSSCG00002407/PANSSCG00002436/PANSSCG00002540/PANSSCG00002883/PANSSCG00002971/PANSSCG00003025/PANSSCG00003031/PANSSCG00003068/PANSSCG00003309…	53
GO:0098827	endoplasmic reticulum subcompartment	50/539	50/18682	1.04245e-78	1.57224e-77	5.0996e-78	PANSSCG00000613/PANSSCG00000950/PANSSCG00000999/PANSSCG00001007/PANSSCG00001179/PANSSCG00001217/PANSSCG00001425/PANSSCG00001625/PANSSCG00001655/PANSSCG00001656/PANSSCG00001672/PANSSCG00001694/PANSSCG00001864/PANSSCG00001885/PANSSCG00001969/PANSSCG00002034/PANSSCG00002151/PANSSCG00002214/PANSSCG00002354/PANSSCG00002394/PANSSCG00002419/PANSSCG00002548/PANSSCG00002552/PANSSCG00002833/PANSSCG00002883…	50
GO:0043067	regulation of programmed cell death	51/539	52/18682	1.38614e-78	2.08054e-77	6.74829e-78	PANSSCG00000880/PANSSCG00001619/PANSSCG00001654/PANSSCG00001675/PANSSCG00001741/PANSSCG00001800/PANSSCG00001884/PANSSCG00001936/PANSSCG00001963/PANSSCG00001965/PANSSCG00001971/PANSSCG00002044/PANSSCG00002056/PANSSCG00002092/PANSSCG00002111/PANSSCG00002552/PANSSCG00002697/PANSSCG00002744/PANSSCG00002971/PANSSCG00003025/PANSSCG00003119/PANSSCG00003181/PANSSCG00003223/PANSSCG00003324/PANSSCG00003363…	51
GO:0032940	secretion by cell	57/539	67/18682	1.64321e-78	2.45459e-77	7.96156e-78	PANSSCG00000880/PANSSCG00001179/PANSSCG00001549/PANSSCG00001645/PANSSCG00001654/PANSSCG00001678/PANSSCG00001694/PANSSCG00001714/PANSSCG00001796/PANSSCG00001800/PANSSCG00001818/PANSSCG00001840/PANSSCG00001867/PANSSCG00001963/PANSSCG00001965/PANSSCG00002044/PANSSCG00002048/PANSSCG00002383/PANSSCG00002470/PANSSCG00002536/PANSSCG00002578/PANSSCG00003001/PANSSCG00003119/PANSSCG00003537/PANSSCG00003585…	57
GO:0006518	peptide metabolic process	52/539	55/18682	1.73907e-77	2.58541e-76	8.38588e-77	PANSSCG00000950/PANSSCG00000970/PANSSCG00000999/PANSSCG00001023/PANSSCG00001217/PANSSCG00001425/PANSSCG00001578/PANSSCG00001625/PANSSCG00001629/PANSSCG00001649/PANSSCG00001650/PANSSCG00001654/PANSSCG00001655/PANSSCG00001657/PANSSCG00001659/PANSSCG00001677/PANSSCG00001886/PANSSCG00001945/PANSSCG00002552/PANSSCG00002617/PANSSCG00002618/PANSSCG00002685/PANSSCG00002918/PANSSCG00003005/PANSSCG00003119…	52
GO:0042175	nuclear outer membrane-endoplasmic reticulum membrane network	50/539	51/18682	5.1797e-77	7.66399e-76	2.48584e-76	PANSSCG00000613/PANSSCG00000950/PANSSCG00000999/PANSSCG00001007/PANSSCG00001179/PANSSCG00001217/PANSSCG00001425/PANSSCG00001625/PANSSCG00001655/PANSSCG00001656/PANSSCG00001672/PANSSCG00001694/PANSSCG00001864/PANSSCG00001885/PANSSCG00001969/PANSSCG00002034/PANSSCG00002151/PANSSCG00002214/PANSSCG00002354/PANSSCG00002394/PANSSCG00002419/PANSSCG00002548/PANSSCG00002552/PANSSCG00002833/PANSSCG00002883…	50
GO:0031410	cytoplasmic vesicle	89/539	234/18682	2.53024e-76	3.72613e-75	1.20858e-75	PANSSCG00001179/PANSSCG00001549/PANSSCG00001582/PANSSCG00001583/PANSSCG00001632/PANSSCG00001645/PANSSCG00001654/PANSSCG00001674/PANSSCG00001675/PANSSCG00001678/PANSSCG00001679/PANSSCG00001694/PANSSCG00001714/PANSSCG00001796/PANSSCG00001800/PANSSCG00001818/PANSSCG00001840/PANSSCG00001849/PANSSCG00001867/PANSSCG00001878/PANSSCG00001963/PANSSCG00001965/PANSSCG00001977/PANSSCG00002044/PANSSCG00002116…	89
GO:0009607	response to biotic stimulus	48/539	48/18682	1.50441e-75	2.16441e-74	7.02034e-75	PANSSCG00000143/PANSSCG00000880/PANSSCG00001629/PANSSCG00001650/PANSSCG00001675/PANSSCG00001694/PANSSCG00001741/PANSSCG00001810/PANSSCG00002044/PANSSCG00002056/PANSSCG00002092/PANSSCG00002111/PANSSCG00002407/PANSSCG00002470/PANSSCG00003001/PANSSCG00003132/PANSSCG00003376/PANSSCG00003497/PANSSCG00003593/PANSSCG00003638/PANSSCG00003753/PANSSCG00003807/PANSSCG00003841/PANSSCG00003851/PANSSCG00003882…	48
GO:0031967	organelle envelope	48/539	48/18682	1.50441e-75	2.16441e-74	7.02034e-75	PANSSCG00000871/PANSSCG00000915/PANSSCG00001247/PANSSCG00001619/PANSSCG00001659/PANSSCG00001679/PANSSCG00001747/PANSSCG00001885/PANSSCG00001963/PANSSCG00001971/PANSSCG00002111/PANSSCG00002242/PANSSCG00002552/PANSSCG00003181/PANSSCG00003223/PANSSCG00003278/PANSSCG00003324/PANSSCG00003339/PANSSCG00003380/PANSSCG00003415/PANSSCG00003441/PANSSCG00003528/PANSSCG00003957/PANSSCG00004006/PANSSCG00004039…	48
GO:0031975	envelope	48/539	48/18682	1.50441e-75	2.16441e-74	7.02034e-75	PANSSCG00000871/PANSSCG00000915/PANSSCG00001247/PANSSCG00001619/PANSSCG00001659/PANSSCG00001679/PANSSCG00001747/PANSSCG00001885/PANSSCG00001963/PANSSCG00001971/PANSSCG00002111/PANSSCG00002242/PANSSCG00002552/PANSSCG00003181/PANSSCG00003223/PANSSCG00003278/PANSSCG00003324/PANSSCG00003339/PANSSCG00003380/PANSSCG00003415/PANSSCG00003441/PANSSCG00003528/PANSSCG00003957/PANSSCG00004006/PANSSCG00004039…	48
GO:0034654	nucleobase-containing compound biosynthetic process	48/539	48/18682	1.50441e-75	2.16441e-74	7.02034e-75	PANSSCG00000563/PANSSCG00000985/PANSSCG00001247/PANSSCG00001248/PANSSCG00001645/PANSSCG00001654/PANSSCG00001670/PANSSCG00001885/PANSSCG00001906/PANSSCG00001926/PANSSCG00001974/PANSSCG00002053/PANSSCG00002095/PANSSCG00002394/PANSSCG00002419/PANSSCG00002436/PANSSCG00002552/PANSSCG00002561/PANSSCG00002926/PANSSCG00003068/PANSSCG00003156/PANSSCG00003339/PANSSCG00003380/PANSSCG00003567/PANSSCG00003633…	48
GO:1901265	nucleoside phosphate binding	48/539	48/18682	1.50441e-75	2.16441e-74	7.02034e-75	PANSSCG00001549/PANSSCG00001617/PANSSCG00001637/PANSSCG00001654/PANSSCG00001658/PANSSCG00001679/PANSSCG00001694/PANSSCG00001849/PANSSCG00001963/PANSSCG00002003/PANSSCG00002108/PANSSCG00002111/PANSSCG00002407/PANSSCG00002436/PANSSCG00002517/PANSSCG00002540/PANSSCG00002883/PANSSCG00002971/PANSSCG00003031/PANSSCG00003068/PANSSCG00003069/PANSSCG00003309/PANSSCG00003841/PANSSCG00003955/PANSSCG00003957…	48
GO:0031328	positive regulation of cellular biosynthetic process	50/539	53/18682	2.25834e-74	3.23419e-73	1.04902e-73	PANSSCG00000563/PANSSCG00001179/PANSSCG00001654/PANSSCG00001663/PANSSCG00001679/PANSSCG00001800/PANSSCG00001885/PANSSCG00001965/PANSSCG00002407/PANSSCG00002548/PANSSCG00002552/PANSSCG00002561/PANSSCG00003068/PANSSCG00003298/PANSSCG00003324/PANSSCG00003567/PANSSCG00003753/PANSSCG00003882/PANSSCG00004041/PANSSCG00004143/PANSSCG00004205/PANSSCG00004489/PANSSCG00004538/PANSSCG00004596/PANSSCG00004644…	50
GO:0009967	positive regulation of signal transduction	53/539	61/18682	4.4826e-74	6.39026e-73	2.0727e-73	PANSSCG00000880/PANSSCG00001248/PANSSCG00001549/PANSSCG00001654/PANSSCG00001678/PANSSCG00001706/PANSSCG00001737/PANSSCG00001741/PANSSCG00001913/PANSSCG00001963/PANSSCG00001965/PANSSCG00001983/PANSSCG00002056/PANSSCG00002111/PANSSCG00002470/PANSSCG00002513/PANSSCG00002548/PANSSCG00002552/PANSSCG00002971/PANSSCG00003025/PANSSCG00003181/PANSSCG00003223/PANSSCG00003249/PANSSCG00003537/PANSSCG00003553…	53
GO:0048878	chemical homeostasis	49/539	51/18682	4.79704e-74	6.80744e-73	2.20802e-73	PANSSCG00001179/PANSSCG00001549/PANSSCG00001617/PANSSCG00001694/PANSSCG00001706/PANSSCG00001714/PANSSCG00001796/PANSSCG00001840/PANSSCG00001849/PANSSCG00001916/PANSSCG00002034/PANSSCG00002111/PANSSCG00002407/PANSSCG00002548/PANSSCG00002559/PANSSCG00002759/PANSSCG00002833/PANSSCG00002883/PANSSCG00002954/PANSSCG00003031/PANSSCG00003068/PANSSCG00003324/PANSSCG00003497/PANSSCG00003525/PANSSCG00003808…	49
GO:0044092	negative regulation of molecular function	47/539	47/18682	5.69811e-74	7.96321e-73	2.5829e-73	PANSSCG00000143/PANSSCG00000880/PANSSCG00001706/PANSSCG00001963/PANSSCG00001983/PANSSCG00002056/PANSSCG00002111/PANSSCG00002171/PANSSCG00002273/PANSSCG00002354/PANSSCG00002383/PANSSCG00002548/PANSSCG00002919/PANSSCG00003025/PANSSCG00003119/PANSSCG00003298/PANSSCG00003528/PANSSCG00003633/PANSSCG00003912/PANSSCG00004216/PANSSCG00004264/PANSSCG00004333/PANSSCG00004627/PANSSCG00004897/PANSSCG00004914…	47
GO:0044429	obsolete mitochondrial part	47/539	47/18682	5.69811e-74	7.96321e-73	2.5829e-73	PANSSCG00000871/PANSSCG00000915/PANSSCG00001247/PANSSCG00001619/PANSSCG00001657/PANSSCG00001659/PANSSCG00001747/PANSSCG00001963/PANSSCG00002242/PANSSCG00002272/PANSSCG00002325/PANSSCG00002552/PANSSCG00002888/PANSSCG00002908/PANSSCG00003181/PANSSCG00003223/PANSSCG00003339/PANSSCG00003380/PANSSCG00003415/PANSSCG00003441/PANSSCG00003528/PANSSCG00003547/PANSSCG00003681/PANSSCG00003832/PANSSCG00004039…	47
GO:0080134	regulation of response to stress	47/539	47/18682	5.69811e-74	7.96321e-73	2.5829e-73	PANSSCG00000740/PANSSCG00000880/PANSSCG00001636/PANSSCG00001654/PANSSCG00001675/PANSSCG00001678/PANSSCG00001741/PANSSCG00001917/PANSSCG00002111/PANSSCG00002273/PANSSCG00002296/PANSSCG00002360/PANSSCG00002470/PANSSCG00002552/PANSSCG00002697/PANSSCG00002744/PANSSCG00002907/PANSSCG00003025/PANSSCG00003132/PANSSCG00003181/PANSSCG00003223/PANSSCG00003497/PANSSCG00003681/PANSSCG00003753/PANSSCG00003851…	47
GO:0009888	tissue development	54/539	64/18682	5.71352e-74	7.96321e-73	2.5829e-73	PANSSCG00001248/PANSSCG00001549/PANSSCG00001582/PANSSCG00001583/PANSSCG00001625/PANSSCG00001637/PANSSCG00001645/PANSSCG00001655/PANSSCG00001678/PANSSCG00001800/PANSSCG00001811/PANSSCG00001942/PANSSCG00001963/PANSSCG00001972/PANSSCG00002062/PANSSCG00002111/PANSSCG00002132/PANSSCG00002548/PANSSCG00002971/PANSSCG00003031/PANSSCG00003119/PANSSCG00003309/PANSSCG00003363/PANSSCG00003441/PANSSCG00003463…	54
GO:0043207	response to external biotic stimulus	48/539	49/18682	7.18134e-74	9.96451e-73	3.23202e-73	PANSSCG00000143/PANSSCG00000880/PANSSCG00001629/PANSSCG00001650/PANSSCG00001675/PANSSCG00001694/PANSSCG00001741/PANSSCG00001810/PANSSCG00002044/PANSSCG00002056/PANSSCG00002092/PANSSCG00002111/PANSSCG00002407/PANSSCG00002470/PANSSCG00003001/PANSSCG00003132/PANSSCG00003376/PANSSCG00003497/PANSSCG00003593/PANSSCG00003638/PANSSCG00003753/PANSSCG00003807/PANSSCG00003841/PANSSCG00003851/PANSSCG00003882…	48
GO:0016192	vesicle-mediated transport	84/539	215/18682	3.88967e-73	5.37325e-72	1.74283e-72	PANSSCG00001179/PANSSCG00001550/PANSSCG00001645/PANSSCG00001654/PANSSCG00001658/PANSSCG00001678/PANSSCG00001684/PANSSCG00001694/PANSSCG00001714/PANSSCG00001796/PANSSCG00001800/PANSSCG00001818/PANSSCG00001840/PANSSCG00001867/PANSSCG00001963/PANSSCG00001965/PANSSCG00001977/PANSSCG00002044/PANSSCG00002111/PANSSCG00002116/PANSSCG00002273/PANSSCG00002296/PANSSCG00002383/PANSSCG00002470/PANSSCG00002536…	84
GO:0051247	positive regulation of protein metabolic process	52/539	60/18682	1.48939e-72	2.04841e-71	6.64408e-72	PANSSCG00000880/PANSSCG00001248/PANSSCG00001549/PANSSCG00001654/PANSSCG00001675/PANSSCG00001678/PANSSCG00001737/PANSSCG00001741/PANSSCG00001885/PANSSCG00001887/PANSSCG00001913/PANSSCG00002056/PANSSCG00002108/PANSSCG00002111/PANSSCG00002470/PANSSCG00002548/PANSSCG00002552/PANSSCG00002971/PANSSCG00003001/PANSSCG00003181/PANSSCG00003223/PANSSCG00003249/PANSSCG00003324/PANSSCG00003407/PANSSCG00003537…	52
GO:0005215	transporter activity	46/539	46/18682	2.15396e-72	2.9111e-71	9.44226e-72	PANSSCG00000871/PANSSCG00000915/PANSSCG00001617/PANSSCG00001619/PANSSCG00001632/PANSSCG00001694/PANSSCG00001706/PANSSCG00001707/PANSSCG00001849/PANSSCG00001916/PANSSCG00002034/PANSSCG00002116/PANSSCG00002282/PANSSCG00002548/PANSSCG00002759/PANSSCG00002883/PANSSCG00003031/PANSSCG00003278/PANSSCG00003380/PANSSCG00003644/PANSSCG00003655/PANSSCG00003895/PANSSCG00003899/PANSSCG00003907/PANSSCG00004111…	46
GO:0043604	amide biosynthetic process	46/539	46/18682	2.15396e-72	2.9111e-71	9.44226e-72	PANSSCG00000950/PANSSCG00000970/PANSSCG00000999/PANSSCG00001023/PANSSCG00001217/PANSSCG00001425/PANSSCG00001578/PANSSCG00001625/PANSSCG00001629/PANSSCG00001649/PANSSCG00001650/PANSSCG00001655/PANSSCG00001659/PANSSCG00001677/PANSSCG00001886/PANSSCG00002419/PANSSCG00002552/PANSSCG00002617/PANSSCG00002618/PANSSCG00002685/PANSSCG00002888/PANSSCG00002918/PANSSCG00003005/PANSSCG00003181/PANSSCG00003277…	46
GO:0045935	positive regulation of nucleobase-containing compound metabolic process	46/539	46/18682	2.15396e-72	2.9111e-71	9.44226e-72	PANSSCG00000563/PANSSCG00001654/PANSSCG00001663/PANSSCG00001670/PANSSCG00001679/PANSSCG00001800/PANSSCG00001885/PANSSCG00001965/PANSSCG00002407/PANSSCG00002548/PANSSCG00002552/PANSSCG00002561/PANSSCG00002578/PANSSCG00003068/PANSSCG00003181/PANSSCG00003298/PANSSCG00003567/PANSSCG00003753/PANSSCG00003882/PANSSCG00004041/PANSSCG00004143/PANSSCG00004205/PANSSCG00004489/PANSSCG00004596/PANSSCG00004644…	46
GO:0051241	negative regulation of multicellular organismal process	46/539	46/18682	2.15396e-72	2.9111e-71	9.44226e-72	PANSSCG00000143/PANSSCG00001549/PANSSCG00001654/PANSSCG00001674/PANSSCG00001675/PANSSCG00001706/PANSSCG00001741/PANSSCG00001977/PANSSCG00001983/PANSSCG00002092/PANSSCG00002883/PANSSCG00002926/PANSSCG00002971/PANSSCG00003119/PANSSCG00003441/PANSSCG00003638/PANSSCG00003753/PANSSCG00003851/PANSSCG00003882/PANSSCG00003895/PANSSCG00003972/PANSSCG00003980/PANSSCG00004006/PANSSCG00004455/PANSSCG00004538…	46
GO:0051248	negative regulation of protein metabolic process	47/539	48/18682	2.66439e-72	3.58544e-71	1.16295e-71	PANSSCG00000740/PANSSCG00001023/PANSSCG00001654/PANSSCG00001884/PANSSCG00001977/PANSSCG00002056/PANSSCG00002108/PANSSCG00002111/PANSSCG00002171/PANSSCG00002273/PANSSCG00002383/PANSSCG00002559/PANSSCG00002919/PANSSCG00002954/PANSSCG00003025/PANSSCG00003119/PANSSCG00003181/PANSSCG00003567/PANSSCG00003912/PANSSCG00004006/PANSSCG00004216/PANSSCG00004627/PANSSCG00004663/PANSSCG00004966/PANSSCG00005023…	47
GO:0045595	regulation of cell differentiation	57/539	77/18682	7.53948e-72	1.01023e-70	3.2767e-71	PANSSCG00000145/PANSSCG00001248/PANSSCG00001549/PANSSCG00001654/PANSSCG00001674/PANSSCG00001675/PANSSCG00001694/PANSSCG00001741/PANSSCG00001965/PANSSCG00001983/PANSSCG00002092/PANSSCG00002111/PANSSCG00002132/PANSSCG00002540/PANSSCG00002571/PANSSCG00002971/PANSSCG00003119/PANSSCG00003324/PANSSCG00003567/PANSSCG00003753/PANSSCG00003807/PANSSCG00003882/PANSSCG00003895/PANSSCG00003980/PANSSCG00004079…	57
GO:0045184	establishment of protein localization	59/539	85/18682	1.48012e-71	1.97476e-70	6.40519e-71	PANSSCG00000880/PANSSCG00000950/PANSSCG00000970/PANSSCG00000999/PANSSCG00001179/PANSSCG00001217/PANSSCG00001425/PANSSCG00001549/PANSSCG00001578/PANSSCG00001619/PANSSCG00001625/PANSSCG00001629/PANSSCG00001642/PANSSCG00001649/PANSSCG00001650/PANSSCG00001654/PANSSCG00001655/PANSSCG00001657/PANSSCG00001658/PANSSCG00001679/PANSSCG00001694/PANSSCG00001887/PANSSCG00001906/PANSSCG00001926/PANSSCG00001963…	59
GO:0044283	small molecule biosynthetic process	45/539	45/18682	8.12617e-71	1.075e-69	3.48679e-70	PANSSCG00000871/PANSSCG00000915/PANSSCG00001631/PANSSCG00001645/PANSSCG00001974/PANSSCG00002034/PANSSCG00002044/PANSSCG00002325/PANSSCG00002394/PANSSCG00002407/PANSSCG00002419/PANSSCG00002561/PANSSCG00002833/PANSSCG00002888/PANSSCG00003068/PANSSCG00003497/PANSSCG00003955/PANSSCG00004006/PANSSCG00004039/PANSSCG00004264/PANSSCG00004449/PANSSCG00004496/PANSSCG00004517/PANSSCG00004532/PANSSCG00004861…	45
GO:1901361	organic cyclic compound catabolic process	45/539	45/18682	8.12617e-71	1.075e-69	3.48679e-70	PANSSCG00000950/PANSSCG00000970/PANSSCG00000999/PANSSCG00001217/PANSSCG00001425/PANSSCG00001578/PANSSCG00001625/PANSSCG00001629/PANSSCG00001631/PANSSCG00001645/PANSSCG00001649/PANSSCG00001650/PANSSCG00001655/PANSSCG00001974/PANSSCG00002043/PANSSCG00002214/PANSSCG00002273/PANSSCG00002354/PANSSCG00002394/PANSSCG00002552/PANSSCG00002561/PANSSCG00002918/PANSSCG00003005/PANSSCG00003068/PANSSCG00003181…	45
GO:0042493	response to drug	67/539	123/18682	1.19508e-70	1.57427e-69	5.10621e-70	PANSSCG00000880/PANSSCG00001007/PANSSCG00001197/PANSSCG00001549/PANSSCG00001654/PANSSCG00001663/PANSSCG00001675/PANSSCG00001849/PANSSCG00001885/PANSSCG00001963/PANSSCG00001971/PANSSCG00001983/PANSSCG00001999/PANSSCG00002105/PANSSCG00002111/PANSSCG00002214/PANSSCG00002272/PANSSCG00002394/PANSSCG00002470/PANSSCG00002517/PANSSCG00003069/PANSSCG00003088/PANSSCG00003181/PANSSCG00003376/PANSSCG00003407…	67
GO:0042325	regulation of phosphorylation	52/539	63/18682	3.31567e-70	4.34938e-69	1.41074e-69	PANSSCG00000880/PANSSCG00001549/PANSSCG00001654/PANSSCG00001675/PANSSCG00001678/PANSSCG00001737/PANSSCG00001741/PANSSCG00001887/PANSSCG00001913/PANSSCG00002056/PANSSCG00002111/PANSSCG00002273/PANSSCG00002470/PANSSCG00002548/PANSSCG00002552/PANSSCG00002559/PANSSCG00002561/PANSSCG00002954/PANSSCG00002971/PANSSCG00003001/PANSSCG00003181/PANSSCG00003223/PANSSCG00003249/PANSSCG00003567/PANSSCG00003681…	52
GO:0044430	obsolete cytoskeletal part	44/539	44/18682	3.05971e-69	3.96365e-68	1.28562e-68	PANSSCG00001628/PANSSCG00001637/PANSSCG00001679/PANSSCG00001684/PANSSCG00001731/PANSSCG00001800/PANSSCG00001849/PANSSCG00001887/PANSSCG00001894/PANSSCG00001936/PANSSCG00001948/PANSSCG00001965/PANSSCG00002171/PANSSCG00002214/PANSSCG00002394/PANSSCG00002548/PANSSCG00002555/PANSSCG00002893/PANSSCG00002964/PANSSCG00003029/PANSSCG00003181/PANSSCG00003309/PANSSCG00003537/PANSSCG00003895/PANSSCG00003957…	44
GO:0045321	leukocyte activation	44/539	44/18682	3.05971e-69	3.96365e-68	1.28562e-68	PANSSCG00001179/PANSSCG00001645/PANSSCG00001654/PANSSCG00001678/PANSSCG00001818/PANSSCG00001840/PANSSCG00001867/PANSSCG00001963/PANSSCG00002044/PANSSCG00002048/PANSSCG00002111/PANSSCG00002470/PANSSCG00002536/PANSSCG00002578/PANSSCG00003001/PANSSCG00003119/PANSSCG00003497/PANSSCG00003537/PANSSCG00003585/PANSSCG00003622/PANSSCG00003638/PANSSCG00003681/PANSSCG00003883/PANSSCG00003912/PANSSCG00003957…	44
GO:0051094	positive regulation of developmental process	44/539	44/18682	3.05971e-69	3.96365e-68	1.28562e-68	PANSSCG00001549/PANSSCG00001654/PANSSCG00001674/PANSSCG00001741/PANSSCG00001983/PANSSCG00002111/PANSSCG00002132/PANSSCG00002470/PANSSCG00002571/PANSSCG00002971/PANSSCG00003001/PANSSCG00003324/PANSSCG00003567/PANSSCG00003753/PANSSCG00003807/PANSSCG00003882/PANSSCG00003980/PANSSCG00004333/PANSSCG00004372/PANSSCG00004455/PANSSCG00004597/PANSSCG00004638/PANSSCG00004644/PANSSCG00004676/PANSSCG00004697…	44
GO:0034613	cellular protein localization	63/539	108/18682	4.4265e-69	5.71055e-68	1.85224e-68	PANSSCG00000950/PANSSCG00000970/PANSSCG00000999/PANSSCG00001217/PANSSCG00001425/PANSSCG00001578/PANSSCG00001619/PANSSCG00001625/PANSSCG00001629/PANSSCG00001642/PANSSCG00001649/PANSSCG00001650/PANSSCG00001655/PANSSCG00001657/PANSSCG00001679/PANSSCG00001706/PANSSCG00001818/PANSSCG00001906/PANSSCG00001926/PANSSCG00001936/PANSSCG00001963/PANSSCG00001983/PANSSCG00002151/PANSSCG00002171/PANSSCG00002296…	63
GO:0032270	positive regulation of cellular protein metabolic process	52/539	65/18682	8.39385e-69	1.07842e-67	3.49789e-68	PANSSCG00000880/PANSSCG00001248/PANSSCG00001549/PANSSCG00001654/PANSSCG00001675/PANSSCG00001678/PANSSCG00001737/PANSSCG00001741/PANSSCG00001885/PANSSCG00001887/PANSSCG00001913/PANSSCG00002056/PANSSCG00002108/PANSSCG00002111/PANSSCG00002470/PANSSCG00002548/PANSSCG00002552/PANSSCG00002971/PANSSCG00003001/PANSSCG00003181/PANSSCG00003223/PANSSCG00003249/PANSSCG00003324/PANSSCG00003407/PANSSCG00003537…	52
GO:0017144	drug metabolic process	50/539	59/18682	1.03594e-68	1.3255e-67	4.29929e-68	PANSSCG00001007/PANSSCG00001179/PANSSCG00001247/PANSSCG00001631/PANSSCG00001645/PANSSCG00001731/PANSSCG00001945/PANSSCG00001963/PANSSCG00001974/PANSSCG00001999/PANSSCG00002044/PANSSCG00002214/PANSSCG00002242/PANSSCG00002354/PANSSCG00002394/PANSSCG00002517/PANSSCG00002561/PANSSCG00002578/PANSSCG00002771/PANSSCG00002833/PANSSCG00003068/PANSSCG00003069/PANSSCG00003088/PANSSCG00003223/PANSSCG00003309…	50
GO:0051707	response to other organism	47/539	51/18682	1.28231e-68	1.63403e-67	5.30005e-68	PANSSCG00000143/PANSSCG00000880/PANSSCG00001629/PANSSCG00001650/PANSSCG00001675/PANSSCG00001694/PANSSCG00001741/PANSSCG00001810/PANSSCG00002044/PANSSCG00002056/PANSSCG00002092/PANSSCG00002111/PANSSCG00002407/PANSSCG00002470/PANSSCG00003001/PANSSCG00003132/PANSSCG00003376/PANSSCG00003497/PANSSCG00003593/PANSSCG00003638/PANSSCG00003753/PANSSCG00003807/PANSSCG00003841/PANSSCG00003851/PANSSCG00003882…	47
GO:0009991	response to extracellular stimulus	45/539	47/18682	8.33472e-68	1.05776e-66	3.4309e-67	PANSSCG00000880/PANSSCG00001637/PANSSCG00001649/PANSSCG00001663/PANSSCG00001674/PANSSCG00001675/PANSSCG00001706/PANSSCG00001714/PANSSCG00001796/PANSSCG00001885/PANSSCG00001963/PANSSCG00002105/PANSSCG00002272/PANSSCG00002386/PANSSCG00002394/PANSSCG00002407/PANSSCG00002513/PANSSCG00003074/PANSSCG00003454/PANSSCG00003497/PANSSCG00003576/PANSSCG00003638/PANSSCG00003895/PANSSCG00003912/PANSSCG00003947…	45
GO:0051130	positive regulation of cellular component organization	44/539	45/18682	1.34111e-67	1.69512e-66	5.49819e-67	PANSSCG00001663/PANSSCG00001674/PANSSCG00001885/PANSSCG00001917/PANSSCG00001965/PANSSCG00001983/PANSSCG00002108/PANSSCG00002111/PANSSCG00002132/PANSSCG00002470/PANSSCG00002571/PANSSCG00003132/PANSSCG00003181/PANSSCG00003497/PANSSCG00003537/PANSSCG00003553/PANSSCG00003851/PANSSCG00003895/PANSSCG00003925/PANSSCG00004455/PANSSCG00004504/PANSSCG00004644/PANSSCG00004676/PANSSCG00004697/PANSSCG00004700…	44
GO:1901135	carbohydrate derivative metabolic process	45/539	48/18682	1.29897e-66	1.63524e-65	5.30396e-66	PANSSCG00000613/PANSSCG00001179/PANSSCG00001247/PANSSCG00001645/PANSSCG00001678/PANSSCG00001679/PANSSCG00001731/PANSSCG00001768/PANSSCG00001974/PANSSCG00001999/PANSSCG00002053/PANSSCG00002242/PANSSCG00002394/PANSSCG00002419/PANSSCG00002561/PANSSCG00002771/PANSSCG00003031/PANSSCG00003068/PANSSCG00003088/PANSSCG00003156/PANSSCG00003192/PANSSCG00003223/PANSSCG00003309/PANSSCG00003339/PANSSCG00003380…	45
GO:0031226	intrinsic component of plasma membrane	53/539	72/18682	1.34729e-66	1.68925e-65	5.47914e-66	PANSSCG00000871/PANSSCG00000915/PANSSCG00001617/PANSSCG00001694/PANSSCG00001714/PANSSCG00001750/PANSSCG00001796/PANSSCG00001867/PANSSCG00001916/PANSSCG00001971/PANSSCG00002025/PANSSCG00002056/PANSSCG00002092/PANSSCG00002132/PANSSCG00002238/PANSSCG00002282/PANSSCG00002548/PANSSCG00002623/PANSSCG00002837/PANSSCG00003031/PANSSCG00003278/PANSSCG00003644/PANSSCG00003655/PANSSCG00003686/PANSSCG00003753…	53
GO:0006928	movement of cell or subcellular component	42/539	42/18682	4.31231e-66	5.30041e-65	1.71921e-65	PANSSCG00001637/PANSSCG00001670/PANSSCG00001684/PANSSCG00001731/PANSSCG00001818/PANSSCG00001916/PANSSCG00001947/PANSSCG00001965/PANSSCG00002056/PANSSCG00002062/PANSSCG00002111/PANSSCG00002132/PANSSCG00002555/PANSSCG00002559/PANSSCG00002954/PANSSCG00003029/PANSSCG00003223/PANSSCG00003249/PANSSCG00003278/PANSSCG00003309/PANSSCG00003441/PANSSCG00003553/PANSSCG00003585/PANSSCG00003633/PANSSCG00004006…	42
GO:0009057	macromolecule catabolic process	42/539	42/18682	4.31231e-66	5.30041e-65	1.71921e-65	PANSSCG00000950/PANSSCG00000970/PANSSCG00000999/PANSSCG00001217/PANSSCG00001248/PANSSCG00001425/PANSSCG00001578/PANSSCG00001625/PANSSCG00001629/PANSSCG00001649/PANSSCG00001650/PANSSCG00001654/PANSSCG00001655/PANSSCG00001878/PANSSCG00001892/PANSSCG00002273/PANSSCG00002552/PANSSCG00002918/PANSSCG00002926/PANSSCG00003005/PANSSCG00003025/PANSSCG00003068/PANSSCG00003119/PANSSCG00003181/PANSSCG00003454…	42
GO:0055086	nucleobase-containing small molecule metabolic process	42/539	42/18682	4.31231e-66	5.30041e-65	1.71921e-65	PANSSCG00001179/PANSSCG00001247/PANSSCG00001645/PANSSCG00001679/PANSSCG00001731/PANSSCG00001867/PANSSCG00001974/PANSSCG00001999/PANSSCG00002053/PANSSCG00002242/PANSSCG00002325/PANSSCG00002394/PANSSCG00002407/PANSSCG00002419/PANSSCG00002559/PANSSCG00002561/PANSSCG00002771/PANSSCG00002954/PANSSCG00003031/PANSSCG00003068/PANSSCG00003088/PANSSCG00003156/PANSSCG00003223/PANSSCG00003309/PANSSCG00003339…	42
GO:1901652	response to peptide	42/539	42/18682	4.31231e-66	5.30041e-65	1.71921e-65	PANSSCG00001007/PANSSCG00001023/PANSSCG00001549/PANSSCG00001617/PANSSCG00001675/PANSSCG00001714/PANSSCG00001796/PANSSCG00001885/PANSSCG00001963/PANSSCG00001974/PANSSCG00001999/PANSSCG00002394/PANSSCG00002407/PANSSCG00002701/PANSSCG00002883/PANSSCG00003088/PANSSCG00003309/PANSSCG00003553/PANSSCG00003638/PANSSCG00003895/PANSSCG00003912/PANSSCG00003925/PANSSCG00004031/PANSSCG00004039/PANSSCG00004216…	42
GO:1901699	cellular response to nitrogen compound	42/539	42/18682	4.31231e-66	5.30041e-65	1.71921e-65	PANSSCG00000880/PANSSCG00001023/PANSSCG00001549/PANSSCG00001617/PANSSCG00001637/PANSSCG00001675/PANSSCG00001714/PANSSCG00001796/PANSSCG00001885/PANSSCG00001886/PANSSCG00001999/PANSSCG00002105/PANSSCG00002111/PANSSCG00002394/PANSSCG00002407/PANSSCG00002548/PANSSCG00003088/PANSSCG00003309/PANSSCG00003576/PANSSCG00003638/PANSSCG00003912/PANSSCG00003925/PANSSCG00003947/PANSSCG00004006/PANSSCG00004039…	42
GO:0032269	negative regulation of cellular protein metabolic process	46/539	51/18682	4.43775e-66	5.4332e-65	1.76228e-65	PANSSCG00000740/PANSSCG00001023/PANSSCG00001654/PANSSCG00001884/PANSSCG00001977/PANSSCG00002056/PANSSCG00002108/PANSSCG00002111/PANSSCG00002171/PANSSCG00002273/PANSSCG00002383/PANSSCG00002559/PANSSCG00002919/PANSSCG00002954/PANSSCG00003025/PANSSCG00003119/PANSSCG00003181/PANSSCG00003567/PANSSCG00003912/PANSSCG00004006/PANSSCG00004216/PANSSCG00004627/PANSSCG00004663/PANSSCG00004966/PANSSCG00005023…	46
GO:0000003	reproduction	43/539	44/18682	4.92753e-66	5.9859e-65	1.94155e-65	PANSSCG00000880/PANSSCG00001248/PANSSCG00001549/PANSSCG00001641/PANSSCG00001654/PANSSCG00001670/PANSSCG00001674/PANSSCG00001675/PANSSCG00001678/PANSSCG00001679/PANSSCG00001741/PANSSCG00001916/PANSSCG00001983/PANSSCG00002105/PANSSCG00002273/PANSSCG00002548/PANSSCG00002579/PANSSCG00002833/PANSSCG00002919/PANSSCG00002971/PANSSCG00003525/PANSSCG00003576/PANSSCG00003593/PANSSCG00003980/PANSSCG00004294…	43
GO:0002443	leukocyte mediated immunity	43/539	44/18682	4.92753e-66	5.9859e-65	1.94155e-65	PANSSCG00001179/PANSSCG00001645/PANSSCG00001654/PANSSCG00001678/PANSSCG00001818/PANSSCG00001840/PANSSCG00001867/PANSSCG00001917/PANSSCG00001963/PANSSCG00002044/PANSSCG00002048/PANSSCG00002470/PANSSCG00002536/PANSSCG00002578/PANSSCG00002907/PANSSCG00003001/PANSSCG00003119/PANSSCG00003132/PANSSCG00003537/PANSSCG00003585/PANSSCG00003638/PANSSCG00003681/PANSSCG00003753/PANSSCG00003882/PANSSCG00003912…	43
GO:0019899	enzyme binding	95/539	351/18682	1.00873e-65	1.22064e-64	3.95918e-65	PANSSCG00000950/PANSSCG00000999/PANSSCG00001023/PANSSCG00001248/PANSSCG00001632/PANSSCG00001634/PANSSCG00001654/PANSSCG00001694/PANSSCG00001706/PANSSCG00001714/PANSSCG00001737/PANSSCG00001741/PANSSCG00001796/PANSSCG00001818/PANSSCG00001885/PANSSCG00001906/PANSSCG00001926/PANSSCG00001936/PANSSCG00001942/PANSSCG00001947/PANSSCG00001963/PANSSCG00001972/PANSSCG00001977/PANSSCG00002056/PANSSCG00002111…	95
GO:0008144	drug binding	45/539	49/18682	1.54998e-65	1.86835e-64	6.06006e-65	PANSSCG00001197/PANSSCG00001617/PANSSCG00001637/PANSSCG00001639/PANSSCG00001641/PANSSCG00001654/PANSSCG00001694/PANSSCG00001849/PANSSCG00001971/PANSSCG00002111/PANSSCG00002214/PANSSCG00002354/PANSSCG00002436/PANSSCG00002517/PANSSCG00002536/PANSSCG00002579/PANSSCG00002771/PANSSCG00002883/PANSSCG00002971/PANSSCG00003031/PANSSCG00003068/PANSSCG00003069/PANSSCG00003309/PANSSCG00003638/PANSSCG00003841…	45
GO:0007399	nervous system development	69/539	153/18682	2.86757e-65	3.4433e-64	1.11684e-64	PANSSCG00000563/PANSSCG00001617/PANSSCG00001632/PANSSCG00001654/PANSSCG00001674/PANSSCG00001679/PANSSCG00001887/PANSSCG00001942/PANSSCG00001971/PANSSCG00001983/PANSSCG00002025/PANSSCG00002092/PANSSCG00002105/PANSSCG00002111/PANSSCG00002132/PANSSCG00002436/PANSSCG00002540/PANSSCG00002548/PANSSCG00002571/PANSSCG00002971/PANSSCG00003031/PANSSCG00003076/PANSSCG00003119/PANSSCG00003475/PANSSCG00003553…	69
GO:0001775	cell activation	46/539	52/18682	3.74645e-65	4.48139e-64	1.45355e-64	PANSSCG00001179/PANSSCG00001549/PANSSCG00001645/PANSSCG00001654/PANSSCG00001678/PANSSCG00001818/PANSSCG00001840/PANSSCG00001867/PANSSCG00001963/PANSSCG00002044/PANSSCG00002048/PANSSCG00002111/PANSSCG00002470/PANSSCG00002536/PANSSCG00002578/PANSSCG00003001/PANSSCG00003119/PANSSCG00003497/PANSSCG00003537/PANSSCG00003585/PANSSCG00003622/PANSSCG00003638/PANSSCG00003681/PANSSCG00003883/PANSSCG00003912…	46
GO:0031667	response to nutrient levels	44/539	47/18682	4.58474e-65	5.44241e-64	1.76527e-64	PANSSCG00000880/PANSSCG00001649/PANSSCG00001663/PANSSCG00001674/PANSSCG00001675/PANSSCG00001706/PANSSCG00001714/PANSSCG00001796/PANSSCG00001885/PANSSCG00001963/PANSSCG00002105/PANSSCG00002272/PANSSCG00002386/PANSSCG00002394/PANSSCG00002407/PANSSCG00002513/PANSSCG00003074/PANSSCG00003454/PANSSCG00003497/PANSSCG00003576/PANSSCG00003638/PANSSCG00003895/PANSSCG00003912/PANSSCG00003947/PANSSCG00004039…	44
GO:0044255	cellular lipid metabolic process	49/539	61/18682	5.04781e-65	5.96942e-64	1.9362e-64	PANSSCG00000613/PANSSCG00001007/PANSSCG00001179/PANSSCG00001656/PANSSCG00001672/PANSSCG00001678/PANSSCG00001942/PANSSCG00001963/PANSSCG00002214/PANSSCG00002354/PANSSCG00002407/PANSSCG00002419/PANSSCG00002517/PANSSCG00002559/PANSSCG00002578/PANSSCG00002833/PANSSCG00002908/PANSSCG00002954/PANSSCG00003069/PANSSCG00003092/PANSSCG00003192/PANSSCG00003497/PANSSCG00003553/PANSSCG00003582/PANSSCG00003807…	49
GO:0010557	positive regulation of macromolecule biosynthetic process	41/539	41/18682	1.61417e-64	1.88743e-63	6.12196e-64	PANSSCG00000563/PANSSCG00001654/PANSSCG00001663/PANSSCG00001679/PANSSCG00001800/PANSSCG00001885/PANSSCG00001965/PANSSCG00002407/PANSSCG00002548/PANSSCG00002552/PANSSCG00003068/PANSSCG00003298/PANSSCG00003324/PANSSCG00003567/PANSSCG00003753/PANSSCG00003882/PANSSCG00004041/PANSSCG00004143/PANSSCG00004205/PANSSCG00004489/PANSSCG00004596/PANSSCG00004644/PANSSCG00004676/PANSSCG00004729/PANSSCG00004732…	41
GO:0060341	regulation of cellular localization	41/539	41/18682	1.61417e-64	1.88743e-63	6.12196e-64	PANSSCG00001654/PANSSCG00001706/PANSSCG00001741/PANSSCG00001800/PANSSCG00001849/PANSSCG00001867/PANSSCG00001885/PANSSCG00001913/PANSSCG00001983/PANSSCG00002111/PANSSCG00002548/PANSSCG00002559/PANSSCG00002954/PANSSCG00003025/PANSSCG00003537/PANSSCG00003553/PANSSCG00003753/PANSSCG00003882/PANSSCG00004006/PANSSCG00004220/PANSSCG00004264/PANSSCG00004308/PANSSCG00004333/PANSSCG00004538/PANSSCG00004676…	41
GO:0071417	cellular response to organonitrogen compound	41/539	41/18682	1.61417e-64	1.88743e-63	6.12196e-64	PANSSCG00000880/PANSSCG00001023/PANSSCG00001549/PANSSCG00001617/PANSSCG00001637/PANSSCG00001675/PANSSCG00001714/PANSSCG00001796/PANSSCG00001885/PANSSCG00001886/PANSSCG00001999/PANSSCG00002105/PANSSCG00002111/PANSSCG00002394/PANSSCG00002407/PANSSCG00002548/PANSSCG00003088/PANSSCG00003309/PANSSCG00003576/PANSSCG00003638/PANSSCG00003912/PANSSCG00003925/PANSSCG00003947/PANSSCG00004006/PANSSCG00004039…	41
GO:0045055	regulated exocytosis	48/539	59/18682	3.1577e-64	3.67848e-63	1.19313e-63	PANSSCG00001179/PANSSCG00001645/PANSSCG00001654/PANSSCG00001678/PANSSCG00001800/PANSSCG00001818/PANSSCG00001840/PANSSCG00001867/PANSSCG00001963/PANSSCG00001965/PANSSCG00002044/PANSSCG00002383/PANSSCG00002470/PANSSCG00002536/PANSSCG00002578/PANSSCG00003001/PANSSCG00003119/PANSSCG00003537/PANSSCG00003585/PANSSCG00003638/PANSSCG00003693/PANSSCG00003768/PANSSCG00003807/PANSSCG00003912/PANSSCG00003957…	48
GO:0010035	response to inorganic substance	43/539	46/18682	1.61272e-63	1.86479e-62	6.0485e-63	PANSSCG00001007/PANSSCG00001197/PANSSCG00001631/PANSSCG00001637/PANSSCG00001663/PANSSCG00001963/PANSSCG00001971/PANSSCG00001974/PANSSCG00001999/PANSSCG00002044/PANSSCG00002105/PANSSCG00002111/PANSSCG00002214/PANSSCG00002394/PANSSCG00002470/PANSSCG00002548/PANSSCG00003088/PANSSCG00003181/PANSSCG00003376/PANSSCG00003497/PANSSCG00003525/PANSSCG00003553/PANSSCG00003576/PANSSCG00003633/PANSSCG00003681…	43
GO:0031401	positive regulation of protein modification process	43/539	46/18682	1.61272e-63	1.86479e-62	6.0485e-63	PANSSCG00000880/PANSSCG00001549/PANSSCG00001654/PANSSCG00001675/PANSSCG00001678/PANSSCG00001737/PANSSCG00001741/PANSSCG00001885/PANSSCG00001887/PANSSCG00001913/PANSSCG00002056/PANSSCG00002108/PANSSCG00002111/PANSSCG00002470/PANSSCG00002548/PANSSCG00002552/PANSSCG00002971/PANSSCG00003001/PANSSCG00003181/PANSSCG00003249/PANSSCG00003407/PANSSCG00003753/PANSSCG00003807/PANSSCG00003882/PANSSCG00003895…	43
GO:0010562	positive regulation of phosphorus metabolic process	40/539	40/18682	6.03034e-63	6.92159e-62	2.24504e-62	PANSSCG00000880/PANSSCG00001549/PANSSCG00001654/PANSSCG00001675/PANSSCG00001678/PANSSCG00001737/PANSSCG00001741/PANSSCG00001887/PANSSCG00001913/PANSSCG00002056/PANSSCG00002111/PANSSCG00002470/PANSSCG00002548/PANSSCG00002552/PANSSCG00002561/PANSSCG00002971/PANSSCG00003001/PANSSCG00003181/PANSSCG00003249/PANSSCG00003753/PANSSCG00003807/PANSSCG00003882/PANSSCG00003895/PANSSCG00003980/PANSSCG00004006…	40
GO:0045937	positive regulation of phosphate metabolic process	40/539	40/18682	6.03034e-63	6.92159e-62	2.24504e-62	PANSSCG00000880/PANSSCG00001549/PANSSCG00001654/PANSSCG00001675/PANSSCG00001678/PANSSCG00001737/PANSSCG00001741/PANSSCG00001887/PANSSCG00001913/PANSSCG00002056/PANSSCG00002111/PANSSCG00002470/PANSSCG00002548/PANSSCG00002552/PANSSCG00002561/PANSSCG00002971/PANSSCG00003001/PANSSCG00003181/PANSSCG00003249/PANSSCG00003753/PANSSCG00003807/PANSSCG00003882/PANSSCG00003895/PANSSCG00003980/PANSSCG00004006…	40
GO:0031983	vesicle lumen	39/539	39/18682	2.24847e-61	2.55263e-60	8.27955e-61	PANSSCG00001645/PANSSCG00001654/PANSSCG00001800/PANSSCG00001840/PANSSCG00001963/PANSSCG00001965/PANSSCG00002044/PANSSCG00002383/PANSSCG00002470/PANSSCG00002536/PANSSCG00002578/PANSSCG00003001/PANSSCG00003119/PANSSCG00003537/PANSSCG00003638/PANSSCG00003807/PANSSCG00003912/PANSSCG00003957/PANSSCG00004216/PANSSCG00004527/PANSSCG00004627/PANSSCG00004891/PANSSCG00005064/PANSSCG00005186/PANSSCG00005255…	39
GO:0032553	ribonucleotide binding	39/539	39/18682	2.24847e-61	2.55263e-60	8.27955e-61	PANSSCG00001549/PANSSCG00001617/PANSSCG00001637/PANSSCG00001654/PANSSCG00001658/PANSSCG00001679/PANSSCG00001694/PANSSCG00001849/PANSSCG00002003/PANSSCG00002111/PANSSCG00002407/PANSSCG00002436/PANSSCG00002540/PANSSCG00002883/PANSSCG00002971/PANSSCG00003031/PANSSCG00003068/PANSSCG00003309/PANSSCG00003841/PANSSCG00003955/PANSSCG00003957/PANSSCG00003980/PANSSCG00004006/PANSSCG00004111/PANSSCG00004308…	39
GO:0051254	positive regulation of RNA metabolic process	39/539	39/18682	2.24847e-61	2.55263e-60	8.27955e-61	PANSSCG00000563/PANSSCG00001670/PANSSCG00001679/PANSSCG00001800/PANSSCG00001885/PANSSCG00001965/PANSSCG00002407/PANSSCG00002548/PANSSCG00002552/PANSSCG00002578/PANSSCG00003068/PANSSCG00003298/PANSSCG00003567/PANSSCG00003753/PANSSCG00003882/PANSSCG00004041/PANSSCG00004143/PANSSCG00004205/PANSSCG00004489/PANSSCG00004596/PANSSCG00004644/PANSSCG00004729/PANSSCG00004732/PANSSCG00004897/PANSSCG00005064…	39
GO:0043434	response to peptide hormone	40/539	41/18682	2.40787e-61	2.71386e-60	8.80249e-61	PANSSCG00001007/PANSSCG00001023/PANSSCG00001549/PANSSCG00001675/PANSSCG00001714/PANSSCG00001796/PANSSCG00001885/PANSSCG00001963/PANSSCG00001974/PANSSCG00001999/PANSSCG00002394/PANSSCG00002407/PANSSCG00002701/PANSSCG00002883/PANSSCG00003088/PANSSCG00003309/PANSSCG00003553/PANSSCG00003638/PANSSCG00003895/PANSSCG00003912/PANSSCG00003925/PANSSCG00004031/PANSSCG00004039/PANSSCG00004216/PANSSCG00004638…	40
GO:1901565	organonitrogen compound catabolic process	40/539	41/18682	2.40787e-61	2.71386e-60	8.80249e-61	PANSSCG00001248/PANSSCG00001631/PANSSCG00001654/PANSSCG00001878/PANSSCG00001892/PANSSCG00002043/PANSSCG00002272/PANSSCG00002273/PANSSCG00002354/PANSSCG00002552/PANSSCG00002926/PANSSCG00003025/PANSSCG00003119/PANSSCG00003972/PANSSCG00004006/PANSSCG00004031/PANSSCG00004041/PANSSCG00004532/PANSSCG00004598/PANSSCG00004700/PANSSCG00004891/PANSSCG00004903/PANSSCG00004914/PANSSCG00005084/PANSSCG00005137…	40
GO:0048699	generation of neurons	44/539	51/18682	2.94643e-61	3.30891e-60	1.07326e-60	PANSSCG00000563/PANSSCG00001632/PANSSCG00001654/PANSSCG00001674/PANSSCG00001887/PANSSCG00001983/PANSSCG00002092/PANSSCG00002105/PANSSCG00002111/PANSSCG00002132/PANSSCG00002540/PANSSCG00002571/PANSSCG00003031/PANSSCG00003076/PANSSCG00003119/PANSSCG00003553/PANSSCG00003576/PANSSCG00003585/PANSSCG00003633/PANSSCG00003686/PANSSCG00003895/PANSSCG00004333/PANSSCG00004372/PANSSCG00004455/PANSSCG00004593…	44
GO:0036477	somatodendritic compartment	46/539	57/18682	2.9779e-61	3.33226e-60	1.08083e-60	PANSSCG00001549/PANSSCG00001617/PANSSCG00001625/PANSSCG00001632/PANSSCG00001654/PANSSCG00001655/PANSSCG00001800/PANSSCG00001983/PANSSCG00001999/PANSSCG00002111/PANSSCG00002272/PANSSCG00002540/PANSSCG00002633/PANSSCG00003031/PANSSCG00003088/PANSSCG00003132/PANSSCG00003324/PANSSCG00003585/PANSSCG00003633/PANSSCG00003655/PANSSCG00003899/PANSSCG00004039/PANSSCG00004052/PANSSCG00004333/PANSSCG00004372…	46
GO:0030162	regulation of proteolysis	43/539	49/18682	1.37271e-60	1.53057e-59	4.96444e-60	PANSSCG00000740/PANSSCG00001248/PANSSCG00001636/PANSSCG00001654/PANSSCG00001741/PANSSCG00001917/PANSSCG00002056/PANSSCG00002273/PANSSCG00002360/PANSSCG00002383/PANSSCG00002470/PANSSCG00002907/PANSSCG00002919/PANSSCG00003025/PANSSCG00003119/PANSSCG00003132/PANSSCG00003181/PANSSCG00003223/PANSSCG00003537/PANSSCG00003912/PANSSCG00004216/PANSSCG00004333/PANSSCG00004627/PANSSCG00004676/PANSSCG00005023…	43
GO:0001101	response to acid chemical	38/539	38/18682	8.36738e-60	9.1339e-59	2.96261e-59	PANSSCG00001549/PANSSCG00001617/PANSSCG00001674/PANSSCG00001675/PANSSCG00001694/PANSSCG00001885/PANSSCG00001963/PANSSCG00001999/PANSSCG00002105/PANSSCG00002132/PANSSCG00002394/PANSSCG00002407/PANSSCG00002517/PANSSCG00002548/PANSSCG00003069/PANSSCG00003088/PANSSCG00003309/PANSSCG00003576/PANSSCG00003638/PANSSCG00003947/PANSSCG00003955/PANSSCG00004143/PANSSCG00004205/PANSSCG00004263/PANSSCG00004372…	38
GO:0006753	nucleoside phosphate metabolic process	38/539	38/18682	8.36738e-60	9.1339e-59	2.96261e-59	PANSSCG00001179/PANSSCG00001247/PANSSCG00001645/PANSSCG00001679/PANSSCG00001731/PANSSCG00001867/PANSSCG00001974/PANSSCG00002053/PANSSCG00002242/PANSSCG00002325/PANSSCG00002394/PANSSCG00002407/PANSSCG00002419/PANSSCG00002559/PANSSCG00002561/PANSSCG00002954/PANSSCG00003031/PANSSCG00003068/PANSSCG00003156/PANSSCG00003223/PANSSCG00003309/PANSSCG00003339/PANSSCG00003380/PANSSCG00003633/PANSSCG00003841…	38
GO:0009890	negative regulation of biosynthetic process	38/539	38/18682	8.36738e-60	9.1339e-59	2.96261e-59	PANSSCG00000563/PANSSCG00001023/PANSSCG00001502/PANSSCG00001634/PANSSCG00001663/PANSSCG00001884/PANSSCG00001885/PANSSCG00002105/PANSSCG00002108/PANSSCG00002552/PANSSCG00002744/PANSSCG00003181/PANSSCG00003223/PANSSCG00003576/PANSSCG00003622/PANSSCG00003630/PANSSCG00003787/PANSSCG00003895/PANSSCG00004663/PANSSCG00004732/PANSSCG00005023/PANSSCG00005028/PANSSCG00005077/PANSSCG00005093/PANSSCG00005109…	38
GO:0010648	negative regulation of cell communication	38/539	38/18682	8.36738e-60	9.1339e-59	2.96261e-59	PANSSCG00000143/PANSSCG00000880/PANSSCG00001550/PANSSCG00001884/PANSSCG00001885/PANSSCG00002056/PANSSCG00002062/PANSSCG00002111/PANSSCG00002273/PANSSCG00002548/PANSSCG00002552/PANSSCG00002559/PANSSCG00002744/PANSSCG00002954/PANSSCG00002971/PANSSCG00003553/PANSSCG00003980/PANSSCG00004264/PANSSCG00004333/PANSSCG00004504/PANSSCG00004597/PANSSCG00004638/PANSSCG00004676/PANSSCG00005077/PANSSCG00005093…	38
GO:0023057	negative regulation of signaling	38/539	38/18682	8.36738e-60	9.1339e-59	2.96261e-59	PANSSCG00000143/PANSSCG00000880/PANSSCG00001550/PANSSCG00001884/PANSSCG00001885/PANSSCG00002056/PANSSCG00002062/PANSSCG00002111/PANSSCG00002273/PANSSCG00002548/PANSSCG00002552/PANSSCG00002559/PANSSCG00002744/PANSSCG00002954/PANSSCG00002971/PANSSCG00003553/PANSSCG00003980/PANSSCG00004264/PANSSCG00004333/PANSSCG00004504/PANSSCG00004597/PANSSCG00004638/PANSSCG00004676/PANSSCG00005077/PANSSCG00005093…	38
GO:0032555	purine ribonucleotide binding	38/539	38/18682	8.36738e-60	9.1339e-59	2.96261e-59	PANSSCG00001549/PANSSCG00001617/PANSSCG00001637/PANSSCG00001654/PANSSCG00001658/PANSSCG00001679/PANSSCG00001694/PANSSCG00001849/PANSSCG00002003/PANSSCG00002111/PANSSCG00002407/PANSSCG00002436/PANSSCG00002540/PANSSCG00002883/PANSSCG00002971/PANSSCG00003031/PANSSCG00003068/PANSSCG00003309/PANSSCG00003841/PANSSCG00003957/PANSSCG00003980/PANSSCG00004006/PANSSCG00004111/PANSSCG00004308/PANSSCG00004736…	38
GO:0002684	positive regulation of immune system process	39/539	40/18682	8.75871e-60	9.52777e-59	3.09037e-59	PANSSCG00001549/PANSSCG00001654/PANSSCG00001675/PANSSCG00001684/PANSSCG00001706/PANSSCG00001741/PANSSCG00001818/PANSSCG00001917/PANSSCG00002048/PANSSCG00002092/PANSSCG00002111/PANSSCG00002470/PANSSCG00002552/PANSSCG00002744/PANSSCG00002907/PANSSCG00003025/PANSSCG00003029/PANSSCG00003132/PANSSCG00003181/PANSSCG00003497/PANSSCG00003553/PANSSCG00003753/PANSSCG00003807/PANSSCG00003882/PANSSCG00003895…	39
GO:0060429	epithelium development	43/539	50/18682	9.54999e-60	1.03525e-58	3.35785e-59	PANSSCG00001248/PANSSCG00001549/PANSSCG00001582/PANSSCG00001583/PANSSCG00001625/PANSSCG00001645/PANSSCG00001655/PANSSCG00001678/PANSSCG00001811/PANSSCG00001942/PANSSCG00001963/PANSSCG00001972/PANSSCG00002062/PANSSCG00002111/PANSSCG00002132/PANSSCG00002548/PANSSCG00002971/PANSSCG00003031/PANSSCG00003119/PANSSCG00003441/PANSSCG00003475/PANSSCG00003693/PANSSCG00003980/PANSSCG00004006/PANSSCG00004143…	43
GO:1902494	catalytic complex	44/539	54/18682	5.62789e-59	6.07967e-58	1.97196e-58	PANSSCG00000985/PANSSCG00001248/PANSSCG00001549/PANSSCG00001617/PANSSCG00001634/PANSSCG00001663/PANSSCG00001730/PANSSCG00001810/PANSSCG00001849/PANSSCG00001916/PANSSCG00002095/PANSSCG00002242/PANSSCG00002436/PANSSCG00002536/PANSSCG00002544/PANSSCG00002555/PANSSCG00002661/PANSSCG00002697/PANSSCG00002771/PANSSCG00003068/PANSSCG00003173/PANSSCG00003233/PANSSCG00003320/PANSSCG00003582/PANSSCG00003760…	44
GO:0022414	reproductive process	43/539	51/18682	5.92975e-59	6.38368e-58	2.07057e-58	PANSSCG00000880/PANSSCG00001248/PANSSCG00001549/PANSSCG00001641/PANSSCG00001654/PANSSCG00001670/PANSSCG00001674/PANSSCG00001675/PANSSCG00001678/PANSSCG00001679/PANSSCG00001741/PANSSCG00001916/PANSSCG00001983/PANSSCG00002105/PANSSCG00002273/PANSSCG00002548/PANSSCG00002579/PANSSCG00002833/PANSSCG00002919/PANSSCG00002971/PANSSCG00003525/PANSSCG00003576/PANSSCG00003593/PANSSCG00003980/PANSSCG00004294…	43
GO:0019439	aromatic compound catabolic process	40/539	43/18682	6.87408e-59	7.34962e-58	2.38387e-58	PANSSCG00000950/PANSSCG00000970/PANSSCG00000999/PANSSCG00001217/PANSSCG00001425/PANSSCG00001578/PANSSCG00001625/PANSSCG00001629/PANSSCG00001631/PANSSCG00001645/PANSSCG00001649/PANSSCG00001650/PANSSCG00001655/PANSSCG00001974/PANSSCG00002043/PANSSCG00002214/PANSSCG00002273/PANSSCG00002354/PANSSCG00002394/PANSSCG00002552/PANSSCG00002561/PANSSCG00002918/PANSSCG00003005/PANSSCG00003068/PANSSCG00003181…	40
GO:0043043	peptide biosynthetic process	40/539	43/18682	6.87408e-59	7.34962e-58	2.38387e-58	PANSSCG00000950/PANSSCG00000970/PANSSCG00000999/PANSSCG00001023/PANSSCG00001217/PANSSCG00001425/PANSSCG00001578/PANSSCG00001625/PANSSCG00001629/PANSSCG00001649/PANSSCG00001650/PANSSCG00001655/PANSSCG00001659/PANSSCG00001677/PANSSCG00001886/PANSSCG00002552/PANSSCG00002617/PANSSCG00002618/PANSSCG00002685/PANSSCG00002918/PANSSCG00003005/PANSSCG00003181/PANSSCG00003277/PANSSCG00003324/PANSSCG00003407…	40
GO:0060205	cytoplasmic vesicle lumen	39/539	41/18682	1.74858e-58	1.86317e-57	6.04324e-58	PANSSCG00001645/PANSSCG00001654/PANSSCG00001800/PANSSCG00001840/PANSSCG00001963/PANSSCG00001965/PANSSCG00002044/PANSSCG00002383/PANSSCG00002470/PANSSCG00002536/PANSSCG00002578/PANSSCG00003001/PANSSCG00003119/PANSSCG00003537/PANSSCG00003638/PANSSCG00003807/PANSSCG00003912/PANSSCG00003957/PANSSCG00004216/PANSSCG00004527/PANSSCG00004627/PANSSCG00004891/PANSSCG00005064/PANSSCG00005186/PANSSCG00005255…	39
GO:0030141	secretory granule	54/539	95/18682	2.25893e-58	2.39877e-57	7.78049e-58	PANSSCG00001179/PANSSCG00001645/PANSSCG00001654/PANSSCG00001675/PANSSCG00001678/PANSSCG00001800/PANSSCG00001818/PANSSCG00001840/PANSSCG00001867/PANSSCG00001963/PANSSCG00001965/PANSSCG00002044/PANSSCG00002296/PANSSCG00002383/PANSSCG00002470/PANSSCG00002536/PANSSCG00002578/PANSSCG00002623/PANSSCG00003001/PANSSCG00003119/PANSSCG00003537/PANSSCG00003585/PANSSCG00003638/PANSSCG00003807/PANSSCG00003912…	54
GO:0016787	hydrolase activity	88/539	345/18682	2.30551e-58	2.43993e-57	7.91399e-58	PANSSCG00001549/PANSSCG00001617/PANSSCG00001622/PANSSCG00001654/PANSSCG00001657/PANSSCG00001658/PANSSCG00001672/PANSSCG00001674/PANSSCG00001678/PANSSCG00001679/PANSSCG00001684/PANSSCG00001694/PANSSCG00001731/PANSSCG00001849/PANSSCG00001878/PANSSCG00001892/PANSSCG00001894/PANSSCG00001916/PANSSCG00001917/PANSSCG00001942/PANSSCG00001948/PANSSCG00001963/PANSSCG00002116/PANSSCG00002162/PANSSCG00002470…	88
GO:0031327	negative regulation of cellular biosynthetic process	37/539	37/18682	3.10776e-58	3.27785e-57	1.06318e-57	PANSSCG00000563/PANSSCG00001023/PANSSCG00001502/PANSSCG00001634/PANSSCG00001663/PANSSCG00001884/PANSSCG00001885/PANSSCG00002105/PANSSCG00002108/PANSSCG00002552/PANSSCG00002744/PANSSCG00003181/PANSSCG00003223/PANSSCG00003576/PANSSCG00003622/PANSSCG00003630/PANSSCG00003787/PANSSCG00003895/PANSSCG00004663/PANSSCG00004732/PANSSCG00005023/PANSSCG00005028/PANSSCG00005093/PANSSCG00005109/PANSSCG00005187…	37
GO:0032787	monocarboxylic acid metabolic process	38/539	39/18682	3.17783e-58	3.34047e-57	1.08349e-57	PANSSCG00001007/PANSSCG00001645/PANSSCG00001974/PANSSCG00002214/PANSSCG00002325/PANSSCG00002354/PANSSCG00002394/PANSSCG00002407/PANSSCG00002419/PANSSCG00002517/PANSSCG00002561/PANSSCG00002833/PANSSCG00002908/PANSSCG00003068/PANSSCG00003069/PANSSCG00003192/PANSSCG00003223/PANSSCG00003278/PANSSCG00003832/PANSSCG00003955/PANSSCG00004449/PANSSCG00004517/PANSSCG00004527/PANSSCG00004532/PANSSCG00004914…	38
GO:0034097	response to cytokine	49/539	74/18682	7.233e-58	7.57766e-57	2.45784e-57	PANSSCG00000142/PANSSCG00000143/PANSSCG00000144/PANSSCG00000145/PANSSCG00000880/PANSSCG00001023/PANSSCG00001654/PANSSCG00001675/PANSSCG00001741/PANSSCG00001810/PANSSCG00001983/PANSSCG00002056/PANSSCG00002092/PANSSCG00002394/PANSSCG00002407/PANSSCG00002552/PANSSCG00002697/PANSSCG00003181/PANSSCG00003249/PANSSCG00003298/PANSSCG00003407/PANSSCG00003753/PANSSCG00003841/PANSSCG00003882/PANSSCG00003912…	49
GO:0043085	positive regulation of catalytic activity	48/539	71/18682	2.18419e-57	2.28062e-56	7.39726e-57	PANSSCG00000880/PANSSCG00001248/PANSSCG00001549/PANSSCG00001550/PANSSCG00001654/PANSSCG00001678/PANSSCG00001741/PANSSCG00001747/PANSSCG00001885/PANSSCG00001887/PANSSCG00002056/PANSSCG00002062/PANSSCG00002111/PANSSCG00002394/PANSSCG00002548/PANSSCG00002552/PANSSCG00002561/PANSSCG00002971/PANSSCG00003025/PANSSCG00003181/PANSSCG00003223/PANSSCG00003249/PANSSCG00003407/PANSSCG00003415/PANSSCG00003441…	48
GO:0098796	membrane protein complex	37/539	38/18682	1.14999e-56	1.1949e-55	3.8757e-56	PANSSCG00001247/PANSSCG00001549/PANSSCG00001617/PANSSCG00001619/PANSSCG00001706/PANSSCG00001849/PANSSCG00001867/PANSSCG00001916/PANSSCG00002242/PANSSCG00002883/PANSSCG00003339/PANSSCG00003380/PANSSCG00003582/PANSSCG00003655/PANSSCG00003753/PANSSCG00003882/PANSSCG00004006/PANSSCG00004467/PANSSCG00004598/PANSSCG00004638/PANSSCG00004676/PANSSCG00004685/PANSSCG00004760/PANSSCG00004841/PANSSCG00004903…	37
GO:0044445	obsolete cytosolic part	36/539	36/18682	1.15203e-56	1.1949e-55	3.8757e-56	PANSSCG00000950/PANSSCG00000999/PANSSCG00001217/PANSSCG00001425/PANSSCG00001578/PANSSCG00001625/PANSSCG00001629/PANSSCG00001649/PANSSCG00001650/PANSSCG00001655/PANSSCG00001659/PANSSCG00001886/PANSSCG00002552/PANSSCG00002617/PANSSCG00002618/PANSSCG00002918/PANSSCG00003005/PANSSCG00003068/PANSSCG00003102/PANSSCG00003156/PANSSCG00003181/PANSSCG00003407/PANSSCG00003454/PANSSCG00003613/PANSSCG00004220…	36
GO:0017076	purine nucleotide binding	38/539	41/18682	8.23716e-56	8.51537e-55	2.76199e-55	PANSSCG00001549/PANSSCG00001617/PANSSCG00001637/PANSSCG00001654/PANSSCG00001658/PANSSCG00001679/PANSSCG00001694/PANSSCG00001849/PANSSCG00002003/PANSSCG00002111/PANSSCG00002407/PANSSCG00002436/PANSSCG00002540/PANSSCG00002883/PANSSCG00002971/PANSSCG00003031/PANSSCG00003068/PANSSCG00003309/PANSSCG00003841/PANSSCG00003957/PANSSCG00003980/PANSSCG00004006/PANSSCG00004111/PANSSCG00004308/PANSSCG00004736…	38
GO:0002263	cell activation involved in immune response	36/539	37/18682	4.15065e-55	4.27668e-54	1.38715e-54	PANSSCG00001179/PANSSCG00001645/PANSSCG00001654/PANSSCG00001678/PANSSCG00001818/PANSSCG00001840/PANSSCG00001867/PANSSCG00001963/PANSSCG00002044/PANSSCG00002111/PANSSCG00002470/PANSSCG00002536/PANSSCG00002578/PANSSCG00003001/PANSSCG00003119/PANSSCG00003497/PANSSCG00003537/PANSSCG00003585/PANSSCG00003638/PANSSCG00003912/PANSSCG00003957/PANSSCG00004216/PANSSCG00004527/PANSSCG00004676/PANSSCG00005064…	36
GO:0009790	embryo development	35/539	35/18682	4.2623e-55	4.32042e-54	1.40134e-54	PANSSCG00001549/PANSSCG00001731/PANSSCG00001942/PANSSCG00002105/PANSSCG00002111/PANSSCG00002132/PANSSCG00002548/PANSSCG00002971/PANSSCG00003031/PANSSCG00003475/PANSSCG00003576/PANSSCG00003807/PANSSCG00003851/PANSSCG00003980/PANSSCG00004041/PANSSCG00004143/PANSSCG00004205/PANSSCG00004489/PANSSCG00004542/PANSSCG00004638/PANSSCG00004732/PANSSCG00004736/PANSSCG00005028/PANSSCG00005093/PANSSCG00005249…	35
GO:0010558	negative regulation of macromolecule biosynthetic process	35/539	35/18682	4.2623e-55	4.32042e-54	1.40134e-54	PANSSCG00000563/PANSSCG00001023/PANSSCG00001502/PANSSCG00001634/PANSSCG00001663/PANSSCG00001884/PANSSCG00001885/PANSSCG00002105/PANSSCG00002108/PANSSCG00002552/PANSSCG00002744/PANSSCG00003181/PANSSCG00003576/PANSSCG00003622/PANSSCG00003630/PANSSCG00003787/PANSSCG00003895/PANSSCG00004663/PANSSCG00004732/PANSSCG00005023/PANSSCG00005028/PANSSCG00005093/PANSSCG00005109/PANSSCG00005187/PANSSCG00005609…	35
GO:0045934	negative regulation of nucleobase-containing compound metabolic process	35/539	35/18682	4.2623e-55	4.32042e-54	1.40134e-54	PANSSCG00000563/PANSSCG00001217/PANSSCG00001502/PANSSCG00001634/PANSSCG00001663/PANSSCG00001884/PANSSCG00001885/PANSSCG00002105/PANSSCG00002108/PANSSCG00002552/PANSSCG00002744/PANSSCG00003181/PANSSCG00003223/PANSSCG00003576/PANSSCG00003622/PANSSCG00003630/PANSSCG00003787/PANSSCG00003895/PANSSCG00004732/PANSSCG00005023/PANSSCG00005028/PANSSCG00005093/PANSSCG00005109/PANSSCG00005187/PANSSCG00005522…	35
GO:0098590	plasma membrane region	35/539	35/18682	4.2623e-55	4.32042e-54	1.40134e-54	PANSSCG00001632/PANSSCG00001654/PANSSCG00001706/PANSSCG00001818/PANSSCG00001947/PANSSCG00001983/PANSSCG00002003/PANSSCG00002540/PANSSCG00002548/PANSSCG00002633/PANSSCG00002833/PANSSCG00003031/PANSSCG00003068/PANSSCG00003181/PANSSCG00003475/PANSSCG00003553/PANSSCG00003633/PANSSCG00003895/PANSSCG00004006/PANSSCG00004044/PANSSCG00004111/PANSSCG00004588/PANSSCG00004736/PANSSCG00004903/PANSSCG00004961…	35
GO:2000113	negative regulation of cellular macromolecule biosynthetic process	35/539	35/18682	4.2623e-55	4.32042e-54	1.40134e-54	PANSSCG00000563/PANSSCG00001023/PANSSCG00001502/PANSSCG00001634/PANSSCG00001663/PANSSCG00001884/PANSSCG00001885/PANSSCG00002105/PANSSCG00002108/PANSSCG00002552/PANSSCG00002744/PANSSCG00003181/PANSSCG00003576/PANSSCG00003622/PANSSCG00003630/PANSSCG00003787/PANSSCG00003895/PANSSCG00004663/PANSSCG00004732/PANSSCG00005023/PANSSCG00005028/PANSSCG00005093/PANSSCG00005109/PANSSCG00005187/PANSSCG00005609…	35
GO:0043005	neuron projection	63/539	162/18682	1.32378e-54	1.33749e-53	4.33818e-54	PANSSCG00001549/PANSSCG00001617/PANSSCG00001632/PANSSCG00001645/PANSSCG00001654/PANSSCG00001800/PANSSCG00001867/PANSSCG00001965/PANSSCG00001983/PANSSCG00001999/PANSSCG00002003/PANSSCG00002092/PANSSCG00002111/PANSSCG00002272/PANSSCG00002540/PANSSCG00002633/PANSSCG00003031/PANSSCG00003088/PANSSCG00003119/PANSSCG00003132/PANSSCG00003324/PANSSCG00003585/PANSSCG00003633/PANSSCG00003655/PANSSCG00003686…	63
GO:0006887	exocytosis	51/539	93/18682	4.86299e-54	4.8975e-53	1.58852e-53	PANSSCG00001179/PANSSCG00001645/PANSSCG00001654/PANSSCG00001678/PANSSCG00001714/PANSSCG00001796/PANSSCG00001800/PANSSCG00001818/PANSSCG00001840/PANSSCG00001867/PANSSCG00001963/PANSSCG00001965/PANSSCG00002044/PANSSCG00002383/PANSSCG00002470/PANSSCG00002536/PANSSCG00002578/PANSSCG00003001/PANSSCG00003119/PANSSCG00003537/PANSSCG00003585/PANSSCG00003638/PANSSCG00003693/PANSSCG00003768/PANSSCG00003807…	51
GO:0016817	hydrolase activity, acting on acid anhydrides	35/539	36/18682	1.49411e-53	1.49987e-52	4.86489e-53	PANSSCG00001549/PANSSCG00001617/PANSSCG00001654/PANSSCG00001658/PANSSCG00001679/PANSSCG00001684/PANSSCG00001694/PANSSCG00001731/PANSSCG00001849/PANSSCG00001894/PANSSCG00001916/PANSSCG00001948/PANSSCG00002116/PANSSCG00002540/PANSSCG00002555/PANSSCG00002661/PANSSCG00002883/PANSSCG00003029/PANSSCG00003031/PANSSCG00003309/PANSSCG00003380/PANSSCG00004111/PANSSCG00004170/PANSSCG00004308/PANSSCG00004645…	35
GO:0002444	myeloid leukocyte mediated immunity	34/539	34/18682	1.57393e-53	1.5501e-52	5.02779e-53	PANSSCG00001179/PANSSCG00001645/PANSSCG00001654/PANSSCG00001678/PANSSCG00001818/PANSSCG00001840/PANSSCG00001867/PANSSCG00001963/PANSSCG00002044/PANSSCG00002470/PANSSCG00002536/PANSSCG00002578/PANSSCG00003001/PANSSCG00003119/PANSSCG00003537/PANSSCG00003585/PANSSCG00003638/PANSSCG00003912/PANSSCG00003957/PANSSCG00004216/PANSSCG00004527/PANSSCG00005064/PANSSCG00005137/PANSSCG00005186/PANSSCG00005255…	34
GO:0044270	cellular nitrogen compound catabolic process	34/539	34/18682	1.57393e-53	1.5501e-52	5.02779e-53	PANSSCG00000950/PANSSCG00000970/PANSSCG00000999/PANSSCG00001217/PANSSCG00001425/PANSSCG00001578/PANSSCG00001625/PANSSCG00001629/PANSSCG00001645/PANSSCG00001649/PANSSCG00001650/PANSSCG00001655/PANSSCG00001974/PANSSCG00002043/PANSSCG00002273/PANSSCG00002354/PANSSCG00002394/PANSSCG00002552/PANSSCG00002561/PANSSCG00002918/PANSSCG00003005/PANSSCG00003068/PANSSCG00003181/PANSSCG00003454/PANSSCG00003662…	34
GO:0046700	heterocycle catabolic process	34/539	34/18682	1.57393e-53	1.5501e-52	5.02779e-53	PANSSCG00000950/PANSSCG00000970/PANSSCG00000999/PANSSCG00001217/PANSSCG00001425/PANSSCG00001578/PANSSCG00001625/PANSSCG00001629/PANSSCG00001645/PANSSCG00001649/PANSSCG00001650/PANSSCG00001655/PANSSCG00001974/PANSSCG00002043/PANSSCG00002214/PANSSCG00002273/PANSSCG00002354/PANSSCG00002394/PANSSCG00002552/PANSSCG00002561/PANSSCG00002918/PANSSCG00003005/PANSSCG00003068/PANSSCG00003181/PANSSCG00003454…	34
GO:0072521	purine-containing compound metabolic process	34/539	34/18682	1.57393e-53	1.5501e-52	5.02779e-53	PANSSCG00001179/PANSSCG00001247/PANSSCG00001645/PANSSCG00001679/PANSSCG00001731/PANSSCG00001974/PANSSCG00001999/PANSSCG00002053/PANSSCG00002242/PANSSCG00002394/PANSSCG00002419/PANSSCG00002561/PANSSCG00002771/PANSSCG00003031/PANSSCG00003068/PANSSCG00003088/PANSSCG00003156/PANSSCG00003223/PANSSCG00003309/PANSSCG00003339/PANSSCG00003380/PANSSCG00003633/PANSSCG00003841/PANSSCG00004006/PANSSCG00004220…	34
GO:0140110	transcription regulator activity	34/539	34/18682	1.57393e-53	1.5501e-52	5.02779e-53	PANSSCG00000563/PANSSCG00001502/PANSSCG00001679/PANSSCG00001800/PANSSCG00001805/PANSSCG00001833/PANSSCG00001884/PANSSCG00001885/PANSSCG00001965/PANSSCG00002105/PANSSCG00002108/PANSSCG00002744/PANSSCG00003298/PANSSCG00003576/PANSSCG00003622/PANSSCG00003724/PANSSCG00003787/PANSSCG00004041/PANSSCG00004143/PANSSCG00004205/PANSSCG00004489/PANSSCG00004596/PANSSCG00004597/PANSSCG00004729/PANSSCG00004732…	34
GO:1901615	organic hydroxy compound metabolic process	34/539	34/18682	1.57393e-53	1.5501e-52	5.02779e-53	PANSSCG00001694/PANSSCG00001885/PANSSCG00001963/PANSSCG00001999/PANSSCG00002407/PANSSCG00002517/PANSSCG00002561/PANSSCG00002833/PANSSCG00003031/PANSSCG00003069/PANSSCG00003088/PANSSCG00003223/PANSSCG00003475/PANSSCG00003497/PANSSCG00003582/PANSSCG00004263/PANSSCG00004517/PANSSCG00004527/PANSSCG00004532/PANSSCG00004861/PANSSCG00004903/PANSSCG00004914/PANSSCG00005016/PANSSCG00005081/PANSSCG00005084…	34
GO:0030234	enzyme regulator activity	42/539	56/18682	1.72985e-53	1.6983e-52	5.5085e-53	PANSSCG00001248/PANSSCG00001550/PANSSCG00001654/PANSSCG00001678/PANSSCG00001741/PANSSCG00001747/PANSSCG00001885/PANSSCG00002062/PANSSCG00002171/PANSSCG00002273/PANSSCG00002354/PANSSCG00002383/PANSSCG00002919/PANSSCG00002971/PANSSCG00003415/PANSSCG00003441/PANSSCG00003582/PANSSCG00003851/PANSSCG00003912/PANSSCG00003980/PANSSCG00004216/PANSSCG00004242/PANSSCG00004455/PANSSCG00004627/PANSSCG00004966…	42
GO:0071345	cellular response to cytokine stimulus	45/539	68/18682	3.56035e-53	3.48446e-52	1.1302e-52	PANSSCG00000142/PANSSCG00000143/PANSSCG00000144/PANSSCG00000145/PANSSCG00000880/PANSSCG00001023/PANSSCG00001654/PANSSCG00001675/PANSSCG00001741/PANSSCG00001810/PANSSCG00001983/PANSSCG00002056/PANSSCG00002092/PANSSCG00002407/PANSSCG00002552/PANSSCG00002697/PANSSCG00003181/PANSSCG00003249/PANSSCG00003298/PANSSCG00003407/PANSSCG00003753/PANSSCG00003841/PANSSCG00003882/PANSSCG00003912/PANSSCG00003986…	45
GO:0009117	nucleotide metabolic process	38/539	44/18682	5.03726e-53	4.89916e-52	1.58906e-52	PANSSCG00001179/PANSSCG00001247/PANSSCG00001645/PANSSCG00001679/PANSSCG00001731/PANSSCG00001867/PANSSCG00001974/PANSSCG00002053/PANSSCG00002242/PANSSCG00002325/PANSSCG00002394/PANSSCG00002407/PANSSCG00002419/PANSSCG00002559/PANSSCG00002561/PANSSCG00002954/PANSSCG00003031/PANSSCG00003068/PANSSCG00003156/PANSSCG00003223/PANSSCG00003309/PANSSCG00003339/PANSSCG00003380/PANSSCG00003633/PANSSCG00003841…	38
GO:1902533	positive regulation of intracellular signal transduction	38/539	44/18682	5.03726e-53	4.89916e-52	1.58906e-52	PANSSCG00000880/PANSSCG00001549/PANSSCG00001654/PANSSCG00001678/PANSSCG00001737/PANSSCG00001741/PANSSCG00001913/PANSSCG00001963/PANSSCG00001965/PANSSCG00002056/PANSSCG00002111/PANSSCG00002470/PANSSCG00002513/PANSSCG00002548/PANSSCG00002552/PANSSCG00003025/PANSSCG00003181/PANSSCG00003223/PANSSCG00003249/PANSSCG00003553/PANSSCG00003753/PANSSCG00003882/PANSSCG00003895/PANSSCG00004264/PANSSCG00004519…	38
GO:0002366	leukocyte activation involved in immune response	36/539	39/18682	9.72096e-53	9.42511e-52	3.05707e-52	PANSSCG00001179/PANSSCG00001645/PANSSCG00001654/PANSSCG00001678/PANSSCG00001818/PANSSCG00001840/PANSSCG00001867/PANSSCG00001963/PANSSCG00002044/PANSSCG00002111/PANSSCG00002470/PANSSCG00002536/PANSSCG00002578/PANSSCG00003001/PANSSCG00003119/PANSSCG00003497/PANSSCG00003537/PANSSCG00003585/PANSSCG00003638/PANSSCG00003912/PANSSCG00003957/PANSSCG00004216/PANSSCG00004527/PANSSCG00004676/PANSSCG00005064…	36
GO:0034774	secretory granule lumen	35/539	37/18682	2.69146e-52	2.59344e-51	8.41191e-52	PANSSCG00001645/PANSSCG00001654/PANSSCG00001800/PANSSCG00001963/PANSSCG00001965/PANSSCG00002044/PANSSCG00002383/PANSSCG00002470/PANSSCG00002536/PANSSCG00002578/PANSSCG00003001/PANSSCG00003119/PANSSCG00003537/PANSSCG00003638/PANSSCG00003807/PANSSCG00003912/PANSSCG00003957/PANSSCG00004216/PANSSCG00004527/PANSSCG00004627/PANSSCG00004891/PANSSCG00005064/PANSSCG00005186/PANSSCG00005255/PANSSCG00005409…	35
GO:0035295	tube development	35/539	37/18682	2.69146e-52	2.59344e-51	8.41191e-52	PANSSCG00001248/PANSSCG00001672/PANSSCG00001675/PANSSCG00001885/PANSSCG00001942/PANSSCG00001963/PANSSCG00001983/PANSSCG00002111/PANSSCG00002132/PANSSCG00002548/PANSSCG00002971/PANSSCG00003119/PANSSCG00003441/PANSSCG00003475/PANSSCG00003807/PANSSCG00003980/PANSSCG00004006/PANSSCG00004039/PANSSCG00004143/PANSSCG00004205/PANSSCG00004489/PANSSCG00004638/PANSSCG00004644/PANSSCG00004676/PANSSCG00004732…	35
GO:0016740	transferase activity	67/539	206/18682	4.9407e-52	4.74612e-51	1.53942e-51	PANSSCG00000613/PANSSCG00001179/PANSSCG00001631/PANSSCG00001656/PANSSCG00001768/PANSSCG00001936/PANSSCG00001974/PANSSCG00001999/PANSSCG00002048/PANSSCG00002105/PANSSCG00002108/PANSSCG00002111/PANSSCG00002354/PANSSCG00002407/PANSSCG00002436/PANSSCG00002561/PANSSCG00002771/PANSSCG00002888/PANSSCG00002926/PANSSCG00002971/PANSSCG00003068/PANSSCG00003088/PANSSCG00003092/PANSSCG00003233/PANSSCG00003277…	67
GO:0002274	myeloid leukocyte activation	34/539	35/18682	5.36383e-52	5.12106e-51	1.66104e-51	PANSSCG00001179/PANSSCG00001645/PANSSCG00001654/PANSSCG00001678/PANSSCG00001818/PANSSCG00001840/PANSSCG00001867/PANSSCG00001963/PANSSCG00002044/PANSSCG00002470/PANSSCG00002536/PANSSCG00002578/PANSSCG00003001/PANSSCG00003119/PANSSCG00003537/PANSSCG00003585/PANSSCG00003638/PANSSCG00003912/PANSSCG00003957/PANSSCG00004216/PANSSCG00004527/PANSSCG00005064/PANSSCG00005137/PANSSCG00005186/PANSSCG00005255…	34
GO:0071396	cellular response to lipid	34/539	35/18682	5.36383e-52	5.12106e-51	1.66104e-51	PANSSCG00001549/PANSSCG00001617/PANSSCG00001674/PANSSCG00001679/PANSSCG00001694/PANSSCG00001810/PANSSCG00001885/PANSSCG00001999/PANSSCG00002111/PANSSCG00002132/PANSSCG00002407/PANSSCG00003088/PANSSCG00003638/PANSSCG00003851/PANSSCG00003912/PANSSCG00004006/PANSSCG00004039/PANSSCG00004143/PANSSCG00004205/PANSSCG00004216/PANSSCG00004220/PANSSCG00004263/PANSSCG00004372/PANSSCG00004489/PANSSCG00004676…	34
GO:0002275	myeloid cell activation involved in immune response	33/539	33/18682	5.80083e-52	5.43849e-51	1.76399e-51	PANSSCG00001179/PANSSCG00001645/PANSSCG00001654/PANSSCG00001678/PANSSCG00001818/PANSSCG00001840/PANSSCG00001867/PANSSCG00001963/PANSSCG00002044/PANSSCG00002470/PANSSCG00002536/PANSSCG00002578/PANSSCG00003001/PANSSCG00003119/PANSSCG00003537/PANSSCG00003585/PANSSCG00003638/PANSSCG00003912/PANSSCG00003957/PANSSCG00004216/PANSSCG00004527/PANSSCG00005064/PANSSCG00005137/PANSSCG00005186/PANSSCG00005255…	33
GO:0035639	purine ribonucleoside triphosphate binding	33/539	33/18682	5.80083e-52	5.43849e-51	1.76399e-51	PANSSCG00001549/PANSSCG00001617/PANSSCG00001637/PANSSCG00001654/PANSSCG00001658/PANSSCG00001679/PANSSCG00001694/PANSSCG00001849/PANSSCG00002003/PANSSCG00002111/PANSSCG00002407/PANSSCG00002436/PANSSCG00002883/PANSSCG00002971/PANSSCG00003031/PANSSCG00003068/PANSSCG00003309/PANSSCG00003841/PANSSCG00003957/PANSSCG00003980/PANSSCG00004111/PANSSCG00004308/PANSSCG00004736/PANSSCG00005081/PANSSCG00005347…	33
GO:0036230	granulocyte activation	33/539	33/18682	5.80083e-52	5.43849e-51	1.76399e-51	PANSSCG00001179/PANSSCG00001645/PANSSCG00001654/PANSSCG00001678/PANSSCG00001818/PANSSCG00001840/PANSSCG00001867/PANSSCG00001963/PANSSCG00002044/PANSSCG00002470/PANSSCG00002536/PANSSCG00002578/PANSSCG00003001/PANSSCG00003119/PANSSCG00003537/PANSSCG00003585/PANSSCG00003638/PANSSCG00003912/PANSSCG00003957/PANSSCG00004216/PANSSCG00004527/PANSSCG00005064/PANSSCG00005137/PANSSCG00005186/PANSSCG00005255…	33
GO:0043299	leukocyte degranulation	33/539	33/18682	5.80083e-52	5.43849e-51	1.76399e-51	PANSSCG00001179/PANSSCG00001645/PANSSCG00001654/PANSSCG00001678/PANSSCG00001818/PANSSCG00001840/PANSSCG00001867/PANSSCG00001963/PANSSCG00002044/PANSSCG00002470/PANSSCG00002536/PANSSCG00002578/PANSSCG00003001/PANSSCG00003119/PANSSCG00003537/PANSSCG00003585/PANSSCG00003638/PANSSCG00003912/PANSSCG00003957/PANSSCG00004216/PANSSCG00004527/PANSSCG00005064/PANSSCG00005137/PANSSCG00005186/PANSSCG00005255…	33
GO:0044282	small molecule catabolic process	33/539	33/18682	5.80083e-52	5.43849e-51	1.76399e-51	PANSSCG00001631/PANSSCG00001645/PANSSCG00001974/PANSSCG00002043/PANSSCG00002272/PANSSCG00002394/PANSSCG00002517/PANSSCG00002561/PANSSCG00002833/PANSSCG00002908/PANSSCG00003068/PANSSCG00003069/PANSSCG00003832/PANSSCG00004031/PANSSCG00004517/PANSSCG00004527/PANSSCG00004891/PANSSCG00005084/PANSSCG00005186/PANSSCG00005305/PANSSCG00005319/PANSSCG00005452/PANSSCG00005480/PANSSCG00005492/PANSSCG00005651…	33
GO:0044703	multi-organism reproductive process	33/539	33/18682	5.80083e-52	5.43849e-51	1.76399e-51	PANSSCG00000880/PANSSCG00001248/PANSSCG00001549/PANSSCG00001641/PANSSCG00001670/PANSSCG00001674/PANSSCG00001675/PANSSCG00001679/PANSSCG00001741/PANSSCG00001916/PANSSCG00001983/PANSSCG00002105/PANSSCG00002273/PANSSCG00002579/PANSSCG00002919/PANSSCG00003525/PANSSCG00003576/PANSSCG00003593/PANSSCG00004294/PANSSCG00004676/PANSSCG00004697/PANSSCG00004766/PANSSCG00004914/PANSSCG00005023/PANSSCG00005028…	33
GO:0009410	response to xenobiotic stimulus	37/539	43/18682	1.61546e-51	1.50551e-50	4.88318e-51	PANSSCG00001007/PANSSCG00001654/PANSSCG00001999/PANSSCG00002105/PANSSCG00002214/PANSSCG00002354/PANSSCG00003088/PANSSCG00003192/PANSSCG00003298/PANSSCG00003376/PANSSCG00003576/PANSSCG00003753/PANSSCG00003882/PANSSCG00003955/PANSSCG00004039/PANSSCG00004220/PANSSCG00004264/PANSSCG00004532/PANSSCG00004563/PANSSCG00004676/PANSSCG00004697/PANSSCG00004841/PANSSCG00004861/PANSSCG00004897/PANSSCG00004903…	37
GO:0034622	cellular protein-containing complex assembly	41/539	57/18682	6.1231e-51	5.68938e-50	1.84537e-50	PANSSCG00001248/PANSSCG00001484/PANSSCG00001485/PANSSCG00001625/PANSSCG00001649/PANSSCG00001654/PANSSCG00001655/PANSSCG00001677/PANSSCG00001730/PANSSCG00001810/PANSSCG00002242/PANSSCG00002394/PANSSCG00002436/PANSSCG00002552/PANSSCG00003005/PANSSCG00003102/PANSSCG00003407/PANSSCG00003415/PANSSCG00003454/PANSSCG00003528/PANSSCG00003537/PANSSCG00003753/PANSSCG00003882/PANSSCG00003895/PANSSCG00004006…	41
GO:0051270	regulation of cellular component movement	33/539	34/18682	1.92034e-50	1.76333e-49	5.71941e-50	PANSSCG00000880/PANSSCG00001550/PANSSCG00001582/PANSSCG00001583/PANSSCG00001674/PANSSCG00001741/PANSSCG00001800/PANSSCG00001947/PANSSCG00001965/PANSSCG00001983/PANSSCG00002111/PANSSCG00003025/PANSSCG00003441/PANSSCG00003553/PANSSCG00003807/PANSSCG00003851/PANSSCG00003895/PANSSCG00004006/PANSSCG00004455/PANSSCG00004638/PANSSCG00004644/PANSSCG00004676/PANSSCG00004700/PANSSCG00004732/PANSSCG00005023…	33
GO:0120036	plasma membrane bounded cell projection organization	33/539	34/18682	1.92034e-50	1.76333e-49	5.71941e-50	PANSSCG00001582/PANSSCG00001583/PANSSCG00001617/PANSSCG00001632/PANSSCG00001654/PANSSCG00001947/PANSSCG00002111/PANSSCG00002540/PANSSCG00002578/PANSSCG00003031/PANSSCG00003537/PANSSCG00003553/PANSSCG00003585/PANSSCG00003686/PANSSCG00003957/PANSSCG00004333/PANSSCG00004519/PANSSCG00004593/PANSSCG00004676/PANSSCG00004736/PANSSCG00004997/PANSSCG00005064/PANSSCG00005093/PANSSCG00005347/PANSSCG00005415…	33
GO:1902680	positive regulation of RNA biosynthetic process	33/539	34/18682	1.92034e-50	1.76333e-49	5.71941e-50	PANSSCG00000563/PANSSCG00001679/PANSSCG00001800/PANSSCG00001885/PANSSCG00001965/PANSSCG00002407/PANSSCG00002548/PANSSCG00002552/PANSSCG00003068/PANSSCG00003298/PANSSCG00003567/PANSSCG00003753/PANSSCG00003882/PANSSCG00004041/PANSSCG00004143/PANSSCG00004205/PANSSCG00004489/PANSSCG00004596/PANSSCG00004644/PANSSCG00004729/PANSSCG00004732/PANSSCG00004897/PANSSCG00005081/PANSSCG00005093/PANSSCG00005582…	33
GO:1903508	positive regulation of nucleic acid-templated transcription	33/539	34/18682	1.92034e-50	1.76333e-49	5.71941e-50	PANSSCG00000563/PANSSCG00001679/PANSSCG00001800/PANSSCG00001885/PANSSCG00001965/PANSSCG00002407/PANSSCG00002548/PANSSCG00002552/PANSSCG00003068/PANSSCG00003298/PANSSCG00003567/PANSSCG00003753/PANSSCG00003882/PANSSCG00004041/PANSSCG00004143/PANSSCG00004205/PANSSCG00004489/PANSSCG00004596/PANSSCG00004644/PANSSCG00004729/PANSSCG00004732/PANSSCG00004897/PANSSCG00005081/PANSSCG00005093/PANSSCG00005582…	33
GO:0022603	regulation of anatomical structure morphogenesis	32/539	32/18682	2.13384e-50	1.93658e-49	6.28136e-50	PANSSCG00000145/PANSSCG00000880/PANSSCG00001550/PANSSCG00001674/PANSSCG00001965/PANSSCG00001983/PANSSCG00002111/PANSSCG00002132/PANSSCG00002470/PANSSCG00003001/PANSSCG00003441/PANSSCG00003851/PANSSCG00004333/PANSSCG00004455/PANSSCG00004598/PANSSCG00004638/PANSSCG00004644/PANSSCG00004676/PANSSCG00004700/PANSSCG00004732/PANSSCG00004961/PANSSCG00004997/PANSSCG00005539/PANSSCG00005621/PANSSCG00005664…	32
GO:0032101	regulation of response to external stimulus	32/539	32/18682	2.13384e-50	1.93658e-49	6.28136e-50	PANSSCG00000740/PANSSCG00001636/PANSSCG00001706/PANSSCG00001741/PANSSCG00001917/PANSSCG00001983/PANSSCG00002296/PANSSCG00002360/PANSSCG00002470/PANSSCG00002907/PANSSCG00003025/PANSSCG00003132/PANSSCG00003753/PANSSCG00003807/PANSSCG00003851/PANSSCG00003882/PANSSCG00003895/PANSSCG00004676/PANSSCG00004903/PANSSCG00005151/PANSSCG00005255/PANSSCG00005601/PANSSCG00005675/PANSSCG00005923/PANSSCG00005939…	32
GO:0044391	ribosomal subunit	32/539	32/18682	2.13384e-50	1.93658e-49	6.28136e-50	PANSSCG00000950/PANSSCG00000999/PANSSCG00001217/PANSSCG00001425/PANSSCG00001578/PANSSCG00001625/PANSSCG00001629/PANSSCG00001649/PANSSCG00001650/PANSSCG00001655/PANSSCG00001659/PANSSCG00001886/PANSSCG00002552/PANSSCG00002617/PANSSCG00002618/PANSSCG00002918/PANSSCG00003005/PANSSCG00003102/PANSSCG00003181/PANSSCG00003407/PANSSCG00003454/PANSSCG00003613/PANSSCG00004690/PANSSCG00005499/PANSSCG00005785…	32
GO:0051253	negative regulation of RNA metabolic process	32/539	32/18682	2.13384e-50	1.93658e-49	6.28136e-50	PANSSCG00000563/PANSSCG00001217/PANSSCG00001502/PANSSCG00001634/PANSSCG00001884/PANSSCG00001885/PANSSCG00002105/PANSSCG00002108/PANSSCG00002552/PANSSCG00002744/PANSSCG00003576/PANSSCG00003622/PANSSCG00003630/PANSSCG00003787/PANSSCG00003895/PANSSCG00004732/PANSSCG00005023/PANSSCG00005028/PANSSCG00005093/PANSSCG00005109/PANSSCG00005187/PANSSCG00005522/PANSSCG00005609/PANSSCG00005720/PANSSCG00005923…	32
GO:0009636	response to toxic substance	43/539	66/18682	2.18542e-50	1.97764e-49	6.41456e-50	PANSSCG00001197/PANSSCG00001663/PANSSCG00001945/PANSSCG00001963/PANSSCG00001971/PANSSCG00001999/PANSSCG00002044/PANSSCG00002105/PANSSCG00002111/PANSSCG00002517/PANSSCG00002552/PANSSCG00002578/PANSSCG00003069/PANSSCG00003088/PANSSCG00003181/PANSSCG00003376/PANSSCG00003407/PANSSCG00003553/PANSSCG00003576/PANSSCG00003681/PANSSCG00003955/PANSSCG00004039/PANSSCG00004263/PANSSCG00004264/PANSSCG00004563…	43
GO:0007166	cell surface receptor signaling pathway	62/539	178/18682	2.92162e-50	2.63621e-49	8.55065e-50	PANSSCG00000142/PANSSCG00000143/PANSSCG00000144/PANSSCG00000145/PANSSCG00000880/PANSSCG00001654/PANSSCG00001663/PANSSCG00001674/PANSSCG00001684/PANSSCG00001694/PANSSCG00001706/PANSSCG00001885/PANSSCG00002048/PANSSCG00002056/PANSSCG00002092/PANSSCG00002111/PANSSCG00002132/PANSSCG00002238/PANSSCG00002552/PANSSCG00002697/PANSSCG00003029/PANSSCG00003249/PANSSCG00003298/PANSSCG00003497/PANSSCG00003553…	62
GO:0016462	pyrophosphatase activity	35/539	39/18682	3.15155e-50	2.83548e-49	9.19699e-50	PANSSCG00001549/PANSSCG00001617/PANSSCG00001654/PANSSCG00001658/PANSSCG00001679/PANSSCG00001684/PANSSCG00001694/PANSSCG00001731/PANSSCG00001849/PANSSCG00001894/PANSSCG00001916/PANSSCG00001948/PANSSCG00002116/PANSSCG00002540/PANSSCG00002555/PANSSCG00002661/PANSSCG00002883/PANSSCG00003029/PANSSCG00003031/PANSSCG00003309/PANSSCG00003380/PANSSCG00004111/PANSSCG00004170/PANSSCG00004308/PANSSCG00004645…	35
GO:0044265	cellular macromolecule catabolic process	34/539	37/18682	1.12894e-49	1.0128e-48	3.28506e-49	PANSSCG00000950/PANSSCG00000970/PANSSCG00000999/PANSSCG00001217/PANSSCG00001248/PANSSCG00001425/PANSSCG00001578/PANSSCG00001625/PANSSCG00001629/PANSSCG00001649/PANSSCG00001650/PANSSCG00001655/PANSSCG00002552/PANSSCG00002918/PANSSCG00002926/PANSSCG00003005/PANSSCG00003025/PANSSCG00003119/PANSSCG00003181/PANSSCG00003454/PANSSCG00003662/PANSSCG00003972/PANSSCG00004041/PANSSCG00004598/PANSSCG00004700…	34
GO:0050801	ion homeostasis	36/539	43/18682	3.08162e-49	2.75669e-48	8.9414e-49	PANSSCG00001179/PANSSCG00001549/PANSSCG00001617/PANSSCG00001694/PANSSCG00001706/PANSSCG00001840/PANSSCG00001916/PANSSCG00002111/PANSSCG00002548/PANSSCG00002559/PANSSCG00002833/PANSSCG00002883/PANSSCG00002954/PANSSCG00003031/PANSSCG00003324/PANSSCG00003497/PANSSCG00003525/PANSSCG00003808/PANSSCG00003895/PANSSCG00004052/PANSSCG00004220/PANSSCG00004264/PANSSCG00004324/PANSSCG00004676/PANSSCG00004697…	36
GO:0043312	neutrophil degranulation	33/539	35/18682	3.2721e-49	2.91871e-48	9.46693e-49	PANSSCG00001179/PANSSCG00001645/PANSSCG00001654/PANSSCG00001678/PANSSCG00001818/PANSSCG00001840/PANSSCG00001867/PANSSCG00001963/PANSSCG00002044/PANSSCG00002470/PANSSCG00002536/PANSSCG00002578/PANSSCG00003001/PANSSCG00003119/PANSSCG00003537/PANSSCG00003585/PANSSCG00003638/PANSSCG00003912/PANSSCG00003957/PANSSCG00004216/PANSSCG00004527/PANSSCG00005064/PANSSCG00005137/PANSSCG00005186/PANSSCG00005255…	33
GO:0001932	regulation of protein phosphorylation	48/539	93/18682	3.60868e-49	3.20977e-48	1.0411e-48	PANSSCG00000880/PANSSCG00001549/PANSSCG00001654/PANSSCG00001675/PANSSCG00001678/PANSSCG00001737/PANSSCG00001741/PANSSCG00001887/PANSSCG00001913/PANSSCG00002056/PANSSCG00002111/PANSSCG00002273/PANSSCG00002470/PANSSCG00002548/PANSSCG00002552/PANSSCG00002559/PANSSCG00002954/PANSSCG00002971/PANSSCG00003001/PANSSCG00003181/PANSSCG00003249/PANSSCG00003567/PANSSCG00003681/PANSSCG00003753/PANSSCG00003807…	48
GO:0000323	lytic vacuole	31/539	31/18682	7.83428e-49	6.90922e-48	2.24103e-48	PANSSCG00001654/PANSSCG00001678/PANSSCG00001840/PANSSCG00001849/PANSSCG00001878/PANSSCG00001963/PANSSCG00001977/PANSSCG00002044/PANSSCG00002296/PANSSCG00002394/PANSSCG00002470/PANSSCG00002513/PANSSCG00002578/PANSSCG00003119/PANSSCG00003638/PANSSCG00003753/PANSSCG00003882/PANSSCG00003912/PANSSCG00003957/PANSSCG00004216/PANSSCG00004598/PANSSCG00004736/PANSSCG00004997/PANSSCG00005064/PANSSCG00005137…	31
GO:0051093	negative regulation of developmental process	31/539	31/18682	7.83428e-49	6.90922e-48	2.24103e-48	PANSSCG00000145/PANSSCG00001549/PANSSCG00001674/PANSSCG00001675/PANSSCG00001694/PANSSCG00001965/PANSSCG00002092/PANSSCG00002111/PANSSCG00002971/PANSSCG00003119/PANSSCG00003441/PANSSCG00003851/PANSSCG00003895/PANSSCG00003980/PANSSCG00004079/PANSSCG00004455/PANSSCG00004538/PANSSCG00004638/PANSSCG00004676/PANSSCG00004732/PANSSCG00005023/PANSSCG00005093/PANSSCG00005255/PANSSCG00005866/PANSSCG00005923…	31
GO:0051338	regulation of transferase activity	31/539	31/18682	7.83428e-49	6.90922e-48	2.24103e-48	PANSSCG00000880/PANSSCG00001654/PANSSCG00001741/PANSSCG00001887/PANSSCG00002056/PANSSCG00002111/PANSSCG00002354/PANSSCG00002548/PANSSCG00002552/PANSSCG00002561/PANSSCG00002971/PANSSCG00003181/PANSSCG00003407/PANSSCG00003753/PANSSCG00003882/PANSSCG00003980/PANSSCG00004676/PANSSCG00004966/PANSSCG00005023/PANSSCG00005255/PANSSCG00005393/PANSSCG00005667/PANSSCG00005675/PANSSCG00005868/PANSSCG00005948…	31
GO:0022008	neurogenesis	46/539	84/18682	9.14713e-49	8.04432e-48	2.6092e-48	PANSSCG00000563/PANSSCG00001632/PANSSCG00001654/PANSSCG00001674/PANSSCG00001887/PANSSCG00001942/PANSSCG00001983/PANSSCG00002092/PANSSCG00002105/PANSSCG00002111/PANSSCG00002132/PANSSCG00002540/PANSSCG00002571/PANSSCG00003031/PANSSCG00003076/PANSSCG00003119/PANSSCG00003553/PANSSCG00003576/PANSSCG00003585/PANSSCG00003633/PANSSCG00003686/PANSSCG00003895/PANSSCG00004333/PANSSCG00004372/PANSSCG00004455…	46
GO:0002446	neutrophil mediated immunity	34/539	38/18682	1.04428e-48	9.15796e-48	2.97042e-48	PANSSCG00001179/PANSSCG00001645/PANSSCG00001654/PANSSCG00001678/PANSSCG00001818/PANSSCG00001840/PANSSCG00001867/PANSSCG00001963/PANSSCG00002044/PANSSCG00002470/PANSSCG00002536/PANSSCG00002578/PANSSCG00003001/PANSSCG00003119/PANSSCG00003537/PANSSCG00003585/PANSSCG00003638/PANSSCG00003912/PANSSCG00003957/PANSSCG00004216/PANSSCG00004527/PANSSCG00005064/PANSSCG00005137/PANSSCG00005186/PANSSCG00005255…	34
GO:0033365	protein localization to organelle	39/539	54/18682	1.30757e-48	1.14348e-47	3.70892e-48	PANSSCG00000950/PANSSCG00000970/PANSSCG00000999/PANSSCG00001217/PANSSCG00001425/PANSSCG00001578/PANSSCG00001619/PANSSCG00001625/PANSSCG00001629/PANSSCG00001649/PANSSCG00001650/PANSSCG00001655/PANSSCG00001657/PANSSCG00001679/PANSSCG00001936/PANSSCG00001963/PANSSCG00002171/PANSSCG00002552/PANSSCG00002918/PANSSCG00003005/PANSSCG00003181/PANSSCG00003223/PANSSCG00003298/PANSSCG00003454/PANSSCG00003947…	39
GO:0006955	immune response	73/539	285/18682	1.89201e-48	1.64996e-47	5.35169e-48	PANSSCG00000143/PANSSCG00000144/PANSSCG00000880/PANSSCG00001023/PANSSCG00001179/PANSSCG00001629/PANSSCG00001645/PANSSCG00001650/PANSSCG00001654/PANSSCG00001675/PANSSCG00001678/PANSSCG00001741/PANSSCG00001818/PANSSCG00001840/PANSSCG00001867/PANSSCG00001917/PANSSCG00001963/PANSSCG00002044/PANSSCG00002048/PANSSCG00002056/PANSSCG00002092/PANSSCG00002111/PANSSCG00002470/PANSSCG00002536/PANSSCG00002540…	73
GO:0072594	establishment of protein localization to organelle	33/539	36/18682	3.8231e-48	3.32472e-47	1.07838e-47	PANSSCG00000950/PANSSCG00000970/PANSSCG00000999/PANSSCG00001217/PANSSCG00001425/PANSSCG00001578/PANSSCG00001619/PANSSCG00001625/PANSSCG00001629/PANSSCG00001649/PANSSCG00001650/PANSSCG00001655/PANSSCG00001657/PANSSCG00001679/PANSSCG00001963/PANSSCG00002552/PANSSCG00002918/PANSSCG00003005/PANSSCG00003181/PANSSCG00003223/PANSSCG00003298/PANSSCG00003454/PANSSCG00003947/PANSSCG00004527/PANSSCG00004685…	33
GO:0055082	cellular chemical homeostasis	31/539	32/18682	2.44082e-47	2.11087e-46	6.84668e-47	PANSSCG00001617/PANSSCG00001706/PANSSCG00001840/PANSSCG00001916/PANSSCG00002111/PANSSCG00002548/PANSSCG00002883/PANSSCG00003031/PANSSCG00003068/PANSSCG00003324/PANSSCG00003497/PANSSCG00003525/PANSSCG00003808/PANSSCG00003895/PANSSCG00003907/PANSSCG00004052/PANSSCG00004220/PANSSCG00004264/PANSSCG00004324/PANSSCG00004676/PANSSCG00004697/PANSSCG00005023/PANSSCG00005311/PANSSCG00005347/PANSSCG00005654…	31
GO:0097447	dendritic tree	31/539	32/18682	2.44082e-47	2.11087e-46	6.84668e-47	PANSSCG00001549/PANSSCG00001617/PANSSCG00001632/PANSSCG00001654/PANSSCG00001800/PANSSCG00001983/PANSSCG00001999/PANSSCG00002111/PANSSCG00002272/PANSSCG00002540/PANSSCG00002633/PANSSCG00003031/PANSSCG00003088/PANSSCG00003132/PANSSCG00003324/PANSSCG00003585/PANSSCG00003633/PANSSCG00003655/PANSSCG00004372/PANSSCG00004597/PANSSCG00004676/PANSSCG00005030/PANSSCG00005277/PANSSCG00005347/PANSSCG00005370…	31
GO:0048037	obsolete cofactor binding	30/539	30/18682	2.87083e-47	2.46229e-46	7.98651e-47	PANSSCG00001007/PANSSCG00001197/PANSSCG00001747/PANSSCG00001963/PANSSCG00002108/PANSSCG00002214/PANSSCG00002273/PANSSCG00002470/PANSSCG00002517/PANSSCG00002771/PANSSCG00003069/PANSSCG00003181/PANSSCG00003376/PANSSCG00003681/PANSSCG00003955/PANSSCG00004263/PANSSCG00004517/PANSSCG00004563/PANSSCG00004914/PANSSCG00004995/PANSSCG00005084/PANSSCG00005305/PANSSCG00005331/PANSSCG00005629/PANSSCG00006097…	30
GO:0090087	regulation of peptide transport	30/539	30/18682	2.87083e-47	2.46229e-46	7.98651e-47	PANSSCG00000143/PANSSCG00001549/PANSSCG00001654/PANSSCG00001706/PANSSCG00001741/PANSSCG00001885/PANSSCG00002092/PANSSCG00002111/PANSSCG00002325/PANSSCG00002561/PANSSCG00003001/PANSSCG00003025/PANSSCG00003068/PANSSCG00003638/PANSSCG00003753/PANSSCG00003882/PANSSCG00003895/PANSSCG00004220/PANSSCG00004519/PANSSCG00005077/PANSSCG00005093/PANSSCG00005108/PANSSCG00005492/PANSSCG00005539/PANSSCG00005667…	30
GO:0098771	inorganic ion homeostasis	30/539	30/18682	2.87083e-47	2.46229e-46	7.98651e-47	PANSSCG00001549/PANSSCG00001617/PANSSCG00001706/PANSSCG00001840/PANSSCG00001916/PANSSCG00002111/PANSSCG00002548/PANSSCG00002833/PANSSCG00002883/PANSSCG00003031/PANSSCG00003324/PANSSCG00003497/PANSSCG00003525/PANSSCG00003808/PANSSCG00003895/PANSSCG00004052/PANSSCG00004220/PANSSCG00004264/PANSSCG00004324/PANSSCG00004676/PANSSCG00004697/PANSSCG00005023/PANSSCG00005311/PANSSCG00005347/PANSSCG00005654…	30
GO:0015031	protein transport	57/539	158/18682	3.06507e-47	2.62169e-46	8.50353e-47	PANSSCG00000880/PANSSCG00000950/PANSSCG00000970/PANSSCG00000999/PANSSCG00001179/PANSSCG00001217/PANSSCG00001425/PANSSCG00001549/PANSSCG00001578/PANSSCG00001619/PANSSCG00001625/PANSSCG00001629/PANSSCG00001642/PANSSCG00001649/PANSSCG00001650/PANSSCG00001654/PANSSCG00001655/PANSSCG00001657/PANSSCG00001658/PANSSCG00001679/PANSSCG00001694/PANSSCG00001887/PANSSCG00001906/PANSSCG00001926/PANSSCG00001963…	57
GO:0016071	mRNA metabolic process	32/539	35/18682	1.28903e-46	1.09655e-45	3.55671e-46	PANSSCG00000950/PANSSCG00000970/PANSSCG00000999/PANSSCG00001217/PANSSCG00001425/PANSSCG00001578/PANSSCG00001625/PANSSCG00001629/PANSSCG00001649/PANSSCG00001650/PANSSCG00001655/PANSSCG00001663/PANSSCG00001730/PANSSCG00001810/PANSSCG00001885/PANSSCG00001906/PANSSCG00001926/PANSSCG00002436/PANSSCG00002536/PANSSCG00002552/PANSSCG00002661/PANSSCG00002744/PANSSCG00002918/PANSSCG00003005/PANSSCG00003181…	32
GO:0048545	response to steroid hormone	32/539	35/18682	1.28903e-46	1.09655e-45	3.55671e-46	PANSSCG00000880/PANSSCG00001617/PANSSCG00001631/PANSSCG00001637/PANSSCG00001679/PANSSCG00001849/PANSSCG00001885/PANSSCG00001999/PANSSCG00002394/PANSSCG00002470/PANSSCG00002517/PANSSCG00003069/PANSSCG00003088/PANSSCG00003638/PANSSCG00003753/PANSSCG00003882/PANSSCG00003912/PANSSCG00004039/PANSSCG00004216/PANSSCG00004263/PANSSCG00004527/PANSSCG00004532/PANSSCG00004697/PANSSCG00004861/PANSSCG00005347…	32
GO:0032870	cellular response to hormone stimulus	35/539	44/18682	2.37767e-46	2.01714e-45	6.54266e-46	PANSSCG00001023/PANSSCG00001549/PANSSCG00001617/PANSSCG00001674/PANSSCG00001679/PANSSCG00001714/PANSSCG00001796/PANSSCG00001885/PANSSCG00001999/PANSSCG00002394/PANSSCG00002407/PANSSCG00003088/PANSSCG00003309/PANSSCG00003324/PANSSCG00003638/PANSSCG00003912/PANSSCG00003925/PANSSCG00004039/PANSSCG00004216/PANSSCG00004263/PANSSCG00004663/PANSSCG00004732/PANSSCG00004861/PANSSCG00005081/PANSSCG00005137…	35
GO:0002283	neutrophil activation involved in immune response	33/539	38/18682	2.54794e-46	2.15573e-45	6.99219e-46	PANSSCG00001179/PANSSCG00001645/PANSSCG00001654/PANSSCG00001678/PANSSCG00001818/PANSSCG00001840/PANSSCG00001867/PANSSCG00001963/PANSSCG00002044/PANSSCG00002470/PANSSCG00002536/PANSSCG00002578/PANSSCG00003001/PANSSCG00003119/PANSSCG00003537/PANSSCG00003585/PANSSCG00003638/PANSSCG00003912/PANSSCG00003957/PANSSCG00004216/PANSSCG00004527/PANSSCG00005064/PANSSCG00005137/PANSSCG00005186/PANSSCG00005255…	33
GO:0050877	nervous system process	37/539	51/18682	2.76944e-46	2.33681e-45	7.57952e-46	PANSSCG00000880/PANSSCG00001549/PANSSCG00001706/PANSSCG00001867/PANSSCG00001887/PANSSCG00001983/PANSSCG00001999/PANSSCG00002111/PANSSCG00002837/PANSSCG00003031/PANSSCG00003088/PANSSCG00003585/PANSSCG00003633/PANSSCG00003726/PANSSCG00003851/PANSSCG00004006/PANSSCG00004044/PANSSCG00004052/PANSSCG00004081/PANSSCG00004111/PANSSCG00004194/PANSSCG00004220/PANSSCG00004242/PANSSCG00004597/PANSSCG00004697…	37
GO:0044297	cell body	44/539	82/18682	3.8463e-46	3.2367e-45	1.04983e-45	PANSSCG00001549/PANSSCG00001617/PANSSCG00001625/PANSSCG00001637/PANSSCG00001654/PANSSCG00001655/PANSSCG00001983/PANSSCG00001999/PANSSCG00002111/PANSSCG00002272/PANSSCG00002540/PANSSCG00003031/PANSSCG00003088/PANSSCG00003132/PANSSCG00003324/PANSSCG00003633/PANSSCG00003655/PANSSCG00003899/PANSSCG00003957/PANSSCG00004039/PANSSCG00004052/PANSSCG00004264/PANSSCG00004333/PANSSCG00004372/PANSSCG00004597…	44
GO:0009968	negative regulation of signal transduction	36/539	48/18682	5.8326e-46	4.89499e-45	1.58771e-45	PANSSCG00000143/PANSSCG00000880/PANSSCG00001550/PANSSCG00001884/PANSSCG00002056/PANSSCG00002062/PANSSCG00002111/PANSSCG00002273/PANSSCG00002548/PANSSCG00002552/PANSSCG00002559/PANSSCG00002744/PANSSCG00002954/PANSSCG00002971/PANSSCG00003553/PANSSCG00003980/PANSSCG00004264/PANSSCG00004333/PANSSCG00004504/PANSSCG00004597/PANSSCG00004638/PANSSCG00005077/PANSSCG00005093/PANSSCG00005255/PANSSCG00005609…	36
GO:0030029	actin filament-based process	30/539	31/18682	8.66453e-46	7.2328e-45	2.34598e-45	PANSSCG00001637/PANSSCG00001679/PANSSCG00001684/PANSSCG00001731/PANSSCG00001800/PANSSCG00001936/PANSSCG00001965/PANSSCG00001983/PANSSCG00002111/PANSSCG00002132/PANSSCG00002559/PANSSCG00002893/PANSSCG00002954/PANSSCG00003029/PANSSCG00003309/PANSSCG00003537/PANSSCG00003768/PANSSCG00003851/PANSSCG00003895/PANSSCG00003925/PANSSCG00003986/PANSSCG00004645/PANSSCG00004676/PANSSCG00004736/PANSSCG00005629…	30
GO:0051046	regulation of secretion	30/539	31/18682	8.66453e-46	7.2328e-45	2.34598e-45	PANSSCG00000143/PANSSCG00000880/PANSSCG00001549/PANSSCG00001741/PANSSCG00001800/PANSSCG00001818/PANSSCG00001885/PANSSCG00002092/PANSSCG00002111/PANSSCG00002325/PANSSCG00002561/PANSSCG00002833/PANSSCG00003001/PANSSCG00003068/PANSSCG00003553/PANSSCG00003638/PANSSCG00003753/PANSSCG00003851/PANSSCG00003882/PANSSCG00003895/PANSSCG00004220/PANSSCG00004519/PANSSCG00004697/PANSSCG00004720/PANSSCG00005077…	30
GO:0016818	hydrolase activity, acting on acid anhydrides, in phosphorus-containing anhydrides	35/539	45/18682	1.04183e-45	8.47047e-45	2.74743e-45	PANSSCG00001549/PANSSCG00001617/PANSSCG00001654/PANSSCG00001658/PANSSCG00001679/PANSSCG00001684/PANSSCG00001694/PANSSCG00001731/PANSSCG00001849/PANSSCG00001894/PANSSCG00001916/PANSSCG00001948/PANSSCG00002116/PANSSCG00002540/PANSSCG00002555/PANSSCG00002661/PANSSCG00002883/PANSSCG00003029/PANSSCG00003031/PANSSCG00003309/PANSSCG00003380/PANSSCG00004111/PANSSCG00004170/PANSSCG00004308/PANSSCG00004645…	35
GO:0006732	obsolete coenzyme metabolic process	29/539	29/18682	1.04999e-45	8.47047e-45	2.74743e-45	PANSSCG00001179/PANSSCG00001645/PANSSCG00001867/PANSSCG00001974/PANSSCG00001999/PANSSCG00002325/PANSSCG00002394/PANSSCG00002419/PANSSCG00002559/PANSSCG00002561/PANSSCG00002771/PANSSCG00002954/PANSSCG00003068/PANSSCG00003088/PANSSCG00003947/PANSSCG00004264/PANSSCG00004496/PANSSCG00005016/PANSSCG00005023/PANSSCG00005084/PANSSCG00005277/PANSSCG00005331/PANSSCG00005480/PANSSCG00005654/PANSSCG00005775…	29
GO:0009150	purine ribonucleotide metabolic process	29/539	29/18682	1.04999e-45	8.47047e-45	2.74743e-45	PANSSCG00001179/PANSSCG00001247/PANSSCG00001645/PANSSCG00001679/PANSSCG00001731/PANSSCG00001974/PANSSCG00002053/PANSSCG00002242/PANSSCG00002394/PANSSCG00002419/PANSSCG00002561/PANSSCG00003031/PANSSCG00003068/PANSSCG00003156/PANSSCG00003223/PANSSCG00003309/PANSSCG00003339/PANSSCG00003380/PANSSCG00003633/PANSSCG00004006/PANSSCG00004220/PANSSCG00005213/PANSSCG00005414/PANSSCG00005480/PANSSCG00005651…	29
GO:0015318	inorganic molecular entity transmembrane transporter activity	29/539	29/18682	1.04999e-45	8.47047e-45	2.74743e-45	PANSSCG00000871/PANSSCG00000915/PANSSCG00001617/PANSSCG00001706/PANSSCG00001707/PANSSCG00001916/PANSSCG00002034/PANSSCG00002282/PANSSCG00002548/PANSSCG00002883/PANSSCG00003031/PANSSCG00003278/PANSSCG00003644/PANSSCG00003655/PANSSCG00003895/PANSSCG00003899/PANSSCG00003907/PANSSCG00004588/PANSSCG00004841/PANSSCG00004903/PANSSCG00005030/PANSSCG00005215/PANSSCG00005311/PANSSCG00005347/PANSSCG00005534…	29
GO:0019693	ribose phosphate metabolic process	29/539	29/18682	1.04999e-45	8.47047e-45	2.74743e-45	PANSSCG00001179/PANSSCG00001247/PANSSCG00001645/PANSSCG00001679/PANSSCG00001731/PANSSCG00001974/PANSSCG00002053/PANSSCG00002242/PANSSCG00002394/PANSSCG00002419/PANSSCG00002561/PANSSCG00003031/PANSSCG00003068/PANSSCG00003156/PANSSCG00003223/PANSSCG00003309/PANSSCG00003339/PANSSCG00003380/PANSSCG00003633/PANSSCG00004006/PANSSCG00004220/PANSSCG00005213/PANSSCG00005414/PANSSCG00005480/PANSSCG00005651…	29
GO:0034655	nucleobase-containing compound catabolic process	29/539	29/18682	1.04999e-45	8.47047e-45	2.74743e-45	PANSSCG00000950/PANSSCG00000970/PANSSCG00000999/PANSSCG00001217/PANSSCG00001425/PANSSCG00001578/PANSSCG00001625/PANSSCG00001629/PANSSCG00001645/PANSSCG00001649/PANSSCG00001650/PANSSCG00001655/PANSSCG00001974/PANSSCG00002394/PANSSCG00002552/PANSSCG00002561/PANSSCG00002918/PANSSCG00003005/PANSSCG00003068/PANSSCG00003181/PANSSCG00003454/PANSSCG00003662/PANSSCG00004006/PANSSCG00005213/PANSSCG00005651…	29
GO:0044437	obsolete vacuolar part	29/539	29/18682	1.04999e-45	8.47047e-45	2.74743e-45	PANSSCG00001654/PANSSCG00001678/PANSSCG00001849/PANSSCG00001977/PANSSCG00002044/PANSSCG00002386/PANSSCG00002470/PANSSCG00002513/PANSSCG00002578/PANSSCG00003074/PANSSCG00003229/PANSSCG00003638/PANSSCG00003753/PANSSCG00003882/PANSSCG00003912/PANSSCG00003957/PANSSCG00004216/PANSSCG00004598/PANSSCG00004736/PANSSCG00004891/PANSSCG00005064/PANSSCG00005137/PANSSCG00005186/PANSSCG00005810/PANSSCG00005871…	29
GO:0055080	cation homeostasis	29/539	29/18682	1.04999e-45	8.47047e-45	2.74743e-45	PANSSCG00001549/PANSSCG00001617/PANSSCG00001706/PANSSCG00001840/PANSSCG00001916/PANSSCG00002111/PANSSCG00002548/PANSSCG00002833/PANSSCG00002883/PANSSCG00003031/PANSSCG00003324/PANSSCG00003497/PANSSCG00003525/PANSSCG00003808/PANSSCG00003895/PANSSCG00004052/PANSSCG00004220/PANSSCG00004264/PANSSCG00004324/PANSSCG00004676/PANSSCG00004697/PANSSCG00005023/PANSSCG00005347/PANSSCG00005654/PANSSCG00005667…	29
GO:0060089	molecular transducer activity	29/539	29/18682	1.04999e-45	8.47047e-45	2.74743e-45	PANSSCG00001694/PANSSCG00001714/PANSSCG00001750/PANSSCG00001796/PANSSCG00001971/PANSSCG00002048/PANSSCG00002056/PANSSCG00002092/PANSSCG00002132/PANSSCG00002837/PANSSCG00003726/PANSSCG00003753/PANSSCG00003882/PANSSCG00003883/PANSSCG00003895/PANSSCG00004081/PANSSCG00004127/PANSSCG00004194/PANSSCG00004382/PANSSCG00004449/PANSSCG00004638/PANSSCG00004644/PANSSCG00004765/PANSSCG00005948/PANSSCG00005954…	29
GO:0060284	regulation of cell development	29/539	29/18682	1.04999e-45	8.47047e-45	2.74743e-45	PANSSCG00001674/PANSSCG00001965/PANSSCG00001983/PANSSCG00002092/PANSSCG00002111/PANSSCG00002132/PANSSCG00002540/PANSSCG00002571/PANSSCG00003119/PANSSCG00003895/PANSSCG00004333/PANSSCG00004372/PANSSCG00004455/PANSSCG00004644/PANSSCG00004676/PANSSCG00004700/PANSSCG00004997/PANSSCG00005093/PANSSCG00005108/PANSSCG00005621/PANSSCG00005664/PANSSCG00005872/PANSSCG00005923/PANSSCG00005948/PANSSCG00006137…	29
GO:0098657	import into cell	29/539	29/18682	1.04999e-45	8.47047e-45	2.74743e-45	PANSSCG00001654/PANSSCG00001684/PANSSCG00001694/PANSSCG00002111/PANSSCG00002116/PANSSCG00002273/PANSSCG00002470/PANSSCG00003029/PANSSCG00003132/PANSSCG00003497/PANSSCG00003537/PANSSCG00003553/PANSSCG00003947/PANSSCG00004324/PANSSCG00004333/PANSSCG00004598/PANSSCG00004736/PANSSCG00004903/PANSSCG00004961/PANSSCG00005255/PANSSCG00005492/PANSSCG00005621/PANSSCG00005664/PANSSCG00005858/PANSSCG00005923…	29
GO:0099080	supramolecular complex	29/539	29/18682	1.04999e-45	8.47047e-45	2.74743e-45	PANSSCG00001628/PANSSCG00001637/PANSSCG00001684/PANSSCG00001731/PANSSCG00001800/PANSSCG00001894/PANSSCG00001936/PANSSCG00001942/PANSSCG00001948/PANSSCG00001965/PANSSCG00002171/PANSSCG00002214/PANSSCG00002883/PANSSCG00002964/PANSSCG00003029/PANSSCG00003309/PANSSCG00003957/PANSSCG00003986/PANSSCG00004006/PANSSCG00004841/PANSSCG00005030/PANSSCG00005563/PANSSCG00005943/PANSSCG00006087/PANSSCG00006279…	29
GO:0099081	supramolecular polymer	29/539	29/18682	1.04999e-45	8.47047e-45	2.74743e-45	PANSSCG00001628/PANSSCG00001637/PANSSCG00001684/PANSSCG00001731/PANSSCG00001800/PANSSCG00001894/PANSSCG00001936/PANSSCG00001942/PANSSCG00001948/PANSSCG00001965/PANSSCG00002171/PANSSCG00002214/PANSSCG00002883/PANSSCG00002964/PANSSCG00003029/PANSSCG00003309/PANSSCG00003957/PANSSCG00003986/PANSSCG00004006/PANSSCG00004841/PANSSCG00005030/PANSSCG00005563/PANSSCG00005943/PANSSCG00006087/PANSSCG00006279…	29
GO:0019725	cellular homeostasis	32/539	36/18682	1.12954e-45	9.08874e-45	2.94797e-45	PANSSCG00001617/PANSSCG00001706/PANSSCG00001840/PANSSCG00001916/PANSSCG00002111/PANSSCG00002548/PANSSCG00002883/PANSSCG00003031/PANSSCG00003068/PANSSCG00003324/PANSSCG00003497/PANSSCG00003525/PANSSCG00003808/PANSSCG00003895/PANSSCG00003907/PANSSCG00004052/PANSSCG00004220/PANSSCG00004264/PANSSCG00004324/PANSSCG00004676/PANSSCG00004697/PANSSCG00005023/PANSSCG00005311/PANSSCG00005347/PANSSCG00005393…	32
GO:0017111	nucleoside-triphosphatase activity	34/539	42/18682	1.50088e-45	1.20456e-44	3.90703e-45	PANSSCG00001549/PANSSCG00001617/PANSSCG00001654/PANSSCG00001658/PANSSCG00001679/PANSSCG00001684/PANSSCG00001694/PANSSCG00001731/PANSSCG00001849/PANSSCG00001894/PANSSCG00001916/PANSSCG00001948/PANSSCG00002116/PANSSCG00002540/PANSSCG00002555/PANSSCG00002661/PANSSCG00002883/PANSSCG00003029/PANSSCG00003031/PANSSCG00003309/PANSSCG00003380/PANSSCG00004111/PANSSCG00004170/PANSSCG00004308/PANSSCG00004645…	34
GO:0015075	ion transmembrane transporter activity	33/539	39/18682	1.61254e-45	1.28756e-44	4.17623e-45	PANSSCG00000871/PANSSCG00000915/PANSSCG00001617/PANSSCG00001694/PANSSCG00001706/PANSSCG00001707/PANSSCG00001916/PANSSCG00002034/PANSSCG00002282/PANSSCG00002548/PANSSCG00002883/PANSSCG00003031/PANSSCG00003278/PANSSCG00003644/PANSSCG00003655/PANSSCG00003895/PANSSCG00003899/PANSSCG00003907/PANSSCG00004588/PANSSCG00004841/PANSSCG00004903/PANSSCG00005030/PANSSCG00005108/PANSSCG00005166/PANSSCG00005215…	33
GO:0040012	regulation of locomotion	33/539	39/18682	1.61254e-45	1.28756e-44	4.17623e-45	PANSSCG00000880/PANSSCG00001550/PANSSCG00001582/PANSSCG00001583/PANSSCG00001674/PANSSCG00001741/PANSSCG00001947/PANSSCG00001965/PANSSCG00001983/PANSSCG00002111/PANSSCG00003025/PANSSCG00003441/PANSSCG00003553/PANSSCG00003807/PANSSCG00003851/PANSSCG00003895/PANSSCG00004006/PANSSCG00004455/PANSSCG00004638/PANSSCG00004644/PANSSCG00004676/PANSSCG00004700/PANSSCG00004732/PANSSCG00005023/PANSSCG00005496…	33
GO:0032880	regulation of protein localization	44/539	87/18682	1.29415e-44	1.0307e-43	3.34311e-44	PANSSCG00000143/PANSSCG00001549/PANSSCG00001654/PANSSCG00001706/PANSSCG00001741/PANSSCG00001867/PANSSCG00001885/PANSSCG00001913/PANSSCG00001983/PANSSCG00002092/PANSSCG00002111/PANSSCG00002325/PANSSCG00002559/PANSSCG00002561/PANSSCG00002954/PANSSCG00003001/PANSSCG00003025/PANSSCG00003068/PANSSCG00003537/PANSSCG00003638/PANSSCG00003753/PANSSCG00003882/PANSSCG00003895/PANSSCG00004220/PANSSCG00004333…	44
GO:0033043	regulation of organelle organization	30/539	32/18682	1.34971e-44	1.07221e-43	3.47777e-44	PANSSCG00001634/PANSSCG00001663/PANSSCG00001884/PANSSCG00001885/PANSSCG00001977/PANSSCG00001983/PANSSCG00002108/PANSSCG00002111/PANSSCG00003025/PANSSCG00003181/PANSSCG00003537/PANSSCG00003895/PANSSCG00003925/PANSSCG00004455/PANSSCG00004519/PANSSCG00004676/PANSSCG00004997/PANSSCG00005522/PANSSCG00005539/PANSSCG00005675/PANSSCG00005919/PANSSCG00005923/PANSSCG00006091/PANSSCG00006134/PANSSCG00006206…	30
GO:0006952	defense response	48/539	111/18682	2.07028e-44	1.64046e-43	5.32089e-44	PANSSCG00000143/PANSSCG00000144/PANSSCG00000880/PANSSCG00001023/PANSSCG00001629/PANSSCG00001650/PANSSCG00001675/PANSSCG00001741/PANSSCG00002044/PANSSCG00002048/PANSSCG00002056/PANSSCG00002092/PANSSCG00002111/PANSSCG00002470/PANSSCG00003001/PANSSCG00003249/PANSSCG00003593/PANSSCG00003638/PANSSCG00003681/PANSSCG00003753/PANSSCG00003807/PANSSCG00003841/PANSSCG00003882/PANSSCG00003912/PANSSCG00003947…	48
GO:0048468	cell development	38/539	59/18682	2.48708e-44	1.96574e-43	6.37593e-44	PANSSCG00000563/PANSSCG00001248/PANSSCG00001582/PANSSCG00001583/PANSSCG00001632/PANSSCG00001637/PANSSCG00001654/PANSSCG00001679/PANSSCG00001731/PANSSCG00001800/PANSSCG00001936/PANSSCG00002111/PANSSCG00002296/PANSSCG00003031/PANSSCG00003463/PANSSCG00003553/PANSSCG00003585/PANSSCG00003633/PANSSCG00003686/PANSSCG00003986/PANSSCG00004006/PANSSCG00004593/PANSSCG00004597/PANSSCG00004638/PANSSCG00004676…	38
GO:0005740	mitochondrial envelope	34/539	44/18682	2.99131e-44	2.3583e-43	7.64923e-44	PANSSCG00000871/PANSSCG00000915/PANSSCG00001247/PANSSCG00001619/PANSSCG00001659/PANSSCG00001747/PANSSCG00001963/PANSSCG00002242/PANSSCG00002552/PANSSCG00003181/PANSSCG00003223/PANSSCG00003339/PANSSCG00003380/PANSSCG00003415/PANSSCG00003441/PANSSCG00003528/PANSSCG00004039/PANSSCG00004308/PANSSCG00004685/PANSSCG00004690/PANSSCG00004760/PANSSCG00004995/PANSSCG00005108/PANSSCG00005237/PANSSCG00005305…	34
GO:0009259	ribonucleotide metabolic process	29/539	30/18682	3.06672e-44	2.4056e-43	7.80265e-44	PANSSCG00001179/PANSSCG00001247/PANSSCG00001645/PANSSCG00001679/PANSSCG00001731/PANSSCG00001974/PANSSCG00002053/PANSSCG00002242/PANSSCG00002394/PANSSCG00002419/PANSSCG00002561/PANSSCG00003031/PANSSCG00003068/PANSSCG00003156/PANSSCG00003223/PANSSCG00003309/PANSSCG00003339/PANSSCG00003380/PANSSCG00003633/PANSSCG00004006/PANSSCG00004220/PANSSCG00005213/PANSSCG00005414/PANSSCG00005480/PANSSCG00005651…	29
GO:0099512	supramolecular fiber	29/539	30/18682	3.06672e-44	2.4056e-43	7.80265e-44	PANSSCG00001628/PANSSCG00001637/PANSSCG00001684/PANSSCG00001731/PANSSCG00001800/PANSSCG00001894/PANSSCG00001936/PANSSCG00001942/PANSSCG00001948/PANSSCG00001965/PANSSCG00002171/PANSSCG00002214/PANSSCG00002883/PANSSCG00002964/PANSSCG00003029/PANSSCG00003309/PANSSCG00003957/PANSSCG00003986/PANSSCG00004006/PANSSCG00004841/PANSSCG00005030/PANSSCG00005563/PANSSCG00005943/PANSSCG00006087/PANSSCG00006279…	29
GO:1902679	negative regulation of RNA biosynthetic process	28/539	28/18682	3.83298e-44	2.99164e-43	9.70349e-44	PANSSCG00000563/PANSSCG00001502/PANSSCG00001634/PANSSCG00001884/PANSSCG00001885/PANSSCG00002105/PANSSCG00002108/PANSSCG00002552/PANSSCG00002744/PANSSCG00003576/PANSSCG00003622/PANSSCG00003630/PANSSCG00003787/PANSSCG00003895/PANSSCG00004732/PANSSCG00005023/PANSSCG00005028/PANSSCG00005093/PANSSCG00005109/PANSSCG00005187/PANSSCG00005609/PANSSCG00005720/PANSSCG00005923/PANSSCG00006134/PANSSCG00006225…	28
GO:1903530	regulation of secretion by cell	28/539	28/18682	3.83298e-44	2.99164e-43	9.70349e-44	PANSSCG00000143/PANSSCG00000880/PANSSCG00001549/PANSSCG00001741/PANSSCG00001800/PANSSCG00001818/PANSSCG00001885/PANSSCG00002092/PANSSCG00002111/PANSSCG00002325/PANSSCG00002561/PANSSCG00003001/PANSSCG00003068/PANSSCG00003553/PANSSCG00003638/PANSSCG00003753/PANSSCG00003851/PANSSCG00003882/PANSSCG00003895/PANSSCG00004220/PANSSCG00004519/PANSSCG00004697/PANSSCG00004720/PANSSCG00005077/PANSSCG00005108…	28
GO:0006629	lipid metabolic process	58/539	185/18682	4.88235e-44	3.80117e-43	1.23292e-43	PANSSCG00000613/PANSSCG00000880/PANSSCG00001007/PANSSCG00001179/PANSSCG00001656/PANSSCG00001672/PANSSCG00001678/PANSSCG00001694/PANSSCG00001849/PANSSCG00001885/PANSSCG00001942/PANSSCG00001963/PANSSCG00002214/PANSSCG00002354/PANSSCG00002407/PANSSCG00002419/PANSSCG00002517/PANSSCG00002559/PANSSCG00002578/PANSSCG00002759/PANSSCG00002833/PANSSCG00002908/PANSSCG00002954/PANSSCG00003069/PANSSCG00003092…	58
GO:0010629	negative regulation of gene expression	65/539	248/18682	7.96185e-44	6.18331e-43	2.00558e-43	PANSSCG00000563/PANSSCG00000740/PANSSCG00000950/PANSSCG00000970/PANSSCG00000999/PANSSCG00001023/PANSSCG00001217/PANSSCG00001425/PANSSCG00001502/PANSSCG00001578/PANSSCG00001625/PANSSCG00001629/PANSSCG00001634/PANSSCG00001641/PANSSCG00001649/PANSSCG00001650/PANSSCG00001655/PANSSCG00001679/PANSSCG00001741/PANSSCG00001884/PANSSCG00001885/PANSSCG00002105/PANSSCG00002108/PANSSCG00002436/PANSSCG00002552…	65
GO:0005856	cytoskeleton	62/539	221/18682	9.01989e-44	6.98762e-43	2.26646e-43	PANSSCG00001628/PANSSCG00001637/PANSSCG00001645/PANSSCG00001679/PANSSCG00001684/PANSSCG00001688/PANSSCG00001731/PANSSCG00001800/PANSSCG00001849/PANSSCG00001887/PANSSCG00001894/PANSSCG00001936/PANSSCG00001948/PANSSCG00001965/PANSSCG00001983/PANSSCG00002003/PANSSCG00002062/PANSSCG00002111/PANSSCG00002171/PANSSCG00002214/PANSSCG00002394/PANSSCG00002548/PANSSCG00002555/PANSSCG00002701/PANSSCG00002861…	62
GO:0006163	purine nucleotide metabolic process	30/539	33/18682	1.44547e-43	1.11702e-42	3.6231e-43	PANSSCG00001179/PANSSCG00001247/PANSSCG00001645/PANSSCG00001679/PANSSCG00001731/PANSSCG00001974/PANSSCG00002053/PANSSCG00002242/PANSSCG00002394/PANSSCG00002419/PANSSCG00002561/PANSSCG00003031/PANSSCG00003068/PANSSCG00003156/PANSSCG00003223/PANSSCG00003309/PANSSCG00003339/PANSSCG00003380/PANSSCG00003633/PANSSCG00003841/PANSSCG00004006/PANSSCG00004220/PANSSCG00005213/PANSSCG00005414/PANSSCG00005480…	30
GO:0050776	regulation of immune response	38/539	61/18682	1.70592e-43	1.31503e-42	4.26534e-43	PANSSCG00000740/PANSSCG00001636/PANSSCG00001654/PANSSCG00001675/PANSSCG00001684/PANSSCG00001706/PANSSCG00001741/PANSSCG00001818/PANSSCG00001917/PANSSCG00002092/PANSSCG00002111/PANSSCG00002273/PANSSCG00002360/PANSSCG00002470/PANSSCG00002552/PANSSCG00002744/PANSSCG00002907/PANSSCG00003025/PANSSCG00003029/PANSSCG00003132/PANSSCG00003181/PANSSCG00003497/PANSSCG00003553/PANSSCG00003753/PANSSCG00003851…	38
GO:0042119	neutrophil activation	33/539	43/18682	8.51666e-43	6.54902e-42	2.1242e-42	PANSSCG00001179/PANSSCG00001645/PANSSCG00001654/PANSSCG00001678/PANSSCG00001818/PANSSCG00001840/PANSSCG00001867/PANSSCG00001963/PANSSCG00002044/PANSSCG00002470/PANSSCG00002536/PANSSCG00002578/PANSSCG00003001/PANSSCG00003119/PANSSCG00003537/PANSSCG00003585/PANSSCG00003638/PANSSCG00003912/PANSSCG00003957/PANSSCG00004216/PANSSCG00004527/PANSSCG00005064/PANSSCG00005137/PANSSCG00005186/PANSSCG00005255…	33
GO:0010038	response to metal ion	30/539	34/18682	1.1962e-42	9.1533e-42	2.9689e-42	PANSSCG00001007/PANSSCG00001631/PANSSCG00001637/PANSSCG00001963/PANSSCG00001974/PANSSCG00002105/PANSSCG00002214/PANSSCG00002394/PANSSCG00002470/PANSSCG00002548/PANSSCG00003376/PANSSCG00003497/PANSSCG00003525/PANSSCG00003576/PANSSCG00003633/PANSSCG00003941/PANSSCG00004039/PANSSCG00004365/PANSSCG00004517/PANSSCG00004532/PANSSCG00004563/PANSSCG00004676/PANSSCG00004903/PANSSCG00005028/PANSSCG00005675…	30
GO:0051223	regulation of protein transport	30/539	34/18682	1.1962e-42	9.1533e-42	2.9689e-42	PANSSCG00000143/PANSSCG00001549/PANSSCG00001654/PANSSCG00001706/PANSSCG00001741/PANSSCG00001885/PANSSCG00002092/PANSSCG00002111/PANSSCG00002325/PANSSCG00002561/PANSSCG00003001/PANSSCG00003025/PANSSCG00003068/PANSSCG00003638/PANSSCG00003753/PANSSCG00003882/PANSSCG00003895/PANSSCG00004220/PANSSCG00004519/PANSSCG00005077/PANSSCG00005093/PANSSCG00005108/PANSSCG00005492/PANSSCG00005539/PANSSCG00005667…	30
GO:0022613	ribonucleoprotein complex biogenesis	27/539	27/18682	1.39657e-42	1.05571e-41	3.42423e-42	PANSSCG00000950/PANSSCG00000999/PANSSCG00001425/PANSSCG00001625/PANSSCG00001649/PANSSCG00001654/PANSSCG00001655/PANSSCG00001679/PANSSCG00001730/PANSSCG00001810/PANSSCG00001884/PANSSCG00001886/PANSSCG00002436/PANSSCG00002618/PANSSCG00002957/PANSSCG00003005/PANSSCG00003102/PANSSCG00003407/PANSSCG00003454/PANSSCG00003547/PANSSCG00003613/PANSSCG00005362/PANSSCG00005499/PANSSCG00005785/PANSSCG00006024…	27
GO:0030554	adenyl nucleotide binding	27/539	27/18682	1.39657e-42	1.05571e-41	3.42423e-42	PANSSCG00001617/PANSSCG00001637/PANSSCG00001654/PANSSCG00001694/PANSSCG00001849/PANSSCG00002111/PANSSCG00002436/PANSSCG00002883/PANSSCG00002971/PANSSCG00003031/PANSSCG00003068/PANSSCG00003309/PANSSCG00003841/PANSSCG00003980/PANSSCG00004006/PANSSCG00004111/PANSSCG00004736/PANSSCG00005213/PANSSCG00005347/PANSSCG00005393/PANSSCG00005492/PANSSCG00005539/PANSSCG00005872/PANSSCG00005884/PANSSCG00005919…	27
GO:0031347	regulation of defense response	27/539	27/18682	1.39657e-42	1.05571e-41	3.42423e-42	PANSSCG00000740/PANSSCG00001636/PANSSCG00001654/PANSSCG00001675/PANSSCG00001741/PANSSCG00001917/PANSSCG00002360/PANSSCG00002470/PANSSCG00002552/PANSSCG00002744/PANSSCG00002907/PANSSCG00003025/PANSSCG00003132/PANSSCG00003497/PANSSCG00003753/PANSSCG00003851/PANSSCG00003882/PANSSCG00003895/PANSSCG00005151/PANSSCG00005255/PANSSCG00005601/PANSSCG00005675/PANSSCG00005939/PANSSCG00005948/PANSSCG00006000…	27
GO:0051674	localization of cell	27/539	27/18682	1.39657e-42	1.05571e-41	3.42423e-42	PANSSCG00001670/PANSSCG00001818/PANSSCG00001916/PANSSCG00001947/PANSSCG00002056/PANSSCG00002062/PANSSCG00002111/PANSSCG00002132/PANSSCG00002555/PANSSCG00003223/PANSSCG00003249/PANSSCG00003278/PANSSCG00003441/PANSSCG00003553/PANSSCG00004006/PANSSCG00004517/PANSSCG00004519/PANSSCG00004638/PANSSCG00004644/PANSSCG00004676/PANSSCG00004961/PANSSCG00005093/PANSSCG00005317/PANSSCG00005858/PANSSCG00005872…	27
GO:0098552	side of membrane	27/539	27/18682	1.39657e-42	1.05571e-41	3.42423e-42	PANSSCG00000950/PANSSCG00000999/PANSSCG00001217/PANSSCG00001425/PANSSCG00001549/PANSSCG00001625/PANSSCG00001655/PANSSCG00001694/PANSSCG00001867/PANSSCG00001942/PANSSCG00002111/PANSSCG00002548/PANSSCG00002552/PANSSCG00002697/PANSSCG00003102/PANSSCG00003181/PANSSCG00003753/PANSSCG00003882/PANSSCG00003947/PANSSCG00004467/PANSSCG00004638/PANSSCG00004676/PANSSCG00005137/PANSSCG00005899/PANSSCG00005923…	27
GO:0070201	regulation of establishment of protein localization	31/539	37/18682	1.55131e-42	1.16801e-41	3.78847e-42	PANSSCG00000143/PANSSCG00001549/PANSSCG00001654/PANSSCG00001706/PANSSCG00001741/PANSSCG00001885/PANSSCG00002092/PANSSCG00002111/PANSSCG00002325/PANSSCG00002561/PANSSCG00003001/PANSSCG00003025/PANSSCG00003068/PANSSCG00003638/PANSSCG00003753/PANSSCG00003882/PANSSCG00003895/PANSSCG00004220/PANSSCG00004519/PANSSCG00005077/PANSSCG00005093/PANSSCG00005108/PANSSCG00005492/PANSSCG00005539/PANSSCG00005667…	31
GO:0042327	positive regulation of phosphorylation	37/539	59/18682	1.5526e-42	1.16801e-41	3.78847e-42	PANSSCG00000880/PANSSCG00001549/PANSSCG00001654/PANSSCG00001675/PANSSCG00001678/PANSSCG00001737/PANSSCG00001741/PANSSCG00001887/PANSSCG00001913/PANSSCG00002056/PANSSCG00002111/PANSSCG00002470/PANSSCG00002548/PANSSCG00002552/PANSSCG00002561/PANSSCG00002971/PANSSCG00003001/PANSSCG00003181/PANSSCG00003249/PANSSCG00003753/PANSSCG00003807/PANSSCG00003882/PANSSCG00003895/PANSSCG00003980/PANSSCG00004006…	37
GO:0030030	cell projection organization	33/539	45/18682	1.21108e-41	9.08892e-41	2.94802e-41	PANSSCG00001582/PANSSCG00001583/PANSSCG00001617/PANSSCG00001632/PANSSCG00001654/PANSSCG00001947/PANSSCG00002111/PANSSCG00002540/PANSSCG00002578/PANSSCG00003031/PANSSCG00003537/PANSSCG00003553/PANSSCG00003585/PANSSCG00003686/PANSSCG00003957/PANSSCG00004333/PANSSCG00004519/PANSSCG00004593/PANSSCG00004676/PANSSCG00004736/PANSSCG00004997/PANSSCG00005064/PANSSCG00005093/PANSSCG00005347/PANSSCG00005415…	33
GO:0055065	metal ion homeostasis	28/539	30/18682	1.58031e-41	1.18315e-40	3.83759e-41	PANSSCG00001549/PANSSCG00001617/PANSSCG00001706/PANSSCG00001840/PANSSCG00002111/PANSSCG00002548/PANSSCG00002833/PANSSCG00002883/PANSSCG00003031/PANSSCG00003324/PANSSCG00003497/PANSSCG00003525/PANSSCG00003808/PANSSCG00003895/PANSSCG00004052/PANSSCG00004220/PANSSCG00004264/PANSSCG00004324/PANSSCG00004676/PANSSCG00004697/PANSSCG00005023/PANSSCG00005347/PANSSCG00005654/PANSSCG00005667/PANSSCG00005923…	28
GO:0030003	cellular cation homeostasis	27/539	28/18682	3.8069e-41	2.84333e-40	9.22245e-41	PANSSCG00001617/PANSSCG00001706/PANSSCG00001840/PANSSCG00001916/PANSSCG00002111/PANSSCG00002548/PANSSCG00002883/PANSSCG00003031/PANSSCG00003324/PANSSCG00003497/PANSSCG00003525/PANSSCG00003808/PANSSCG00003895/PANSSCG00004052/PANSSCG00004220/PANSSCG00004264/PANSSCG00004324/PANSSCG00004676/PANSSCG00004697/PANSSCG00005023/PANSSCG00005347/PANSSCG00005654/PANSSCG00005667/PANSSCG00005923/PANSSCG00005948…	27
GO:0040011	locomotion	30/539	36/18682	4.76217e-41	3.53988e-40	1.14817e-40	PANSSCG00001670/PANSSCG00001818/PANSSCG00001916/PANSSCG00001947/PANSSCG00002056/PANSSCG00002062/PANSSCG00002111/PANSSCG00002132/PANSSCG00002555/PANSSCG00003031/PANSSCG00003223/PANSSCG00003249/PANSSCG00003278/PANSSCG00003441/PANSSCG00003553/PANSSCG00003585/PANSSCG00004006/PANSSCG00004242/PANSSCG00004517/PANSSCG00004519/PANSSCG00004638/PANSSCG00004644/PANSSCG00004676/PANSSCG00004961/PANSSCG00005093…	30
GO:0050778	positive regulation of immune response	30/539	36/18682	4.76217e-41	3.53988e-40	1.14817e-40	PANSSCG00001654/PANSSCG00001675/PANSSCG00001684/PANSSCG00001706/PANSSCG00001741/PANSSCG00001818/PANSSCG00001917/PANSSCG00002092/PANSSCG00002111/PANSSCG00002470/PANSSCG00002552/PANSSCG00002744/PANSSCG00002907/PANSSCG00003025/PANSSCG00003029/PANSSCG00003132/PANSSCG00003181/PANSSCG00003497/PANSSCG00003553/PANSSCG00003753/PANSSCG00003882/PANSSCG00004006/PANSSCG00004467/PANSSCG00004961/PANSSCG00005151…	30
GO:0043086	negative regulation of catalytic activity	34/539	50/18682	5.05809e-41	3.71337e-40	1.20444e-40	PANSSCG00001983/PANSSCG00002056/PANSSCG00002111/PANSSCG00002171/PANSSCG00002273/PANSSCG00002354/PANSSCG00002383/PANSSCG00002919/PANSSCG00003025/PANSSCG00003298/PANSSCG00003528/PANSSCG00003633/PANSSCG00003912/PANSSCG00004216/PANSSCG00004627/PANSSCG00004897/PANSSCG00004966/PANSSCG00005023/PANSSCG00005255/PANSSCG00005505/PANSSCG00005557/PANSSCG00005868/PANSSCG00005878/PANSSCG00005899/PANSSCG00005939…	34
GO:0006875	cellular metal ion homeostasis	26/539	26/18682	5.07882e-41	3.71337e-40	1.20444e-40	PANSSCG00001617/PANSSCG00001706/PANSSCG00001840/PANSSCG00002111/PANSSCG00002548/PANSSCG00002883/PANSSCG00003031/PANSSCG00003324/PANSSCG00003497/PANSSCG00003525/PANSSCG00003808/PANSSCG00003895/PANSSCG00004052/PANSSCG00004220/PANSSCG00004264/PANSSCG00004324/PANSSCG00004676/PANSSCG00004697/PANSSCG00005023/PANSSCG00005347/PANSSCG00005654/PANSSCG00005667/PANSSCG00005923/PANSSCG00005948/PANSSCG00006217…	26
GO:0016053	organic acid biosynthetic process	26/539	26/18682	5.07882e-41	3.71337e-40	1.20444e-40	PANSSCG00001645/PANSSCG00001974/PANSSCG00002394/PANSSCG00002419/PANSSCG00002561/PANSSCG00002833/PANSSCG00002888/PANSSCG00003068/PANSSCG00003955/PANSSCG00004039/PANSSCG00004264/PANSSCG00004449/PANSSCG00004496/PANSSCG00004532/PANSSCG00004914/PANSSCG00005023/PANSSCG00005084/PANSSCG00005331/PANSSCG00005492/PANSSCG00005654/PANSSCG00005667/PANSSCG00005775/PANSSCG00006103/PANSSCG00006346/PANSSCG00006456…	26
GO:0044057	regulation of system process	26/539	26/18682	5.07882e-41	3.71337e-40	1.20444e-40	PANSSCG00001179/PANSSCG00001549/PANSSCG00001617/PANSSCG00001706/PANSSCG00001885/PANSSCG00001983/PANSSCG00002092/PANSSCG00002559/PANSSCG00002883/PANSSCG00002954/PANSSCG00003031/PANSSCG00003309/PANSSCG00003655/PANSSCG00004006/PANSSCG00004264/PANSSCG00004676/PANSSCG00004697/PANSSCG00005077/PANSSCG00005108/PANSSCG00005277/PANSSCG00005347/PANSSCG00005654/PANSSCG00006037/PANSSCG00006172/PANSSCG00006206…	26
GO:0046394	carboxylic acid biosynthetic process	26/539	26/18682	5.07882e-41	3.71337e-40	1.20444e-40	PANSSCG00001645/PANSSCG00001974/PANSSCG00002394/PANSSCG00002419/PANSSCG00002561/PANSSCG00002833/PANSSCG00002888/PANSSCG00003068/PANSSCG00003955/PANSSCG00004039/PANSSCG00004264/PANSSCG00004449/PANSSCG00004496/PANSSCG00004532/PANSSCG00004914/PANSSCG00005023/PANSSCG00005084/PANSSCG00005331/PANSSCG00005492/PANSSCG00005654/PANSSCG00005667/PANSSCG00005775/PANSSCG00006103/PANSSCG00006346/PANSSCG00006456…	26
GO:0090407	organophosphate biosynthetic process	26/539	26/18682	5.07882e-41	3.71337e-40	1.20444e-40	PANSSCG00000613/PANSSCG00001247/PANSSCG00001645/PANSSCG00001942/PANSSCG00001974/PANSSCG00002053/PANSSCG00002394/PANSSCG00002419/PANSSCG00002559/PANSSCG00002561/PANSSCG00002954/PANSSCG00003068/PANSSCG00003156/PANSSCG00003339/PANSSCG00003380/PANSSCG00003497/PANSSCG00003553/PANSSCG00003582/PANSSCG00003633/PANSSCG00003841/PANSSCG00004220/PANSSCG00004517/PANSSCG00005414/PANSSCG00005813/PANSSCG00006037…	26
GO:0098660	inorganic ion transmembrane transport	26/539	26/18682	5.07882e-41	3.71337e-40	1.20444e-40	PANSSCG00001247/PANSSCG00001617/PANSSCG00001706/PANSSCG00001707/PANSSCG00001916/PANSSCG00002034/PANSSCG00002548/PANSSCG00002883/PANSSCG00003031/PANSSCG00003339/PANSSCG00003380/PANSSCG00003497/PANSSCG00003655/PANSSCG00003895/PANSSCG00003899/PANSSCG00003907/PANSSCG00004324/PANSSCG00004841/PANSSCG00004903/PANSSCG00005030/PANSSCG00005215/PANSSCG00005311/PANSSCG00005347/PANSSCG00005534/PANSSCG00005607…	26
GO:0006873	cellular ion homeostasis	28/539	31/18682	1.5898e-40	1.15427e-39	3.7439e-40	PANSSCG00001617/PANSSCG00001706/PANSSCG00001840/PANSSCG00001916/PANSSCG00002111/PANSSCG00002548/PANSSCG00002883/PANSSCG00003031/PANSSCG00003324/PANSSCG00003497/PANSSCG00003525/PANSSCG00003808/PANSSCG00003895/PANSSCG00004052/PANSSCG00004220/PANSSCG00004264/PANSSCG00004324/PANSSCG00004676/PANSSCG00004697/PANSSCG00005023/PANSSCG00005311/PANSSCG00005347/PANSSCG00005654/PANSSCG00005667/PANSSCG00005923…	28
GO:0010817	regulation of hormone levels	28/539	31/18682	1.5898e-40	1.15427e-39	3.7439e-40	PANSSCG00000880/PANSSCG00001179/PANSSCG00001549/PANSSCG00001885/PANSSCG00002282/PANSSCG00002325/PANSSCG00002354/PANSSCG00002517/PANSSCG00002561/PANSSCG00003068/PANSSCG00003069/PANSSCG00003119/PANSSCG00003753/PANSSCG00003882/PANSSCG00003895/PANSSCG00004220/PANSSCG00004532/PANSSCG00004914/PANSSCG00005077/PANSSCG00005108/PANSSCG00005277/PANSSCG00005452/PANSSCG00005492/PANSSCG00005609/PANSSCG00006035…	28
GO:0012501	programmed cell death	28/539	31/18682	1.5898e-40	1.15427e-39	3.7439e-40	PANSSCG00001645/PANSSCG00001811/PANSSCG00001972/PANSSCG00002056/PANSSCG00002092/PANSSCG00002105/PANSSCG00002111/PANSSCG00002883/PANSSCG00002971/PANSSCG00003223/PANSSCG00003324/PANSSCG00003537/PANSSCG00003576/PANSSCG00003980/PANSSCG00004597/PANSSCG00004676/PANSSCG00004966/PANSSCG00005028/PANSSCG00005093/PANSSCG00005108/PANSSCG00005555/PANSSCG00005675/PANSSCG00005868/PANSSCG00005884/PANSSCG00006087…	28
GO:2000145	regulation of cell motility	31/539	40/18682	1.68395e-40	1.21979e-39	3.95644e-40	PANSSCG00000880/PANSSCG00001550/PANSSCG00001582/PANSSCG00001583/PANSSCG00001674/PANSSCG00001741/PANSSCG00001947/PANSSCG00001965/PANSSCG00002111/PANSSCG00003025/PANSSCG00003441/PANSSCG00003553/PANSSCG00003807/PANSSCG00003851/PANSSCG00003895/PANSSCG00004006/PANSSCG00004455/PANSSCG00004638/PANSSCG00004644/PANSSCG00004676/PANSSCG00004700/PANSSCG00004732/PANSSCG00005023/PANSSCG00005496/PANSSCG00005667…	31
GO:1903507	negative regulation of nucleic acid-templated transcription	27/539	29/18682	5.37391e-40	3.88364e-39	1.25967e-39	PANSSCG00000563/PANSSCG00001502/PANSSCG00001634/PANSSCG00001884/PANSSCG00001885/PANSSCG00002105/PANSSCG00002108/PANSSCG00002552/PANSSCG00002744/PANSSCG00003576/PANSSCG00003622/PANSSCG00003630/PANSSCG00003787/PANSSCG00003895/PANSSCG00004732/PANSSCG00005028/PANSSCG00005093/PANSSCG00005109/PANSSCG00005187/PANSSCG00005609/PANSSCG00005720/PANSSCG00005923/PANSSCG00006134/PANSSCG00006225/PANSSCG00006236…	27
GO:0007584	response to nutrient	26/539	27/18682	1.33497e-39	9.60318e-39	3.11482e-39	PANSSCG00001674/PANSSCG00001675/PANSSCG00001714/PANSSCG00001796/PANSSCG00001963/PANSSCG00002105/PANSSCG00003497/PANSSCG00003576/PANSSCG00003638/PANSSCG00003912/PANSSCG00003947/PANSSCG00004039/PANSSCG00004216/PANSSCG00004527/PANSSCG00004532/PANSSCG00004729/PANSSCG00005028/PANSSCG00005305/PANSSCG00005661/PANSSCG00005758/PANSSCG00005878/PANSSCG00005939/PANSSCG00006239/PANSSCG00006353/PANSSCG00006456…	26
GO:0051960	regulation of nervous system development	26/539	27/18682	1.33497e-39	9.60318e-39	3.11482e-39	PANSSCG00001674/PANSSCG00001983/PANSSCG00002092/PANSSCG00002111/PANSSCG00002132/PANSSCG00002540/PANSSCG00002571/PANSSCG00003119/PANSSCG00003895/PANSSCG00004333/PANSSCG00004372/PANSSCG00004455/PANSSCG00004644/PANSSCG00004676/PANSSCG00004697/PANSSCG00004700/PANSSCG00004997/PANSSCG00005093/PANSSCG00005621/PANSSCG00005664/PANSSCG00005872/PANSSCG00005923/PANSSCG00005948/PANSSCG00006137/PANSSCG00006225…	26
GO:0070925	organelle assembly	29/539	35/18682	1.45126e-39	1.04157e-38	3.37838e-39	PANSSCG00001625/PANSSCG00001637/PANSSCG00001649/PANSSCG00001655/PANSSCG00001731/PANSSCG00001800/PANSSCG00001936/PANSSCG00002386/PANSSCG00002540/PANSSCG00003005/PANSSCG00003074/PANSSCG00003102/PANSSCG00003181/PANSSCG00003229/PANSSCG00003407/PANSSCG00003454/PANSSCG00003537/PANSSCG00003957/PANSSCG00003986/PANSSCG00004333/PANSSCG00004736/PANSSCG00005415/PANSSCG00005499/PANSSCG00005621/PANSSCG00005664…	29
GO:0032504	multicellular organism reproduction	25/539	25/18682	1.84349e-39	1.31402e-38	4.26205e-39	PANSSCG00001248/PANSSCG00001641/PANSSCG00001670/PANSSCG00001674/PANSSCG00001675/PANSSCG00001679/PANSSCG00001741/PANSSCG00001916/PANSSCG00001983/PANSSCG00002105/PANSSCG00002579/PANSSCG00003525/PANSSCG00003576/PANSSCG00003593/PANSSCG00004676/PANSSCG00004697/PANSSCG00004766/PANSSCG00005023/PANSSCG00005028/PANSSCG00005137/PANSSCG00005277/PANSSCG00005496/PANSSCG00005675/PANSSCG00005923/PANSSCG00005939	25
GO:0044456	obsolete synapse part	25/539	25/18682	1.84349e-39	1.31402e-38	4.26205e-39	PANSSCG00001617/PANSSCG00001632/PANSSCG00001800/PANSSCG00001867/PANSSCG00001971/PANSSCG00001983/PANSSCG00001999/PANSSCG00002003/PANSSCG00002108/PANSSCG00002111/PANSSCG00002623/PANSSCG00003031/PANSSCG00003088/PANSSCG00003633/PANSSCG00003851/PANSSCG00003987/PANSSCG00004676/PANSSCG00004697/PANSSCG00005277/PANSSCG00005347/PANSSCG00005492/PANSSCG00005522/PANSSCG00006137/PANSSCG00006521/PANSSCG00006623	25
GO:0070482	response to oxygen levels	25/539	25/18682	1.84349e-39	1.31402e-38	4.26205e-39	PANSSCG00001197/PANSSCG00001645/PANSSCG00001706/PANSSCG00001963/PANSSCG00001965/PANSSCG00001999/PANSSCG00002105/PANSSCG00002272/PANSSCG00002407/PANSSCG00002552/PANSSCG00002697/PANSSCG00003088/PANSSCG00003553/PANSSCG00003576/PANSSCG00004039/PANSSCG00004263/PANSSCG00004638/PANSSCG00004676/PANSSCG00005028/PANSSCG00005081/PANSSCG00005539/PANSSCG00005758/PANSSCG00005919/PANSSCG00006456/PANSSCG00006598	25
GO:0071466	cellular response to xenobiotic stimulus	27/539	30/18682	5.23168e-39	3.72057e-38	1.20678e-38	PANSSCG00001007/PANSSCG00001654/PANSSCG00001999/PANSSCG00002214/PANSSCG00002354/PANSSCG00003088/PANSSCG00003192/PANSSCG00003298/PANSSCG00003376/PANSSCG00003955/PANSSCG00004039/PANSSCG00004264/PANSSCG00004532/PANSSCG00004563/PANSSCG00004841/PANSSCG00004861/PANSSCG00004897/PANSSCG00004914/PANSSCG00005077/PANSSCG00005480/PANSSCG00005654/PANSSCG00005778/PANSSCG00005823/PANSSCG00006420/PANSSCG00006456…	27
GO:0044877	protein-containing complex binding	56/539	205/18682	7.00581e-39	4.97094e-38	1.61234e-38	PANSSCG00001248/PANSSCG00001425/PANSSCG00001549/PANSSCG00001625/PANSSCG00001634/PANSSCG00001636/PANSSCG00001655/PANSSCG00001679/PANSSCG00001730/PANSSCG00001731/PANSSCG00001800/PANSSCG00001818/PANSSCG00001884/PANSSCG00001885/PANSSCG00001965/PANSSCG00001983/PANSSCG00002111/PANSSCG00002272/PANSSCG00002273/PANSSCG00002354/PANSSCG00002360/PANSSCG00002697/PANSSCG00002919/PANSSCG00003181/PANSSCG00003363…	56
GO:0051346	negative regulation of hydrolase activity	28/539	33/18682	7.95594e-39	5.6323e-38	1.82686e-38	PANSSCG00001983/PANSSCG00002056/PANSSCG00002111/PANSSCG00002171/PANSSCG00002273/PANSSCG00002383/PANSSCG00002919/PANSSCG00003025/PANSSCG00003298/PANSSCG00003528/PANSSCG00003633/PANSSCG00003912/PANSSCG00004216/PANSSCG00004627/PANSSCG00004897/PANSSCG00005023/PANSSCG00005255/PANSSCG00005505/PANSSCG00005878/PANSSCG00005899/PANSSCG00005939/PANSSCG00006091/PANSSCG00006103/PANSSCG00006113/PANSSCG00006239…	28
GO:0061024	membrane organization	31/539	43/18682	8.71785e-39	6.15772e-38	1.99728e-38	PANSSCG00001619/PANSSCG00001694/PANSSCG00001977/PANSSCG00002108/PANSSCG00002116/PANSSCG00002296/PANSSCG00002470/PANSSCG00002552/PANSSCG00003119/PANSSCG00003223/PANSSCG00003380/PANSSCG00003537/PANSSCG00003585/PANSSCG00003593/PANSSCG00003633/PANSSCG00004111/PANSSCG00004308/PANSSCG00004519/PANSSCG00004598/PANSSCG00004685/PANSSCG00004720/PANSSCG00005108/PANSSCG00005237/PANSSCG00005574/PANSSCG00005675…	31
GO:1990904	ribonucleoprotein complex	54/539	188/18682	8.82045e-39	6.21613e-38	2.01622e-38	PANSSCG00000950/PANSSCG00000999/PANSSCG00001023/PANSSCG00001217/PANSSCG00001425/PANSSCG00001578/PANSSCG00001625/PANSSCG00001628/PANSSCG00001629/PANSSCG00001649/PANSSCG00001650/PANSSCG00001655/PANSSCG00001659/PANSSCG00001663/PANSSCG00001730/PANSSCG00001810/PANSSCG00001884/PANSSCG00001886/PANSSCG00001965/PANSSCG00002386/PANSSCG00002536/PANSSCG00002552/PANSSCG00002617/PANSSCG00002618/PANSSCG00002661…	54
GO:0006605	protein targeting	32/539	47/18682	1.07422e-38	7.55339e-38	2.44997e-38	PANSSCG00000950/PANSSCG00000970/PANSSCG00000999/PANSSCG00001217/PANSSCG00001425/PANSSCG00001578/PANSSCG00001619/PANSSCG00001625/PANSSCG00001629/PANSSCG00001649/PANSSCG00001650/PANSSCG00001655/PANSSCG00001657/PANSSCG00001963/PANSSCG00002151/PANSSCG00002552/PANSSCG00002918/PANSSCG00003005/PANSSCG00003181/PANSSCG00003298/PANSSCG00003454/PANSSCG00003947/PANSSCG00004527/PANSSCG00004685/PANSSCG00004688…	32
GO:0002253	activation of immune response	26/539	28/18682	1.81947e-38	1.27649e-37	4.14034e-38	PANSSCG00001654/PANSSCG00001675/PANSSCG00001684/PANSSCG00001706/PANSSCG00001741/PANSSCG00001917/PANSSCG00002092/PANSSCG00002111/PANSSCG00002470/PANSSCG00002552/PANSSCG00002744/PANSSCG00002907/PANSSCG00003029/PANSSCG00003132/PANSSCG00003497/PANSSCG00003553/PANSSCG00003753/PANSSCG00003882/PANSSCG00004006/PANSSCG00004467/PANSSCG00004961/PANSSCG00005151/PANSSCG00005601/PANSSCG00005675/PANSSCG00005858…	26
GO:0060548	negative regulation of cell death	38/539	76/18682	2.10297e-38	1.47208e-37	4.77474e-38	PANSSCG00000880/PANSSCG00001654/PANSSCG00001675/PANSSCG00001678/PANSSCG00001840/PANSSCG00001884/PANSSCG00001963/PANSSCG00002044/PANSSCG00002056/PANSSCG00002111/PANSSCG00002552/PANSSCG00002744/PANSSCG00003324/PANSSCG00003363/PANSSCG00003497/PANSSCG00004143/PANSSCG00004205/PANSSCG00004263/PANSSCG00004455/PANSSCG00004489/PANSSCG00004519/PANSSCG00004597/PANSSCG00004638/PANSSCG00004676/PANSSCG00004732…	38
GO:0032559	adenyl ribonucleotide binding	27/539	31/18682	3.94724e-38	2.75689e-37	8.94206e-38	PANSSCG00001617/PANSSCG00001637/PANSSCG00001654/PANSSCG00001694/PANSSCG00001849/PANSSCG00002111/PANSSCG00002436/PANSSCG00002883/PANSSCG00002971/PANSSCG00003031/PANSSCG00003068/PANSSCG00003309/PANSSCG00003841/PANSSCG00003980/PANSSCG00004006/PANSSCG00004111/PANSSCG00004736/PANSSCG00005213/PANSSCG00005347/PANSSCG00005393/PANSSCG00005492/PANSSCG00005539/PANSSCG00005872/PANSSCG00005884/PANSSCG00005919…	27
GO:0009894	regulation of catabolic process	24/539	24/18682	6.67882e-38	4.59279e-37	1.48969e-37	PANSSCG00001654/PANSSCG00001678/PANSSCG00001885/PANSSCG00001977/PANSSCG00002111/PANSSCG00002552/PANSSCG00002561/PANSSCG00003223/PANSSCG00003807/PANSSCG00004333/PANSSCG00004676/PANSSCG00005023/PANSSCG00005505/PANSSCG00005522/PANSSCG00005557/PANSSCG00005621/PANSSCG00005664/PANSSCG00005675/PANSSCG00005720/PANSSCG00005758/PANSSCG00005875/PANSSCG00006206/PANSSCG00006376/PANSSCG00006529	24
GO:0022804	active transmembrane transporter activity	24/539	24/18682	6.67882e-38	4.59279e-37	1.48969e-37	PANSSCG00000871/PANSSCG00000915/PANSSCG00001617/PANSSCG00001694/PANSSCG00001707/PANSSCG00001849/PANSSCG00001916/PANSSCG00002034/PANSSCG00002282/PANSSCG00002883/PANSSCG00003031/PANSSCG00003907/PANSSCG00004111/PANSSCG00004588/PANSSCG00004903/PANSSCG00005108/PANSSCG00005215/PANSSCG00005237/PANSSCG00005311/PANSSCG00005347/PANSSCG00005534/PANSSCG00005991/PANSSCG00006172/PANSSCG00006278	24
GO:0044451	obsolete nucleoplasm part	24/539	24/18682	6.67882e-38	4.59279e-37	1.48969e-37	PANSSCG00000985/PANSSCG00001670/PANSSCG00001906/PANSSCG00001926/PANSSCG00001936/PANSSCG00001965/PANSSCG00002095/PANSSCG00002111/PANSSCG00002536/PANSSCG00002661/PANSSCG00002744/PANSSCG00002971/PANSSCG00003622/PANSSCG00003980/PANSSCG00004041/PANSSCG00004170/PANSSCG00004294/PANSSCG00004386/PANSSCG00004732/PANSSCG00005093/PANSSCG00005720/PANSSCG00006134/PANSSCG00006236/PANSSCG00006494	24
GO:0051347	positive regulation of transferase activity	24/539	24/18682	6.67882e-38	4.59279e-37	1.48969e-37	PANSSCG00000880/PANSSCG00001654/PANSSCG00001741/PANSSCG00001887/PANSSCG00002056/PANSSCG00002111/PANSSCG00002548/PANSSCG00002552/PANSSCG00002561/PANSSCG00002971/PANSSCG00003181/PANSSCG00003407/PANSSCG00003753/PANSSCG00003882/PANSSCG00003980/PANSSCG00004676/PANSSCG00005393/PANSSCG00005667/PANSSCG00005675/PANSSCG00005948/PANSSCG00006184/PANSSCG00006206/PANSSCG00006297/PANSSCG00006635	24
GO:0071229	cellular response to acid chemical	24/539	24/18682	6.67882e-38	4.59279e-37	1.48969e-37	PANSSCG00001549/PANSSCG00001617/PANSSCG00001674/PANSSCG00001675/PANSSCG00001694/PANSSCG00001885/PANSSCG00002105/PANSSCG00002132/PANSSCG00002407/PANSSCG00002548/PANSSCG00003309/PANSSCG00003576/PANSSCG00003638/PANSSCG00003947/PANSSCG00004143/PANSSCG00004205/PANSSCG00004263/PANSSCG00004372/PANSSCG00004489/PANSSCG00004676/PANSSCG00005028/PANSSCG00005081/PANSSCG00005347/PANSSCG00006518	24
GO:0071496	cellular response to external stimulus	24/539	24/18682	6.67882e-38	4.59279e-37	1.48969e-37	PANSSCG00001649/PANSSCG00001663/PANSSCG00001674/PANSSCG00001675/PANSSCG00001706/PANSSCG00001885/PANSSCG00002056/PANSSCG00002272/PANSSCG00002386/PANSSCG00002394/PANSSCG00002407/PANSSCG00002513/PANSSCG00003074/PANSSCG00003454/PANSSCG00003947/PANSSCG00004455/PANSSCG00004729/PANSSCG00005081/PANSSCG00005137/PANSSCG00005277/PANSSCG00005305/PANSSCG00005492/PANSSCG00005948/PANSSCG00006518	24
GO:1901653	cellular response to peptide	24/539	24/18682	6.67882e-38	4.59279e-37	1.48969e-37	PANSSCG00001023/PANSSCG00001549/PANSSCG00001617/PANSSCG00001714/PANSSCG00001796/PANSSCG00001885/PANSSCG00001999/PANSSCG00002394/PANSSCG00002407/PANSSCG00003088/PANSSCG00003309/PANSSCG00003638/PANSSCG00003925/PANSSCG00004039/PANSSCG00004663/PANSSCG00004732/PANSSCG00005081/PANSSCG00005255/PANSSCG00005347/PANSSCG00005913/PANSSCG00006192/PANSSCG00006265/PANSSCG00006456/PANSSCG00006518	24
GO:0046983	protein dimerization activity	57/539	224/18682	1.04897e-37	7.19755e-37	2.33455e-37	PANSSCG00001023/PANSSCG00001654/PANSSCG00001678/PANSSCG00001679/PANSSCG00001800/PANSSCG00001942/PANSSCG00001963/PANSSCG00001965/PANSSCG00002108/PANSSCG00002273/PANSSCG00002354/PANSSCG00002517/PANSSCG00002548/PANSSCG00002578/PANSSCG00002697/PANSSCG00002883/PANSSCG00002971/PANSSCG00003068/PANSSCG00003069/PANSSCG00003309/PANSSCG00003376/PANSSCG00003528/PANSSCG00003633/PANSSCG00003655/PANSSCG00003681…	57
GO:0060627	regulation of vesicle-mediated transport	26/539	29/18682	1.71225e-37	1.17229e-36	3.80236e-37	PANSSCG00001582/PANSSCG00001583/PANSSCG00001741/PANSSCG00001818/PANSSCG00001887/PANSSCG00001913/PANSSCG00001917/PANSSCG00001965/PANSSCG00002111/PANSSCG00002470/PANSSCG00002540/PANSSCG00003132/PANSSCG00003497/PANSSCG00003553/PANSSCG00003851/PANSSCG00004598/PANSSCG00004720/PANSSCG00004997/PANSSCG00005255/PANSSCG00005557/PANSSCG00005675/PANSSCG00005923/PANSSCG00006334/PANSSCG00006466/PANSSCG00006529…	26
GO:0043269	regulation of ion transport	28/539	35/18682	2.13651e-37	1.45956e-36	4.73412e-37	PANSSCG00000880/PANSSCG00001549/PANSSCG00001706/PANSSCG00001707/PANSSCG00001867/PANSSCG00001965/PANSSCG00002111/PANSSCG00002548/PANSSCG00002559/PANSSCG00002833/PANSSCG00002954/PANSSCG00003031/PANSSCG00003415/PANSSCG00003497/PANSSCG00004006/PANSSCG00004264/PANSSCG00004676/PANSSCG00004697/PANSSCG00004841/PANSSCG00005023/PANSSCG00005108/PANSSCG00005215/PANSSCG00005534/PANSSCG00005654/PANSSCG00005667…	28
GO:0048732	gland development	25/539	27/18682	6.13238e-37	4.17109e-36	1.35291e-36	PANSSCG00001248/PANSSCG00001678/PANSSCG00001999/PANSSCG00002111/PANSSCG00002394/PANSSCG00002548/PANSSCG00002617/PANSSCG00003031/PANSSCG00003088/PANSSCG00004039/PANSSCG00004263/PANSSCG00004638/PANSSCG00004644/PANSSCG00004697/PANSSCG00004729/PANSSCG00004861/PANSSCG00004903/PANSSCG00005023/PANSSCG00005093/PANSSCG00005108/PANSSCG00005609/PANSSCG00006075/PANSSCG00006356/PANSSCG00006456/PANSSCG00006494	25
GO:0051345	positive regulation of hydrolase activity	25/539	27/18682	6.13238e-37	4.17109e-36	1.35291e-36	PANSSCG00001248/PANSSCG00001549/PANSSCG00001550/PANSSCG00001654/PANSSCG00001741/PANSSCG00002056/PANSSCG00002062/PANSSCG00002394/PANSSCG00003025/PANSSCG00003181/PANSSCG00003223/PANSSCG00003249/PANSSCG00003441/PANSSCG00003537/PANSSCG00003851/PANSSCG00004676/PANSSCG00004997/PANSSCG00005023/PANSSCG00005557/PANSSCG00005899/PANSSCG00005913/PANSSCG00005939/PANSSCG00006206/PANSSCG00006334/PANSSCG00006529	25
GO:0072657	protein localization to membrane	30/539	43/18682	7.41458e-37	5.03225e-36	1.63223e-36	PANSSCG00000950/PANSSCG00000970/PANSSCG00000999/PANSSCG00001217/PANSSCG00001425/PANSSCG00001578/PANSSCG00001619/PANSSCG00001625/PANSSCG00001629/PANSSCG00001649/PANSSCG00001650/PANSSCG00001655/PANSSCG00001706/PANSSCG00002151/PANSSCG00002552/PANSSCG00002918/PANSSCG00003005/PANSSCG00003181/PANSSCG00003223/PANSSCG00003454/PANSSCG00003585/PANSSCG00003633/PANSSCG00003655/PANSSCG00003947/PANSSCG00004519…	30
GO:0045597	positive regulation of cell differentiation	35/539	66/18682	1.19559e-36	8.09684e-36	2.62624e-36	PANSSCG00001549/PANSSCG00001654/PANSSCG00001674/PANSSCG00001741/PANSSCG00001983/PANSSCG00002111/PANSSCG00002132/PANSSCG00002571/PANSSCG00002971/PANSSCG00003324/PANSSCG00003567/PANSSCG00003753/PANSSCG00003807/PANSSCG00003882/PANSSCG00003980/PANSSCG00004333/PANSSCG00004372/PANSSCG00004455/PANSSCG00004597/PANSSCG00004644/PANSSCG00004676/PANSSCG00004700/PANSSCG00004997/PANSSCG00005093/PANSSCG00005108…	35
GO:0036293	response to decreased oxygen levels	24/539	25/18682	1.62546e-36	1.09604e-35	3.55506e-36	PANSSCG00001197/PANSSCG00001645/PANSSCG00001706/PANSSCG00001963/PANSSCG00001965/PANSSCG00001999/PANSSCG00002105/PANSSCG00002272/PANSSCG00002407/PANSSCG00002552/PANSSCG00002697/PANSSCG00003088/PANSSCG00003553/PANSSCG00003576/PANSSCG00004039/PANSSCG00004638/PANSSCG00004676/PANSSCG00005028/PANSSCG00005081/PANSSCG00005539/PANSSCG00005758/PANSSCG00005919/PANSSCG00006456/PANSSCG00006598	24
GO:0048609	multicellular organismal reproductive process	24/539	25/18682	1.62546e-36	1.09604e-35	3.55506e-36	PANSSCG00001248/PANSSCG00001641/PANSSCG00001670/PANSSCG00001674/PANSSCG00001675/PANSSCG00001679/PANSSCG00001741/PANSSCG00001916/PANSSCG00001983/PANSSCG00002105/PANSSCG00002579/PANSSCG00003525/PANSSCG00003576/PANSSCG00004676/PANSSCG00004697/PANSSCG00004766/PANSSCG00005023/PANSSCG00005028/PANSSCG00005137/PANSSCG00005277/PANSSCG00005496/PANSSCG00005675/PANSSCG00005923/PANSSCG00005939	24
GO:0010563	negative regulation of phosphorus metabolic process	23/539	23/18682	2.41512e-36	1.59408e-35	5.17045e-36	PANSSCG00002111/PANSSCG00002171/PANSSCG00002273/PANSSCG00002559/PANSSCG00002954/PANSSCG00003223/PANSSCG00003567/PANSSCG00003633/PANSSCG00004006/PANSSCG00004966/PANSSCG00005023/PANSSCG00005255/PANSSCG00005505/PANSSCG00005868/PANSSCG00005875/PANSSCG00006037/PANSSCG00006113/PANSSCG00006205/PANSSCG00006206/PANSSCG00006225/PANSSCG00006362/PANSSCG00006516/PANSSCG00006529	23
GO:0016054	organic acid catabolic process	23/539	23/18682	2.41512e-36	1.59408e-35	5.17045e-36	PANSSCG00001631/PANSSCG00002043/PANSSCG00002272/PANSSCG00002833/PANSSCG00002908/PANSSCG00003832/PANSSCG00004031/PANSSCG00004517/PANSSCG00004527/PANSSCG00004891/PANSSCG00005084/PANSSCG00005186/PANSSCG00005319/PANSSCG00005452/PANSSCG00005480/PANSSCG00005492/PANSSCG00005667/PANSSCG00005810/PANSSCG00005823/PANSSCG00006077/PANSSCG00006097/PANSSCG00006346/PANSSCG00006438	23
GO:0031400	negative regulation of protein modification process	23/539	23/18682	2.41512e-36	1.59408e-35	5.17045e-36	PANSSCG00001884/PANSSCG00002108/PANSSCG00002111/PANSSCG00002171/PANSSCG00002273/PANSSCG00002559/PANSSCG00002954/PANSSCG00003025/PANSSCG00003181/PANSSCG00003567/PANSSCG00004006/PANSSCG00004966/PANSSCG00005023/PANSSCG00005255/PANSSCG00005868/PANSSCG00005875/PANSSCG00006037/PANSSCG00006205/PANSSCG00006206/PANSSCG00006362/PANSSCG00006494/PANSSCG00006516/PANSSCG00006529	23
GO:0032774	RNA biosynthetic process	23/539	23/18682	2.41512e-36	1.59408e-35	5.17045e-36	PANSSCG00000563/PANSSCG00000985/PANSSCG00001248/PANSSCG00001670/PANSSCG00001885/PANSSCG00001906/PANSSCG00001926/PANSSCG00002095/PANSSCG00002436/PANSSCG00003567/PANSSCG00004143/PANSSCG00004170/PANSSCG00004205/PANSSCG00004386/PANSSCG00004489/PANSSCG00004596/PANSSCG00004729/PANSSCG00004732/PANSSCG00005093/PANSSCG00005582/PANSSCG00005734/PANSSCG00005866/PANSSCG00006134	23
GO:0033267	obsolete axon part	23/539	23/18682	2.41512e-36	1.59408e-35	5.17045e-36	PANSSCG00001654/PANSSCG00001867/PANSSCG00001983/PANSSCG00001999/PANSSCG00002111/PANSSCG00002633/PANSSCG00003088/PANSSCG00003119/PANSSCG00003585/PANSSCG00003633/PANSSCG00003895/PANSSCG00004333/PANSSCG00004676/PANSSCG00004697/PANSSCG00005030/PANSSCG00005492/PANSSCG00005522/PANSSCG00005621/PANSSCG00005664/PANSSCG00005675/PANSSCG00005913/PANSSCG00006137/PANSSCG00006623	23
GO:0034762	regulation of transmembrane transport	23/539	23/18682	2.41512e-36	1.59408e-35	5.17045e-36	PANSSCG00001706/PANSSCG00001867/PANSSCG00001965/PANSSCG00002111/PANSSCG00002470/PANSSCG00002548/PANSSCG00002559/PANSSCG00002954/PANSSCG00003415/PANSSCG00003497/PANSSCG00003807/PANSSCG00004006/PANSSCG00004264/PANSSCG00004676/PANSSCG00004841/PANSSCG00005023/PANSSCG00005108/PANSSCG00005654/PANSSCG00005667/PANSSCG00005948/PANSSCG00006037/PANSSCG00006172/PANSSCG00006376	23
GO:0044087	regulation of cellular component biogenesis	23/539	23/18682	2.41512e-36	1.59408e-35	5.17045e-36	PANSSCG00001694/PANSSCG00001983/PANSSCG00002062/PANSSCG00002111/PANSSCG00002540/PANSSCG00003025/PANSSCG00003181/PANSSCG00003537/PANSSCG00003925/PANSSCG00004504/PANSSCG00004676/PANSSCG00004697/PANSSCG00004732/PANSSCG00004961/PANSSCG00004997/PANSSCG00005362/PANSSCG00005457/PANSSCG00005675/PANSSCG00005858/PANSSCG00006091/PANSSCG00006265/PANSSCG00006529/PANSSCG00006581	23
GO:0045936	negative regulation of phosphate metabolic process	23/539	23/18682	2.41512e-36	1.59408e-35	5.17045e-36	PANSSCG00002111/PANSSCG00002171/PANSSCG00002273/PANSSCG00002559/PANSSCG00002954/PANSSCG00003223/PANSSCG00003567/PANSSCG00003633/PANSSCG00004006/PANSSCG00004966/PANSSCG00005023/PANSSCG00005255/PANSSCG00005505/PANSSCG00005868/PANSSCG00005875/PANSSCG00006037/PANSSCG00006113/PANSSCG00006205/PANSSCG00006206/PANSSCG00006225/PANSSCG00006362/PANSSCG00006516/PANSSCG00006529	23
GO:0097659	nucleic acid-templated transcription	23/539	23/18682	2.41512e-36	1.59408e-35	5.17045e-36	PANSSCG00000563/PANSSCG00000985/PANSSCG00001248/PANSSCG00001670/PANSSCG00001885/PANSSCG00001906/PANSSCG00001926/PANSSCG00002095/PANSSCG00002436/PANSSCG00003567/PANSSCG00004143/PANSSCG00004170/PANSSCG00004205/PANSSCG00004386/PANSSCG00004489/PANSSCG00004596/PANSSCG00004729/PANSSCG00004732/PANSSCG00005093/PANSSCG00005582/PANSSCG00005734/PANSSCG00005866/PANSSCG00006134	23
GO:0051276	chromosome organization	32/539	53/18682	3.87131e-36	2.54984e-35	8.2705e-36	PANSSCG00001484/PANSSCG00001485/PANSSCG00001634/PANSSCG00001654/PANSSCG00001679/PANSSCG00001884/PANSSCG00002105/PANSSCG00002108/PANSSCG00002171/PANSSCG00002515/PANSSCG00002552/PANSSCG00002593/PANSSCG00003567/PANSSCG00003576/PANSSCG00003630/PANSSCG00004041/PANSSCG00004294/PANSSCG00005007/PANSSCG00005028/PANSSCG00005109/PANSSCG00005187/PANSSCG00005393/PANSSCG00005522/PANSSCG00005651/PANSSCG00005720…	32
GO:0042981	regulation of apoptotic process	50/539	173/18682	4.18592e-36	2.75125e-35	8.92377e-36	PANSSCG00000880/PANSSCG00001619/PANSSCG00001654/PANSSCG00001675/PANSSCG00001741/PANSSCG00001800/PANSSCG00001884/PANSSCG00001936/PANSSCG00001963/PANSSCG00001965/PANSSCG00001971/PANSSCG00002044/PANSSCG00002056/PANSSCG00002092/PANSSCG00002111/PANSSCG00002552/PANSSCG00002697/PANSSCG00002744/PANSSCG00002971/PANSSCG00003025/PANSSCG00003119/PANSSCG00003181/PANSSCG00003223/PANSSCG00003324/PANSSCG00003363…	50
GO:0043549	regulation of kinase activity	26/539	31/18682	7.54586e-36	4.94919e-35	1.60529e-35	PANSSCG00000880/PANSSCG00001654/PANSSCG00001741/PANSSCG00001887/PANSSCG00002056/PANSSCG00002111/PANSSCG00002548/PANSSCG00002552/PANSSCG00002561/PANSSCG00002971/PANSSCG00003181/PANSSCG00003753/PANSSCG00003882/PANSSCG00003980/PANSSCG00004676/PANSSCG00004966/PANSSCG00005023/PANSSCG00005255/PANSSCG00005667/PANSSCG00005675/PANSSCG00005868/PANSSCG00005948/PANSSCG00006184/PANSSCG00006205/PANSSCG00006529…	26
GO:0043069	negative regulation of programmed cell death	28/539	38/18682	1.38589e-35	9.07078e-35	2.94214e-35	PANSSCG00000880/PANSSCG00001654/PANSSCG00001675/PANSSCG00001884/PANSSCG00001963/PANSSCG00002044/PANSSCG00002056/PANSSCG00002111/PANSSCG00002552/PANSSCG00002744/PANSSCG00003324/PANSSCG00003363/PANSSCG00003497/PANSSCG00004263/PANSSCG00004455/PANSSCG00004519/PANSSCG00004597/PANSSCG00004638/PANSSCG00004676/PANSSCG00004732/PANSSCG00005023/PANSSCG00005093/PANSSCG00005108/PANSSCG00005496/PANSSCG00005675…	28
GO:0002520	immune system development	24/539	26/18682	2.0571e-35	1.34077e-34	4.34883e-35	PANSSCG00001197/PANSSCG00001248/PANSSCG00001741/PANSSCG00001800/PANSSCG00001867/PANSSCG00002111/PANSSCG00002296/PANSSCG00002470/PANSSCG00002971/PANSSCG00003497/PANSSCG00003622/PANSSCG00003851/PANSSCG00003980/PANSSCG00004467/PANSSCG00004597/PANSSCG00004638/PANSSCG00004676/PANSSCG00005093/PANSSCG00005720/PANSSCG00006035/PANSSCG00006266/PANSSCG00006353/PANSSCG00006466/PANSSCG00006494	24
GO:0051051	negative regulation of transport	24/539	26/18682	2.0571e-35	1.34077e-34	4.34883e-35	PANSSCG00000143/PANSSCG00000880/PANSSCG00001549/PANSSCG00001706/PANSSCG00001707/PANSSCG00001741/PANSSCG00001885/PANSSCG00001887/PANSSCG00001913/PANSSCG00002092/PANSSCG00002548/PANSSCG00003025/PANSSCG00003851/PANSSCG00004264/PANSSCG00004676/PANSSCG00004697/PANSSCG00004997/PANSSCG00005215/PANSSCG00005277/PANSSCG00005534/PANSSCG00005557/PANSSCG00005654/PANSSCG00005913/PANSSCG00006529	24
GO:0042127	regulation of cell population proliferation	49/539	170/18682	2.46109e-35	1.60073e-34	5.19204e-35	PANSSCG00001549/PANSSCG00001582/PANSSCG00001583/PANSSCG00001634/PANSSCG00001674/PANSSCG00001675/PANSSCG00001741/PANSSCG00001750/PANSSCG00001840/PANSSCG00002056/PANSSCG00002092/PANSSCG00002108/PANSSCG00002111/PANSSCG00002139/PANSSCG00002548/PANSSCG00002971/PANSSCG00003001/PANSSCG00003025/PANSSCG00003092/PANSSCG00003119/PANSSCG00003181/PANSSCG00003324/PANSSCG00003415/PANSSCG00003753/PANSSCG00003882…	49
GO:0071407	cellular response to organic cyclic compound	34/539	66/18682	4.69739e-35	3.04891e-34	9.88924e-35	PANSSCG00000880/PANSSCG00001549/PANSSCG00001617/PANSSCG00001654/PANSSCG00001674/PANSSCG00001679/PANSSCG00001999/PANSSCG00002111/PANSSCG00002407/PANSSCG00002548/PANSSCG00003088/PANSSCG00003309/PANSSCG00003376/PANSSCG00003638/PANSSCG00003787/PANSSCG00003912/PANSSCG00003947/PANSSCG00004006/PANSSCG00004039/PANSSCG00004216/PANSSCG00004220/PANSSCG00004455/PANSSCG00004563/PANSSCG00004841/PANSSCG00004861…	34
GO:0006575	cellular modified amino acid metabolic process	23/539	24/18682	5.64267e-35	3.65486e-34	1.18547e-34	PANSSCG00001656/PANSSCG00001945/PANSSCG00001999/PANSSCG00002697/PANSSCG00002771/PANSSCG00003088/PANSSCG00003277/PANSSCG00003376/PANSSCG00003947/PANSSCG00004039/PANSSCG00004264/PANSSCG00004496/PANSSCG00004563/PANSSCG00004891/PANSSCG00005277/PANSSCG00005654/PANSSCG00005775/PANSSCG00005810/PANSSCG00005830/PANSSCG00006035/PANSSCG00006266/PANSSCG00006456/PANSSCG00006598	23
GO:0032989	cellular component morphogenesis	22/539	22/18682	8.71684e-35	5.61113e-34	1.81999e-34	PANSSCG00001582/PANSSCG00001583/PANSSCG00001637/PANSSCG00001654/PANSSCG00001731/PANSSCG00001800/PANSSCG00001936/PANSSCG00002111/PANSSCG00002971/PANSSCG00003031/PANSSCG00003463/PANSSCG00003585/PANSSCG00003686/PANSSCG00003980/PANSSCG00003986/PANSSCG00004593/PANSSCG00004597/PANSSCG00004736/PANSSCG00004997/PANSSCG00005093/PANSSCG00005675/PANSSCG00006137	22
GO:0034660	ncRNA metabolic process	22/539	22/18682	8.71684e-35	5.61113e-34	1.81999e-34	PANSSCG00000985/PANSSCG00001023/PANSSCG00001425/PANSSCG00001625/PANSSCG00001641/PANSSCG00001655/PANSSCG00001670/PANSSCG00001677/PANSSCG00001679/PANSSCG00001886/PANSSCG00002095/PANSSCG00002436/PANSSCG00002579/PANSSCG00002618/PANSSCG00002957/PANSSCG00003547/PANSSCG00003613/PANSSCG00004663/PANSSCG00005362/PANSSCG00006192/PANSSCG00006255/PANSSCG00006540	22
GO:1901654	response to ketone	22/539	22/18682	8.71684e-35	5.61113e-34	1.81999e-34	PANSSCG00001549/PANSSCG00001674/PANSSCG00001885/PANSSCG00001999/PANSSCG00002470/PANSSCG00002517/PANSSCG00002833/PANSSCG00003069/PANSSCG00003088/PANSSCG00003376/PANSSCG00003753/PANSSCG00003882/PANSSCG00004039/PANSSCG00004220/PANSSCG00004263/PANSSCG00004563/PANSSCG00004638/PANSSCG00004697/PANSSCG00005923/PANSSCG00005939/PANSSCG00006456/PANSSCG00006518	22
GO:0090150	establishment of protein localization to membrane	26/539	33/18682	1.79809e-34	1.15507e-33	3.74651e-34	PANSSCG00000950/PANSSCG00000970/PANSSCG00000999/PANSSCG00001217/PANSSCG00001425/PANSSCG00001578/PANSSCG00001619/PANSSCG00001625/PANSSCG00001629/PANSSCG00001649/PANSSCG00001650/PANSSCG00001655/PANSSCG00002151/PANSSCG00002552/PANSSCG00002918/PANSSCG00003005/PANSSCG00003181/PANSSCG00003223/PANSSCG00003454/PANSSCG00003947/PANSSCG00004519/PANSSCG00004685/PANSSCG00004688/PANSSCG00006243/PANSSCG00006255…	26
GO:0007600	sensory perception	23/539	25/18682	6.86641e-34	4.38383e-33	1.42191e-33	PANSSCG00000880/PANSSCG00001549/PANSSCG00001706/PANSSCG00001887/PANSSCG00001999/PANSSCG00003031/PANSSCG00003088/PANSSCG00003633/PANSSCG00003726/PANSSCG00004044/PANSSCG00004052/PANSSCG00004081/PANSSCG00004111/PANSSCG00004194/PANSSCG00004736/PANSSCG00004765/PANSSCG00004903/PANSSCG00005030/PANSSCG00005667/PANSSCG00005731/PANSSCG00005899/PANSSCG00005954/PANSSCG00006013	23
GO:0046395	carboxylic acid catabolic process	23/539	25/18682	6.86641e-34	4.38383e-33	1.42191e-33	PANSSCG00001631/PANSSCG00002043/PANSSCG00002272/PANSSCG00002833/PANSSCG00002908/PANSSCG00003832/PANSSCG00004031/PANSSCG00004517/PANSSCG00004527/PANSSCG00004891/PANSSCG00005084/PANSSCG00005186/PANSSCG00005319/PANSSCG00005452/PANSSCG00005480/PANSSCG00005492/PANSSCG00005667/PANSSCG00005810/PANSSCG00005823/PANSSCG00006077/PANSSCG00006097/PANSSCG00006346/PANSSCG00006438	23
GO:1901137	carbohydrate derivative biosynthetic process	23/539	25/18682	6.86641e-34	4.38383e-33	1.42191e-33	PANSSCG00000613/PANSSCG00001247/PANSSCG00001645/PANSSCG00001768/PANSSCG00001974/PANSSCG00002053/PANSSCG00002394/PANSSCG00002419/PANSSCG00002561/PANSSCG00003068/PANSSCG00003156/PANSSCG00003192/PANSSCG00003339/PANSSCG00003380/PANSSCG00003582/PANSSCG00004131/PANSSCG00004220/PANSSCG00004517/PANSSCG00004519/PANSSCG00005414/PANSSCG00005667/PANSSCG00005813/PANSSCG00006103	23
GO:0006091	generation of precursor metabolites and energy	26/539	34/18682	7.43951e-34	4.74003e-33	1.53745e-33	PANSSCG00001179/PANSSCG00001247/PANSSCG00001549/PANSSCG00001645/PANSSCG00001714/PANSSCG00001747/PANSSCG00001796/PANSSCG00001963/PANSSCG00001974/PANSSCG00002242/PANSSCG00002394/PANSSCG00002517/PANSSCG00002561/PANSSCG00002771/PANSSCG00003068/PANSSCG00003069/PANSSCG00003223/PANSSCG00003339/PANSSCG00003380/PANSSCG00003528/PANSSCG00004263/PANSSCG00005108/PANSSCG00005661/PANSSCG00005895/PANSSCG00006103…	26
GO:0015711	organic anion transport	25/539	31/18682	1.15538e-33	7.3315e-33	2.378e-33	PANSSCG00000871/PANSSCG00000915/PANSSCG00001023/PANSSCG00001678/PANSSCG00001694/PANSSCG00001969/PANSSCG00002034/PANSSCG00002116/PANSSCG00002282/PANSSCG00003278/PANSSCG00003644/PANSSCG00003907/PANSSCG00003947/PANSSCG00004111/PANSSCG00004588/PANSSCG00004663/PANSSCG00005108/PANSSCG00005166/PANSSCG00005557/PANSSCG00005991/PANSSCG00006172/PANSSCG00006192/PANSSCG00006266/PANSSCG00006278/PANSSCG00006518	25
GO:0048729	tissue morphogenesis	25/539	31/18682	1.15538e-33	7.3315e-33	2.378e-33	PANSSCG00001637/PANSSCG00002062/PANSSCG00002111/PANSSCG00002132/PANSSCG00002548/PANSSCG00002971/PANSSCG00003119/PANSSCG00003309/PANSSCG00003441/PANSSCG00003463/PANSSCG00003980/PANSSCG00004143/PANSSCG00004205/PANSSCG00004489/PANSSCG00004638/PANSSCG00004644/PANSSCG00004732/PANSSCG00005093/PANSSCG00005415/PANSSCG00005555/PANSSCG00005629/PANSSCG00005884/PANSSCG00006075/PANSSCG00006087/PANSSCG00006651	25
GO:0018193	peptidyl-amino acid modification	24/539	28/18682	1.2282e-33	7.77779e-33	2.52275e-33	PANSSCG00001639/PANSSCG00001641/PANSSCG00002048/PANSSCG00002111/PANSSCG00002296/PANSSCG00002536/PANSSCG00002579/PANSSCG00002697/PANSSCG00002971/PANSSCG00003567/PANSSCG00003980/PANSSCG00004182/PANSSCG00004294/PANSSCG00004333/PANSSCG00004676/PANSSCG00005621/PANSSCG00005664/PANSSCG00005720/PANSSCG00005872/PANSSCG00006103/PANSSCG00006206/PANSSCG00006236/PANSSCG00006598/PANSSCG00006625	24
GO:0072359	circulatory system development	27/539	38/18682	1.25112e-33	7.89088e-33	2.55943e-33	PANSSCG00001197/PANSSCG00001672/PANSSCG00001674/PANSSCG00002111/PANSSCG00002132/PANSSCG00002548/PANSSCG00002971/PANSSCG00003309/PANSSCG00003980/PANSSCG00004143/PANSSCG00004205/PANSSCG00004220/PANSSCG00004489/PANSSCG00004638/PANSSCG00004644/PANSSCG00004676/PANSSCG00004697/PANSSCG00004732/PANSSCG00005093/PANSSCG00005108/PANSSCG00005370/PANSSCG00005415/PANSSCG00005629/PANSSCG00005884/PANSSCG00005923…	27
GO:0005996	monosaccharide metabolic process	22/539	23/18682	1.95174e-33	1.21867e-32	3.95279e-33	PANSSCG00000871/PANSSCG00000915/PANSSCG00001631/PANSSCG00001645/PANSSCG00001974/PANSSCG00002034/PANSSCG00002325/PANSSCG00002354/PANSSCG00002394/PANSSCG00002407/PANSSCG00002561/PANSSCG00003068/PANSSCG00003841/PANSSCG00004264/PANSSCG00004517/PANSSCG00005023/PANSSCG00005081/PANSSCG00005651/PANSSCG00005654/PANSSCG00005991/PANSSCG00006103/PANSSCG00006383	22
GO:0031960	response to corticosteroid	22/539	23/18682	1.95174e-33	1.21867e-32	3.95279e-33	PANSSCG00000880/PANSSCG00001631/PANSSCG00001679/PANSSCG00001999/PANSSCG00002394/PANSSCG00002470/PANSSCG00003088/PANSSCG00003638/PANSSCG00003753/PANSSCG00003882/PANSSCG00003912/PANSSCG00004039/PANSSCG00004216/PANSSCG00004532/PANSSCG00004697/PANSSCG00004861/PANSSCG00005758/PANSSCG00005878/PANSSCG00005939/PANSSCG00006239/PANSSCG00006456/PANSSCG00006518	22
GO:0042737	drug catabolic process	22/539	23/18682	1.95174e-33	1.21867e-32	3.95279e-33	PANSSCG00001007/PANSSCG00001631/PANSSCG00001945/PANSSCG00001963/PANSSCG00002044/PANSSCG00002214/PANSSCG00002517/PANSSCG00002578/PANSSCG00003069/PANSSCG00003681/PANSSCG00004532/PANSSCG00004903/PANSSCG00004914/PANSSCG00005064/PANSSCG00005084/PANSSCG00005277/PANSSCG00005319/PANSSCG00005871/PANSSCG00006077/PANSSCG00006266/PANSSCG00006420/PANSSCG00006518	22
GO:0051222	positive regulation of protein transport	22/539	23/18682	1.95174e-33	1.21867e-32	3.95279e-33	PANSSCG00001654/PANSSCG00001706/PANSSCG00001741/PANSSCG00002111/PANSSCG00002325/PANSSCG00002561/PANSSCG00003001/PANSSCG00003068/PANSSCG00003638/PANSSCG00003753/PANSSCG00003882/PANSSCG00003895/PANSSCG00004519/PANSSCG00005077/PANSSCG00005093/PANSSCG00005492/PANSSCG00005539/PANSSCG00005667/PANSSCG00005875/PANSSCG00005919/PANSSCG00006103/PANSSCG00006529	22
GO:0097305	response to alcohol	22/539	23/18682	1.95174e-33	1.21867e-32	3.95279e-33	PANSSCG00001549/PANSSCG00001674/PANSSCG00001849/PANSSCG00001963/PANSSCG00001999/PANSSCG00002105/PANSSCG00002517/PANSSCG00003069/PANSSCG00003088/PANSSCG00003407/PANSSCG00003576/PANSSCG00003955/PANSSCG00004220/PANSSCG00004638/PANSSCG00004676/PANSSCG00004697/PANSSCG00004903/PANSSCG00005028/PANSSCG00005137/PANSSCG00005758/PANSSCG00005939/PANSSCG00006518	22
GO:0031329	regulation of cellular catabolic process	21/539	21/18682	3.14025e-33	1.94521e-32	6.30936e-33	PANSSCG00001654/PANSSCG00001678/PANSSCG00001885/PANSSCG00001977/PANSSCG00002111/PANSSCG00002552/PANSSCG00002561/PANSSCG00003223/PANSSCG00004333/PANSSCG00004676/PANSSCG00005023/PANSSCG00005505/PANSSCG00005522/PANSSCG00005557/PANSSCG00005621/PANSSCG00005664/PANSSCG00005675/PANSSCG00005720/PANSSCG00005758/PANSSCG00005875/PANSSCG00006529	21
GO:0044427	obsolete chromosomal part	21/539	21/18682	3.14025e-33	1.94521e-32	6.30936e-33	PANSSCG00001634/PANSSCG00001641/PANSSCG00002105/PANSSCG00002171/PANSSCG00002544/PANSSCG00002579/PANSSCG00003320/PANSSCG00003576/PANSSCG00003630/PANSSCG00003681/PANSSCG00003760/PANSSCG00005028/PANSSCG00005109/PANSSCG00005187/PANSSCG00005393/PANSSCG00005522/PANSSCG00005720/PANSSCG00005778/PANSSCG00006362/PANSSCG00006532/PANSSCG00006594	21
GO:0098662	inorganic cation transmembrane transport	25/539	32/18682	5.14181e-33	3.17876e-32	1.03104e-32	PANSSCG00001247/PANSSCG00001617/PANSSCG00001706/PANSSCG00001707/PANSSCG00001916/PANSSCG00002548/PANSSCG00002883/PANSSCG00003031/PANSSCG00003339/PANSSCG00003380/PANSSCG00003497/PANSSCG00003655/PANSSCG00003895/PANSSCG00003899/PANSSCG00003907/PANSSCG00004324/PANSSCG00004841/PANSSCG00004903/PANSSCG00005030/PANSSCG00005215/PANSSCG00005311/PANSSCG00005347/PANSSCG00005534/PANSSCG00005607/PANSSCG00005661	25
GO:0016310	phosphorylation	37/539	95/18682	2.12248e-32	1.30956e-31	4.2476e-32	PANSSCG00001247/PANSSCG00001645/PANSSCG00001741/PANSSCG00001936/PANSSCG00001974/PANSSCG00002048/PANSSCG00002108/PANSSCG00002111/PANSSCG00002242/PANSSCG00002394/PANSSCG00002407/PANSSCG00002436/PANSSCG00002552/PANSSCG00002561/PANSSCG00002971/PANSSCG00003068/PANSSCG00003223/PANSSCG00003339/PANSSCG00003380/PANSSCG00003475/PANSSCG00003633/PANSSCG00003851/PANSSCG00003980/PANSSCG00004079/PANSSCG00004333…	37
GO:0048534	hematopoietic or lymphoid organ development	22/539	24/18682	2.28002e-32	1.40399e-31	4.55389e-32	PANSSCG00001197/PANSSCG00001248/PANSSCG00001800/PANSSCG00001867/PANSSCG00002111/PANSSCG00002296/PANSSCG00002971/PANSSCG00003497/PANSSCG00003622/PANSSCG00003851/PANSSCG00003980/PANSSCG00004467/PANSSCG00004597/PANSSCG00004638/PANSSCG00004676/PANSSCG00005093/PANSSCG00005720/PANSSCG00006035/PANSSCG00006266/PANSSCG00006353/PANSSCG00006466/PANSSCG00006494	22
GO:0009617	response to bacterium	41/539	126/18682	4.28401e-32	2.63281e-31	8.53962e-32	PANSSCG00000880/PANSSCG00001629/PANSSCG00001650/PANSSCG00001675/PANSSCG00001694/PANSSCG00001741/PANSSCG00001810/PANSSCG00002044/PANSSCG00002056/PANSSCG00002092/PANSSCG00002111/PANSSCG00002407/PANSSCG00002470/PANSSCG00003001/PANSSCG00003132/PANSSCG00003376/PANSSCG00003497/PANSSCG00003593/PANSSCG00003638/PANSSCG00003753/PANSSCG00003807/PANSSCG00003851/PANSSCG00003882/PANSSCG00003912/PANSSCG00003925…	41
GO:0006066	alcohol metabolic process	21/539	22/18682	6.7255e-32	4.109e-31	1.33277e-31	PANSSCG00001694/PANSSCG00001885/PANSSCG00001963/PANSSCG00002407/PANSSCG00002517/PANSSCG00003069/PANSSCG00003475/PANSSCG00003497/PANSSCG00003582/PANSSCG00004263/PANSSCG00004517/PANSSCG00004532/PANSSCG00004861/PANSSCG00005016/PANSSCG00005081/PANSSCG00005084/PANSSCG00005452/PANSSCG00005480/PANSSCG00005823/PANSSCG00006438/PANSSCG00006518	21
GO:0010720	positive regulation of cell development	21/539	22/18682	6.7255e-32	4.109e-31	1.33277e-31	PANSSCG00001674/PANSSCG00001983/PANSSCG00002111/PANSSCG00002132/PANSSCG00002571/PANSSCG00004333/PANSSCG00004372/PANSSCG00004455/PANSSCG00004644/PANSSCG00004676/PANSSCG00004700/PANSSCG00004997/PANSSCG00005093/PANSSCG00005108/PANSSCG00005621/PANSSCG00005664/PANSSCG00005923/PANSSCG00006206/PANSSCG00006225/PANSSCG00006356/PANSSCG00006623	21
GO:0033218	amide binding	21/539	22/18682	6.7255e-32	4.109e-31	1.33277e-31	PANSSCG00001617/PANSSCG00001639/PANSSCG00001654/PANSSCG00001678/PANSSCG00001714/PANSSCG00001796/PANSSCG00001977/PANSSCG00002536/PANSSCG00002771/PANSSCG00003376/PANSSCG00003753/PANSSCG00003882/PANSSCG00003947/PANSSCG00004563/PANSSCG00005137/PANSSCG00005237/PANSSCG00005347/PANSSCG00005667/PANSSCG00005675/PANSSCG00005923/PANSSCG00006383	21
GO:0008219	cell death	29/539	51/18682	9.08959e-32	5.54252e-31	1.79774e-31	PANSSCG00001645/PANSSCG00001811/PANSSCG00001971/PANSSCG00001972/PANSSCG00002056/PANSSCG00002092/PANSSCG00002105/PANSSCG00002111/PANSSCG00002883/PANSSCG00002971/PANSSCG00003223/PANSSCG00003324/PANSSCG00003537/PANSSCG00003576/PANSSCG00003980/PANSSCG00004597/PANSSCG00004676/PANSSCG00004966/PANSSCG00005028/PANSSCG00005093/PANSSCG00005108/PANSSCG00005555/PANSSCG00005675/PANSSCG00005868/PANSSCG00005884…	29
GO:0002791	regulation of peptide secretion	20/539	20/18682	1.12916e-31	6.85843e-31	2.22456e-31	PANSSCG00000143/PANSSCG00001549/PANSSCG00001741/PANSSCG00001885/PANSSCG00002092/PANSSCG00002111/PANSSCG00002325/PANSSCG00002561/PANSSCG00003001/PANSSCG00003068/PANSSCG00003638/PANSSCG00003753/PANSSCG00003882/PANSSCG00003895/PANSSCG00004220/PANSSCG00004519/PANSSCG00005077/PANSSCG00005108/PANSSCG00005492/PANSSCG00006103	20
GO:0070647	protein modification by small protein conjugation or removal	20/539	20/18682	1.12916e-31	6.85843e-31	2.22456e-31	PANSSCG00001248/PANSSCG00002515/PANSSCG00002552/PANSSCG00002926/PANSSCG00003025/PANSSCG00003233/PANSSCG00003320/PANSSCG00003972/PANSSCG00004041/PANSSCG00004700/PANSSCG00005007/PANSSCG00005009/PANSSCG00005237/PANSSCG00005505/PANSSCG00005522/PANSSCG00005837/PANSSCG00005884/PANSSCG00005917/PANSSCG00006236/PANSSCG00006529	20
GO:0001817	regulation of cytokine production	28/539	47/18682	1.606e-31	9.73579e-31	3.15784e-31	PANSSCG00000143/PANSSCG00000144/PANSSCG00000145/PANSSCG00001654/PANSSCG00001741/PANSSCG00001977/PANSSCG00002092/PANSSCG00002111/PANSSCG00002470/PANSSCG00002926/PANSSCG00003001/PANSSCG00003025/PANSSCG00003181/PANSSCG00003497/PANSSCG00003638/PANSSCG00003753/PANSSCG00003882/PANSSCG00003895/PANSSCG00003972/PANSSCG00004006/PANSSCG00004538/PANSSCG00005077/PANSSCG00005675/PANSSCG00005837/PANSSCG00005948…	28
GO:0048870	cell motility	27/539	43/18682	2.41104e-31	1.45877e-30	4.73157e-31	PANSSCG00001670/PANSSCG00001818/PANSSCG00001916/PANSSCG00001947/PANSSCG00002056/PANSSCG00002062/PANSSCG00002111/PANSSCG00002132/PANSSCG00002555/PANSSCG00003223/PANSSCG00003249/PANSSCG00003278/PANSSCG00003441/PANSSCG00003553/PANSSCG00004006/PANSSCG00004517/PANSSCG00004519/PANSSCG00004638/PANSSCG00004644/PANSSCG00004676/PANSSCG00004961/PANSSCG00005093/PANSSCG00005317/PANSSCG00005858/PANSSCG00005872…	27
GO:0006613	cotranslational protein targeting to membrane	21/539	23/18682	7.52939e-31	4.54676e-30	1.47476e-30	PANSSCG00000950/PANSSCG00000970/PANSSCG00000999/PANSSCG00001217/PANSSCG00001425/PANSSCG00001578/PANSSCG00001625/PANSSCG00001629/PANSSCG00001649/PANSSCG00001650/PANSSCG00001655/PANSSCG00002151/PANSSCG00002552/PANSSCG00002918/PANSSCG00003005/PANSSCG00003181/PANSSCG00003454/PANSSCG00004688/PANSSCG00006243/PANSSCG00006255/PANSSCG00006540	21
GO:0006520	cellular amino acid metabolic process	28/539	49/18682	8.52398e-31	5.13743e-30	1.66634e-30	PANSSCG00001023/PANSSCG00001631/PANSSCG00001677/PANSSCG00001999/PANSSCG00002043/PANSSCG00002053/PANSSCG00002272/PANSSCG00002697/PANSSCG00002771/PANSSCG00002888/PANSSCG00003088/PANSSCG00004031/PANSSCG00004039/PANSSCG00004663/PANSSCG00004891/PANSSCG00004914/PANSSCG00005016/PANSSCG00005084/PANSSCG00005277/PANSSCG00005319/PANSSCG00005492/PANSSCG00005810/PANSSCG00006077/PANSSCG00006097/PANSSCG00006192…	28
GO:1904951	positive regulation of establishment of protein localization	23/539	29/18682	9.76472e-31	5.87388e-30	1.90521e-30	PANSSCG00001654/PANSSCG00001706/PANSSCG00001741/PANSSCG00002111/PANSSCG00002325/PANSSCG00002561/PANSSCG00003001/PANSSCG00003068/PANSSCG00003638/PANSSCG00003753/PANSSCG00003882/PANSSCG00003895/PANSSCG00004519/PANSSCG00005077/PANSSCG00005093/PANSSCG00005492/PANSSCG00005539/PANSSCG00005667/PANSSCG00005875/PANSSCG00005919/PANSSCG00006103/PANSSCG00006297/PANSSCG00006529	23
GO:0035239	tube morphogenesis	22/539	26/18682	1.17042e-30	7.00009e-30	2.2705e-30	PANSSCG00001672/PANSSCG00002111/PANSSCG00002132/PANSSCG00002548/PANSSCG00002971/PANSSCG00003119/PANSSCG00003441/PANSSCG00003980/PANSSCG00004143/PANSSCG00004205/PANSSCG00004489/PANSSCG00004638/PANSSCG00004644/PANSSCG00004676/PANSSCG00004732/PANSSCG00005093/PANSSCG00005370/PANSSCG00005415/PANSSCG00005629/PANSSCG00006075/PANSSCG00006091/PANSSCG00006651	22
GO:0046486	glycerolipid metabolic process	22/539	26/18682	1.17042e-30	7.00009e-30	2.2705e-30	PANSSCG00000613/PANSSCG00001179/PANSSCG00001656/PANSSCG00001672/PANSSCG00001942/PANSSCG00001963/PANSSCG00002407/PANSSCG00002559/PANSSCG00002578/PANSSCG00002954/PANSSCG00003092/PANSSCG00003497/PANSSCG00003553/PANSSCG00003582/PANSSCG00003955/PANSSCG00005064/PANSSCG00005081/PANSSCG00005480/PANSSCG00005813/PANSSCG00005823/PANSSCG00005871/PANSSCG00006037	22
GO:0071375	cellular response to peptide hormone stimulus	22/539	26/18682	1.17042e-30	7.00009e-30	2.2705e-30	PANSSCG00001023/PANSSCG00001549/PANSSCG00001714/PANSSCG00001796/PANSSCG00001885/PANSSCG00001999/PANSSCG00002394/PANSSCG00002407/PANSSCG00003088/PANSSCG00003309/PANSSCG00003638/PANSSCG00003925/PANSSCG00004039/PANSSCG00004663/PANSSCG00004732/PANSSCG00005081/PANSSCG00005255/PANSSCG00005913/PANSSCG00006192/PANSSCG00006265/PANSSCG00006456/PANSSCG00006518	22
GO:0048646	anatomical structure formation involved in morphogenesis	27/539	45/18682	1.47858e-30	8.82623e-30	2.86282e-30	PANSSCG00001549/PANSSCG00001637/PANSSCG00001672/PANSSCG00001674/PANSSCG00001731/PANSSCG00001800/PANSSCG00001936/PANSSCG00002111/PANSSCG00002132/PANSSCG00002971/PANSSCG00003031/PANSSCG00003076/PANSSCG00003585/PANSSCG00003980/PANSSCG00003986/PANSSCG00004143/PANSSCG00004205/PANSSCG00004489/PANSSCG00004597/PANSSCG00004638/PANSSCG00004644/PANSSCG00004676/PANSSCG00004732/PANSSCG00004841/PANSSCG00005093…	27
GO:0072599	establishment of protein localization to endoplasmic reticulum	20/539	21/18682	2.30843e-30	1.37275e-29	4.45255e-30	PANSSCG00000950/PANSSCG00000970/PANSSCG00000999/PANSSCG00001217/PANSSCG00001425/PANSSCG00001578/PANSSCG00001625/PANSSCG00001629/PANSSCG00001649/PANSSCG00001650/PANSSCG00001655/PANSSCG00002552/PANSSCG00002918/PANSSCG00003005/PANSSCG00003181/PANSSCG00003454/PANSSCG00003947/PANSSCG00006243/PANSSCG00006255/PANSSCG00006540	20
GO:0120035	regulation of plasma membrane bounded cell projection organization	20/539	21/18682	2.30843e-30	1.37275e-29	4.45255e-30	PANSSCG00001674/PANSSCG00001983/PANSSCG00002062/PANSSCG00002111/PANSSCG00002132/PANSSCG00002540/PANSSCG00002571/PANSSCG00003025/PANSSCG00003119/PANSSCG00003895/PANSSCG00004455/PANSSCG00004644/PANSSCG00004676/PANSSCG00004700/PANSSCG00004961/PANSSCG00004997/PANSSCG00005457/PANSSCG00005858/PANSSCG00005872/PANSSCG00006623	20
GO:0006259	DNA metabolic process	25/539	37/18682	2.4744e-30	1.46586e-29	4.75457e-30	PANSSCG00001549/PANSSCG00001641/PANSSCG00001654/PANSSCG00001679/PANSSCG00002105/PANSSCG00002111/PANSSCG00002515/PANSSCG00002536/PANSSCG00002552/PANSSCG00002579/PANSSCG00002593/PANSSCG00002926/PANSSCG00003181/PANSSCG00003320/PANSSCG00003576/PANSSCG00003972/PANSSCG00004333/PANSSCG00005028/PANSSCG00005393/PANSSCG00005621/PANSSCG00005664/PANSSCG00005778/PANSSCG00005837/PANSSCG00006213/PANSSCG00006216	25
GO:0019216	regulation of lipid metabolic process	25/539	37/18682	2.4744e-30	1.46586e-29	4.75457e-30	PANSSCG00001179/PANSSCG00001678/PANSSCG00001679/PANSSCG00001694/PANSSCG00001885/PANSSCG00002092/PANSSCG00002354/PANSSCG00002470/PANSSCG00002833/PANSSCG00003807/PANSSCG00003912/PANSSCG00004216/PANSSCG00004676/PANSSCG00005023/PANSSCG00005480/PANSSCG00005557/PANSSCG00005609/PANSSCG00005823/PANSSCG00005878/PANSSCG00005948/PANSSCG00006239/PANSSCG00006376/PANSSCG00006383/PANSSCG00006518/PANSSCG00006529	25
GO:0002697	regulation of immune effector process	19/539	19/18682	4.0526e-30	2.37377e-29	7.69941e-30	PANSSCG00000740/PANSSCG00001636/PANSSCG00001741/PANSSCG00001818/PANSSCG00001917/PANSSCG00002360/PANSSCG00002470/PANSSCG00002907/PANSSCG00003025/PANSSCG00003132/PANSSCG00003553/PANSSCG00003851/PANSSCG00005151/PANSSCG00005601/PANSSCG00005675/PANSSCG00005939/PANSSCG00005948/PANSSCG00006000/PANSSCG00006658	19
GO:0010959	regulation of metal ion transport	19/539	19/18682	4.0526e-30	2.37377e-29	7.69941e-30	PANSSCG00001549/PANSSCG00001706/PANSSCG00001867/PANSSCG00001965/PANSSCG00002111/PANSSCG00002548/PANSSCG00002559/PANSSCG00002954/PANSSCG00003031/PANSSCG00003497/PANSSCG00004006/PANSSCG00004264/PANSSCG00004676/PANSSCG00004841/PANSSCG00005023/PANSSCG00005654/PANSSCG00005667/PANSSCG00005948/PANSSCG00006037	19
GO:0022402	cell cycle process	19/539	19/18682	4.0526e-30	2.37377e-29	7.69941e-30	PANSSCG00001679/PANSSCG00001887/PANSSCG00002111/PANSSCG00002171/PANSSCG00002548/PANSSCG00003025/PANSSCG00003181/PANSSCG00003957/PANSSCG00004333/PANSSCG00004597/PANSSCG00004700/PANSSCG00005393/PANSSCG00005621/PANSSCG00005664/PANSSCG00005778/PANSSCG00006172/PANSSCG00006279/PANSSCG00006362/PANSSCG00006594	19
GO:0022610	biological adhesion	19/539	19/18682	4.0526e-30	2.37377e-29	7.69941e-30	PANSSCG00001549/PANSSCG00001625/PANSSCG00001654/PANSSCG00001655/PANSSCG00001675/PANSSCG00001741/PANSSCG00001800/PANSSCG00001818/PANSSCG00002025/PANSSCG00002111/PANSSCG00002273/PANSSCG00003076/PANSSCG00003585/PANSSCG00004141/PANSSCG00004519/PANSSCG00004538/PANSSCG00004676/PANSSCG00006137/PANSSCG00006466	19
GO:0050865	regulation of cell activation	19/539	19/18682	4.0526e-30	2.37377e-29	7.69941e-30	PANSSCG00001179/PANSSCG00001248/PANSSCG00001634/PANSSCG00001741/PANSSCG00001818/PANSSCG00002048/PANSSCG00002092/PANSSCG00002111/PANSSCG00002296/PANSSCG00003181/PANSSCG00003537/PANSSCG00003553/PANSSCG00003753/PANSSCG00003851/PANSSCG00003882/PANSSCG00005093/PANSSCG00005948/PANSSCG00006216/PANSSCG00006466	19
GO:0051129	negative regulation of cellular component organization	19/539	19/18682	4.0526e-30	2.37377e-29	7.69941e-30	PANSSCG00000145/PANSSCG00001663/PANSSCG00001884/PANSSCG00001887/PANSSCG00001913/PANSSCG00001965/PANSSCG00001983/PANSSCG00002062/PANSSCG00002108/PANSSCG00003025/PANSSCG00003119/PANSSCG00003537/PANSSCG00003895/PANSSCG00004455/PANSSCG00004997/PANSSCG00005557/PANSSCG00005675/PANSSCG00006494/PANSSCG00006529	19
GO:0002237	response to molecule of bacterial origin	23/539	30/18682	4.07397e-30	2.38182e-29	7.72553e-30	PANSSCG00000880/PANSSCG00001694/PANSSCG00001741/PANSSCG00001810/PANSSCG00002056/PANSSCG00002092/PANSSCG00002111/PANSSCG00002407/PANSSCG00003132/PANSSCG00003497/PANSSCG00003638/PANSSCG00003851/PANSSCG00003912/PANSSCG00004006/PANSSCG00004039/PANSSCG00004216/PANSSCG00004263/PANSSCG00005081/PANSSCG00005277/PANSSCG00005758/PANSSCG00005878/PANSSCG00006239/PANSSCG00006456	23
GO:0034220	ion transmembrane transport	38/539	115/18682	4.16765e-30	2.43204e-29	7.8884e-30	PANSSCG00000871/PANSSCG00000915/PANSSCG00001247/PANSSCG00001617/PANSSCG00001694/PANSSCG00001706/PANSSCG00001707/PANSSCG00001916/PANSSCG00002034/PANSSCG00002282/PANSSCG00002548/PANSSCG00002883/PANSSCG00003031/PANSSCG00003278/PANSSCG00003339/PANSSCG00003380/PANSSCG00003497/PANSSCG00003644/PANSSCG00003655/PANSSCG00003895/PANSSCG00003899/PANSSCG00003907/PANSSCG00004324/PANSSCG00004588/PANSSCG00004841…	38
GO:0002576	platelet degranulation	21/539	24/18682	5.86391e-30	3.41551e-29	1.10783e-29	PANSSCG00001678/PANSSCG00001800/PANSSCG00001965/PANSSCG00002383/PANSSCG00003638/PANSSCG00003693/PANSSCG00003768/PANSSCG00003807/PANSSCG00003912/PANSSCG00004216/PANSSCG00004627/PANSSCG00004891/PANSSCG00005255/PANSSCG00005409/PANSSCG00005675/PANSSCG00005810/PANSSCG00005878/PANSSCG00005939/PANSSCG00006091/PANSSCG00006239/PANSSCG00006376	21
GO:0016772	transferase activity, transferring phosphorus-containing groups	24/539	34/18682	6.69514e-30	3.89241e-29	1.26252e-29	PANSSCG00000613/PANSSCG00001936/PANSSCG00001974/PANSSCG00002048/PANSSCG00002111/PANSSCG00002407/PANSSCG00002436/PANSSCG00002561/PANSSCG00002971/PANSSCG00003068/PANSSCG00003475/PANSSCG00003633/PANSSCG00003841/PANSSCG00003980/PANSSCG00004079/PANSSCG00004333/PANSSCG00004638/PANSSCG00004676/PANSSCG00005081/PANSSCG00005621/PANSSCG00005651/PANSSCG00005664/PANSSCG00005872/PANSSCG00006075	24
GO:0005198	structural molecule activity	41/539	143/18682	1.29948e-29	7.54084e-29	2.4459e-29	PANSSCG00000950/PANSSCG00000970/PANSSCG00000999/PANSSCG00001217/PANSSCG00001425/PANSSCG00001578/PANSSCG00001625/PANSSCG00001637/PANSSCG00001649/PANSSCG00001655/PANSSCG00001659/PANSSCG00001811/PANSSCG00001936/PANSSCG00002552/PANSSCG00002617/PANSSCG00002918/PANSSCG00003005/PANSSCG00003181/PANSSCG00003363/PANSSCG00003407/PANSSCG00003454/PANSSCG00003463/PANSSCG00003768/PANSSCG00003957/PANSSCG00003986…	41
GO:0022626	cytosolic ribosome	30/539	64/18682	1.87176e-29	1.08416e-28	3.51651e-29	PANSSCG00000950/PANSSCG00000999/PANSSCG00001217/PANSSCG00001425/PANSSCG00001578/PANSSCG00001625/PANSSCG00001629/PANSSCG00001649/PANSSCG00001650/PANSSCG00001655/PANSSCG00001659/PANSSCG00001886/PANSSCG00002552/PANSSCG00002617/PANSSCG00002618/PANSSCG00002918/PANSSCG00003005/PANSSCG00003102/PANSSCG00003181/PANSSCG00003407/PANSSCG00003454/PANSSCG00003613/PANSSCG00005499/PANSSCG00005785/PANSSCG00006024…	30
GO:0005102	signaling receptor binding	50/539	233/18682	2.28195e-29	1.31931e-28	4.27922e-29	PANSSCG00000142/PANSSCG00000143/PANSSCG00000144/PANSSCG00000145/PANSSCG00000880/PANSSCG00001549/PANSSCG00001617/PANSSCG00001654/PANSSCG00001678/PANSSCG00001679/PANSSCG00001694/PANSSCG00001741/PANSSCG00001800/PANSSCG00001818/PANSSCG00001913/PANSSCG00001963/PANSSCG00001965/PANSSCG00002111/PANSSCG00002470/PANSSCG00002548/PANSSCG00002697/PANSSCG00003031/PANSSCG00003249/PANSSCG00003298/PANSSCG00003633…	50
GO:0022890	inorganic cation transmembrane transporter activity	20/539	22/18682	2.47202e-29	1.41608e-28	4.59311e-29	PANSSCG00001617/PANSSCG00001706/PANSSCG00001707/PANSSCG00001916/PANSSCG00002548/PANSSCG00002883/PANSSCG00003031/PANSSCG00003655/PANSSCG00003895/PANSSCG00003899/PANSSCG00003907/PANSSCG00004841/PANSSCG00004903/PANSSCG00005030/PANSSCG00005215/PANSSCG00005311/PANSSCG00005347/PANSSCG00005534/PANSSCG00005607/PANSSCG00005661	20
GO:0031344	regulation of cell projection organization	20/539	22/18682	2.47202e-29	1.41608e-28	4.59311e-29	PANSSCG00001674/PANSSCG00001983/PANSSCG00002062/PANSSCG00002111/PANSSCG00002132/PANSSCG00002540/PANSSCG00002571/PANSSCG00003025/PANSSCG00003119/PANSSCG00003895/PANSSCG00004455/PANSSCG00004644/PANSSCG00004676/PANSSCG00004700/PANSSCG00004961/PANSSCG00004997/PANSSCG00005457/PANSSCG00005858/PANSSCG00005872/PANSSCG00006623	20
GO:0050878	regulation of body fluid levels	20/539	22/18682	2.47202e-29	1.41608e-28	4.59311e-29	PANSSCG00001549/PANSSCG00001818/PANSSCG00002296/PANSSCG00002470/PANSSCG00002833/PANSSCG00003031/PANSSCG00003475/PANSSCG00003497/PANSSCG00003895/PANSSCG00004597/PANSSCG00004697/PANSSCG00004729/PANSSCG00004903/PANSSCG00005452/PANSSCG00005939/PANSSCG00005948/PANSSCG00006091/PANSSCG00006266/PANSSCG00006356/PANSSCG00006438	20
GO:0051606	detection of stimulus	20/539	22/18682	2.47202e-29	1.41608e-28	4.59311e-29	PANSSCG00001706/PANSSCG00001887/PANSSCG00002548/PANSSCG00002552/PANSSCG00003031/PANSSCG00003132/PANSSCG00003181/PANSSCG00003726/PANSSCG00003753/PANSSCG00003882/PANSSCG00004081/PANSSCG00004111/PANSSCG00004194/PANSSCG00004449/PANSSCG00004765/PANSSCG00005393/PANSSCG00005899/PANSSCG00005954/PANSSCG00006013/PANSSCG00006516	20
GO:0051640	organelle localization	20/539	22/18682	2.47202e-29	1.41608e-28	4.59311e-29	PANSSCG00001679/PANSSCG00001965/PANSSCG00002171/PANSSCG00002296/PANSSCG00002540/PANSSCG00002701/PANSSCG00002883/PANSSCG00003119/PANSSCG00003957/PANSSCG00004333/PANSSCG00004720/PANSSCG00004736/PANSSCG00005457/PANSSCG00005574/PANSSCG00005621/PANSSCG00005664/PANSSCG00005872/PANSSCG00006279/PANSSCG00006362/PANSSCG00006623	20
GO:0006612	protein targeting to membrane	22/539	28/18682	2.7952e-29	1.59828e-28	5.18407e-29	PANSSCG00000950/PANSSCG00000970/PANSSCG00000999/PANSSCG00001217/PANSSCG00001425/PANSSCG00001578/PANSSCG00001625/PANSSCG00001629/PANSSCG00001649/PANSSCG00001650/PANSSCG00001655/PANSSCG00002151/PANSSCG00002552/PANSSCG00002918/PANSSCG00003005/PANSSCG00003181/PANSSCG00003454/PANSSCG00003947/PANSSCG00004688/PANSSCG00006243/PANSSCG00006255/PANSSCG00006540	22
GO:0006820	anion transport	26/539	44/18682	3.22545e-29	1.84092e-28	5.97109e-29	PANSSCG00000871/PANSSCG00000915/PANSSCG00001023/PANSSCG00001678/PANSSCG00001694/PANSSCG00001969/PANSSCG00002034/PANSSCG00002116/PANSSCG00002282/PANSSCG00003278/PANSSCG00003644/PANSSCG00003907/PANSSCG00003947/PANSSCG00004111/PANSSCG00004588/PANSSCG00004663/PANSSCG00005108/PANSSCG00005166/PANSSCG00005311/PANSSCG00005557/PANSSCG00005991/PANSSCG00006172/PANSSCG00006192/PANSSCG00006266/PANSSCG00006278…	26
GO:1903827	regulation of cellular protein localization	24/539	36/18682	6.05659e-29	3.45049e-28	1.11918e-28	PANSSCG00001654/PANSSCG00001706/PANSSCG00001867/PANSSCG00001885/PANSSCG00001913/PANSSCG00001983/PANSSCG00002559/PANSSCG00002954/PANSSCG00003025/PANSSCG00003537/PANSSCG00004333/PANSSCG00005093/PANSSCG00005539/PANSSCG00005621/PANSSCG00005664/PANSSCG00005667/PANSSCG00005875/PANSSCG00005913/PANSSCG00005919/PANSSCG00005948/PANSSCG00006037/PANSSCG00006206/PANSSCG00006297/PANSSCG00006529	24
GO:0098655	cation transmembrane transport	26/539	45/18682	7.43688e-29	4.22913e-28	1.37173e-28	PANSSCG00001247/PANSSCG00001617/PANSSCG00001706/PANSSCG00001707/PANSSCG00001916/PANSSCG00002548/PANSSCG00002883/PANSSCG00003031/PANSSCG00003339/PANSSCG00003380/PANSSCG00003497/PANSSCG00003655/PANSSCG00003895/PANSSCG00003899/PANSSCG00003907/PANSSCG00004324/PANSSCG00004588/PANSSCG00004841/PANSSCG00004903/PANSSCG00005030/PANSSCG00005215/PANSSCG00005311/PANSSCG00005347/PANSSCG00005534/PANSSCG00005607…	26
GO:0014074	response to purine-containing compound	19/539	20/18682	7.89065e-29	4.46279e-28	1.44752e-28	PANSSCG00001885/PANSSCG00002394/PANSSCG00002407/PANSSCG00002548/PANSSCG00003497/PANSSCG00003912/PANSSCG00004006/PANSSCG00004039/PANSSCG00004216/PANSSCG00004676/PANSSCG00004697/PANSSCG00004841/PANSSCG00004903/PANSSCG00005081/PANSSCG00005151/PANSSCG00005878/PANSSCG00006184/PANSSCG00006239/PANSSCG00006456	19
GO:0040017	positive regulation of locomotion	19/539	20/18682	7.89065e-29	4.46279e-28	1.44752e-28	PANSSCG00001582/PANSSCG00001583/PANSSCG00001674/PANSSCG00001741/PANSSCG00001965/PANSSCG00002111/PANSSCG00003553/PANSSCG00003807/PANSSCG00003895/PANSSCG00004006/PANSSCG00004676/PANSSCG00004700/PANSSCG00004732/PANSSCG00005496/PANSSCG00005667/PANSSCG00005923/PANSSCG00006376/PANSSCG00006383/PANSSCG00006529	19
GO:0150034	distal axon	19/539	20/18682	7.89065e-29	4.46279e-28	1.44752e-28	PANSSCG00001654/PANSSCG00001867/PANSSCG00001983/PANSSCG00001999/PANSSCG00002111/PANSSCG00002633/PANSSCG00003088/PANSSCG00003119/PANSSCG00003895/PANSSCG00004333/PANSSCG00004676/PANSSCG00004697/PANSSCG00005492/PANSSCG00005522/PANSSCG00005621/PANSSCG00005664/PANSSCG00005675/PANSSCG00006137/PANSSCG00006623	19
GO:0009123	nucleoside monophosphate metabolic process	18/539	18/18682	1.45178e-28	8.07924e-28	2.62053e-28	PANSSCG00001247/PANSSCG00001645/PANSSCG00001731/PANSSCG00001974/PANSSCG00002053/PANSSCG00002242/PANSSCG00002394/PANSSCG00002561/PANSSCG00003068/PANSSCG00003223/PANSSCG00003309/PANSSCG00003339/PANSSCG00003380/PANSSCG00003633/PANSSCG00005651/PANSSCG00005661/PANSSCG00005895/PANSSCG00006103	18
GO:0009126	purine nucleoside monophosphate metabolic process	18/539	18/18682	1.45178e-28	8.07924e-28	2.62053e-28	PANSSCG00001247/PANSSCG00001645/PANSSCG00001731/PANSSCG00001974/PANSSCG00002053/PANSSCG00002242/PANSSCG00002394/PANSSCG00002561/PANSSCG00003068/PANSSCG00003223/PANSSCG00003309/PANSSCG00003339/PANSSCG00003380/PANSSCG00003633/PANSSCG00005651/PANSSCG00005661/PANSSCG00005895/PANSSCG00006103	18
GO:0009161	ribonucleoside monophosphate metabolic process	18/539	18/18682	1.45178e-28	8.07924e-28	2.62053e-28	PANSSCG00001247/PANSSCG00001645/PANSSCG00001731/PANSSCG00001974/PANSSCG00002053/PANSSCG00002242/PANSSCG00002394/PANSSCG00002561/PANSSCG00003068/PANSSCG00003223/PANSSCG00003309/PANSSCG00003339/PANSSCG00003380/PANSSCG00003633/PANSSCG00005651/PANSSCG00005661/PANSSCG00005895/PANSSCG00006103	18
GO:0009167	purine ribonucleoside monophosphate metabolic process	18/539	18/18682	1.45178e-28	8.07924e-28	2.62053e-28	PANSSCG00001247/PANSSCG00001645/PANSSCG00001731/PANSSCG00001974/PANSSCG00002053/PANSSCG00002242/PANSSCG00002394/PANSSCG00002561/PANSSCG00003068/PANSSCG00003223/PANSSCG00003309/PANSSCG00003339/PANSSCG00003380/PANSSCG00003633/PANSSCG00005651/PANSSCG00005661/PANSSCG00005895/PANSSCG00006103	18
GO:0034248	regulation of cellular amide metabolic process	18/539	18/18682	1.45178e-28	8.07924e-28	2.62053e-28	PANSSCG00001023/PANSSCG00003181/PANSSCG00003324/PANSSCG00004333/PANSSCG00004597/PANSSCG00004663/PANSSCG00004676/PANSSCG00005621/PANSSCG00005664/PANSSCG00005675/PANSSCG00005785/PANSSCG00005923/PANSSCG00006103/PANSSCG00006184/PANSSCG00006192/PANSSCG00006266/PANSSCG00006529/PANSSCG00006540	18
GO:0043177	organic acid binding	18/539	18/18682	1.45178e-28	8.07924e-28	2.62053e-28	PANSSCG00001179/PANSSCG00001631/PANSSCG00001677/PANSSCG00001678/PANSSCG00002354/PANSSCG00002407/PANSSCG00002771/PANSSCG00002888/PANSSCG00003025/PANSSCG00003947/PANSSCG00004031/PANSSCG00004455/PANSSCG00005081/PANSSCG00005084/PANSSCG00005492/PANSSCG00005667/PANSSCG00006383/PANSSCG00006518	18
GO:0043900	regulation of multi-organism process	18/539	18/18682	1.45178e-28	8.07924e-28	2.62053e-28	PANSSCG00001639/PANSSCG00001641/PANSSCG00001741/PANSSCG00002044/PANSSCG00002536/PANSSCG00002579/PANSSCG00002697/PANSSCG00003001/PANSSCG00003025/PANSSCG00003537/PANSSCG00003753/PANSSCG00003841/PANSSCG00003882/PANSSCG00004697/PANSSCG00005923/PANSSCG00006103/PANSSCG00006383/PANSSCG00006598	18
GO:0072507	divalent inorganic cation homeostasis	18/539	18/18682	1.45178e-28	8.07924e-28	2.62053e-28	PANSSCG00001549/PANSSCG00001706/PANSSCG00002111/PANSSCG00002548/PANSSCG00002883/PANSSCG00003031/PANSSCG00003324/PANSSCG00003497/PANSSCG00003895/PANSSCG00004220/PANSSCG00004264/PANSSCG00004676/PANSSCG00004697/PANSSCG00005023/PANSSCG00005654/PANSSCG00005667/PANSSCG00005923/PANSSCG00005948	18
GO:1901605	alpha-amino acid metabolic process	18/539	18/18682	1.45178e-28	8.07924e-28	2.62053e-28	PANSSCG00001631/PANSSCG00001999/PANSSCG00002043/PANSSCG00002053/PANSSCG00002697/PANSSCG00002771/PANSSCG00002888/PANSSCG00003088/PANSSCG00004031/PANSSCG00004039/PANSSCG00004914/PANSSCG00005084/PANSSCG00005277/PANSSCG00005319/PANSSCG00005492/PANSSCG00006077/PANSSCG00006456/PANSSCG00006598	18
GO:0006790	sulfur compound metabolic process	23/539	33/18682	1.70889e-28	9.49318e-28	3.07915e-28	PANSSCG00001179/PANSSCG00001945/PANSSCG00001999/PANSSCG00002272/PANSSCG00002419/PANSSCG00002771/PANSSCG00003088/PANSSCG00003277/PANSSCG00003376/PANSSCG00004264/PANSSCG00004563/PANSSCG00004891/PANSSCG00005277/PANSSCG00005480/PANSSCG00005629/PANSSCG00005654/PANSSCG00005810/PANSSCG00005823/PANSSCG00005830/PANSSCG00006217/PANSSCG00006266/PANSSCG00006353/PANSSCG00006383	23
GO:0043270	positive regulation of ion transport	20/539	23/18682	1.84502e-28	1.02312e-27	3.31851e-28	PANSSCG00001549/PANSSCG00001706/PANSSCG00001965/PANSSCG00002111/PANSSCG00002548/PANSSCG00002559/PANSSCG00002833/PANSSCG00002954/PANSSCG00003031/PANSSCG00003415/PANSSCG00003497/PANSSCG00004264/PANSSCG00004697/PANSSCG00005023/PANSSCG00005108/PANSSCG00005654/PANSSCG00005667/PANSSCG00005948/PANSSCG00006037/PANSSCG00006172	20
GO:0098797	plasma membrane protein complex	22/539	30/18682	4.11542e-28	2.27807e-27	7.38901e-28	PANSSCG00001549/PANSSCG00001617/PANSSCG00001706/PANSSCG00001849/PANSSCG00001867/PANSSCG00001916/PANSSCG00003655/PANSSCG00003753/PANSSCG00003882/PANSSCG00004006/PANSSCG00004467/PANSSCG00004598/PANSSCG00004638/PANSSCG00004676/PANSSCG00004841/PANSSCG00004903/PANSSCG00005030/PANSSCG00005347/PANSSCG00005700/PANSSCG00005899/PANSSCG00006013/PANSSCG00006590	22
GO:0046677	response to antibiotic	23/539	34/18682	5.14205e-28	2.84132e-27	9.21593e-28	PANSSCG00001197/PANSSCG00001663/PANSSCG00001963/PANSSCG00001971/PANSSCG00001999/PANSSCG00002105/PANSSCG00002111/PANSSCG00002517/PANSSCG00003069/PANSSCG00003088/PANSSCG00003181/PANSSCG00003407/PANSSCG00003553/PANSSCG00003576/PANSSCG00003955/PANSSCG00004220/PANSSCG00004676/PANSSCG00004903/PANSSCG00005028/PANSSCG00005137/PANSSCG00005758/PANSSCG00006266/PANSSCG00006518	23
GO:0080135	regulation of cellular response to stress	21/539	27/18682	7.91218e-28	4.36428e-27	1.41557e-27	PANSSCG00000880/PANSSCG00001654/PANSSCG00001675/PANSSCG00001678/PANSSCG00002111/PANSSCG00002273/PANSSCG00002697/PANSSCG00002744/PANSSCG00003181/PANSSCG00003223/PANSSCG00003681/PANSSCG00003895/PANSSCG00004031/PANSSCG00004597/PANSSCG00004676/PANSSCG00005023/PANSSCG00005675/PANSSCG00006091/PANSSCG00006266/PANSSCG00006529/PANSSCG00006598	21
GO:0043009	chordate embryonic development	19/539	21/18682	8.06588e-28	4.4334e-27	1.43799e-27	PANSSCG00001549/PANSSCG00001942/PANSSCG00002111/PANSSCG00002132/PANSSCG00002548/PANSSCG00002971/PANSSCG00003475/PANSSCG00003807/PANSSCG00003980/PANSSCG00004143/PANSSCG00004205/PANSSCG00004489/PANSSCG00004542/PANSSCG00004638/PANSSCG00004732/PANSSCG00005093/PANSSCG00005311/PANSSCG00005496/PANSSCG00006376	19
GO:1904062	regulation of cation transmembrane transport	19/539	21/18682	8.06588e-28	4.4334e-27	1.43799e-27	PANSSCG00001706/PANSSCG00001867/PANSSCG00001965/PANSSCG00002111/PANSSCG00002548/PANSSCG00002559/PANSSCG00002954/PANSSCG00003415/PANSSCG00003497/PANSSCG00004006/PANSSCG00004264/PANSSCG00004676/PANSSCG00004841/PANSSCG00005023/PANSSCG00005108/PANSSCG00005654/PANSSCG00005667/PANSSCG00005948/PANSSCG00006037	19
GO:0070972	protein localization to endoplasmic reticulum	20/539	24/18682	1.07769e-27	5.90272e-27	1.91457e-27	PANSSCG00000950/PANSSCG00000970/PANSSCG00000999/PANSSCG00001217/PANSSCG00001425/PANSSCG00001578/PANSSCG00001625/PANSSCG00001629/PANSSCG00001649/PANSSCG00001650/PANSSCG00001655/PANSSCG00002552/PANSSCG00002918/PANSSCG00003005/PANSSCG00003181/PANSSCG00003454/PANSSCG00003947/PANSSCG00006243/PANSSCG00006255/PANSSCG00006540	20
GO:1990234	transferase complex	20/539	24/18682	1.07769e-27	5.90272e-27	1.91457e-27	PANSSCG00000985/PANSSCG00001730/PANSSCG00002095/PANSSCG00002771/PANSSCG00003068/PANSSCG00003173/PANSSCG00003233/PANSSCG00003582/PANSSCG00004041/PANSSCG00004294/PANSSCG00004700/PANSSCG00005404/PANSSCG00005522/PANSSCG00005720/PANSSCG00005813/PANSSCG00005884/PANSSCG00006097/PANSSCG00006236/PANSSCG00006494/PANSSCG00006496	20
GO:0019953	sexual reproduction	22/539	31/18682	1.37997e-27	7.53191e-27	2.443e-27	PANSSCG00001248/PANSSCG00001641/PANSSCG00001670/PANSSCG00001674/PANSSCG00001679/PANSSCG00001916/PANSSCG00001983/PANSSCG00002105/PANSSCG00002579/PANSSCG00003525/PANSSCG00003576/PANSSCG00003593/PANSSCG00004294/PANSSCG00004676/PANSSCG00004697/PANSSCG00004766/PANSSCG00005023/PANSSCG00005028/PANSSCG00005137/PANSSCG00005496/PANSSCG00005923/PANSSCG00006297	22
GO:0097435	supramolecular fiber organization	22/539	31/18682	1.37997e-27	7.53191e-27	2.443e-27	PANSSCG00001637/PANSSCG00001654/PANSSCG00001731/PANSSCG00001800/PANSSCG00001936/PANSSCG00001965/PANSSCG00001983/PANSSCG00002111/PANSSCG00002296/PANSSCG00003537/PANSSCG00003895/PANSSCG00003925/PANSSCG00003986/PANSSCG00004676/PANSSCG00004732/PANSSCG00005555/PANSSCG00005629/PANSSCG00006087/PANSSCG00006091/PANSSCG00006265/PANSSCG00006466/PANSSCG00006581	22
GO:0010876	lipid localization	18/539	19/18682	2.68543e-27	1.46061e-26	4.73755e-27	PANSSCG00001023/PANSSCG00001179/PANSSCG00001678/PANSSCG00001694/PANSSCG00001849/PANSSCG00002116/PANSSCG00002759/PANSSCG00004111/PANSSCG00004663/PANSSCG00005452/PANSSCG00005480/PANSSCG00005557/PANSSCG00005675/PANSSCG00005823/PANSSCG00006172/PANSSCG00006192/PANSSCG00006438/PANSSCG00006518	18
GO:0051047	positive regulation of secretion	18/539	19/18682	2.68543e-27	1.46061e-26	4.73755e-27	PANSSCG00001741/PANSSCG00001818/PANSSCG00002111/PANSSCG00002325/PANSSCG00002561/PANSSCG00002833/PANSSCG00003001/PANSSCG00003068/PANSSCG00003553/PANSSCG00003638/PANSSCG00003753/PANSSCG00003882/PANSSCG00003895/PANSSCG00004519/PANSSCG00004697/PANSSCG00005077/PANSSCG00005492/PANSSCG00006103	18
GO:0046914	transition metal ion binding	24/539	40/18682	2.73148e-27	1.48308e-26	4.81041e-27	PANSSCG00000563/PANSSCG00001023/PANSSCG00001768/PANSSCG00001840/PANSSCG00001942/PANSSCG00002111/PANSSCG00002407/PANSSCG00002517/PANSSCG00003069/PANSSCG00003415/PANSSCG00003808/PANSSCG00004517/PANSSCG00004532/PANSSCG00004663/PANSSCG00004995/PANSSCG00005023/PANSSCG00005081/PANSSCG00005084/PANSSCG00005492/PANSSCG00005758/PANSSCG00005923/PANSSCG00006013/PANSSCG00006192/PANSSCG00006217	24
GO:0043068	positive regulation of programmed cell death	21/539	28/18682	3.08102e-27	1.66995e-26	5.41656e-27	PANSSCG00001619/PANSSCG00001741/PANSSCG00001936/PANSSCG00002056/PANSSCG00002111/PANSSCG00002552/PANSSCG00002971/PANSSCG00003025/PANSSCG00003119/PANSSCG00003181/PANSSCG00003223/PANSSCG00003324/PANSSCG00003537/PANSSCG00003980/PANSSCG00004079/PANSSCG00004685/PANSSCG00005675/PANSSCG00006103/PANSSCG00006206/PANSSCG00006518/PANSSCG00006529	21
GO:0003013	circulatory system process	17/539	17/18682	5.19108e-27	2.75622e-26	8.93989e-27	PANSSCG00001549/PANSSCG00001714/PANSSCG00001796/PANSSCG00002559/PANSSCG00002833/PANSSCG00002954/PANSSCG00003119/PANSSCG00003309/PANSSCG00003851/PANSSCG00003895/PANSSCG00004006/PANSSCG00004638/PANSSCG00004697/PANSSCG00004732/PANSSCG00005077/PANSSCG00006037/PANSSCG00006091	17
GO:0009141	nucleoside triphosphate metabolic process	17/539	17/18682	5.19108e-27	2.75622e-26	8.93989e-27	PANSSCG00001247/PANSSCG00001645/PANSSCG00001679/PANSSCG00001731/PANSSCG00001974/PANSSCG00002242/PANSSCG00002394/PANSSCG00002561/PANSSCG00003068/PANSSCG00003223/PANSSCG00003309/PANSSCG00003339/PANSSCG00003380/PANSSCG00005651/PANSSCG00005661/PANSSCG00005895/PANSSCG00006103	17
GO:0009144	purine nucleoside triphosphate metabolic process	17/539	17/18682	5.19108e-27	2.75622e-26	8.93989e-27	PANSSCG00001247/PANSSCG00001645/PANSSCG00001679/PANSSCG00001731/PANSSCG00001974/PANSSCG00002242/PANSSCG00002394/PANSSCG00002561/PANSSCG00003068/PANSSCG00003223/PANSSCG00003309/PANSSCG00003339/PANSSCG00003380/PANSSCG00005651/PANSSCG00005661/PANSSCG00005895/PANSSCG00006103	17
GO:0009199	ribonucleoside triphosphate metabolic process	17/539	17/18682	5.19108e-27	2.75622e-26	8.93989e-27	PANSSCG00001247/PANSSCG00001645/PANSSCG00001679/PANSSCG00001731/PANSSCG00001974/PANSSCG00002242/PANSSCG00002394/PANSSCG00002561/PANSSCG00003068/PANSSCG00003223/PANSSCG00003309/PANSSCG00003339/PANSSCG00003380/PANSSCG00005651/PANSSCG00005661/PANSSCG00005895/PANSSCG00006103	17
GO:0009205	purine ribonucleoside triphosphate metabolic process	17/539	17/18682	5.19108e-27	2.75622e-26	8.93989e-27	PANSSCG00001247/PANSSCG00001645/PANSSCG00001679/PANSSCG00001731/PANSSCG00001974/PANSSCG00002242/PANSSCG00002394/PANSSCG00002561/PANSSCG00003068/PANSSCG00003223/PANSSCG00003309/PANSSCG00003339/PANSSCG00003380/PANSSCG00005651/PANSSCG00005661/PANSSCG00005895/PANSSCG00006103	17
GO:0044212		17/539	17/18682	5.19108e-27	2.75622e-26	8.93989e-27	PANSSCG00000563/PANSSCG00001885/PANSSCG00001965/PANSSCG00002744/PANSSCG00003787/PANSSCG00004143/PANSSCG00004205/PANSSCG00004489/PANSSCG00004596/PANSSCG00004729/PANSSCG00004732/PANSSCG00005093/PANSSCG00005582/PANSSCG00005734/PANSSCG00005866/PANSSCG00006236/PANSSCG00006494	17
GO:0044449	obsolete contractile fiber part	17/539	17/18682	5.19108e-27	2.75622e-26	8.93989e-27	PANSSCG00001628/PANSSCG00001637/PANSSCG00001684/PANSSCG00001731/PANSSCG00001800/PANSSCG00001894/PANSSCG00001936/PANSSCG00001948/PANSSCG00001965/PANSSCG00002883/PANSSCG00002964/PANSSCG00003029/PANSSCG00003309/PANSSCG00003986/PANSSCG00004841/PANSSCG00005030/PANSSCG00005943	17
GO:0051962	positive regulation of nervous system development	17/539	17/18682	5.19108e-27	2.75622e-26	8.93989e-27	PANSSCG00001674/PANSSCG00001983/PANSSCG00002132/PANSSCG00002571/PANSSCG00004333/PANSSCG00004372/PANSSCG00004455/PANSSCG00004644/PANSSCG00004676/PANSSCG00004697/PANSSCG00004700/PANSSCG00004997/PANSSCG00005093/PANSSCG00005621/PANSSCG00005664/PANSSCG00006225/PANSSCG00006623	17
GO:0072503	cellular divalent inorganic cation homeostasis	17/539	17/18682	5.19108e-27	2.75622e-26	8.93989e-27	PANSSCG00001706/PANSSCG00002111/PANSSCG00002548/PANSSCG00002883/PANSSCG00003031/PANSSCG00003324/PANSSCG00003497/PANSSCG00003895/PANSSCG00004220/PANSSCG00004264/PANSSCG00004676/PANSSCG00004697/PANSSCG00005023/PANSSCG00005654/PANSSCG00005667/PANSSCG00005923/PANSSCG00005948	17
GO:0098589	membrane region	17/539	17/18682	5.19108e-27	2.75622e-26	8.93989e-27	PANSSCG00001549/PANSSCG00001694/PANSSCG00001818/PANSSCG00003031/PANSSCG00003324/PANSSCG00003553/PANSSCG00003957/PANSSCG00004220/PANSSCG00004467/PANSSCG00004676/PANSSCG00004903/PANSSCG00005108/PANSSCG00005331/PANSSCG00005452/PANSSCG00005563/PANSSCG00006279/PANSSCG00006438	17
GO:1903317	regulation of protein maturation	17/539	17/18682	5.19108e-27	2.75622e-26	8.93989e-27	PANSSCG00000740/PANSSCG00001636/PANSSCG00001917/PANSSCG00002360/PANSSCG00002470/PANSSCG00002907/PANSSCG00003025/PANSSCG00003119/PANSSCG00003132/PANSSCG00003537/PANSSCG00005151/PANSSCG00005601/PANSSCG00005675/PANSSCG00005939/PANSSCG00005948/PANSSCG00006000/PANSSCG00006091	17
GO:1903532	positive regulation of secretion by cell	17/539	17/18682	5.19108e-27	2.75622e-26	8.93989e-27	PANSSCG00001741/PANSSCG00001818/PANSSCG00002111/PANSSCG00002325/PANSSCG00002561/PANSSCG00003001/PANSSCG00003068/PANSSCG00003553/PANSSCG00003638/PANSSCG00003753/PANSSCG00003882/PANSSCG00003895/PANSSCG00004519/PANSSCG00004697/PANSSCG00005077/PANSSCG00005492/PANSSCG00006103	17
GO:0046683	response to organophosphorus	19/539	22/18682	5.75842e-27	3.05226e-26	9.9001e-27	PANSSCG00001885/PANSSCG00002394/PANSSCG00002407/PANSSCG00002548/PANSSCG00003497/PANSSCG00003912/PANSSCG00004006/PANSSCG00004039/PANSSCG00004216/PANSSCG00004676/PANSSCG00004697/PANSSCG00004903/PANSSCG00005081/PANSSCG00005151/PANSSCG00005878/PANSSCG00006184/PANSSCG00006239/PANSSCG00006456/PANSSCG00006518	19
GO:0007267	cell-cell signaling	27/539	57/18682	8.76231e-27	4.6366e-26	1.5039e-26	PANSSCG00000145/PANSSCG00000880/PANSSCG00001179/PANSSCG00001706/PANSSCG00001750/PANSSCG00001887/PANSSCG00002025/PANSSCG00002132/PANSSCG00002552/PANSSCG00002623/PANSSCG00003249/PANSSCG00003497/PANSSCG00003633/PANSSCG00003895/PANSSCG00003987/PANSSCG00004141/PANSSCG00004333/PANSSCG00004538/PANSSCG00004598/PANSSCG00004720/PANSSCG00004903/PANSSCG00005621/PANSSCG00005664/PANSSCG00006225/PANSSCG00006466…	27
GO:0007010	cytoskeleton organization	34/539	105/18682	1.0192e-26	5.38397e-26	1.74631e-26	PANSSCG00001550/PANSSCG00001637/PANSSCG00001679/PANSSCG00001731/PANSSCG00001800/PANSSCG00001936/PANSSCG00001965/PANSSCG00001983/PANSSCG00002111/PANSSCG00002132/PANSSCG00002548/PANSSCG00002893/PANSSCG00003181/PANSSCG00003537/PANSSCG00003553/PANSSCG00003768/PANSSCG00003851/PANSSCG00003895/PANSSCG00003925/PANSSCG00003957/PANSSCG00003986/PANSSCG00004676/PANSSCG00005415/PANSSCG00005555/PANSSCG00005629…	34
GO:0008092	cytoskeletal protein binding	30/539	76/18682	1.08204e-26	5.70631e-26	1.85086e-26	PANSSCG00001549/PANSSCG00001582/PANSSCG00001583/PANSSCG00001637/PANSSCG00001645/PANSSCG00001654/PANSSCG00001688/PANSSCG00001731/PANSSCG00001800/PANSSCG00001936/PANSSCG00001965/PANSSCG00001983/PANSSCG00002111/PANSSCG00002394/PANSSCG00002548/PANSSCG00002893/PANSSCG00003181/PANSSCG00003537/PANSSCG00003768/PANSSCG00003895/PANSSCG00004182/PANSSCG00004308/PANSSCG00004736/PANSSCG00004961/PANSSCG00005629…	30
GO:0050767	regulation of neurogenesis	25/539	47/18682	1.51479e-26	7.97502e-26	2.58672e-26	PANSSCG00001674/PANSSCG00001983/PANSSCG00002092/PANSSCG00002111/PANSSCG00002132/PANSSCG00002540/PANSSCG00002571/PANSSCG00003119/PANSSCG00003895/PANSSCG00004333/PANSSCG00004372/PANSSCG00004455/PANSSCG00004644/PANSSCG00004676/PANSSCG00004700/PANSSCG00004997/PANSSCG00005093/PANSSCG00005621/PANSSCG00005664/PANSSCG00005872/PANSSCG00005923/PANSSCG00005948/PANSSCG00006137/PANSSCG00006225/PANSSCG00006623	25
GO:0006886	intracellular protein transport	46/539	222/18682	2.15509e-26	1.13269e-25	3.67392e-26	PANSSCG00000950/PANSSCG00000970/PANSSCG00000999/PANSSCG00001217/PANSSCG00001425/PANSSCG00001578/PANSSCG00001619/PANSSCG00001625/PANSSCG00001629/PANSSCG00001642/PANSSCG00001649/PANSSCG00001650/PANSSCG00001655/PANSSCG00001657/PANSSCG00001679/PANSSCG00001906/PANSSCG00001926/PANSSCG00001963/PANSSCG00002151/PANSSCG00002296/PANSSCG00002552/PANSSCG00002918/PANSSCG00003005/PANSSCG00003181/PANSSCG00003298…	46
GO:0045047	protein targeting to ER	20/539	26/18682	2.21295e-26	1.16115e-25	3.76622e-26	PANSSCG00000950/PANSSCG00000970/PANSSCG00000999/PANSSCG00001217/PANSSCG00001425/PANSSCG00001578/PANSSCG00001625/PANSSCG00001629/PANSSCG00001649/PANSSCG00001650/PANSSCG00001655/PANSSCG00002552/PANSSCG00002918/PANSSCG00003005/PANSSCG00003181/PANSSCG00003454/PANSSCG00003947/PANSSCG00006243/PANSSCG00006255/PANSSCG00006540	20
GO:0031966	mitochondrial membrane	32/539	92/18682	2.43727e-26	1.2767e-25	4.14104e-26	PANSSCG00000871/PANSSCG00000915/PANSSCG00001247/PANSSCG00001619/PANSSCG00001659/PANSSCG00001747/PANSSCG00002242/PANSSCG00002552/PANSSCG00003181/PANSSCG00003223/PANSSCG00003339/PANSSCG00003380/PANSSCG00003441/PANSSCG00003528/PANSSCG00004039/PANSSCG00004308/PANSSCG00004685/PANSSCG00004690/PANSSCG00004760/PANSSCG00004995/PANSSCG00005108/PANSSCG00005237/PANSSCG00005305/PANSSCG00005380/PANSSCG00005539…	32
GO:0003012	muscle system process	18/539	20/18682	2.61442e-26	1.3672e-25	4.43457e-26	PANSSCG00001197/PANSSCG00001628/PANSSCG00001637/PANSSCG00001684/PANSSCG00001731/PANSSCG00001894/PANSSCG00001948/PANSSCG00002559/PANSSCG00002883/PANSSCG00002954/PANSSCG00003029/PANSSCG00003309/PANSSCG00003537/PANSSCG00003768/PANSSCG00004006/PANSSCG00004645/PANSSCG00004841/PANSSCG00006037	18
GO:0097237	cellular response to toxic substance	19/539	23/18682	3.22345e-26	1.68288e-25	5.45848e-26	PANSSCG00001663/PANSSCG00001945/PANSSCG00001963/PANSSCG00001971/PANSSCG00002044/PANSSCG00002105/PANSSCG00002111/PANSSCG00002578/PANSSCG00003181/PANSSCG00003376/PANSSCG00003576/PANSSCG00003681/PANSSCG00004264/PANSSCG00004563/PANSSCG00005028/PANSSCG00005064/PANSSCG00005654/PANSSCG00005871/PANSSCG00006035	19
GO:0005789	endoplasmic reticulum membrane	50/539	271/18682	3.75765e-26	1.9585e-25	6.35245e-26	PANSSCG00000613/PANSSCG00000950/PANSSCG00000999/PANSSCG00001007/PANSSCG00001179/PANSSCG00001217/PANSSCG00001425/PANSSCG00001625/PANSSCG00001655/PANSSCG00001656/PANSSCG00001672/PANSSCG00001694/PANSSCG00001864/PANSSCG00001885/PANSSCG00001969/PANSSCG00002034/PANSSCG00002151/PANSSCG00002214/PANSSCG00002354/PANSSCG00002394/PANSSCG00002419/PANSSCG00002548/PANSSCG00002552/PANSSCG00002833/PANSSCG00002883…	50
GO:0010942	positive regulation of cell death	25/539	49/18682	6.11683e-26	3.1775e-25	1.03063e-25	PANSSCG00001619/PANSSCG00001741/PANSSCG00001936/PANSSCG00002056/PANSSCG00002105/PANSSCG00002111/PANSSCG00002552/PANSSCG00002971/PANSSCG00003025/PANSSCG00003119/PANSSCG00003181/PANSSCG00003223/PANSSCG00003324/PANSSCG00003537/PANSSCG00003576/PANSSCG00003980/PANSSCG00004079/PANSSCG00004685/PANSSCG00005028/PANSSCG00005675/PANSSCG00006103/PANSSCG00006206/PANSSCG00006266/PANSSCG00006518/PANSSCG00006529	25
GO:0016788	hydrolase activity, acting on ester bonds	25/539	49/18682	6.11683e-26	3.1775e-25	1.03063e-25	PANSSCG00001549/PANSSCG00001622/PANSSCG00001672/PANSSCG00001731/PANSSCG00001942/PANSSCG00002162/PANSSCG00002561/PANSSCG00002578/PANSSCG00003092/PANSSCG00003181/PANSSCG00003192/PANSSCG00003475/PANSSCG00003497/PANSSCG00003553/PANSSCG00003662/PANSSCG00004006/PANSSCG00005023/PANSSCG00005064/PANSSCG00005213/PANSSCG00005452/PANSSCG00005480/PANSSCG00005823/PANSSCG00005871/PANSSCG00006438/PANSSCG00006554	25
GO:0006811	ion transport	52/539	299/18682	6.82949e-26	3.54181e-25	1.1488e-25	PANSSCG00000871/PANSSCG00000915/PANSSCG00001023/PANSSCG00001247/PANSSCG00001617/PANSSCG00001678/PANSSCG00001694/PANSSCG00001706/PANSSCG00001707/PANSSCG00001840/PANSSCG00001916/PANSSCG00001969/PANSSCG00002034/PANSSCG00002116/PANSSCG00002282/PANSSCG00002548/PANSSCG00002883/PANSSCG00003031/PANSSCG00003278/PANSSCG00003339/PANSSCG00003380/PANSSCG00003415/PANSSCG00003497/PANSSCG00003644/PANSSCG00003655…	52
GO:0051384	response to glucocorticoid	20/539	27/18682	8.3096e-26	4.29513e-25	1.39314e-25	PANSSCG00000880/PANSSCG00001631/PANSSCG00001999/PANSSCG00002394/PANSSCG00002470/PANSSCG00003088/PANSSCG00003638/PANSSCG00003753/PANSSCG00003882/PANSSCG00003912/PANSSCG00004039/PANSSCG00004216/PANSSCG00004532/PANSSCG00004697/PANSSCG00004861/PANSSCG00005758/PANSSCG00005878/PANSSCG00005939/PANSSCG00006239/PANSSCG00006456	20
GO:0052548	regulation of endopeptidase activity	20/539	27/18682	8.3096e-26	4.29513e-25	1.39314e-25	PANSSCG00001248/PANSSCG00001741/PANSSCG00002056/PANSSCG00002273/PANSSCG00002383/PANSSCG00002919/PANSSCG00003181/PANSSCG00003223/PANSSCG00003537/PANSSCG00003912/PANSSCG00004216/PANSSCG00004627/PANSSCG00005255/PANSSCG00005878/PANSSCG00005939/PANSSCG00006091/PANSSCG00006103/PANSSCG00006239/PANSSCG00006262/PANSSCG00006529	20
GO:0045859	regulation of protein kinase activity	22/539	35/18682	9.07618e-26	4.65595e-25	1.51017e-25	PANSSCG00000880/PANSSCG00001654/PANSSCG00001741/PANSSCG00001887/PANSSCG00002056/PANSSCG00002111/PANSSCG00002548/PANSSCG00002552/PANSSCG00002971/PANSSCG00003181/PANSSCG00003980/PANSSCG00004676/PANSSCG00004966/PANSSCG00005023/PANSSCG00005255/PANSSCG00005667/PANSSCG00005675/PANSSCG00005868/PANSSCG00006184/PANSSCG00006205/PANSSCG00006529/PANSSCG00006635	22
GO:0051259	protein complex oligomerization	22/539	35/18682	9.07618e-26	4.65595e-25	1.51017e-25	PANSSCG00001645/PANSSCG00001675/PANSSCG00001867/PANSSCG00001945/PANSSCG00001963/PANSSCG00001971/PANSSCG00002548/PANSSCG00002771/PANSSCG00003068/PANSSCG00003528/PANSSCG00003753/PANSSCG00003841/PANSSCG00003882/PANSSCG00004324/PANSSCG00004467/PANSSCG00004647/PANSSCG00005492/PANSSCG00005758/PANSSCG00005939/PANSSCG00006266/PANSSCG00006518/PANSSCG00006521	22
GO:0001067	regulatory region nucleic acid binding	17/539	18/18682	9.09714e-26	4.65595e-25	1.51017e-25	PANSSCG00000563/PANSSCG00001885/PANSSCG00001965/PANSSCG00002744/PANSSCG00003787/PANSSCG00004143/PANSSCG00004205/PANSSCG00004489/PANSSCG00004596/PANSSCG00004729/PANSSCG00004732/PANSSCG00005093/PANSSCG00005582/PANSSCG00005734/PANSSCG00005866/PANSSCG00006236/PANSSCG00006494	17
GO:0002757	immune response-activating signal transduction	17/539	18/18682	9.09714e-26	4.65595e-25	1.51017e-25	PANSSCG00001654/PANSSCG00001675/PANSSCG00001684/PANSSCG00001706/PANSSCG00001741/PANSSCG00002092/PANSSCG00002111/PANSSCG00002552/PANSSCG00003029/PANSSCG00003497/PANSSCG00003553/PANSSCG00003753/PANSSCG00003882/PANSSCG00004006/PANSSCG00004467/PANSSCG00004961/PANSSCG00005858	17
GO:0019866	organelle inner membrane	17/539	18/18682	9.09714e-26	4.65595e-25	1.51017e-25	PANSSCG00000871/PANSSCG00000915/PANSSCG00001247/PANSSCG00001659/PANSSCG00002242/PANSSCG00003181/PANSSCG00003339/PANSSCG00003380/PANSSCG00003528/PANSSCG00004690/PANSSCG00004760/PANSSCG00005108/PANSSCG00005380/PANSSCG00005661/PANSSCG00005895/PANSSCG00005991/PANSSCG00006278	17
GO:0060562	epithelial tube morphogenesis	17/539	18/18682	9.09714e-26	4.65595e-25	1.51017e-25	PANSSCG00002111/PANSSCG00002132/PANSSCG00002548/PANSSCG00002971/PANSSCG00003119/PANSSCG00003441/PANSSCG00003980/PANSSCG00004143/PANSSCG00004205/PANSSCG00004489/PANSSCG00004644/PANSSCG00004732/PANSSCG00005093/PANSSCG00005415/PANSSCG00005629/PANSSCG00006075/PANSSCG00006651	17
GO:0031669	cellular response to nutrient levels	19/539	24/18682	1.50631e-25	7.6967e-25	2.49645e-25	PANSSCG00001649/PANSSCG00001663/PANSSCG00001674/PANSSCG00001675/PANSSCG00001706/PANSSCG00001885/PANSSCG00002272/PANSSCG00002386/PANSSCG00002407/PANSSCG00002513/PANSSCG00003074/PANSSCG00003454/PANSSCG00003947/PANSSCG00004729/PANSSCG00005081/PANSSCG00005277/PANSSCG00005305/PANSSCG00005492/PANSSCG00006518	19
GO:0010638	positive regulation of organelle organization	18/539	21/18682	1.7817e-25	9.07415e-25	2.94323e-25	PANSSCG00001663/PANSSCG00001885/PANSSCG00002108/PANSSCG00002111/PANSSCG00003181/PANSSCG00003537/PANSSCG00003895/PANSSCG00003925/PANSSCG00004676/PANSSCG00005522/PANSSCG00005539/PANSSCG00005919/PANSSCG00006091/PANSSCG00006134/PANSSCG00006265/PANSSCG00006297/PANSSCG00006494/PANSSCG00006581	18
GO:0031406	carboxylic acid binding	18/539	21/18682	1.7817e-25	9.07415e-25	2.94323e-25	PANSSCG00001179/PANSSCG00001631/PANSSCG00001677/PANSSCG00001678/PANSSCG00002354/PANSSCG00002407/PANSSCG00002771/PANSSCG00002888/PANSSCG00003025/PANSSCG00003947/PANSSCG00004031/PANSSCG00004455/PANSSCG00005081/PANSSCG00005084/PANSSCG00005492/PANSSCG00005667/PANSSCG00006383/PANSSCG00006518	18
GO:0002694	regulation of leukocyte activation	16/539	16/18682	1.85271e-25	9.23987e-25	2.99698e-25	PANSSCG00001248/PANSSCG00001634/PANSSCG00001741/PANSSCG00001818/PANSSCG00002048/PANSSCG00002092/PANSSCG00002111/PANSSCG00003181/PANSSCG00003537/PANSSCG00003553/PANSSCG00003753/PANSSCG00003851/PANSSCG00003882/PANSSCG00005093/PANSSCG00006216/PANSSCG00006466	16
GO:0006721	terpenoid metabolic process	16/539	16/18682	1.85271e-25	9.23987e-25	2.99698e-25	PANSSCG00002354/PANSSCG00002517/PANSSCG00003069/PANSSCG00003807/PANSSCG00003955/PANSSCG00004111/PANSSCG00004532/PANSSCG00004914/PANSSCG00005077/PANSSCG00005452/PANSSCG00005557/PANSSCG00005731/PANSSCG00006013/PANSSCG00006376/PANSSCG00006438/PANSSCG00006518	16
GO:0032409	regulation of transporter activity	16/539	16/18682	1.85271e-25	9.23987e-25	2.99698e-25	PANSSCG00001706/PANSSCG00001965/PANSSCG00002548/PANSSCG00002559/PANSSCG00002954/PANSSCG00003415/PANSSCG00003497/PANSSCG00004006/PANSSCG00004264/PANSSCG00004676/PANSSCG00004841/PANSSCG00005023/PANSSCG00005108/PANSSCG00005654/PANSSCG00006037/PANSSCG00006172	16
GO:0034764	positive regulation of transmembrane transport	16/539	16/18682	1.85271e-25	9.23987e-25	2.99698e-25	PANSSCG00001706/PANSSCG00001965/PANSSCG00002111/PANSSCG00002470/PANSSCG00002548/PANSSCG00003415/PANSSCG00003497/PANSSCG00003807/PANSSCG00004264/PANSSCG00005023/PANSSCG00005108/PANSSCG00005654/PANSSCG00005667/PANSSCG00005948/PANSSCG00006172/PANSSCG00006376	16
GO:0043062	extracellular structure organization	16/539	16/18682	1.85271e-25	9.23987e-25	2.99698e-25	PANSSCG00001179/PANSSCG00001694/PANSSCG00002044/PANSSCG00002296/PANSSCG00002697/PANSSCG00002759/PANSSCG00003363/PANSSCG00003463/PANSSCG00004732/PANSSCG00005249/PANSSCG00005480/PANSSCG00005557/PANSSCG00005823/PANSSCG00005939/PANSSCG00006091/PANSSCG00006598	16
GO:0044441	obsolete ciliary part	16/539	16/18682	1.85271e-25	9.23987e-25	2.99698e-25	PANSSCG00002548/PANSSCG00002555/PANSSCG00003068/PANSSCG00003593/PANSSCG00004044/PANSSCG00004111/PANSSCG00004182/PANSSCG00004736/PANSSCG00005093/PANSSCG00005317/PANSSCG00005415/PANSSCG00005696/PANSSCG00005899/PANSSCG00006013/PANSSCG00006516/PANSSCG00006651	16
GO:0046364	monosaccharide biosynthetic process	16/539	16/18682	1.85271e-25	9.23987e-25	2.99698e-25	PANSSCG00000871/PANSSCG00000915/PANSSCG00001631/PANSSCG00001645/PANSSCG00002034/PANSSCG00002325/PANSSCG00002394/PANSSCG00002407/PANSSCG00004264/PANSSCG00004517/PANSSCG00005023/PANSSCG00005081/PANSSCG00005654/PANSSCG00005991/PANSSCG00006103/PANSSCG00006383	16
GO:0062012	regulation of small molecule metabolic process	16/539	16/18682	1.85271e-25	9.23987e-25	2.99698e-25	PANSSCG00001179/PANSSCG00001679/PANSSCG00001714/PANSSCG00001796/PANSSCG00001885/PANSSCG00001974/PANSSCG00002354/PANSSCG00002561/PANSSCG00002771/PANSSCG00003223/PANSSCG00004676/PANSSCG00005023/PANSSCG00005277/PANSSCG00005557/PANSSCG00005609/PANSSCG00006518	16
GO:0071214	cellular response to abiotic stimulus	16/539	16/18682	1.85271e-25	9.23987e-25	2.99698e-25	PANSSCG00001884/PANSSCG00001983/PANSSCG00002056/PANSSCG00002407/PANSSCG00002548/PANSSCG00003223/PANSSCG00003320/PANSSCG00003895/PANSSCG00003907/PANSSCG00004455/PANSSCG00005081/PANSSCG00005137/PANSSCG00005899/PANSSCG00005948/PANSSCG00006013/PANSSCG00006516	16
GO:0072358		16/539	16/18682	1.85271e-25	9.23987e-25	2.99698e-25	PANSSCG00001672/PANSSCG00002111/PANSSCG00002132/PANSSCG00002548/PANSSCG00002971/PANSSCG00003980/PANSSCG00004143/PANSSCG00004205/PANSSCG00004489/PANSSCG00004638/PANSSCG00004644/PANSSCG00004676/PANSSCG00004732/PANSSCG00005093/PANSSCG00005370/PANSSCG00006091	16
GO:0099568	cytoplasmic region	16/539	16/18682	1.85271e-25	9.23987e-25	2.99698e-25	PANSSCG00001800/PANSSCG00001965/PANSSCG00002548/PANSSCG00002555/PANSSCG00003119/PANSSCG00003537/PANSSCG00003895/PANSSCG00004142/PANSSCG00004676/PANSSCG00004961/PANSSCG00005093/PANSSCG00005317/PANSSCG00005415/PANSSCG00005858/PANSSCG00005913/PANSSCG00006651	16
GO:0104004	cellular response to environmental stimulus	16/539	16/18682	1.85271e-25	9.23987e-25	2.99698e-25	PANSSCG00001884/PANSSCG00001983/PANSSCG00002056/PANSSCG00002407/PANSSCG00002548/PANSSCG00003223/PANSSCG00003320/PANSSCG00003895/PANSSCG00003907/PANSSCG00004455/PANSSCG00005081/PANSSCG00005137/PANSSCG00005899/PANSSCG00005948/PANSSCG00006013/PANSSCG00006516	16
GO:1901293	nucleoside phosphate biosynthetic process	16/539	16/18682	1.85271e-25	9.23987e-25	2.99698e-25	PANSSCG00001247/PANSSCG00001645/PANSSCG00001974/PANSSCG00002053/PANSSCG00002394/PANSSCG00002419/PANSSCG00002561/PANSSCG00003068/PANSSCG00003156/PANSSCG00003339/PANSSCG00003380/PANSSCG00003633/PANSSCG00003841/PANSSCG00004220/PANSSCG00005414/PANSSCG00006103	16
GO:0004857	enzyme inhibitor activity	22/539	36/18682	2.27202e-25	1.1313e-24	3.66942e-25	PANSSCG00002171/PANSSCG00002273/PANSSCG00002354/PANSSCG00002383/PANSSCG00002919/PANSSCG00003912/PANSSCG00004216/PANSSCG00004627/PANSSCG00004966/PANSSCG00005255/PANSSCG00005557/PANSSCG00005868/PANSSCG00005878/PANSSCG00005939/PANSSCG00006091/PANSSCG00006103/PANSSCG00006205/PANSSCG00006239/PANSSCG00006262/PANSSCG00006362/PANSSCG00006516/PANSSCG00006529	22
GO:0050708	regulation of protein secretion	20/539	28/18682	2.83134e-25	1.40755e-24	4.56545e-25	PANSSCG00000143/PANSSCG00001549/PANSSCG00001741/PANSSCG00001885/PANSSCG00002092/PANSSCG00002111/PANSSCG00002325/PANSSCG00002561/PANSSCG00003001/PANSSCG00003068/PANSSCG00003638/PANSSCG00003753/PANSSCG00003882/PANSSCG00003895/PANSSCG00004220/PANSSCG00004519/PANSSCG00005077/PANSSCG00005108/PANSSCG00005492/PANSSCG00006103	20
GO:0007049	cell cycle	24/539	47/18682	5.80621e-25	2.88187e-24	9.34746e-25	PANSSCG00001641/PANSSCG00001679/PANSSCG00001887/PANSSCG00002105/PANSSCG00002111/PANSSCG00002171/PANSSCG00002548/PANSSCG00002579/PANSSCG00003025/PANSSCG00003181/PANSSCG00003576/PANSSCG00003957/PANSSCG00004333/PANSSCG00004597/PANSSCG00004700/PANSSCG00005028/PANSSCG00005393/PANSSCG00005621/PANSSCG00005664/PANSSCG00005778/PANSSCG00006172/PANSSCG00006279/PANSSCG00006362/PANSSCG00006594	24
GO:0002764	immune response-regulating signaling pathway	17/539	19/18682	8.41403e-25	4.14331e-24	1.3439e-24	PANSSCG00001654/PANSSCG00001675/PANSSCG00001684/PANSSCG00001706/PANSSCG00001741/PANSSCG00002092/PANSSCG00002111/PANSSCG00002552/PANSSCG00003029/PANSSCG00003497/PANSSCG00003553/PANSSCG00003753/PANSSCG00003882/PANSSCG00004006/PANSSCG00004467/PANSSCG00004961/PANSSCG00005858	17
GO:0006720	isoprenoid metabolic process	17/539	19/18682	8.41403e-25	4.14331e-24	1.3439e-24	PANSSCG00002354/PANSSCG00002517/PANSSCG00003069/PANSSCG00003582/PANSSCG00003807/PANSSCG00003955/PANSSCG00004111/PANSSCG00004532/PANSSCG00004914/PANSSCG00005077/PANSSCG00005452/PANSSCG00005557/PANSSCG00005731/PANSSCG00006013/PANSSCG00006376/PANSSCG00006438/PANSSCG00006518	17
GO:0015672	monovalent inorganic cation transport	17/539	19/18682	8.41403e-25	4.14331e-24	1.3439e-24	PANSSCG00001247/PANSSCG00001617/PANSSCG00001707/PANSSCG00001916/PANSSCG00002548/PANSSCG00003339/PANSSCG00003380/PANSSCG00003655/PANSSCG00003899/PANSSCG00003907/PANSSCG00004903/PANSSCG00005030/PANSSCG00005215/PANSSCG00005311/PANSSCG00005347/PANSSCG00005534/PANSSCG00005661	17
GO:0019318	hexose metabolic process	17/539	19/18682	8.41403e-25	4.14331e-24	1.3439e-24	PANSSCG00000871/PANSSCG00000915/PANSSCG00001631/PANSSCG00001645/PANSSCG00001974/PANSSCG00002034/PANSSCG00002325/PANSSCG00002394/PANSSCG00002407/PANSSCG00002561/PANSSCG00003068/PANSSCG00003841/PANSSCG00004517/PANSSCG00005081/PANSSCG00005991/PANSSCG00006103/PANSSCG00006383	17
GO:0061061	muscle structure development	17/539	19/18682	8.41403e-25	4.14331e-24	1.3439e-24	PANSSCG00001637/PANSSCG00001731/PANSSCG00001800/PANSSCG00001867/PANSSCG00001936/PANSSCG00003309/PANSSCG00003986/PANSSCG00004039/PANSSCG00004638/PANSSCG00004645/PANSSCG00004732/PANSSCG00004841/PANSSCG00005030/PANSSCG00005137/PANSSCG00005884/PANSSCG00005923/PANSSCG00006456	17
GO:0009792	embryo development ending in birth or egg hatching	20/539	29/18682	8.88158e-25	4.36666e-24	1.41634e-24	PANSSCG00001549/PANSSCG00001942/PANSSCG00002111/PANSSCG00002132/PANSSCG00002548/PANSSCG00002971/PANSSCG00003475/PANSSCG00003807/PANSSCG00003980/PANSSCG00004041/PANSSCG00004143/PANSSCG00004205/PANSSCG00004489/PANSSCG00004542/PANSSCG00004638/PANSSCG00004732/PANSSCG00005093/PANSSCG00005311/PANSSCG00005496/PANSSCG00006376	20
GO:0008610	lipid biosynthetic process	22/539	38/18682	1.26141e-24	6.19204e-24	2.00841e-24	PANSSCG00000613/PANSSCG00001179/PANSSCG00001885/PANSSCG00001942/PANSSCG00002407/PANSSCG00002419/PANSSCG00002559/PANSSCG00002954/PANSSCG00003497/PANSSCG00003553/PANSSCG00003582/PANSSCG00003955/PANSSCG00004449/PANSSCG00004532/PANSSCG00004914/PANSSCG00005081/PANSSCG00005480/PANSSCG00005813/PANSSCG00005823/PANSSCG00006037/PANSSCG00006346/PANSSCG00006518	22
GO:0009887	animal organ morphogenesis	29/539	81/18682	2.11826e-24	1.03818e-23	3.36737e-24	PANSSCG00001549/PANSSCG00001637/PANSSCG00001672/PANSSCG00001674/PANSSCG00002132/PANSSCG00002548/PANSSCG00003031/PANSSCG00003076/PANSSCG00003119/PANSSCG00003309/PANSSCG00003363/PANSSCG00003463/PANSSCG00003787/PANSSCG00003851/PANSSCG00003895/PANSSCG00004143/PANSSCG00004205/PANSSCG00004489/PANSSCG00004638/PANSSCG00004644/PANSSCG00004732/PANSSCG00004736/PANSSCG00005093/PANSSCG00005415/PANSSCG00005629…	29
GO:0006812	cation transport	30/539	89/18682	2.65323e-24	1.29834e-23	4.21121e-24	PANSSCG00001247/PANSSCG00001617/PANSSCG00001706/PANSSCG00001707/PANSSCG00001840/PANSSCG00001916/PANSSCG00002548/PANSSCG00002883/PANSSCG00003031/PANSSCG00003339/PANSSCG00003380/PANSSCG00003415/PANSSCG00003497/PANSSCG00003655/PANSSCG00003808/PANSSCG00003895/PANSSCG00003899/PANSSCG00003907/PANSSCG00004324/PANSSCG00004588/PANSSCG00004841/PANSSCG00004903/PANSSCG00005030/PANSSCG00005215/PANSSCG00005311…	30
GO:0032386	regulation of intracellular transport	16/539	17/18682	3.06655e-24	1.49124e-23	4.83689e-24	PANSSCG00001654/PANSSCG00001706/PANSSCG00001741/PANSSCG00001849/PANSSCG00001885/PANSSCG00001983/PANSSCG00003025/PANSSCG00003553/PANSSCG00004308/PANSSCG00004538/PANSSCG00005093/PANSSCG00005539/PANSSCG00005667/PANSSCG00005875/PANSSCG00005913/PANSSCG00005919	16
GO:0098562	cytoplasmic side of membrane	16/539	17/18682	3.06655e-24	1.49124e-23	4.83689e-24	PANSSCG00000950/PANSSCG00000999/PANSSCG00001217/PANSSCG00001425/PANSSCG00001549/PANSSCG00001625/PANSSCG00001655/PANSSCG00001867/PANSSCG00002111/PANSSCG00002548/PANSSCG00002552/PANSSCG00003102/PANSSCG00003181/PANSSCG00004676/PANSSCG00005899/PANSSCG00006243	16
GO:0098857	membrane microdomain	16/539	17/18682	3.06655e-24	1.49124e-23	4.83689e-24	PANSSCG00001549/PANSSCG00001694/PANSSCG00001818/PANSSCG00003031/PANSSCG00003553/PANSSCG00003957/PANSSCG00004220/PANSSCG00004467/PANSSCG00004676/PANSSCG00004903/PANSSCG00005108/PANSSCG00005331/PANSSCG00005452/PANSSCG00005563/PANSSCG00006279/PANSSCG00006438	16
GO:1902532	negative regulation of intracellular signal transduction	16/539	17/18682	3.06655e-24	1.49124e-23	4.83689e-24	PANSSCG00001550/PANSSCG00001884/PANSSCG00002062/PANSSCG00002111/PANSSCG00002273/PANSSCG00002548/PANSSCG00002559/PANSSCG00002744/PANSSCG00002954/PANSSCG00004264/PANSSCG00004597/PANSSCG00005654/PANSSCG00005675/PANSSCG00006037/PANSSCG00006206/PANSSCG00006529	16
GO:0051272	positive regulation of cellular component movement	18/539	23/18682	4.27245e-24	2.07443e-23	6.72848e-24	PANSSCG00001582/PANSSCG00001583/PANSSCG00001674/PANSSCG00001741/PANSSCG00001965/PANSSCG00002111/PANSSCG00003553/PANSSCG00003807/PANSSCG00003895/PANSSCG00004006/PANSSCG00004676/PANSSCG00004700/PANSSCG00004732/PANSSCG00005496/PANSSCG00005667/PANSSCG00005923/PANSSCG00006376/PANSSCG00006529	18
GO:0043025	neuronal cell body	37/539	152/18682	4.74257e-24	2.29912e-23	7.45726e-24	PANSSCG00001549/PANSSCG00001617/PANSSCG00001625/PANSSCG00001654/PANSSCG00001655/PANSSCG00001983/PANSSCG00001999/PANSSCG00002111/PANSSCG00002272/PANSSCG00002540/PANSSCG00003031/PANSSCG00003088/PANSSCG00003132/PANSSCG00003324/PANSSCG00003633/PANSSCG00003655/PANSSCG00003899/PANSSCG00004039/PANSSCG00004052/PANSSCG00004333/PANSSCG00004372/PANSSCG00004597/PANSSCG00004676/PANSSCG00004700/PANSSCG00004903…	37
GO:0032446	protein modification by small protein conjugation	15/539	15/18682	6.6001e-24	3.15552e-23	1.0235e-23	PANSSCG00002552/PANSSCG00002926/PANSSCG00003233/PANSSCG00003972/PANSSCG00004041/PANSSCG00004700/PANSSCG00005007/PANSSCG00005009/PANSSCG00005505/PANSSCG00005522/PANSSCG00005837/PANSSCG00005884/PANSSCG00005917/PANSSCG00006236/PANSSCG00006529	15
GO:0040007	growth	15/539	15/18682	6.6001e-24	3.15552e-23	1.0235e-23	PANSSCG00001549/PANSSCG00001654/PANSSCG00001675/PANSSCG00001678/PANSSCG00001942/PANSSCG00002111/PANSSCG00002132/PANSSCG00003363/PANSSCG00003463/PANSSCG00004006/PANSSCG00004294/PANSSCG00004638/PANSSCG00004732/PANSSCG00005093/PANSSCG00006137	15
GO:0043903	regulation of symbiotic process	15/539	15/18682	6.6001e-24	3.15552e-23	1.0235e-23	PANSSCG00001639/PANSSCG00001641/PANSSCG00001741/PANSSCG00002044/PANSSCG00002536/PANSSCG00002579/PANSSCG00002697/PANSSCG00003001/PANSSCG00003537/PANSSCG00003753/PANSSCG00003841/PANSSCG00003882/PANSSCG00006103/PANSSCG00006383/PANSSCG00006598	15
GO:0061134	peptidase regulator activity	15/539	15/18682	6.6001e-24	3.15552e-23	1.0235e-23	PANSSCG00001248/PANSSCG00002273/PANSSCG00002383/PANSSCG00002919/PANSSCG00003912/PANSSCG00004216/PANSSCG00004627/PANSSCG00005255/PANSSCG00005878/PANSSCG00005939/PANSSCG00006091/PANSSCG00006103/PANSSCG00006239/PANSSCG00006262/PANSSCG00006529	15
GO:0072522	purine-containing compound biosynthetic process	15/539	15/18682	6.6001e-24	3.15552e-23	1.0235e-23	PANSSCG00001247/PANSSCG00001645/PANSSCG00001974/PANSSCG00002053/PANSSCG00002394/PANSSCG00002419/PANSSCG00002561/PANSSCG00003068/PANSSCG00003156/PANSSCG00003339/PANSSCG00003380/PANSSCG00003841/PANSSCG00004220/PANSSCG00005414/PANSSCG00006103	15
GO:0090066	regulation of anatomical structure size	15/539	15/18682	6.6001e-24	3.15552e-23	1.0235e-23	PANSSCG00001654/PANSSCG00001983/PANSSCG00002111/PANSSCG00003031/PANSSCG00003537/PANSSCG00003895/PANSSCG00003907/PANSSCG00003925/PANSSCG00004638/PANSSCG00004676/PANSSCG00004732/PANSSCG00005077/PANSSCG00006091/PANSSCG00006265/PANSSCG00006581	15
GO:0120031	plasma membrane bounded cell projection assembly	15/539	15/18682	6.6001e-24	3.15552e-23	1.0235e-23	PANSSCG00001947/PANSSCG00002111/PANSSCG00002540/PANSSCG00002578/PANSSCG00003537/PANSSCG00003957/PANSSCG00004333/PANSSCG00004519/PANSSCG00005064/PANSSCG00005415/PANSSCG00005621/PANSSCG00005664/PANSSCG00005871/PANSSCG00006279/PANSSCG00006651	15
GO:1901617	organic hydroxy compound biosynthetic process	15/539	15/18682	6.6001e-24	3.15552e-23	1.0235e-23	PANSSCG00001999/PANSSCG00002407/PANSSCG00003088/PANSSCG00003497/PANSSCG00004532/PANSSCG00004861/PANSSCG00004903/PANSSCG00004914/PANSSCG00005016/PANSSCG00005081/PANSSCG00005084/PANSSCG00005331/PANSSCG00005480/PANSSCG00005823/PANSSCG00006518	15
GO:1903047	mitotic cell cycle process	15/539	15/18682	6.6001e-24	3.15552e-23	1.0235e-23	PANSSCG00001679/PANSSCG00001887/PANSSCG00002171/PANSSCG00003025/PANSSCG00003957/PANSSCG00004333/PANSSCG00004597/PANSSCG00004700/PANSSCG00005621/PANSSCG00005664/PANSSCG00005778/PANSSCG00006172/PANSSCG00006279/PANSSCG00006362/PANSSCG00006594	15
GO:0000166	nucleotide binding	48/539	277/18682	6.76327e-24	3.22858e-23	1.0472e-23	PANSSCG00001549/PANSSCG00001617/PANSSCG00001637/PANSSCG00001654/PANSSCG00001658/PANSSCG00001679/PANSSCG00001694/PANSSCG00001849/PANSSCG00001963/PANSSCG00002003/PANSSCG00002108/PANSSCG00002111/PANSSCG00002407/PANSSCG00002436/PANSSCG00002517/PANSSCG00002540/PANSSCG00002883/PANSSCG00002971/PANSSCG00003031/PANSSCG00003068/PANSSCG00003069/PANSSCG00003309/PANSSCG00003841/PANSSCG00003955/PANSSCG00003957…	48
GO:0030334	regulation of cell migration	29/539	84/18682	7.09874e-24	3.3817e-23	1.09687e-23	PANSSCG00000880/PANSSCG00001550/PANSSCG00001582/PANSSCG00001583/PANSSCG00001674/PANSSCG00001741/PANSSCG00001947/PANSSCG00001965/PANSSCG00002111/PANSSCG00003025/PANSSCG00003441/PANSSCG00003553/PANSSCG00003807/PANSSCG00003851/PANSSCG00003895/PANSSCG00004006/PANSSCG00004455/PANSSCG00004638/PANSSCG00004644/PANSSCG00004676/PANSSCG00004700/PANSSCG00004732/PANSSCG00005496/PANSSCG00005667/PANSSCG00005875…	29
GO:0048598	embryonic morphogenesis	20/539	31/18682	7.11651e-24	3.3817e-23	1.09687e-23	PANSSCG00001549/PANSSCG00001731/PANSSCG00002111/PANSSCG00002132/PANSSCG00002548/PANSSCG00002971/PANSSCG00003031/PANSSCG00003851/PANSSCG00003980/PANSSCG00004143/PANSSCG00004205/PANSSCG00004489/PANSSCG00004732/PANSSCG00004736/PANSSCG00005093/PANSSCG00005249/PANSSCG00005415/PANSSCG00005582/PANSSCG00005629/PANSSCG00006651	20
GO:0052547	regulation of peptidase activity	20/539	31/18682	7.11651e-24	3.3817e-23	1.09687e-23	PANSSCG00001248/PANSSCG00001741/PANSSCG00002056/PANSSCG00002273/PANSSCG00002383/PANSSCG00002919/PANSSCG00003181/PANSSCG00003223/PANSSCG00003537/PANSSCG00003912/PANSSCG00004216/PANSSCG00004627/PANSSCG00005255/PANSSCG00005878/PANSSCG00005939/PANSSCG00006091/PANSSCG00006103/PANSSCG00006239/PANSSCG00006262/PANSSCG00006529	20
GO:0043292	contractile fiber	19/539	27/18682	7.25944e-24	3.44437e-23	1.11719e-23	PANSSCG00001628/PANSSCG00001637/PANSSCG00001684/PANSSCG00001731/PANSSCG00001800/PANSSCG00001894/PANSSCG00001936/PANSSCG00001942/PANSSCG00001948/PANSSCG00001965/PANSSCG00002883/PANSSCG00002964/PANSSCG00003029/PANSSCG00003309/PANSSCG00003986/PANSSCG00004006/PANSSCG00004841/PANSSCG00005030/PANSSCG00005943	19
GO:0008324	cation transmembrane transporter activity	21/539	36/18682	1.16876e-23	5.52858e-23	1.79321e-23	PANSSCG00001617/PANSSCG00001706/PANSSCG00001707/PANSSCG00001916/PANSSCG00002548/PANSSCG00002883/PANSSCG00003031/PANSSCG00003655/PANSSCG00003895/PANSSCG00003899/PANSSCG00003907/PANSSCG00004588/PANSSCG00004841/PANSSCG00004903/PANSSCG00005030/PANSSCG00005215/PANSSCG00005311/PANSSCG00005347/PANSSCG00005534/PANSSCG00005607/PANSSCG00005661	21
GO:0045664	regulation of neuron differentiation	21/539	36/18682	1.16876e-23	5.52858e-23	1.79321e-23	PANSSCG00001674/PANSSCG00001983/PANSSCG00002111/PANSSCG00002132/PANSSCG00002540/PANSSCG00002571/PANSSCG00003119/PANSSCG00003895/PANSSCG00004333/PANSSCG00004372/PANSSCG00004455/PANSSCG00004644/PANSSCG00004676/PANSSCG00004700/PANSSCG00004997/PANSSCG00005093/PANSSCG00005621/PANSSCG00005664/PANSSCG00005872/PANSSCG00005923/PANSSCG00006623	21
GO:0033674	positive regulation of kinase activity	20/539	32/18682	1.84748e-23	8.72591e-23	2.83028e-23	PANSSCG00000880/PANSSCG00001654/PANSSCG00001741/PANSSCG00001887/PANSSCG00002056/PANSSCG00002111/PANSSCG00002548/PANSSCG00002552/PANSSCG00002561/PANSSCG00002971/PANSSCG00003181/PANSSCG00003753/PANSSCG00003882/PANSSCG00003980/PANSSCG00004676/PANSSCG00005667/PANSSCG00005675/PANSSCG00005948/PANSSCG00006184/PANSSCG00006635	20
GO:0022857	transmembrane transporter activity	43/539	224/18682	2.44544e-23	1.15327e-22	3.74068e-23	PANSSCG00000871/PANSSCG00000915/PANSSCG00001617/PANSSCG00001619/PANSSCG00001632/PANSSCG00001694/PANSSCG00001706/PANSSCG00001707/PANSSCG00001849/PANSSCG00001916/PANSSCG00002034/PANSSCG00002282/PANSSCG00002548/PANSSCG00002883/PANSSCG00003031/PANSSCG00003278/PANSSCG00003380/PANSSCG00003644/PANSSCG00003655/PANSSCG00003895/PANSSCG00003899/PANSSCG00003907/PANSSCG00004111/PANSSCG00004588/PANSSCG00004685…	43
GO:0045861	negative regulation of proteolysis	21/539	37/18682	2.63115e-23	1.23898e-22	4.01868e-23	PANSSCG00000740/PANSSCG00001654/PANSSCG00002056/PANSSCG00002273/PANSSCG00002383/PANSSCG00002919/PANSSCG00003025/PANSSCG00003119/PANSSCG00003912/PANSSCG00004216/PANSSCG00004627/PANSSCG00005255/PANSSCG00005505/PANSSCG00005758/PANSSCG00005878/PANSSCG00005939/PANSSCG00005948/PANSSCG00006091/PANSSCG00006103/PANSSCG00006239/PANSSCG00006262	21
GO:0003006	developmental process involved in reproduction	16/539	18/18682	2.68712e-23	1.26343e-22	4.09798e-23	PANSSCG00001248/PANSSCG00001654/PANSSCG00001674/PANSSCG00001678/PANSSCG00001679/PANSSCG00002548/PANSSCG00002833/PANSSCG00002971/PANSSCG00003980/PANSSCG00004676/PANSSCG00004766/PANSSCG00005137/PANSSCG00005255/PANSSCG00005496/PANSSCG00005939/PANSSCG00006518	16
GO:0002009	morphogenesis of an epithelium	20/539	33/18682	4.56556e-23	2.14019e-22	6.94178e-23	PANSSCG00002062/PANSSCG00002111/PANSSCG00002132/PANSSCG00002548/PANSSCG00002971/PANSSCG00003119/PANSSCG00003441/PANSSCG00003980/PANSSCG00004143/PANSSCG00004205/PANSSCG00004489/PANSSCG00004644/PANSSCG00004732/PANSSCG00005093/PANSSCG00005415/PANSSCG00005555/PANSSCG00005629/PANSSCG00006075/PANSSCG00006087/PANSSCG00006651	20
GO:0006401	RNA catabolic process	20/539	33/18682	4.56556e-23	2.14019e-22	6.94178e-23	PANSSCG00000950/PANSSCG00000970/PANSSCG00000999/PANSSCG00001217/PANSSCG00001425/PANSSCG00001578/PANSSCG00001625/PANSSCG00001629/PANSSCG00001649/PANSSCG00001650/PANSSCG00001655/PANSSCG00002552/PANSSCG00002918/PANSSCG00003005/PANSSCG00003181/PANSSCG00003454/PANSSCG00003662/PANSSCG00006243/PANSSCG00006255/PANSSCG00006540	20
GO:0009314	response to radiation	18/539	25/18682	5.78499e-23	2.70776e-22	8.7827e-23	PANSSCG00001884/PANSSCG00001887/PANSSCG00001963/PANSSCG00001983/PANSSCG00002105/PANSSCG00003223/PANSSCG00003320/PANSSCG00003576/PANSSCG00004111/PANSSCG00004449/PANSSCG00005028/PANSSCG00005675/PANSSCG00005758/PANSSCG00005884/PANSSCG00005899/PANSSCG00006013/PANSSCG00006225/PANSSCG00006516	18
GO:0006614	SRP-dependent cotranslational protein targeting to membrane	19/539	29/18682	6.20754e-23	2.89685e-22	9.39604e-23	PANSSCG00000950/PANSSCG00000970/PANSSCG00000999/PANSSCG00001217/PANSSCG00001425/PANSSCG00001578/PANSSCG00001625/PANSSCG00001629/PANSSCG00001649/PANSSCG00001650/PANSSCG00001655/PANSSCG00002552/PANSSCG00002918/PANSSCG00003005/PANSSCG00003181/PANSSCG00003454/PANSSCG00006243/PANSSCG00006255/PANSSCG00006540	19
GO:0031253	cell projection membrane	19/539	29/18682	6.20754e-23	2.89685e-22	9.39604e-23	PANSSCG00001632/PANSSCG00001654/PANSSCG00001947/PANSSCG00002548/PANSSCG00002633/PANSSCG00003181/PANSSCG00003553/PANSSCG00003895/PANSSCG00004044/PANSSCG00004111/PANSSCG00004961/PANSSCG00005213/PANSSCG00005311/PANSSCG00005700/PANSSCG00005858/PANSSCG00005899/PANSSCG00006013/PANSSCG00006172/PANSSCG00006521	19
GO:0005775	vacuolar lumen	15/539	16/18682	1.02823e-22	4.76279e-22	1.54483e-22	PANSSCG00001678/PANSSCG00002044/PANSSCG00002470/PANSSCG00002578/PANSSCG00003638/PANSSCG00003912/PANSSCG00003957/PANSSCG00004216/PANSSCG00005064/PANSSCG00005137/PANSSCG00005186/PANSSCG00005871/PANSSCG00005878/PANSSCG00006239/PANSSCG00006279	15
GO:0019867	outer membrane	15/539	16/18682	1.02823e-22	4.76279e-22	1.54483e-22	PANSSCG00001619/PANSSCG00001747/PANSSCG00002552/PANSSCG00003223/PANSSCG00004039/PANSSCG00004685/PANSSCG00004995/PANSSCG00005108/PANSSCG00005237/PANSSCG00005305/PANSSCG00005539/PANSSCG00005919/PANSSCG00006013/PANSSCG00006456/PANSSCG00006554	15
GO:0032412	regulation of ion transmembrane transporter activity	15/539	16/18682	1.02823e-22	4.76279e-22	1.54483e-22	PANSSCG00001706/PANSSCG00001965/PANSSCG00002548/PANSSCG00002559/PANSSCG00002954/PANSSCG00003415/PANSSCG00003497/PANSSCG00004006/PANSSCG00004264/PANSSCG00004676/PANSSCG00004841/PANSSCG00005023/PANSSCG00005654/PANSSCG00006037/PANSSCG00006172	15
GO:0044089	positive regulation of cellular component biogenesis	15/539	16/18682	1.02823e-22	4.76279e-22	1.54483e-22	PANSSCG00002111/PANSSCG00003181/PANSSCG00003537/PANSSCG00003925/PANSSCG00004504/PANSSCG00004676/PANSSCG00004697/PANSSCG00004732/PANSSCG00005362/PANSSCG00005457/PANSSCG00005675/PANSSCG00006091/PANSSCG00006265/PANSSCG00006529/PANSSCG00006581	15
GO:0098542	defense response to other organism	15/539	16/18682	1.02823e-22	4.76279e-22	1.54483e-22	PANSSCG00000143/PANSSCG00001629/PANSSCG00001650/PANSSCG00001675/PANSSCG00002044/PANSSCG00003001/PANSSCG00003593/PANSSCG00003807/PANSSCG00003841/PANSSCG00004182/PANSSCG00004308/PANSSCG00005007/PANSSCG00005948/PANSSCG00006103/PANSSCG00006376	15
GO:0031668	cellular response to extracellular stimulus	20/539	34/18682	1.07942e-22	4.9925e-22	1.61933e-22	PANSSCG00001649/PANSSCG00001663/PANSSCG00001674/PANSSCG00001675/PANSSCG00001706/PANSSCG00001885/PANSSCG00002272/PANSSCG00002386/PANSSCG00002394/PANSSCG00002407/PANSSCG00002513/PANSSCG00003074/PANSSCG00003454/PANSSCG00003947/PANSSCG00004729/PANSSCG00005081/PANSSCG00005277/PANSSCG00005305/PANSSCG00005492/PANSSCG00006518	20
GO:0005766	primary lysosome	14/539	14/18682	2.34687e-22	1.06187e-21	3.44423e-22	PANSSCG00001678/PANSSCG00002044/PANSSCG00002470/PANSSCG00002578/PANSSCG00003638/PANSSCG00003912/PANSSCG00003957/PANSSCG00004216/PANSSCG00005064/PANSSCG00005186/PANSSCG00005871/PANSSCG00005878/PANSSCG00006239/PANSSCG00006279	14
GO:0009260	ribonucleotide biosynthetic process	14/539	14/18682	2.34687e-22	1.06187e-21	3.44423e-22	PANSSCG00001247/PANSSCG00001645/PANSSCG00001974/PANSSCG00002053/PANSSCG00002394/PANSSCG00002419/PANSSCG00002561/PANSSCG00003068/PANSSCG00003156/PANSSCG00003339/PANSSCG00003380/PANSSCG00004220/PANSSCG00005414/PANSSCG00006103	14
GO:0015077	monovalent inorganic cation transmembrane transporter activity	14/539	14/18682	2.34687e-22	1.06187e-21	3.44423e-22	PANSSCG00001617/PANSSCG00001707/PANSSCG00001916/PANSSCG00002548/PANSSCG00003655/PANSSCG00003899/PANSSCG00003907/PANSSCG00004903/PANSSCG00005030/PANSSCG00005215/PANSSCG00005311/PANSSCG00005347/PANSSCG00005534/PANSSCG00005661	14
GO:0015931	nucleobase-containing compound transport	14/539	14/18682	2.34687e-22	1.06187e-21	3.44423e-22	PANSSCG00001625/PANSSCG00001632/PANSSCG00001642/PANSSCG00001655/PANSSCG00001663/PANSSCG00001679/PANSSCG00001906/PANSSCG00001926/PANSSCG00002883/PANSSCG00003324/PANSSCG00004386/PANSSCG00005108/PANSSCG00005237/PANSSCG00006278	14
GO:0031093	platelet alpha granule lumen	14/539	14/18682	2.34687e-22	1.06187e-21	3.44423e-22	PANSSCG00001800/PANSSCG00001965/PANSSCG00003638/PANSSCG00003912/PANSSCG00004216/PANSSCG00004891/PANSSCG00005255/PANSSCG00005409/PANSSCG00005675/PANSSCG00005810/PANSSCG00005878/PANSSCG00005939/PANSSCG00006091/PANSSCG00006239	14
GO:0031968	organelle outer membrane	14/539	14/18682	2.34687e-22	1.06187e-21	3.44423e-22	PANSSCG00001619/PANSSCG00001747/PANSSCG00002552/PANSSCG00003223/PANSSCG00004039/PANSSCG00004685/PANSSCG00004995/PANSSCG00005108/PANSSCG00005237/PANSSCG00005305/PANSSCG00005539/PANSSCG00005919/PANSSCG00006456/PANSSCG00006554	14
GO:0032550	purine ribonucleoside binding	14/539	14/18682	2.34687e-22	1.06187e-21	3.44423e-22	PANSSCG00001549/PANSSCG00001654/PANSSCG00001658/PANSSCG00001679/PANSSCG00002003/PANSSCG00002407/PANSSCG00002540/PANSSCG00003957/PANSSCG00004308/PANSSCG00005081/PANSSCG00005539/PANSSCG00005899/PANSSCG00005919/PANSSCG00006279	14
GO:0033273	response to vitamin	14/539	14/18682	2.34687e-22	1.06187e-21	3.44423e-22	PANSSCG00001674/PANSSCG00001963/PANSSCG00002105/PANSSCG00003576/PANSSCG00003638/PANSSCG00003912/PANSSCG00003947/PANSSCG00004216/PANSSCG00005028/PANSSCG00005305/PANSSCG00005758/PANSSCG00005878/PANSSCG00006239/PANSSCG00006353	14
GO:0050662	obsolete coenzyme binding	14/539	14/18682	2.34687e-22	1.06187e-21	3.44423e-22	PANSSCG00001963/PANSSCG00002108/PANSSCG00002517/PANSSCG00002771/PANSSCG00003069/PANSSCG00003955/PANSSCG00004263/PANSSCG00004517/PANSSCG00004995/PANSSCG00005331/PANSSCG00005629/PANSSCG00006097/PANSSCG00006383/PANSSCG00006518	14
GO:0051188	obsolete cofactor biosynthetic process	14/539	14/18682	2.34687e-22	1.06187e-21	3.44423e-22	PANSSCG00001645/PANSSCG00001974/PANSSCG00002394/PANSSCG00002419/PANSSCG00002561/PANSSCG00003068/PANSSCG00004264/PANSSCG00004496/PANSSCG00005016/PANSSCG00005023/PANSSCG00005654/PANSSCG00005758/PANSSCG00005775/PANSSCG00006103	14
GO:0061135	endopeptidase regulator activity	14/539	14/18682	2.34687e-22	1.06187e-21	3.44423e-22	PANSSCG00001248/PANSSCG00002273/PANSSCG00002383/PANSSCG00002919/PANSSCG00003912/PANSSCG00004216/PANSSCG00004627/PANSSCG00005255/PANSSCG00005878/PANSSCG00005939/PANSSCG00006091/PANSSCG00006103/PANSSCG00006239/PANSSCG00006262	14
GO:0071826	ribonucleoprotein complex subunit organization	14/539	14/18682	2.34687e-22	1.06187e-21	3.44423e-22	PANSSCG00001625/PANSSCG00001649/PANSSCG00001654/PANSSCG00001655/PANSSCG00001730/PANSSCG00001810/PANSSCG00002436/PANSSCG00003005/PANSSCG00003102/PANSSCG00003407/PANSSCG00003454/PANSSCG00005499/PANSSCG00005785/PANSSCG00006024	14
GO:0072330	monocarboxylic acid biosynthetic process	14/539	14/18682	2.34687e-22	1.06187e-21	3.44423e-22	PANSSCG00001645/PANSSCG00001974/PANSSCG00002394/PANSSCG00002419/PANSSCG00002561/PANSSCG00003068/PANSSCG00003955/PANSSCG00004449/PANSSCG00004532/PANSSCG00004914/PANSSCG00005331/PANSSCG00006103/PANSSCG00006346/PANSSCG00006518	14
GO:0101002	ficolin-1-rich granule	14/539	14/18682	2.34687e-22	1.06187e-21	3.44423e-22	PANSSCG00001645/PANSSCG00001654/PANSSCG00001840/PANSSCG00001963/PANSSCG00002536/PANSSCG00003119/PANSSCG00003537/PANSSCG00003585/PANSSCG00005137/PANSSCG00005186/PANSSCG00005409/PANSSCG00005758/PANSSCG00006266/PANSSCG00006466	14
GO:1903522	regulation of blood circulation	14/539	14/18682	2.34687e-22	1.06187e-21	3.44423e-22	PANSSCG00001617/PANSSCG00001885/PANSSCG00002559/PANSSCG00002883/PANSSCG00002954/PANSSCG00003031/PANSSCG00003309/PANSSCG00004006/PANSSCG00004264/PANSSCG00004697/PANSSCG00005077/PANSSCG00005347/PANSSCG00005654/PANSSCG00006037	14
GO:0000956	nuclear-transcribed mRNA catabolic process	20/539	35/18682	2.45194e-22	1.10621e-21	3.58802e-22	PANSSCG00000950/PANSSCG00000970/PANSSCG00000999/PANSSCG00001217/PANSSCG00001425/PANSSCG00001578/PANSSCG00001625/PANSSCG00001629/PANSSCG00001649/PANSSCG00001650/PANSSCG00001655/PANSSCG00002552/PANSSCG00002918/PANSSCG00003005/PANSSCG00003181/PANSSCG00003454/PANSSCG00003662/PANSSCG00006243/PANSSCG00006255/PANSSCG00006540	20
GO:0034765	regulation of ion transmembrane transport	20/539	35/18682	2.45194e-22	1.10621e-21	3.58802e-22	PANSSCG00001706/PANSSCG00001867/PANSSCG00001965/PANSSCG00002111/PANSSCG00002548/PANSSCG00002559/PANSSCG00002954/PANSSCG00003415/PANSSCG00003497/PANSSCG00004006/PANSSCG00004264/PANSSCG00004676/PANSSCG00004841/PANSSCG00005023/PANSSCG00005108/PANSSCG00005654/PANSSCG00005667/PANSSCG00005948/PANSSCG00006037/PANSSCG00006172	20
GO:0006959	humoral immune response	21/539	40/18682	2.47511e-22	1.11505e-21	3.6167e-22	PANSSCG00000143/PANSSCG00001629/PANSSCG00001650/PANSSCG00001675/PANSSCG00001917/PANSSCG00002092/PANSSCG00002470/PANSSCG00002907/PANSSCG00003001/PANSSCG00003132/PANSSCG00003753/PANSSCG00003807/PANSSCG00003882/PANSSCG00005007/PANSSCG00005151/PANSSCG00005601/PANSSCG00005675/PANSSCG00005948/PANSSCG00006000/PANSSCG00006103/PANSSCG00006376	21
GO:0051591	response to cAMP	17/539	23/18682	4.46278e-22	2.00761e-21	6.51175e-22	PANSSCG00001885/PANSSCG00002394/PANSSCG00002407/PANSSCG00002548/PANSSCG00003912/PANSSCG00004006/PANSSCG00004039/PANSSCG00004216/PANSSCG00004676/PANSSCG00004697/PANSSCG00004903/PANSSCG00005081/PANSSCG00005151/PANSSCG00005878/PANSSCG00006184/PANSSCG00006239/PANSSCG00006456	17
GO:0006805	xenobiotic metabolic process	21/539	41/18682	4.93955e-22	2.21889e-21	7.19704e-22	PANSSCG00001007/PANSSCG00001654/PANSSCG00002214/PANSSCG00002354/PANSSCG00003192/PANSSCG00003298/PANSSCG00003376/PANSSCG00003955/PANSSCG00004264/PANSSCG00004532/PANSSCG00004563/PANSSCG00004861/PANSSCG00004897/PANSSCG00004914/PANSSCG00005077/PANSSCG00005480/PANSSCG00005654/PANSSCG00005823/PANSSCG00006420/PANSSCG00006518/PANSSCG00006554	21
[truncated: 2,419 more rows]

## Sheet: Supplemental_Table_S9
Supplemental Table S9. Differentially expressed genes after PRRSV infection(7dpi)
Gene ID	group without TIP insertions_7dpi_readcount	group with TIP insertions_7dpi_readcount	log2 Fold Change	P value	Adjusted P value
ENSSSCG00000018080	6706.02	2.43854	11.442	3.0825e-57	3.7844e-53
[truncated: 964 more rows]

## Sheet: Supplemental_Table_S10
Supplemental Table S10. Differentially expressed genes after PRRSV infection(14dpi)
[truncated: 2,417 more rows]

[truncated: 11 more sheets: Supplemental_Table_S11, Supplemental_Table_S12, Supplemental_Table_S13, Supplemental_Table_S14, Supplemental_Table_S15, Supplemental_Table_S16, Supplemental_Table_S17, Supplemental_Table_S18, Supplemental_Table_S19, Supplemental_Table_S20, Supplemental_Table_S21]
